# Supplementary material
Source: publisher figshare collection journal article supplement (https://future-science-group.figshare.com/ndownloader/files/34256357)
Supplement: Supplementary file 1 [file 34256357]

## Sheet: DMP analysis_FDR<0.05
Probe	t	P.Value	adj.P.Val	Delta beta difference	Direction	Chr	position (hg19)	strand	Gene_Name	UCSC_RefGene_Name	Type	NextBase	Color	Probe_rs	Probe_maf	CpG_rs	CpG_maf	SBE_rs	SBE_maf	Islands_Name	Relation_to_Island	UCSC_RefGene_Accession	UCSC_RefGene_Group	Phantom4_Enhancers	Phantom5_Enhancers	DMR	X450k_Enhancer	HMM_Island	Regulatory_Feature_Name	Regulatory_Feature_Group	GencodeBasicV12_NAME	GencodeBasicV12_Accession	GencodeBasicV12_Group	GencodeCompV12_NAME	GencodeCompV12_Accession	GencodeCompV12_Group	DNase_Hypersensitivity_NAME	DNase_Hypersensitivity_Evidence_Count	OpenChromatin_NAME	OpenChromatin_Evidence_Count	TFBS_NAME	TFBS_Evidence_Count	Methyl27_Loci	Methyl450_Loci	Random_Loci
cg16204717	18.6535	2.3e-11	1.8e-05	0.341413	HYPER	chr12	65894458	+	RP11-230G5.2		II			NA	NA	NA	NA	NA	NA		OpenSea						TRUE				RP11-230G5.2;RP11-230G5.2;RP11-230G5.2;RP11-230G5.2	ENST00000537250.1;ENST00000535315.1;ENST00000540652.1;ENST00000539653.1	3'UTR;3'UTR;3'UTR;3'UTR	RP11-230G5.2;RP11-230G5.2;RP11-230G5.2;RP11-230G5.2	ENST00000537250.1;ENST00000535315.1;ENST00000540652.1;ENST00000539653.1	3'UTR;3'UTR;3'UTR;3'UTR	chr12:65894000-65894630	3						TRUE
cg15297841	15.468	2.9e-10	0.000113311	0.169588	HYPER	chr1	54881909	-			II			NA	NA	NA	NA	NA	NA		OpenSea										RP4-705F19.1	ENST00000447150.1	TSS200	RP4-705F19.1	ENST00000447150.1	TSS200	chr1:54881325-54881975	3
cg05038268	13.3993	1.96e-09	0.00031808	0.351297	HYPER	chr11	66885281	-		KDM2A;KDM2A	I	C	Grn	NA	NA	NA	NA	NA	NA	chr11:66885275-66887330	Island	NR_027473;NM_012308	TSS1500;TSS1500					11:66641728-66644000			KDM2A	ENST00000398645.2	TSS1500	KDM2A	ENST00000398645.2	TSS1500	chr11:66885005-66886275	3						TRUE
cg21557180	13.3941	1.97e-09	0.00031808	0.150474	HYPER	chr7	30323717	-		ZNRF2	II			NA	NA	NA	NA	NA	NA	chr7:30323917-30325641	N_Shore	NM_147128	TSS1500								ZNRF2;ZNRF2;ZNRF2	ENST00000323037.4;ENST00000319243.5;ENST00000459998.1	TSS1500;TSS1500;TSS1500	ZNRF2;ZNRF2;ZNRF2	ENST00000323037.4;ENST00000319243.5;ENST00000459998.1	TSS1500;TSS1500;TSS1500			chr7:30323645-30325976	6	chr7:30323380-30326417	6		TRUE
cg25552887	-13.3602	2.03e-09	0.00031808	-0.168769	HYPO	chr16	66751144	-			II			NA	NA	NA	NA	NA	NA		OpenSea								16:66750881-66751430	Unclassified							chr16:66750980-66751255	3
cg14461974	12.5893	4.44e-09	0.000480382	0.463304	HYPER	chr2	3318039	-	TSSC1	TSSC1	I	A	Red	NA	NA	NA	NA	NA	NA	chr2:3317676-3317935	S_Shore	NM_003310	Body				TRUE				TSSC1	ENST00000478754.1	3'UTR	TSSC1;TSSC1;TSSC1	ENST00000478754.1;ENST00000463662.1;ENST00000406835.2	3'UTR;3'UTR;3'UTR	chr2:3317685-3318130	3						TRUE
cg12331425	12.3643	5.62e-09	0.000480382	0.143502	HYPER	chr17	4854391	+	ENO3	ENO3;ENO3;ENO3;ENO3	II			NA	NA	rs73343373	0.012809	NA	NA	chr17:4850942-4853907	S_Shore	NM_001976;NM_001976;NM_053013;NM_053013	1stExon;5'UTR;5'UTR;1stExon								ENO3;ENO3;ENO3;ENO3;ENO3	ENST00000522301.1;ENST00000518175.1;ENST00000519584.1;ENST00000323997.6;ENST00000323997.6	5'UTR;TSS1500;TSS200;1stExon;5'UTR	ENO3;ENO3;ENO3;ENO3;ENO3;ENO3;ENO3;ENO3;ENO3;ENO3;ENO3;ENO3;ENO3	ENST00000519266.1;ENST00000520221.1;ENST00000522798.1;ENST00000522301.1;ENST00000518175.1;ENST00000518972.1;ENST00000519300.1;ENST00000521811.1;ENST00000521811.1;ENST00000519602.1;ENST00000519602.1;ENST00000323997.6;ENST00000323997.6	5'UTR;5'UTR;5'UTR;5'UTR;TSS1500;TSS200;TSS200;1stExon;5'UTR;1stExon;5'UTR;1stExon;5'UTR	chr17:4852180-4854555	3						TRUE
cg11955425	12.3343	5.8e-09	0.000480382	0.0916601	HYPER	chr20	58089997	+			II			NA	NA	NA	NA	NA	NA		OpenSea										RP11-164D18.2	ENST00000443747.1	TSS1500	RP11-164D18.2	ENST00000443747.1	TSS1500	chr20:58089865-58090015	3
cg08814159	12.2573	6.29e-09	0.000480382	0.163171	HYPER	chr15	75872272	+	CTD-2323K18.1	PTPN9	II			NA	NA	NA	NA	NA	NA	chr15:75870802-75871814	S_Shore	NM_002833	TSS1500								PTPN9;CTD-2323K18.1	ENST00000306726.2;ENST00000568707.1	TSS1500;3'UTR	PTPN9;CTD-2323K18.1;CTD-2323K18.1;CTD-2323K18.1	ENST00000306726.2;ENST00000566032.1;ENST00000565138.1;ENST00000568707.1	TSS1500;3'UTR;3'UTR;3'UTR	chr15:75871940-75872295	3
cg20811236	12.2381	6.42e-09	0.000480382	0.330253	HYPER	chr18	46501400	+			I	A	Red	NA	NA	NA	NA	NA	NA	chr18:46501624-46502976	N_Shore					DMR		18:44755333-44755488									chr18:46501280-46501475	3						TRUE
cg02854030	12.186	6.78e-09	0.000480382	0.311951	HYPER	chr17	75878943	+		FLJ45079	II			NA	NA	NA	NA	NA	NA		OpenSea	NR_028337	Body						17:75878435-75879213	Promoter_Associated	AC015804.1	ENST00000374983.2	TSS1500	AC015804.1	ENST00000374983.2	TSS1500	chr17:75878545-75879135	3
cg03434624	12.1079	7.38e-09	0.000480382	0.355792	HYPER	chr12	123380883	-	VPS37B	VPS37B	I	A	Red	NA	NA	NA	NA	NA	NA	chr12:123380333-123380894	Island	NM_024667	TSS200					12:121946287-121946930	12:123380030-123381368	Promoter_Associated	VPS37B;VPS37B	ENST00000267202.2;ENST00000267202.2	1stExon;5'UTR	VPS37B;VPS37B;VPS37B	ENST00000267202.2;ENST00000267202.2;ENST00000535765.1	1stExon;5'UTR;TSS1500	chr12:123380205-123380930	3						TRUE
cg25728206	-11.7788	1.05e-08	0.000591885	-0.24755	HYPO	chr10	49734874	+	ARHGAP22	ARHGAP22	II			NA	NA	NA	NA	NA	NA	chr10:49731448-49732638	S_Shelf	NM_021226	Body								ARHGAP22	ENST00000374172.1	5'UTR	ARHGAP22;ARHGAP22	ENST00000374172.1;ENST00000471013.1	5'UTR;3'UTR			chr10:49733798-49735336	6				TRUE
cg05766251	11.7734	1.06e-08	0.000591885	0.141262	HYPER	chr17	37024760	-		LASP1	II			NA	NA	NA	NA	NA	NA	chr17:37025737-37027104	N_Shore	NM_006148	TSS1500					17:34277927-34278335			LASP1	ENST00000318008.5	TSS1500	LASP1	ENST00000318008.5	TSS1500	chr17:37023500-37024970	3						TRUE
cg07017242	11.53	1.39e-08	0.000723307	0.101948	HYPER	chr7	128047441	+	IMPDH1	IMPDH1;IMPDH1;IMPDH1;IMPDH1;IMPDH1;IMPDH1;IMPDH1	II			NA	NA	NA	NA	NA	NA	chr7:128045542-128046298	S_Shore	NM_001142576;NM_183243;NM_000883;NM_001142573;NM_001142574;NM_001102605;NM_001142575	Body;Body;Body;TSS1500;TSS1500;Body;TSS1500								IMPDH1;IMPDH1;IMPDH1	ENST00000343214.4;ENST00000470772.1;ENST00000496200.1	5'UTR;TSS1500;TSS1500	IMPDH1;IMPDH1;IMPDH1;IMPDH1;IMPDH1;IMPDH1	ENST00000343214.4;ENST00000496487.1;ENST00000470772.1;ENST00000496200.1;ENST00000491376.1;ENST00000473463.1	5'UTR;TSS1500;TSS1500;TSS1500;3'UTR;3'UTR	chr7:128047385-128049535	3						TRUE
cg10927449	11.2663	1.87e-08	0.000912847	0.161031	HYPER	chr2	63286621	-			II			NA	NA	NA	NA	NA	NA	chr2:63285949-63287097	Island						TRUE	2:63139454-63140720	2:63286024-63286930	Unclassified							chr2:63284840-63287870	3						TRUE
cg10601991	-11.179	2.06e-08	0.000949202	-0.382048	HYPO	chr9	108188231	+	SLC44A1		II			NA	NA	NA	NA	NA	NA		OpenSea								9:108188125-108188648	Unclassified_Cell_type_specific							chr9:108188220-108188635	3
cg01325426	11.0828	2.31e-08	0.00100129	0.111669	HYPER	chr11	536331	-	HRAS	HRAS;HRAS;HRAS;LRRC56	II			rs45473693	0.097808	NA	NA	NA	NA	chr11:534691-537718	Island	NM_176795;NM_005343;NM_001130442;NM_198075	TSS1500;TSS1500;TSS1500;TSS1500								HRAS;HRAS;HRAS;HRAS;LRRC56	ENST00000468682.2;ENST00000397596.2;ENST00000311189.7;ENST00000451590.1;ENST00000270115.7	3'UTR;TSS1500;TSS1500;TSS1500;TSS1500	HRAS;HRAS;HRAS;HRAS;HRAS;LRRC56	ENST00000468682.2;ENST00000397596.2;ENST00000311189.7;ENST00000493230.1;ENST00000451590.1;ENST00000270115.7	3'UTR;TSS1500;TSS1500;TSS1500;TSS1500;TSS1500	chr11:535865-537155	3
cg15640135	11.0109	2.51e-08	0.00103085	0.234037	HYPER	chr9	17900939	-			II			rs12004048	0.020172	NA	NA	NA	NA		OpenSea																chr9:17900545-17901010	3
cg10770023	10.945	2.71e-08	0.00105717	0.320803	HYPER	chr22	51016644	-	CPT1B,CHKB-CPT1B	CPT1B;CPT1B;CPT1B;CHKB-CPT1B;CPT1B;CPT1B;CPT1B;CPT1B	I	C	Grn	rs73445517	0.04897	NA	NA	NA	NA	chr22:51016253-51017020	Island	NM_152246;NM_001145135;NM_001145137;NR_027928;NM_152245;NM_001145136;NM_004377;NM_001145134	5'UTR;5'UTR;TSS200;Body;5'UTR;5'UTR;5'UTR;5'UTR					22:49363077-49363870	22:51016564-51016973	Unclassified_Cell_type_specific	CHKB-CPT1B;CPT1B;CHKB-CPT1B;CPT1B;CPT1B;CPT1B;CPT1B	ENST00000453634.1;ENST00000434492.2;ENST00000452668.1;ENST00000312108.7;ENST00000395650.2;ENST00000440709.1;ENST00000405237.3	3'UTR;5'UTR;3'UTR;5'UTR;5'UTR;5'UTR;TSS200	CHKB-CPT1B;CPT1B;CPT1B;CPT1B;CHKB-CPT1B;CPT1B;CPT1B;CPT1B;CPT1B;CPT1B;CPT1B;CPT1B;CHKB-CPT1B	ENST00000453634.1;ENST00000434492.2;ENST00000460853.1;ENST00000476790.1;ENST00000452668.1;ENST00000417176.1;ENST00000312108.7;ENST00000395650.2;ENST00000440709.1;ENST00000405237.3;ENST00000461117.1;ENST00000417176.1;ENST00000492556.1	3'UTR;5'UTR;3'UTR;TSS1500;3'UTR;5'UTR;5'UTR;5'UTR;5'UTR;TSS200;TSS1500;1stExon;3'UTR	chr22:51016525-51017195	3						TRUE
cg13002809	-10.8159	3.15e-08	0.00117105	-0.18958	HYPO	chr4	26362792	+	RBPJ	RBPJ;RBPJ;RBPJ;RBPJ	II			NA	NA	NA	NA	NA	NA	chr4:26361172-26361411	S_Shore	NM_203283;NM_015874;NM_203284;NM_005349	Body;Body;5'UTR;Body						4:26362550-26362816	Unclassified	RBPJ;RBPJ;RBPJ;RBPJ	ENST00000504907.1;ENST00000355476.3;ENST00000511401.1;ENST00000507561.1	TSS1500;5'UTR;5'UTR;5'UTR	RBPJ;RBPJ;RBPJ;RBPJ;RBPJ;RBPJ;RBPJ;RBPJ;RBPJ;RBPJ;RBPJ;RBPJ;RBPJ;RBPJ;RBPJ;RBPJ;RBPJ;RBPJ;RBPJ	ENST00000504907.1;ENST00000514656.3;ENST00000511451.1;ENST00000504938.1;ENST00000511546.1;ENST00000506956.1;ENST00000514380.1;ENST00000514807.1;ENST00000509158.1;ENST00000355476.3;ENST00000511401.1;ENST00000515023.1;ENST00000505958.1;ENST00000507561.1;ENST00000514730.1;ENST00000507574.1;ENST00000514675.1;ENST00000515573.1;ENST00000512351.1	TSS1500;TSS1500;TSS1500;TSS1500;5'UTR;5'UTR;5'UTR;5'UTR;5'UTR;5'UTR;5'UTR;5'UTR;5'UTR;5'UTR;5'UTR;5'UTR;5'UTR;5'UTR;5'UTR	chr4:26362505-26362995	3						TRUE
cg26924979	10.6968	3.62e-08	0.00124768	0.167777	HYPER	chr17	63175961	+	RGS9	RGS9;RGS9;RGS9	II			NA	NA	NA	NA	NA	NA		OpenSea	NM_001165933;NM_001081955;NM_003835	Body;Body;Body		chr17:63175905-63175905				17:63175596-63176260	Unclassified							chr17:63175840-63176090	3
cg04461228	10.6042	4.04e-08	0.00124768	0.207903	HYPER	chr5	92906678	-	NR2F1-AS1	FLJ42709;FLJ42709;FLJ42709	II			NA	NA	NA	NA	NA	NA	chr5:92906239-92908875	Island	NR_021490;NR_021491;NR_015369	Body;Body;TSS200					5:92931903-92933043	5:92906295-92906687	Unclassified_Cell_type_specific	RP11-65F13.2	ENST00000504474.1	3'UTR	RP11-65F13.2;RP11-65F13.2;RP11-65F13.2;RP11-65F13.2;RP11-65F13.2	ENST00000504474.1;ENST00000503134.1;ENST00000507963.1;ENST00000513055.1;ENST00000510254.1	3'UTR;3'UTR;3'UTR;3'UTR;3'UTR			chr5:92905488-92907584	6	chr5:92904980-92911054	6		TRUE
cg05156901	10.5881	4.12e-08	0.00124768	0.332314	HYPER	chr22	51016646	-	CPT1B,CHKB-CPT1B	CPT1B;CPT1B;CPT1B;CHKB-CPT1B;CPT1B;CPT1B;CPT1B;CPT1B	I	A	Red	rs73445517	0.04897	NA	NA	NA	NA	chr22:51016253-51017020	Island	NM_152246;NM_001145135;NM_001145137;NR_027928;NM_152245;NM_001145136;NM_004377;NM_001145134	5'UTR;5'UTR;TSS200;Body;5'UTR;5'UTR;5'UTR;5'UTR					22:49363077-49363870	22:51016564-51016973	Unclassified_Cell_type_specific	CHKB-CPT1B;CPT1B;CHKB-CPT1B;CPT1B;CPT1B;CPT1B;CPT1B	ENST00000453634.1;ENST00000434492.2;ENST00000452668.1;ENST00000312108.7;ENST00000395650.2;ENST00000440709.1;ENST00000405237.3	3'UTR;5'UTR;3'UTR;5'UTR;5'UTR;5'UTR;TSS200	CHKB-CPT1B;CPT1B;CPT1B;CPT1B;CHKB-CPT1B;CPT1B;CPT1B;CPT1B;CPT1B;CPT1B;CPT1B;CPT1B;CHKB-CPT1B	ENST00000453634.1;ENST00000434492.2;ENST00000460853.1;ENST00000476790.1;ENST00000452668.1;ENST00000417176.1;ENST00000312108.7;ENST00000395650.2;ENST00000440709.1;ENST00000405237.3;ENST00000461117.1;ENST00000417176.1;ENST00000492556.1	3'UTR;5'UTR;3'UTR;TSS1500;3'UTR;5'UTR;5'UTR;5'UTR;5'UTR;TSS200;TSS1500;1stExon;3'UTR	chr22:51016525-51017195	3						TRUE
cg00204649	-10.5731	4.2e-08	0.00124768	-0.214249	HYPO	chr21	43227994	-	PRDM15	PRDM15;PRDM15	II			NA	NA	NA	NA	NA	NA	chr21:43229294-43229508	N_Shore	NM_022115;NM_001040424	Body;Body								PRDM15	ENST00000470586.1	3'UTR	PRDM15;PRDM15;PRDM15;PRDM15;TMPRSS3	ENST00000470586.1;ENST00000486812.1;ENST00000441787.1;ENST00000495217.1;ENST00000553129.1	3'UTR;3'UTR;3'UTR;3'UTR;3'UTR								TRUE
cg25799986	10.5368	4.38e-08	0.00124768	0.137053	HYPER	chr20	44098281	-	AL031663.1	WFDC2	II			NA	NA	NA	NA	NA	NA	chr20:44098280-44099536	Island	NM_006103	TSS200					20:43531695-43532266			WFDC2;WFDC2	ENST00000372676.3;ENST00000217425.5	TSS200;TSS200	WFDC2;WFDC2	ENST00000372676.3;ENST00000217425.5	TSS200;TSS200	chr20:44097960-44098715	3					TRUE	TRUE
cg03495498	10.5021	4.57e-08	0.00124768	0.402134	HYPER	chr14	97878346	-			II			NA	NA	NA	NA	NA	NA		OpenSea					DMR	TRUE	14:96948066-96948239													chr14:97878252-97879010	4		TRUE
cg15002163	10.4916	4.63e-08	0.00124768	0.139757	HYPER	chr2	240161924	+	HDAC4	HDAC4	II			NA	NA	NA	NA	NA	NA		OpenSea	NM_006037	Body				TRUE	2:239826517-239826956			HDAC4	ENST00000456922.2	5'UTR	HDAC4;HDAC4;HDAC4;HDAC4;HDAC4	ENST00000446876.1;ENST00000463007.1;ENST00000493582.1;ENST00000535493.1;ENST00000456922.2	5'UTR;3'UTR;3'UTR;3'UTR;5'UTR	chr2:240161880-240162150	3						TRUE
cg05644480	10.4915	4.63e-08	0.00124768	0.108683	HYPER	chr19	45418020	-	APOC1	APOC1	II			NA	NA	NA	NA	NA	NA		OpenSea	NM_001645	5'UTR	low-CpG:50109421-50109914					19:45417929-45418645	Promoter_Associated	APOC1	ENST00000252491.4	5'UTR	APOC1	ENST00000252491.4	5'UTR	chr19:45417785-45418275	3						TRUE
cg24101009	10.45	4.87e-08	0.00126807	0.0769588	HYPER	chr11	93863858	+	PANX1	PANX1	II			NA	NA	NA	NA	NA	NA	chr11:93861560-93862773	S_Shore	NM_015368	Body		chr11:93863761-93863761		TRUE										chr11:93863845-93864530	3						TRUE
cg16760981	10.407	5.13e-08	0.00129269	0.186547	HYPER	chr11	63688531	-			II			NA	NA	NA	NA	NA	NA	chr11:63683743-63684628	S_Shelf								11:63688481-63689309	Unclassified							chr11:63688425-63688915	3						TRUE
cg15679784	10.3352	5.59e-08	0.0013665	0.0832012	HYPER	chr9	132043422	+		LOC101929331	II			rs17482706	0.11158	NA	NA	NA	NA		OpenSea	NR_121587	TSS1500								RP11-344B5.2	ENST00000455981.1	TSS1500	RP11-344B5.2	ENST00000455981.1	TSS1500			chr9:132042505-132043674	6
cg04977618	-10.2253	6.4e-08	0.00143187	-0.217297	HYPO	chr16	65149083	-	CDH11	CDH11	II			NA	NA	NA	NA	NA	NA		OpenSea	NM_001797	5'UTR				TRUE				CDH11;CDH11;CDH11;CDH11;CDH11	ENST00000566827.1;ENST00000569624.1;ENST00000536902.1;ENST00000394156.3;ENST00000268603.4	5'UTR;3'UTR;5'UTR;5'UTR;5'UTR	CDH11;CDH11;CDH11;CDH11;CDH11;CDH11;CDH11;CDH11;CDH11;CDH11;CDH11;CDH11;CDH11	ENST00000566827.1;ENST00000569624.1;ENST00000568340.1;ENST00000536902.1;ENST00000394156.3;ENST00000562998.1;ENST00000562325.1;ENST00000268603.4;ENST00000564317.1;ENST00000565210.1;ENST00000563492.1;ENST00000563255.1;ENST00000564770.1	5'UTR;3'UTR;3'UTR;5'UTR;5'UTR;5'UTR;5'UTR;5'UTR;5'UTR;3'UTR;3'UTR;3'UTR;3'UTR								TRUE
cg21211664	10.2208	6.44e-08	0.00143187	0.237391	HYPER	chr9	131312073	-	RP11-216B9.6		II			rs77165973	0.011729	NA	NA	NA	NA	chr9:131314228-131315496	N_Shelf										RP11-216B9.6	ENST00000434999.1	3'UTR	RP11-216B9.6	ENST00000434999.1	3'UTR	chr9:131311800-131312335	3						TRUE
cg13909775	10.2204	6.44e-08	0.00143187	0.180996	HYPER	chr7	42928520	-			II			rs113134437	0.010522	NA	NA	NA	NA		OpenSea				chr7:42927750-42927750			7:42894218-42895088	7:42927279-42928713	Promoter_Associated_Cell_type_specific							chr7:42927300-42928710	3
cg04923194	10.1852	6.72e-08	0.00143187	0.222022	HYPER	chr11	83393677	+	DLG2,RP11-160H12.2	DLG2;DLG2;DLG2;DLG2	II			NA	NA	NA	NA	NA	NA		OpenSea	NM_001142702;NM_001142699;NM_001364;NM_001142700	TSS1500;Body;Body;Body				TRUE		11:83393589-83393788	Unclassified_Cell_type_specific	DLG2;DLG2;DLG2;RP11-160H12.2;DLG2	ENST00000398304.1;ENST00000426717.2;ENST00000404783.3;ENST00000533669.1;ENST00000376106.3	TSS1500;TSS1500;TSS1500;5'UTR;5'UTR	DLG2;DLG2;DLG2;DLG2;DLG2;DLG2;DLG2;DLG2;RP11-160H12.2;DLG2;DLG2	ENST00000524601.1;ENST00000434967.1;ENST00000398304.1;ENST00000420775.2;ENST00000426717.2;ENST00000456295.2;ENST00000404783.3;ENST00000529399.1;ENST00000533669.1;ENST00000529111.1;ENST00000376106.3	TSS1500;5'UTR;TSS1500;TSS1500;TSS1500;TSS1500;TSS1500;5'UTR;5'UTR;3'UTR;5'UTR	chr11:83393625-83393890	3						TRUE
cg06864079	10.1788	6.78e-08	0.00143187	0.15752	HYPER	chr14	23352029	+		REM2	II			NA	NA	NA	NA	NA	NA	chr14:23355738-23356402	N_Shelf	NM_173527	TSS1500				TRUE				REM2;REM2	ENST00000267396.4;ENST00000536884.1	TSS1500;TSS1500	REM2;REM2	ENST00000267396.4;ENST00000536884.1	TSS1500;TSS1500	chr14:23351665-23352735	3						TRUE
cg27370890	10.112	7.36e-08	0.00144101	0.227622	HYPER	chr1	19274318	-	IFFO2	IFFO2	II			rs112730914	0.010064	NA	NA	NA	NA		OpenSea	NM_001136265	Body														chr1:19274100-19274475	3
cg17659710	-10.0825	7.64e-08	0.00144101	-0.132827	HYPO	chr1	90372443	-	RP11-302M6.4,LRRC8D	LRRC8D;LRRC8D	II			NA	NA	NA	NA	NA	NA		OpenSea	NM_001134479;NM_018103	5'UTR;5'UTR		chr1:90372321-90372321				1:90372376-90372477	Unclassified_Cell_type_specific	LRRC8D;LRRC8D	ENST00000337338.5;ENST00000394593.3	5'UTR;5'UTR	LRRC8D;LRRC8C;LRRC8D;LRRC8D;LRRC8D;LRRC8D;LRRC8D;LRRC8D	ENST00000527156.1;ENST00000370453.5;ENST00000441269.2;ENST00000525774.1;ENST00000337338.5;ENST00000394593.3;ENST00000532201.1;ENST00000414841.1	5'UTR;3'UTR;5'UTR;5'UTR;5'UTR;5'UTR;5'UTR;5'UTR	chr1:90372220-90372710	3
cg11014740	10.0705	7.75e-08	0.00144101	0.0978448	HYPER	chr2	129079223	+			II			NA	NA	NA	NA	NA	NA	chr2:129079631-129080170	N_Shore							2:128795508-128795694									chr2:129078645-129079710	3						TRUE
cg06325472	10.0523	7.93e-08	0.00144101	0.129405	HYPER	chr5	174045086	-			II			NA	NA	NA	NA	NA	NA		OpenSea						TRUE				RP11-267A15.3	ENST00000505567.1	TSS200	RP11-267A15.3	ENST00000505567.1	TSS200	chr5:174044920-174045335	3
cg23149098	-10.0399	8.05e-08	0.00144101	-0.216133	HYPO	chr7	133169151	+	EXOC4	EXOC4	II			NA	NA	NA	NA	NA	NA		OpenSea	NM_021807	Body						7:133168925-133169277	Unclassified_Cell_type_specific				EXOC4;EXOC4	ENST00000486013.1;ENST00000486409.1	5'UTR;5'UTR	chr7:133168920-133169215	3
cg03497546	-10.0197	8.26e-08	0.00144101	-0.271794	HYPO	chr9	112901651	+	PALM2-AKAP2,AKAP2	AKAP2;PALM2-AKAP2;PALM2-AKAP2;AKAP2;AKAP2	II			NA	NA	NA	NA	NA	NA		OpenSea	NM_001136562;NM_007203;NM_147150;NM_001004065;NM_001198656	Body;Body;Body;Body;Body								AKAP2	ENST00000482335.1	5'UTR	AKAP2	ENST00000482335.1	5'UTR					chr9:112898096-112901762	5
cg11197630	10.0171	8.29e-08	0.00144101	0.221391	HYPER	chr5	56712591	-	CTD-2023N9.1		II			NA	NA	NA	NA	NA	NA		OpenSea						TRUE				CTD-2023N9.1	ENST00000506106.1	5'UTR	CTD-2023N9.1	ENST00000506106.1	5'UTR	chr5:56712485-56712650	3						TRUE
cg05498188	10.0036	8.43e-08	0.00144101	0.265428	HYPER	chr6	64247428	-	PTP4A1		II			NA	NA	NA	NA	NA	NA		OpenSea													PTP4A1	ENST00000470661.1	5'UTR	chr6:64247080-64247915	3
cg24363820	9.99836	8.48e-08	0.00144101	0.260135	HYPER	chr22	51016703	-	CPT1B,CHKB-CPT1B	CPT1B;CPT1B;CPT1B;CHKB-CPT1B;CPT1B;CPT1B;CPT1B;CPT1B	I	A	Red	NA	NA	NA	NA	NA	NA	chr22:51016253-51017020	Island	NM_152246;NM_001145135;NM_001145137;NR_027928;NM_152245;NM_001145136;NM_004377;NM_001145134	5'UTR;5'UTR;TSS200;Body;5'UTR;5'UTR;5'UTR;5'UTR					22:49363077-49363870	22:51016564-51016973	Unclassified_Cell_type_specific	CHKB-CPT1B;CPT1B;CHKB-CPT1B;CPT1B;CPT1B;CPT1B;CPT1B	ENST00000453634.1;ENST00000434492.2;ENST00000452668.1;ENST00000312108.7;ENST00000395650.2;ENST00000440709.1;ENST00000405237.3	3'UTR;5'UTR;3'UTR;5'UTR;5'UTR;5'UTR;TSS1500	CHKB-CPT1B;CPT1B;CPT1B;CPT1B;CHKB-CPT1B;CPT1B;CPT1B;CPT1B;CPT1B;CPT1B;CPT1B;CHKB-CPT1B	ENST00000453634.1;ENST00000434492.2;ENST00000460853.1;ENST00000476790.1;ENST00000452668.1;ENST00000312108.7;ENST00000395650.2;ENST00000440709.1;ENST00000461117.1;ENST00000405237.3;ENST00000417176.1;ENST00000492556.1	3'UTR;5'UTR;3'UTR;TSS1500;3'UTR;5'UTR;5'UTR;5'UTR;TSS1500;TSS1500;TSS200;3'UTR	chr22:51016525-51017195	3						TRUE
cg15444648	9.89666	9.64e-08	0.0015785	0.138338	HYPER	chr5	92907851	-	NR2F1-AS1	FLJ42709;FLJ42709;FLJ42709	II			NA	NA	NA	NA	NA	NA	chr5:92906239-92908875	Island	NR_015369;NR_021490;NR_021491	TSS1500;Body;Body			RDMR	TRUE	5:92933473-92934164	5:92906983-92908154	Unclassified_Cell_type_specific	RP11-65F13.2	ENST00000504474.1	3'UTR	RP11-65F13.2;RP11-65F13.2;RP11-65F13.2;RP11-65F13.2;RP11-65F13.2	ENST00000504474.1;ENST00000503134.1;ENST00000507963.1;ENST00000513055.1;ENST00000510254.1	3'UTR;3'UTR;3'UTR;3'UTR;3'UTR	chr5:92907620-92908935	3						TRUE
cg17513264	9.89192	9.69e-08	0.0015785	0.256905	HYPER	chr14	94385134	-	FAM181A-AS1	FAM181A;FAM181A;FAM181A-AS1	II			NA	NA	NA	NA	NA	NA		OpenSea	NM_001207071;NM_138344;NR_027004	TSS200;TSS200;Body								FAM181A;FAM181A;FAM181A-AS1	ENST00000557719.1;ENST00000267594.5;ENST00000554742.1	TSS200;TSS200;3'UTR	FAM181A;FAM181A;FAM181A-AS1	ENST00000557719.1;ENST00000267594.5;ENST00000554742.1	TSS200;TSS200;3'UTR
cg23639440	-9.86502	1e-07	0.0015997	-0.160436	HYPO	chr5	123805262	-			II			rs79774430	0.031079	NA	NA	NA	NA		OpenSea										CTD-2308B18.2	ENST00000510570.1	TSS200	CTD-2308B18.2	ENST00000510570.1	TSS200
cg07839926	9.8385	1.04e-07	0.00162118	0.438682	HYPER	chr10	121771388	-			I	C	Grn	NA	NA	NA	NA	NA	NA	chr10:121770981-121771423	Island							10:121760972-121761407									chr10:121771225-121771495	3						TRUE
cg05702347	-9.79229	1.1e-07	0.00168536	-0.220343	HYPO	chr6	6928298	-			II			NA	NA	NA	NA	NA	NA		OpenSea				chr6:6928196-6928196												chr6:6927725-6928655	3
cg00499700	9.71779	1.21e-07	0.00174122	0.149113	HYPER	chr5	76116088	+	F2RL1	F2RL1	II			NA	NA	NA	NA	NA	NA	chr5:76115510-76116089	Island	NM_005242	Body			RDMR		5:76150129-76151845						F2RL1	ENST00000514165.1	5'UTR	chr5:76115845-76116115	3						TRUE
cg02718825	9.70248	1.23e-07	0.00174122	0.234771	HYPER	chr20	55202842	-			II			NA	NA	NA	NA	NA	NA	chr20:55200279-55206789	Island					RDMR		20:54634678-54636335									chr20:55202200-55202915	3						TRUE
cg11803409	-9.68953	1.25e-07	0.00174122	-0.115017	HYPO	chr5	102231612	+	PAM	PAM;PAM;PAM;PAM;PAM;PAM	II			NA	NA	NA	NA	NA	NA		OpenSea	NR_033440;NM_138821;NM_000919;NM_001177306;NM_138822;NM_138766	Body;Body;Body;Body;Body;Body								PAM;PAM;PAM	ENST00000379787.4;ENST00000274392.9;ENST00000432578.1	5'UTR;5'UTR;5'UTR	PAM;PAM;PAM;PAM;PAM;PAM	ENST00000506260.1;ENST00000502472.1;ENST00000379787.4;ENST00000274392.9;ENST00000509636.1;ENST00000432578.1	TSS200;5'UTR;5'UTR;5'UTR;5'UTR;5'UTR
cg00983520	9.68009	1.27e-07	0.00174122	0.104246	HYPER	chr22	51017067	-	CPT1B,CHKB-CPT1B	CPT1B;CPT1B;CPT1B;CPT1B;CHKB-CPT1B;CPT1B;CPT1B;CPT1B;CPT1B;CPT1B;CPT1B;CPT1B	II			NA	NA	NA	NA	NA	NA	chr22:51016253-51017020	S_Shore	NM_152245;NM_001145137;NM_001145136;NM_001145135;NR_027928;NM_001145134;NM_152245;NM_004377;NM_152246;NM_001145135;NM_001145136;NM_001145134	1stExon;TSS1500;1stExon;5'UTR;Body;1stExon;5'UTR;TSS200;TSS200;1stExon;5'UTR;5'UTR				TRUE				CHKB-CPT1B;CPT1B;CHKB-CPT1B;CPT1B;CPT1B;CPT1B;CPT1B;CPT1B	ENST00000453634.1;ENST00000434492.2;ENST00000452668.1;ENST00000440709.1;ENST00000405237.3;ENST00000395650.2;ENST00000440709.1;ENST00000312108.7	3'UTR;5'UTR;3'UTR;5'UTR;TSS1500;TSS200;1stExon;TSS1500	CHKB-CPT1B;CPT1B;CHKB-CPT1B;CPT1B;CPT1B;CPT1B;CPT1B;CPT1B;CPT1B;CPT1B;CPT1B;CHKB-CPT1B	ENST00000453634.1;ENST00000434492.2;ENST00000452668.1;ENST00000440709.1;ENST00000461117.1;ENST00000405237.3;ENST00000417176.1;ENST00000395650.2;ENST00000460853.1;ENST00000440709.1;ENST00000312108.7;ENST00000492556.1	3'UTR;5'UTR;3'UTR;5'UTR;TSS1500;TSS1500;TSS1500;TSS200;TSS200;1stExon;TSS1500;3'UTR	chr22:51016525-51017195	3					TRUE	TRUE
cg10848724	9.65597	1.31e-07	0.00174122	0.30546	HYPER	chr12	123380878	-	VPS37B	VPS37B	I	A	Red	NA	NA	NA	NA	NA	NA	chr12:123380333-123380894	Island	NM_024667	TSS200					12:121946287-121946930	12:123380030-123381368	Promoter_Associated	VPS37B;VPS37B	ENST00000267202.2;ENST00000267202.2	1stExon;5'UTR	VPS37B;VPS37B;VPS37B	ENST00000267202.2;ENST00000267202.2;ENST00000535765.1	1stExon;5'UTR;TSS1500	chr12:123380205-123380930	3						TRUE
cg02755938	9.64763	1.32e-07	0.00174122	0.186041	HYPER	chr18	11850146	+	GNAL	CHMP1B;GNAL;GNAL;GNAL	II			NA	NA	NA	NA	NA	NA	chr18:11851209-11852122	N_Shore	NM_020412;NM_001142339;NM_182978;NM_002071	TSS1500;Body;Body;Body		chr18:11849903-11849903	RDMR					CHMP1B	ENST00000526991.1	TSS1500	CHMP1B	ENST00000526991.1	TSS1500	chr18:11849820-11850450	3						TRUE
cg17321385	9.63692	1.34e-07	0.00174122	0.208885	HYPER	chr2	132429793	+			II			NA	NA	NA	NA	NA	NA	chr2:132431210-132431768	N_Shore							2:132146151-132147252									chr2:132429620-132429975	3						TRUE
cg14320496	-9.63568	1.34e-07	0.00174122	-0.318271	HYPO	chr9	127960209	+			II			NA	NA	NA	NA	NA	NA	chr9:127962543-127963125	N_Shelf																							TRUE
cg25468618	9.62772	1.36e-07	0.00174122	0.286296	HYPER	chr8	144810034	-	FAM83H	FAM83H	I	C	Grn	rs150147780	0.0179	NA	NA	NA	NA	chr8:144808221-144810978	Island	NM_198488	Body					8:144879781-144883419	8:144808961-144810594	Unclassified_Cell_type_specific				FAM83H	ENST00000395103.2	1stExon	chr8:144809805-144810075	3						TRUE
cg12627354	-9.62162	1.37e-07	0.00174122	-0.117383	HYPO	chr11	46940434	+		LRP4	II			NA	NA	NA	NA	NA	NA	chr11:46939358-46940118	S_Shore	NM_002334	TSS1500					11:46897010-46897100			LRP4	ENST00000378623.1	TSS1500	LRP4;LRP4	ENST00000378623.1;ENST00000534404.1	TSS1500;TSS1500	chr11:46940305-46940610	3						TRUE
cg15910502	9.59173	1.42e-07	0.00174122	0.242157	HYPER	chr3	20085136	-	KAT2B	KAT2B	II			NA	NA	NA	NA	NA	NA	chr3:20081458-20082426	S_Shelf	NM_003884	Body						3:20084873-20085647	Unclassified	KAT2B	ENST00000426228.1	5'UTR	KAT2B	ENST00000426228.1	5'UTR	chr3:20084745-20085195	3						TRUE
cg03594395	9.58269	1.44e-07	0.00174122	0.206225	HYPER	chr12	132083805	-			II			NA	NA	NA	NA	NA	NA		OpenSea																chr12:132083685-132083895	3
cg19441349	9.56859	1.47e-07	0.00174122	0.0704152	HYPER	chr19	42495372	+	ATP1A3	ATP1A3	II			NA	NA	NA	NA	NA	NA	chr19:42497819-42498560	N_Shelf	NM_152296	Body								ATP1A3	ENST00000368080.4	5'UTR	ATP1A3;ATP1A3;ATP1A3;ATP1A3	ENST00000473086.1;ENST00000483078.1;ENST00000468774.1;ENST00000368080.4	3'UTR;3'UTR;3'UTR;5'UTR	chr19:42495025-42495515	3						TRUE
cg03591111	-9.56742	1.47e-07	0.00174122	-0.331671	HYPO	chr16	1533943	+			II			rs75484584	0.021286	NA	NA	NA	NA	chr16:1535925-1536576	N_Shore							16:1473764-1473954									chr16:1533520-1534070	3						TRUE
cg06609866	9.55475	1.49e-07	0.00174122	0.156453	HYPER	chr3	57929568	+			II			NA	NA	NA	NA	NA	NA		OpenSea						TRUE										chr3:57929400-57929855	3						TRUE
cg02550257	-9.54376	1.51e-07	0.00174122	-0.291753	HYPO	chr2	222147678	-			II			NA	NA	NA	NA	NA	NA		OpenSea						TRUE																	TRUE
cg06894709	9.52761	1.54e-07	0.00174122	0.117483	HYPER	chr1	36837262	-	STK40	STK40;STK40;STK40	II			NA	NA	NA	NA	NA	NA		OpenSea	NM_001282547;NM_001282546;NM_032017	5'UTR;5'UTR;5'UTR								STK40;STK40;STK40;STK40	ENST00000482458.1;ENST00000373129.3;ENST00000373130.3;ENST00000373132.3	3'UTR;5'UTR;5'UTR;5'UTR	STK40;STK40;STK40;STK40;STK40	ENST00000460017.1;ENST00000482458.1;ENST00000373129.3;ENST00000373130.3;ENST00000373132.3	3'UTR;3'UTR;5'UTR;5'UTR;5'UTR	chr1:36837085-36837315	3
cg15843331	9.51627	1.57e-07	0.00174122	0.230301	HYPER	chr11	61063144	-		VWCE	II			rs75393563	0.013021	NA	NA	NA	NA	chr11:61061751-61063063	S_Shore	NM_152718	TSS1500						11:61060933-61063337	Unclassified	VWCE	ENST00000335613.5	TSS1500	VWCE;VWCE;VWCE;VWCE	ENST00000538579.1;ENST00000301770.6;ENST00000535599.1;ENST00000335613.5	TSS1500;TSS1500;TSS1500;TSS1500	chr11:61063060-61063755	3						TRUE
cg14911223	9.5026	1.6e-07	0.00174122	0.0765389	HYPER	chr21	34700152	+	IFNAR1	IFNAR1	II			NA	NA	NA	NA	NA	NA	chr21:34696532-34697750	S_Shelf	NM_000629	Body								IFNAR1;IFNAR1	ENST00000416947.2;ENST00000493503.1	5'UTR;5'UTR	IFNAR1;IFNAR1	ENST00000416947.2;ENST00000493503.1	5'UTR;5'UTR								TRUE
cg08108868	9.48989	1.62e-07	0.00174122	0.120643	HYPER	chr14	90920921	-	RP11-1078H9.1		II			NA	NA	NA	NA	NA	NA		OpenSea						TRUE				RP11-1078H9.1;AL096869.5;AL096869.5;AL096869.5	ENST00000555413.1;ENST00000442515.1;ENST00000419459.1;ENST00000444942.1	3'UTR;TSS1500;TSS1500;TSS1500	RP11-1078H9.1;AL096869.5;AL096869.5;AL096869.5	ENST00000555413.1;ENST00000442515.1;ENST00000419459.1;ENST00000444942.1	3'UTR;TSS1500;TSS1500;TSS1500	chr14:90920740-90920975	3						TRUE
cg00292675	-9.48102	1.64e-07	0.00174122	-0.374861	HYPO	chr5	96045083	-	CAST	CAST;CAST;CAST;CAST;CAST	II			NA	NA	NA	NA	NA	NA		OpenSea	NM_001190442;NM_173060;NM_001284213;NM_001284212;NM_001042440	5'UTR;5'UTR;5'UTR;5'UTR;Body								CAST;CAST;CAST;CAST;CAST;CAST	ENST00000338252.3;ENST00000341926.3;ENST00000511049.1;ENST00000309190.5;ENST00000509903.1;ENST00000511782.1	5'UTR;5'UTR;5'UTR;5'UTR;5'UTR;5'UTR	CAST;CAST;CAST;CAST;CAST;CAST;CAST;CAST;CAST;CAST;CAST;CAST;CAST	ENST00000338252.3;ENST00000507487.1;ENST00000341926.3;ENST00000505402.1;ENST00000511049.1;ENST00000309190.5;ENST00000510156.1;ENST00000508117.1;ENST00000504221.1;ENST00000509903.1;ENST00000511782.1;ENST00000508197.1;ENST00000513666.1	5'UTR;5'UTR;5'UTR;5'UTR;5'UTR;5'UTR;5'UTR;5'UTR;5'UTR;5'UTR;5'UTR;5'UTR;5'UTR	chr5:96044885-96045370	3
cg14989316	9.47782	1.65e-07	0.00174122	0.0942032	HYPER	chr10	80757927	-	ZMIZ1-AS1	LOC283050;LOC283050;LOC283050	II			rs115606539	0.011729	NA	NA	NA	NA		OpenSea	NR_024431;NR_024429;NR_015429	Body;Body;Body				TRUE				RP11-202P11.1	ENST00000456353.1	3'UTR	RP11-202P11.1	ENST00000456353.1	3'UTR	chr10:80757685-80758455	3						TRUE
cg20191338	-9.47101	1.66e-07	0.00174122	-0.183888	HYPO	chr18	77905663	+		LOC100130522;LOC100130522	II			NA	NA	NA	NA	NA	NA	chr18:77905297-77905566	S_Shore	NR_028339;NR_028340	TSS200;TSS200						18:77905301-77905944	Promoter_Associated_Cell_type_specific							chr18:77905640-77906775	3						TRUE
cg27533704	-9.46531	1.68e-07	0.00174122	-0.118422	HYPO	chr3	158390525	+	GFM1	LXN;GFM1	II			rs17698034	0.015477	NA	NA	NA	NA		OpenSea	NM_020169;NM_024996	TSS200;Body						3:158389734-158391273	Promoter_Associated	LXN	ENST00000264265.3	TSS200	LXN;GFM1	ENST00000264265.3;ENST00000478254.1	TSS200;3'UTR	chr3:158389985-158390630	3						TRUE
cg19112186	9.45718	1.69e-07	0.00174122	0.2754	HYPER	chr22	51016638	-	CPT1B,CHKB-CPT1B	CPT1B;CPT1B;CPT1B;CHKB-CPT1B;CPT1B;CPT1B;CPT1B;CPT1B	I	A	Red	rs73445517	0.04897	NA	NA	NA	NA	chr22:51016253-51017020	Island	NM_152246;NM_001145135;NM_001145137;NR_027928;NM_152245;NM_001145136;NM_004377;NM_001145134	5'UTR;5'UTR;TSS200;Body;5'UTR;5'UTR;5'UTR;5'UTR					22:49363077-49363870	22:51016564-51016973	Unclassified_Cell_type_specific	CHKB-CPT1B;CPT1B;CHKB-CPT1B;CPT1B;CPT1B;CPT1B;CPT1B	ENST00000453634.1;ENST00000434492.2;ENST00000452668.1;ENST00000312108.7;ENST00000395650.2;ENST00000440709.1;ENST00000405237.3	3'UTR;5'UTR;3'UTR;5'UTR;5'UTR;5'UTR;TSS200	CHKB-CPT1B;CPT1B;CPT1B;CPT1B;CHKB-CPT1B;CPT1B;CPT1B;CPT1B;CPT1B;CPT1B;CPT1B;CPT1B;CHKB-CPT1B	ENST00000453634.1;ENST00000434492.2;ENST00000460853.1;ENST00000476790.1;ENST00000452668.1;ENST00000417176.1;ENST00000312108.7;ENST00000395650.2;ENST00000440709.1;ENST00000405237.3;ENST00000461117.1;ENST00000417176.1;ENST00000492556.1	3'UTR;5'UTR;3'UTR;TSS1500;3'UTR;5'UTR;5'UTR;5'UTR;5'UTR;TSS200;TSS1500;1stExon;3'UTR	chr22:51016525-51017195	3						TRUE
cg26843324	9.44623	1.72e-07	0.00174334	0.280445	HYPER	chr12	113905115	-	LHX5	LHX5	I	C	Grn	NA	NA	NA	NA	NA	NA	chr12:113900750-113906442	Island	NM_022363	Body			CDMR		12:112388998-112390782									chr12:113904785-113905655	3						TRUE
cg06147190	-9.42651	1.76e-07	0.00176549	-0.213659	HYPO	chr9	127143971	+	PSMB7	PSMB7	II			NA	NA	NA	NA	NA	NA		OpenSea	NM_002799	Body								PSMB7;PSMB7	ENST00000498485.1;ENST00000536392.1	3'UTR;3'UTR	PSMB7;PSMB7	ENST00000498485.1;ENST00000536392.1	3'UTR;3'UTR			chr9:127143394-127144098	4	chr9:127143333-127144135	5
cg24691904	9.41696	1.78e-07	0.00176549	0.106972	HYPER	chr12	123380870	-	VPS37B	VPS37B	II			NA	NA	NA	NA	NA	NA	chr12:123380333-123380894	Island	NM_024667	TSS200					12:121946287-121946930	12:123380030-123381368	Promoter_Associated	VPS37B;VPS37B	ENST00000267202.2;ENST00000267202.2	1stExon;5'UTR	VPS37B;VPS37B;VPS37B	ENST00000267202.2;ENST00000267202.2;ENST00000535765.1	1stExon;5'UTR;TSS200	chr12:123380205-123380930	3						TRUE
cg08889571	9.40461	1.81e-07	0.00176669	0.149521	HYPER	chr8	57232875	+	SDR16C5	SDR16C5;SDR16C5	II			rs112503269	0.024658	NA	NA	NA	NA	chr8:57232370-57232795	S_Shore	NM_138969;NM_138969	1stExon;5'UTR					8:57394645-57395824			SDR16C5;SDR16C5;SDR16C5;SDR16C5;SDR16C5	ENST00000303749.3;ENST00000538514.1;ENST00000396721.2;ENST00000303749.3;ENST00000538514.1	1stExon;1stExon;TSS200;5'UTR;5'UTR	SDR16C5;SDR16C5;SDR16C5;SDR16C5;SDR16C5	ENST00000303749.3;ENST00000522671.1;ENST00000396721.2;ENST00000303749.3;ENST00000522671.1	1stExon;1stExon;TSS200;5'UTR;5'UTR			chr8:57231997-57233465	6	chr8:57227759-57233775	6
cg10084041	9.38002	1.87e-07	0.00176669	0.151041	HYPER	chr1	228988170	-			II			NA	NA	NA	NA	NA	NA		OpenSea				chr1:228987774-228987774
cg14840264	-9.36567	1.91e-07	0.00176669	-0.16369	HYPO	chr14	71885890	+	SIPA1L1		II			NA	NA	NA	NA	NA	NA		OpenSea													SIPA1L1;SIPA1L1;SIPA1L1;SIPA1L1;SIPA1L1;SIPA1L1;SIPA1L1;SIPA1L1	ENST00000553453.1;ENST00000555989.1;ENST00000556408.1;ENST00000554126.1;ENST00000556780.1;ENST00000554362.1;ENST00000555652.1;ENST00000557151.1	5'UTR;5'UTR;5'UTR;5'UTR;5'UTR;5'UTR;5'UTR;5'UTR	chr14:71885680-71885910	3
cg00574412	9.35096	1.95e-07	0.00176669	0.137587	HYPER	chr17	27892866	+	RP11-68I3.2,ABHD15	ABHD15	II			rs61204293	0.015204	NA	NA	NA	NA	chr17:27893086-27896078	N_Shore	NM_198147	Body			RDMR											chr17:27892660-27893395	3						TRUE
cg22178694	9.35094	1.95e-07	0.00176669	0.205731	HYPER	chr7	47583286	+	TNS3	TNS3	II			NA	NA	NA	NA	NA	NA		OpenSea	NM_022748	5'UTR								TNS3	ENST00000311160.9	5'UTR	TNS3	ENST00000311160.9	5'UTR	chr7:47583285-47583795	3
cg00326642	9.3457	1.96e-07	0.00176669	0.290667	HYPER	chr3	140949072	+	ACPL2		II			NA	NA	NA	NA	NA	NA	chr3:140949911-140950963	N_Shore						TRUE							ACPL2	ENST00000505013.1	5'UTR					chr3:140948696-140952007	6		TRUE
cg09251317	9.34492	1.96e-07	0.00176669	0.159109	HYPER	chr14	77393865	+			II			NA	NA	NA	NA	NA	NA		OpenSea						TRUE		14:77392760-77393885	Unclassified							chr14:77393725-77393975	3						TRUE
cg17837918	-9.32258	2.02e-07	0.00176669	-0.172464	HYPO	chr10	103648988	-	C10orf76	C10orf76	II			NA	NA	NA	NA	NA	NA		OpenSea	NM_024541	Body								C10orf76;C10orf76;C10orf76	ENST00000431271.2;ENST00000495001.1;ENST00000263485.2	3'UTR;3'UTR;3'UTR	C10orf76;C10orf76;C10orf76	ENST00000431271.2;ENST00000495001.1;ENST00000263485.2	3'UTR;3'UTR;3'UTR			chr10:103648900-103649881	6	chr10:103648833-103650196	6
cg26580904	9.32238	2.02e-07	0.00176669	0.169575	HYPER	chr1	30995987	-			II			NA	NA	NA	NA	NA	NA		OpenSea																chr1:30995920-30996295	3
cg23942311	9.31753	2.03e-07	0.00176669	0.229455	HYPER	chr14	51606299	+			II			rs4309324	0.000308	NA	NA	NA	NA		OpenSea						TRUE										chr14:51606165-51606515	3						TRUE
cg13361023	9.31723	2.03e-07	0.00176669	0.206425	HYPER	chr15	26105176	-	ATP10A	ATP10A	II			NA	NA	NA	NA	NA	NA	chr15:26107503-26108818	N_Shelf	NM_024490	Body		chr15:26104619-26104619				15:26104984-26106349	Unclassified_Cell_type_specific	ATP10A	ENST00000553577.1	3'UTR	ATP10A;ATP10A	ENST00000389967.4;ENST00000553577.1	3'UTR;3'UTR	chr15:26104925-26106435	3						TRUE
cg02825215	9.3045	2.07e-07	0.00177687	0.121708	HYPER	chr1	32237423	-			II			NA	NA	NA	NA	NA	NA	chr1:32237827-32238661	N_Shore						TRUE		1:32236958-32238593	Promoter_Associated_Cell_type_specific									chr1:32232844-32238849	6
cg19847637	9.29387	2.1e-07	0.00178242	0.286773	HYPER	chr2	33738782	+	RASGRP3	RASGRP3;RASGRP3;RASGRP3	II			NA	NA	NA	NA	NA	NA		OpenSea	NM_015376;NM_001139488;NM_170672	TSS200;5'UTR;5'UTR								RASGRP3;RASGRP3;RASGRP3	ENST00000407811.1;ENST00000403687.3;ENST00000402538.3	TSS200;5'UTR;5'UTR	RASGRP3;RASGRP3;RASGRP3;RASGRP3;RASGRP3;RASGRP3;RASGRP3;RASGRP3	ENST00000407811.1;ENST00000403687.3;ENST00000482857.1;ENST00000442390.1;ENST00000425210.1;ENST00000402538.3;ENST00000479528.1;ENST00000437184.1	TSS200;5'UTR;5'UTR;5'UTR;5'UTR;5'UTR;5'UTR;5'UTR								TRUE
cg08933276	-9.25551	2.21e-07	0.00181307	-0.225923	HYPO	chr7	2770410	+	AMZ1,GNA12	GNA12	II			NA	NA	NA	NA	NA	NA		OpenSea	NM_007353	3'UTR					7:2736072-2736937	7:2770372-2770427	Gene_Associated_Cell_type_specific	GNA12;GNA12;GNA12;GNA12;AMZ1	ENST00000275364.3;ENST00000407904.3;ENST00000491117.1;ENST00000396960.3;ENST00000489665.1	3'UTR;3'UTR;3'UTR;3'UTR;5'UTR	GNA12;GNA12;GNA12;GNA12;GNA12;AMZ1	ENST00000275364.3;ENST00000407904.3;ENST00000491117.1;ENST00000396960.3;ENST00000496740.1;ENST00000489665.1	3'UTR;3'UTR;3'UTR;3'UTR;3'UTR;5'UTR								TRUE
cg01081346	9.25091	2.22e-07	0.00181307	0.189069	HYPER	chr22	51017151	+	CPT1B,CHKB-CPT1B	CPT1B;CPT1B;CPT1B;CPT1B;CHKB-CPT1B;CPT1B;CPT1B;CPT1B	I	A	Red	rs3810647	0.058554	NA	NA	NA	NA	chr22:51016253-51017020	S_Shore	NM_001145134;NM_001145136;NM_152246;NM_001145137;NR_027928;NM_001145135;NM_152245;NM_004377	TSS200;TSS200;TSS1500;TSS1500;Body;TSS200;TSS200;TSS1500				TRUE				CHKB-CPT1B;CPT1B;CHKB-CPT1B;CPT1B;CPT1B;CPT1B;CPT1B	ENST00000453634.1;ENST00000434492.2;ENST00000452668.1;ENST00000405237.3;ENST00000312108.7;ENST00000395650.2;ENST00000440709.1	3'UTR;5'UTR;3'UTR;TSS1500;TSS1500;TSS1500;TSS200	CHKB-CPT1B;CPT1B;CHKB-CPT1B;CPT1B;CPT1B;CPT1B;CPT1B;CPT1B;CPT1B;CPT1B;CHKB-CPT1B	ENST00000453634.1;ENST00000434492.2;ENST00000452668.1;ENST00000461117.1;ENST00000405237.3;ENST00000417176.1;ENST00000312108.7;ENST00000395650.2;ENST00000460853.1;ENST00000440709.1;ENST00000492556.1	3'UTR;5'UTR;3'UTR;TSS1500;TSS1500;TSS1500;TSS1500;TSS1500;TSS1500;TSS200;3'UTR	chr22:51016525-51017195	3						TRUE
cg07138624	9.23857	2.26e-07	0.00181307	0.37613	HYPER	chr6	34051129	+	GRM4	GRM4;GRM4;GRM4;GRM4;GRM4;GRM4	II			NA	NA	NA	NA	NA	NA		OpenSea	NM_001256813;NM_001256812;NM_000841;NM_001256811;NM_001256809;NM_001282847	Body;Body;Body;Body;Body;5'UTR																chr6:34048833-34054565	6
cg10926413	9.23368	2.27e-07	0.00181307	0.256759	HYPER	chr2	235940023	-	SH3BP4	SH3BP4	II			NA	NA	NA	NA	NA	NA		OpenSea	NM_014521	5'UTR				TRUE				SH3BP4;SH3BP4;SH3BP4;SH3BP4	ENST00000392011.2;ENST00000420127.2;ENST00000409212.1;ENST00000344528.4	5'UTR;5'UTR;5'UTR;5'UTR	SH3BP4;SH3BP4;SH3BP4;SH3BP4;SH3BP4;SH3BP4;SH3BP4;SH3BP4	ENST00000392011.2;ENST00000420127.2;ENST00000416021.1;ENST00000409212.1;ENST00000344528.4;ENST00000444916.1;ENST00000446904.1;ENST00000454947.1	5'UTR;5'UTR;5'UTR;5'UTR;5'UTR;5'UTR;5'UTR;5'UTR	chr2:235939885-235940135	3						TRUE
cg02784989	9.23251	2.28e-07	0.00181307	0.174437	HYPER	chr14	71673696	-			II			NA	NA	NA	NA	NA	NA		OpenSea										RP1-292L20.1	ENST00000549386.2	3'UTR	RP1-292L20.1	ENST00000549386.2	3'UTR	chr14:71673580-71674055	3
cg26966828	9.23034	2.28e-07	0.00181307	0.544337	HYPER	chr8	10208257	+	MSRA	MSRA;MSRA;MSRA	I	T	Red	NA	NA	NA	NA	NA	NA		OpenSea	NM_001135671;NM_001135670;NM_012331	Body;Body;Body					8:10245509-10245690			MSRA	ENST00000517594.1	5'UTR	MSRA	ENST00000517594.1	5'UTR	chr8:10207985-10208710	3						TRUE
cg03485672	9.22567	2.3e-07	0.00181307	0.364096	HYPER	chr2	130237627	+			II			NA	NA	NA	NA	NA	NA		OpenSea						TRUE										chr2:130237540-130237730	3						TRUE
cg16219954	9.21545	2.33e-07	0.0018195	0.192671	HYPER	chr21	46893155	+	COL18A1	COL18A1;COL18A1;COL18A1	II			rs73907522	0.010064	NA	NA	NA	NA	chr21:46894816-46896312	N_Shore	NM_130444;NM_030582;NM_130445	Body;Body;Body					21:45717465-45717725									chr21:46893025-46893250	3						TRUE
cg06580925	9.20288	2.37e-07	0.00183186	0.10294	HYPER	chr22	31032338	-	SLC35E4	SLC35E4;SLC35E4	II			rs7289904	0.074006	NA	NA	NA	NA	chr22:31031358-31032059	S_Shore	NM_001001479;NM_001001479	5'UTR;1stExon					22:29360853-29362944			SLC35E4;SLC35E4;SLC35E4;SLC35E4;SLC35E4;SLC35E4	ENST00000343605.4;ENST00000343605.4;ENST00000300385.8;ENST00000300385.8;ENST00000406566.1;ENST00000406566.1	5'UTR;1stExon;5'UTR;1stExon;5'UTR;1stExon	SLC35E4;SLC35E4;SLC35E4;SLC35E4;SLC35E4;SLC35E4;SLC35E4;MTMR3	ENST00000343605.4;ENST00000343605.4;ENST00000300385.8;ENST00000300385.8;ENST00000406566.1;ENST00000451479.1;ENST00000406566.1;ENST00000464734.1	5'UTR;1stExon;5'UTR;1stExon;5'UTR;TSS200;1stExon;5'UTR	chr22:31031925-31033110	3
cg18848419	9.18983	2.41e-07	0.00184569	0.216981	HYPER	chr18	11850153	+	GNAL	CHMP1B;GNAL;GNAL;GNAL	II			NA	NA	NA	NA	NA	NA	chr18:11851209-11852122	N_Shore	NM_020412;NM_001142339;NM_182978;NM_002071	TSS1500;Body;Body;Body		chr18:11849903-11849903	RDMR					CHMP1B	ENST00000526991.1	TSS1500	CHMP1B	ENST00000526991.1	TSS1500	chr18:11849820-11850450	3						TRUE
cg03505117	9.17642	2.45e-07	0.00186075	0.184	HYPER	chr4	113441608	-	RP11-402J6.1		I	A	Red	NA	NA	NA	NA	NA	NA	chr4:113444181-113444389	N_Shelf					DMR		4:113661022-113661169	4:113441453-113441680	Unclassified_Cell_type_specific	RP11-402J6.1	ENST00000504009.1	5'UTR	RP11-402J6.1	ENST00000504009.1	5'UTR	chr4:113441345-113441735	3						TRUE
cg15427182	9.14036	2.57e-07	0.00192797	0.164756	HYPER	chr16	49609452	-	ZNF423	ZNF423;ZNF423	II			NA	NA	NA	NA	NA	NA		OpenSea	NM_001271620;NM_015069	Body;Body						16:49609279-49609773	Unclassified_Cell_type_specific							chr16:49609320-49609635	3
cg09894814	9.13411	2.59e-07	0.00192797	0.166016	HYPER	chr1	222217065	-	RP11-400N13.3		II			NA	NA	NA	NA	NA	NA		OpenSea						TRUE				RP11-400N13.3	ENST00000438158.1	3'UTR	RP11-400N13.3	ENST00000438158.1	3'UTR	chr1:222216860-222217270	3						TRUE
cg01041562	9.12839	2.61e-07	0.00192797	0.245582	HYPER	chr10	82298068	+	SH2D4B	SH2D4B;SH2D4B	II			NA	NA	NA	NA	NA	NA	chr10:82295501-82296192	S_Shore	NM_207372;NM_207372	5'UTR;1stExon								SH2D4B;SH2D4B;SH2D4B;SH2D4B;SH2D4B	ENST00000339284.2;ENST00000339284.2;ENST00000372147.1;ENST00000372147.1;ENST00000470604.1	5'UTR;1stExon;5'UTR;1stExon;TSS200	SH2D4B;SH2D4B;SH2D4B;SH2D4B;SH2D4B	ENST00000339284.2;ENST00000339284.2;ENST00000372147.1;ENST00000372147.1;ENST00000470604.1	5'UTR;1stExon;5'UTR;1stExon;TSS200	chr10:82297820-82298110	3
cg08571918	9.09715	2.73e-07	0.00198398	0.183349	HYPER	chr2	105275920	+	AC013402.5		II			rs57903242	0.216697	NA	NA	NA	NA	chr2:105275588-105275940	Island							2:104642021-104642418			AC013402.5;AC013402.5	ENST00000456999.1;ENST00000456999.1	1stExon;5'UTR	AC013402.5;AC013402.5	ENST00000456999.1;ENST00000456999.1	1stExon;5'UTR	chr2:105275440-105275955	3						TRUE
cg01757101	9.0931	2.74e-07	0.00198398	0.339991	HYPER	chr21	39137559	-	KCNJ6	KCNJ6	II			NA	NA	NA	NA	NA	NA		OpenSea	NM_002240	Body											TMPRSS3	ENST00000553129.1	3'UTR					chr21:39137494-39138203	3
cg01584377	9.07637	2.8e-07	0.00201048	0.315233	HYPER	chr7	139521372	-	TBXAS1	TBXAS1;TBXAS1	II			NA	NA	NA	NA	NA	NA		OpenSea	NM_001130966;NM_001166254	5'UTR;5'UTR		chr7:139521100-139521100						TBXAS1;TBXAS1;TBXAS1	ENST00000263552.6;ENST00000425687.1;ENST00000336425.5	5'UTR;5'UTR;5'UTR	TBXAS1;TBXAS1;TBXAS1;TBXAS1	ENST00000263552.6;ENST00000425687.1;ENST00000438104.1;ENST00000336425.5	5'UTR;5'UTR;5'UTR;5'UTR	chr7:139521165-139521490	3
cg00627029	9.06195	2.86e-07	0.00203122	0.210262	HYPER	chr17	72322791	+	KIF19	KIF19	I	A	Red	NA	NA	NA	NA	NA	NA	chr17:72321948-72322461	S_Shore	NM_153209	Body			DMR	TRUE		17:72321555-72323231	Unclassified				KIF19;KIF19;KIF19	ENST00000551017.1;ENST00000359939.6;ENST00000547389.1	5'UTR;5'UTR;5'UTR	chr17:72322625-72323175	3						TRUE
cg07546139	9.04612	2.92e-07	0.00205632	0.439168	HYPER	chr5	92907553	-	NR2F1-AS1	FLJ42709;FLJ42709;FLJ42709	II			NA	NA	NA	NA	NA	NA	chr5:92906239-92908875	Island	NR_015369;NR_021490;NR_021491	TSS1500;Body;Body			RDMR	TRUE		5:92906983-92908154	Unclassified_Cell_type_specific	RP11-65F13.2	ENST00000504474.1	3'UTR	RP11-65F13.2;RP11-65F13.2;RP11-65F13.2;RP11-65F13.2;RP11-65F13.2	ENST00000504474.1;ENST00000503134.1;ENST00000507963.1;ENST00000513055.1;ENST00000510254.1	3'UTR;3'UTR;3'UTR;3'UTR;3'UTR			chr5:92905488-92907584	6	chr5:92904980-92911054	6		TRUE
cg06929216	9.03441	2.97e-07	0.0020626	0.274047	HYPER	chr13	99135607	-	STK24	STK24;STK24;STK24	II			NA	NA	NA	NA	NA	NA		OpenSea	NM_003576;NM_001032296;NM_001286649	Body;Body;Body		chr13:99135278-99135278			13:97933544-97933627			STK24	ENST00000376541.3	5'UTR	STK24;STK24	ENST00000491878.1;ENST00000376541.3	3'UTR;5'UTR	chr13:99134725-99135675	3
cg02988755	9.03062	2.98e-07	0.0020626	0.212116	HYPER	chr13	110918331	-	COL4A1	COL4A1	II			NA	NA	NA	NA	NA	NA	chr13:110918324-110918725	Island	NM_001845	Body					13:109716165-109716768									chr13:110917740-110918455	3						TRUE
cg24512005	8.99889	3.11e-07	0.00211981	0.0992976	HYPER	chr11	3014291	+		NAP1L4	II			NA	NA	NA	NA	NA	NA	chr11:3012799-3014181	S_Shore	NM_005969	TSS1500						11:3012969-3014585	Promoter_Associated	NAP1L4	ENST00000399624.3	TSS1500	NAP1L4;NAP1L4;NAP1L4;NAP1L4;NAP1L4;NAP1L4;NAP1L4	ENST00000430811.1;ENST00000529361.1;ENST00000531291.1;ENST00000526842.1;ENST00000448187.1;ENST00000532325.1;ENST00000399624.3	TSS1500;TSS1500;TSS1500;TSS1500;TSS1500;TSS1500;TSS1500	chr11:3013845-3014515	3						TRUE
cg20601192	8.9974	3.12e-07	0.00211981	0.100852	HYPER	chr2	242798443	+	PDCD1	PDCD1	I	C	Grn	NA	NA	NA	NA	NA	NA	chr2:242799488-242799696	N_Shore	NM_005018	Body					2:242447108-242447215									chr2:242798265-242798475	3						TRUE
cg03366891	8.99038	3.15e-07	0.0021216	0.123839	HYPER	chr16	24372874	-	CACNG3	CACNG3	II			NA	NA	NA	NA	NA	NA		OpenSea	NM_006539	Body					16:24280375-24280543																TRUE
cg18749617	8.97461	3.22e-07	0.00214887	0.221795	HYPER	chr15	102028637	+	PCSK6	PCSK6;PCSK6;PCSK6;PCSK6;PCSK6;PCSK6;PCSK6;PCSK6	I	A	Red	rs12437484	0.370869	NA	NA	NA	NA	chr15:102028860-102030608	N_Shore	NM_002570;NM_138320;NM_138319;NM_138324;NM_138323;NM_138325;NM_138322;NM_138321	Body;Body;Body;Body;Body;Body;Body;Body					15:99845819-99848270			PCSK6	ENST00000561177.1	3'UTR	PCSK6;PCSK6;PCSK6;PCSK6;PCSK6;PCSK6	ENST00000561177.1;ENST00000560921.1;ENST00000557794.1;ENST00000561109.1;ENST00000560271.1;ENST00000561444.1	3'UTR;3'UTR;3'UTR;3'UTR;3'UTR;3'UTR	chr15:102028205-102028915	3						TRUE
cg08790067	-8.95961	3.28e-07	0.00216942	-0.357234	HYPO	chr21	43540446	-	UMODL1	UMODL1;UMODL1;UMODL1;UMODL1	II			NA	NA	rs78747639	0.016073	NA	NA		OpenSea	NM_173568;NM_001004416;NM_001199527;NM_001199528	Body;Body;Body;Body				TRUE				UMODL1;UMODL1	ENST00000434156.1;ENST00000400423.2	TSS1500;TSS200	UMODL1;UMODL1;TMPRSS3	ENST00000434156.1;ENST00000484174.1;ENST00000553129.1	TSS1500;TSS200;3'UTR			chr21:43539906-43541356	6	chr21:43540108-43541346	6
cg11269166	-8.95511	3.3e-07	0.00216942	-0.279863	HYPO	chr2	172203847	-	METTL8	METTL8	II			NA	NA	NA	NA	NA	NA		OpenSea	NM_024770	Body				TRUE							METTL8;METTL8;METTL8	ENST00000460188.1;ENST00000460539.1;ENST00000462821.1	3'UTR;3'UTR;3'UTR	chr2:172203665-172203970	3						TRUE
cg06092953	-8.93475	3.4e-07	0.00220701	-0.308668	HYPO	chr18	77905699	-		LOC100130522;LOC100130522	II			NA	NA	NA	NA	NA	NA	chr18:77905297-77905566	S_Shore	NR_028339;NR_028340	TSS200;TSS200					18:76006690-76006793	18:77905301-77905944	Promoter_Associated_Cell_type_specific							chr18:77905640-77906775	3						TRUE
cg21155870	8.93021	3.42e-07	0.00220701	0.160175	HYPER	chr9	34591604	-			II			NA	NA	NA	NA	NA	NA	chr9:34589113-34591978	Island						TRUE	9:34578721-34581916						CNTFR	ENST00000417345.1	TSS1500	chr9:34589945-34591695	3						TRUE
cg22632947	8.90572	3.53e-07	0.00226118	0.297904	HYPER	chr17	64787784	+	PRKCA	PRKCA	II			NA	NA	NA	NA	NA	NA		OpenSea	NM_002737	Body					17:62217825-62218362									chr17:64787405-64787815	3						TRUE
cg04277677	8.90037	3.56e-07	0.00226118	0.156336	HYPER	chr22	37914685	+	CARD10	CARD10	II			NA	NA	NA	NA	NA	NA	chr22:37914768-37915883	N_Shore	NM_014550	Body														chr22:37914125-37915915	3						TRUE
cg27215832	8.88045	3.66e-07	0.00228019	0.266476	HYPER	chr5	110616732	+	CAMK4,CTC-499J9.1	CAMK4	II			NA	NA	NA	NA	NA	NA		OpenSea	NM_001744	Body								CTC-499J9.1	ENST00000504081.1	3'UTR	CAMK4;CAMK4;CTC-499J9.1	ENST00000509408.1;ENST00000504090.1;ENST00000504081.1	5'UTR;5'UTR;3'UTR			chr5:110616317-110617372	6	chr5:110615520-110616771	3
cg12234440	-8.87308	3.69e-07	0.00228019	-0.213061	HYPO	chr7	37011912	+	ELMO1	ELMO1;ELMO1;ELMO1;ELMO1;ELMO1;ELMO1	II			NA	NA	NA	NA	NA	NA		OpenSea	NR_038120;NM_001206480;NM_014800;NM_001206482;NM_001039459;NM_130442	Body;Body;Body;Body;5'UTR;5'UTR								ELMO1;ELMO1	ENST00000396040.2;ENST00000396045.3	5'UTR;5'UTR	ELMO1;ELMO1;ELMO1;ELMO1;ELMO1;ELMO1	ENST00000487843.1;ENST00000464262.2;ENST00000420636.1;ENST00000472359.1;ENST00000396040.2;ENST00000396045.3	3'UTR;3'UTR;3'UTR;3'UTR;5'UTR;5'UTR	chr7:37011780-37011975	3
cg19797516	8.86999	3.71e-07	0.00228019	0.276445	HYPER	chr10	26856454	+	APBB1IP	APBB1IP	II			NA	NA	NA	NA	NA	NA	chr10:26855906-26856198	S_Shore	NM_019043	3'UTR					10:26895913-26896474			APBB1IP	ENST00000376236.4	3'UTR	APBB1IP	ENST00000376236.4	3'UTR	chr10:26856285-26856595	3						TRUE
cg27601699	8.85838	3.77e-07	0.00228019	0.19057	HYPER	chr14	90983997	-			II			NA	NA	NA	NA	NA	NA		OpenSea																chr14:90983885-90984155	3
cg10523140	8.85025	3.81e-07	0.00228019	0.188629	HYPER	chr2	101768941	-	TBC1D8,RP11-299H21.1	TBC1D8	I	A	Red	NA	NA	NA	NA	NA	NA	chr2:101767042-101768259	S_Shore	NM_001102426	TSS1500					2:101135330-101135421			TBC1D8;TBC1D8	ENST00000376840.4;ENST00000409318.1	TSS1500;TSS1500	TBC1D8;TBC1D8;TBC1D8	ENST00000376840.4;ENST00000409318.1;ENST00000463469.1	TSS1500;TSS1500;3'UTR	chr2:101767545-101769110	3						TRUE
cg00087792	8.84469	3.84e-07	0.00228019	0.283761	HYPER	chr16	4000986	+			II			NA	NA	NA	NA	NA	NA		OpenSea							16:3940840-3940988	16:4000884-4001070	Unclassified_Cell_type_specific	RP11-462G12.1	ENST00000576810.1	TSS1500	RP11-462G12.1	ENST00000576810.1	TSS1500	chr16:4000225-4001235	3						TRUE
cg10412497	-8.84155	3.86e-07	0.00228019	-0.127099	HYPO	chr21	35707827	-	AP000320.7		II			NA	NA	NA	NA	NA	NA		OpenSea													AP000318.2	ENST00000362077.4	5'UTR	chr21:35707560-35708115	3
cg19012124	8.84133	3.86e-07	0.00228019	0.340688	HYPER	chr5	100111369	-			II			NA	NA	NA	NA	NA	NA		OpenSea																chr5:100111300-100111595	3
cg05668121	8.83668	3.88e-07	0.00228019	0.106428	HYPER	chr20	32900282	-		AHCY	II			NA	NA	NA	NA	NA	NA		OpenSea	NM_001161766	TSS1500				TRUE				AHCY	ENST00000538132.1	TSS1500	AHCY	ENST00000538132.1	TSS1500			chr20:32900015-32901089	6	chr20:32898152-32901423	6
cg11164400	8.82764	3.93e-07	0.00228019	0.107344	HYPER	chr7	94536787	-	PPP1R9A	PPP1R9A;PPP1R9A	II			NA	NA	NA	NA	NA	NA	chr7:94536849-94537477	N_Shore	NM_001166160;NM_017650	TSS200;TSS200				TRUE				PPP1R9A;PPP1R9A;PPP1R9A	ENST00000433881.1;ENST00000433360.1;ENST00000424654.1	TSS1500;TSS200;TSS200	PPP1R9A;PPP1R9A;PPP1R9A;PPP1R9A;PPP1R9A	ENST00000422324.1;ENST00000433881.1;ENST00000413325.1;ENST00000433360.1;ENST00000424654.1	TSS1500;TSS1500;5'UTR;TSS200;TSS200	chr7:94536420-94538555	3					TRUE	TRUE
cg08140104	8.82341	3.95e-07	0.00228019	0.177299	HYPER	chr14	90891231	+			II			NA	NA	rs74080973	0.019213	NA	NA		OpenSea						TRUE										chr14:90891120-90891630	3						TRUE
cg19504184	8.82209	3.96e-07	0.00228019	0.125907	HYPER	chr17	1170806	-			II			NA	NA	NA	NA	NA	NA	chr17:1171408-1171946	N_Shore								17:1170752-1171060	Unclassified_Cell_type_specific							chr17:1170660-1171075	3						TRUE
cg18806912	8.81346	4.01e-07	0.00228019	0.0726164	HYPER	chr15	42067504	+	MAPKBP1	MAPKBP1;MAPKBP1;MAPKBP1;MAPKBP1;MAPKBP1	II			NA	NA	NA	NA	NA	NA	chr15:42066488-42067230	S_Shore	NR_049762;NR_049761;NM_001128608;NM_014994;NM_001265611	Body;Body;Body;Body;Body						15:42066004-42067646	Promoter_Associated	MAPKBP1;MAPKBP1	ENST00000507762.1;ENST00000260357.7	TSS200;5'UTR	MAPKBP1;MAPKBP1;MAPKBP1;MAPKBP1	ENST00000505061.1;ENST00000507762.1;ENST00000260357.7;ENST00000502292.1	TSS200;TSS200;5'UTR;5'UTR					chr15:42064605-42071105	6
cg13587880	8.80558	4.05e-07	0.00228019	0.198019	HYPER	chr19	19599531	+	GATAD2A	GATAD2A;GATAD2A	II			NA	NA	NA	NA	NA	NA		OpenSea	NM_017660;NM_001300946	Body;Body				TRUE				GATAD2A;GATAD2A;GATAD2A	ENST00000429563.2;ENST00000537887.1;ENST00000494516.1	5'UTR;5'UTR;5'UTR	GATAD2A;GATAD2A;GATAD2A;GATAD2A	ENST00000429563.2;ENST00000473184.1;ENST00000537887.1;ENST00000494516.1	5'UTR;5'UTR;5'UTR;5'UTR	chr19:19599020-19599795	3
cg03505562	8.80189	4.07e-07	0.00228019	0.0664342	HYPER	chr16	2077447	-	SLC9A3R2	SLC9A3R2;SLC9A3R2	II			NA	NA	NA	NA	NA	NA	chr16:2077042-2077470	Island	NM_001130012;NM_004785	Body;Body					16:2016654-2017510	16:2076292-2078096	Unclassified							chr16:2077265-2077995	3						TRUE
cg15768040	-8.80096	4.08e-07	0.00228019	-0.0584456	HYPO	chr9	98222052	+	PTCH1	PTCH1;PTCH1;PTCH1;PTCH1;PTCH1;PTCH1;PTCH1;PTCH1;PTCH1;PTCH1;PTCH1;PTCH1;PTCH1;PTCH1	II			NA	NA	NA	NA	NA	NA		OpenSea	NM_001083605;NM_001083607;NM_001083606;NM_001083604;NM_000264;NM_001083602;NM_001083603;NM_001083603;NM_001083605;NM_001083602;NM_001083607;NM_000264;NM_001083606;NM_001083604	Body;Body;Body;Body;Body;Body;Body;ExonBnd;ExonBnd;ExonBnd;ExonBnd;ExonBnd;ExonBnd;ExonBnd					9:97261614-97261897			PTCH1	ENST00000331920.6	ExonBnd	PTCH1;PTCH1;PTCH1	ENST00000375290.2;ENST00000547615.1;ENST00000331920.6	3'UTR;3'UTR;ExonBnd					chr9:98220925-98226459	6
cg01614703	-8.79343	4.12e-07	0.00228019	-0.0929451	HYPO	chr12	132278510	-	SFSWAP	SFRS8	II			rs61943864	0.064959	NA	NA	NA	NA	chr12:132276571-132276783	S_Shore	NM_004592	Body					12:130844357-130844483			SFSWAP	ENST00000539506.1	5'UTR	SFSWAP	ENST00000539506.1	5'UTR	chr12:132278185-132278595	3						TRUE
cg10616974	8.79071	4.14e-07	0.00228019	0.323431	HYPER	chr17	74511719	-			II			NA	NA	NA	NA	NA	NA		OpenSea				chr17:74511289-74511289			17:72023072-72023315	17:74511159-74512169	Promoter_Associated							chr17:74511360-74512015	3						TRUE
cg05284912	-8.78707	4.16e-07	0.00228019	-0.199746	HYPO	chr11	130066747	+	ST14	ST14	II			rs117579710	0.018229	NA	NA	NA	NA		OpenSea	NM_021978	Body					11:129571681-129572082											chr11:130066115-130066935	6				TRUE
cg17395619	8.78432	4.17e-07	0.00228019	0.156493	HYPER	chr19	4607540	-			II			NA	NA	NA	NA	NA	NA	chr19:4607079-4607350	S_Shore																		chr19:4606882-4607713	6	chr19:4606945-4607793	6		TRUE
cg03401114	8.76511	4.28e-07	0.00232086	0.0635169	HYPER	chr1	40255440	+	RP1-118J21.25	BMP8B	II			NA	NA	NA	NA	NA	NA	chr1:40253683-40255172	S_Shore	NM_001720	TSS1500								RP1-118J21.25;BMP8B;BMP8B	ENST00000566366.1;ENST00000397360.2;ENST00000372827.3	5'UTR;TSS1500;TSS1500	RP1-118J21.25;BMP8B;BMP8B	ENST00000566366.1;ENST00000397360.2;ENST00000372827.3	5'UTR;TSS1500;TSS1500	chr1:40255340-40255550	3					TRUE	TRUE
cg12904769	-8.76141	4.31e-07	0.00232086	-0.295844	HYPO	chr16	68730576	+	CDH3	CDH3	II			NA	NA	NA	NA	NA	NA	chr16:68732058-68732306	N_Shore	NM_001793	Body								CDH3	ENST00000542274.1	5'UTR	CDH3;CDH3;CDH3;CDH3	ENST00000569117.1;ENST00000567674.1;ENST00000569080.1;ENST00000542274.1	5'UTR;5'UTR;5'UTR;5'UTR	chr16:68730525-68730795	3
cg13305823	8.75571	4.34e-07	0.00232316	0.0940788	HYPER	chr6	29454557	+	MAS1L	MAS1L	II			NA	NA	rs114684783	0.011582	NA	NA		OpenSea	NM_052967	1stExon								MAS1L	ENST00000377127.3	1stExon	MAS1L	ENST00000377127.3	1stExon	chr6:29454340-29454710	3						TRUE
cg09313610	8.72964	4.5e-07	0.00236397	0.26661	HYPER	chr7	26479333	+	AC004540.5	LOC441204	II			NA	NA	NA	NA	NA	NA		OpenSea	NR_015364	Body								AC004540.5	ENST00000418758.2	5'UTR	AC004540.5;AC004540.5;AC004540.5;AC004540.5;AC004540.5	ENST00000448056.1;ENST00000439120.1;ENST00000430548.1;ENST00000421862.1;ENST00000418758.2	TSS1500;5'UTR;5'UTR;5'UTR;5'UTR
cg18558006	8.72505	4.53e-07	0.00236397	0.128281	HYPER	chr14	69725842	-	RP11-363J20.2	GALNTL1;GALNTL1	II			NA	NA	rs137954866	0.0128	rs137954866	0.0128	chr14:69726250-69728393	N_Shore	NM_020692;NM_001168368	TSS1500;TSS1500			RDMR			14:69725332-69726340	Unclassified	GALNTL1;GALNTL1;GALNTL1;GALNTL1;GALNTL1;RP11-363J20.2	ENST00000337827.4;ENST00000536652.1;ENST00000448469.3;ENST00000553669.1;ENST00000554858.1;ENST00000556316.1	TSS1500;TSS1500;TSS1500;TSS1500;TSS200;3'UTR	GALNTL1;GALNTL1;GALNTL1;GALNTL1;GALNTL1;GALNTL1;GALNTL1;RP11-363J20.2	ENST00000554317.1;ENST00000337827.4;ENST00000536652.1;ENST00000553471.1;ENST00000448469.3;ENST00000553669.1;ENST00000554858.1;ENST00000556316.1	TSS1500;TSS1500;TSS1500;TSS1500;TSS1500;TSS1500;TSS200;3'UTR			chr14:69725353-69729571	6	chr14:69725839-69728856	6		TRUE
cg19816290	8.71794	4.57e-07	0.00236397	0.110063	HYPER	chr22	19701515	-		SEPT5	II			NA	NA	NA	NA	NA	NA	chr22:19701514-19701891	Island	NM_002688	TSS1500						22:19701471-19702622	Unclassified_Cell_type_specific	AC000093.3;SEPT5;SEPT5;SEPT5	ENST00000427252.1;ENST00000455784.2;ENST00000406395.1;ENST00000446882.2	3'UTR;TSS1500;TSS1500;TSS1500	AC000093.3;SEPT5;SEPT5;SEPT5;SEPT5;SEPT5	ENST00000427252.1;ENST00000455784.2;ENST00000406395.1;ENST00000406172.2;ENST00000446882.2;ENST00000412544.1	3'UTR;TSS1500;TSS1500;TSS1500;TSS1500;TSS1500	chr22:19701460-19701895	3						TRUE
cg01809941	8.7175	4.58e-07	0.00236397	0.1472	HYPER	chr5	14581404	-		FAM105A	II			NA	NA	NA	NA	NA	NA	chr5:14581497-14582569	N_Shore	NM_019018	TSS1500						5:14581212-14582784	Promoter_Associated	FAM105A	ENST00000274217.3	TSS1500	FAM105A	ENST00000274217.3	TSS1500			chr5:14580432-14583424	6	chr5:14579629-14583437	6		TRUE
cg06634460	8.71714	4.58e-07	0.00236397	0.346042	HYPER	chr12	123380891	-	VPS37B	VPS37B	I	C	Grn	NA	NA	NA	NA	NA	NA	chr12:123380333-123380894	Island	NM_024667	TSS200					12:121946287-121946930	12:123380030-123381368	Promoter_Associated	VPS37B;VPS37B	ENST00000267202.2;ENST00000267202.2	1stExon;5'UTR	VPS37B;VPS37B;VPS37B	ENST00000267202.2;ENST00000267202.2;ENST00000535765.1	1stExon;5'UTR;TSS1500	chr12:123380205-123380930	3						TRUE
cg17083541	8.70595	4.65e-07	0.00236397	0.300568	HYPER	chr20	46507727	-			II			rs16993045	0.108992	NA	NA	NA	NA		OpenSea																chr20:46507285-46507750	3
cg17131176	-8.70297	4.67e-07	0.00236397	-0.116615	HYPO	chr16	78802689	+	WWOX	WWOX;WWOX	II			rs9938250	0.172674	NA	NA	NA	NA		OpenSea	NM_016373;NM_001291997	Body;Body						16:78802604-78802934	Unclassified_Cell_type_specific	WWOX	ENST00000408984.3	3'UTR	WWOX;WWOX	ENST00000408984.3;ENST00000569332.1	3'UTR;3'UTR	chr16:78802685-78802955	3
cg08267442	8.70261	4.67e-07	0.00236397	0.22072	HYPER	chr15	91473386	+		UNC45A	I	A	Red	NA	NA	NA	NA	NA	NA	chr15:91473314-91473592	Island	NM_001039675	TSS200					15:89274295-89274503	15:91472810-91473699	Promoter_Associated	UNC45A	ENST00000394275.2	TSS200	UNC45A;UNC45A;UNC45A	ENST00000480470.1;ENST00000556319.1;ENST00000553358.1	TSS200;TSS200;5'UTR	chr15:91473020-91473590	3						TRUE
cg16299091	8.69785	4.7e-07	0.00236397	0.180746	HYPER	chr18	11850139	+	GNAL	CHMP1B;GNAL;GNAL;GNAL	II			NA	NA	NA	NA	NA	NA	chr18:11851209-11852122	N_Shore	NM_020412;NM_001142339;NM_182978;NM_002071	TSS1500;Body;Body;Body		chr18:11849903-11849903	RDMR					CHMP1B	ENST00000526991.1	TSS1500	CHMP1B	ENST00000526991.1	TSS1500	chr18:11849820-11850450	3						TRUE
cg08330893	-8.69436	4.72e-07	0.00236397	-0.129238	HYPO	chr11	14224248	-	SPON1	SPON1	II			NA	NA	rs7940688	0.017929	rs7940688	0.017929		OpenSea	NM_006108	Body														chr11:14224045-14224295	3
cg26742187	8.69063	4.75e-07	0.00236397	0.134226	HYPER	chr16	1131907	-			II			rs1469820	0.375	NA	NA	NA	NA	chr16:1128223-1130394	S_Shore							16:1071806-1072027									chr16:1131825-1131995	3						TRUE
cg14564369	-8.6836	4.8e-07	0.00237	-0.275919	HYPO	chr12	28703909	-	CCDC91		II			NA	NA	NA	NA	NA	NA		OpenSea																chr12:28703780-28703955	3
cg21218864	8.67967	4.82e-07	0.00237	0.231675	HYPER	chr1	206730120	-	RASSF5	RASSF5;RASSF5;RASSF5	II			NA	NA	NA	NA	NA	NA	chr1:206730397-206730908	N_Shore	NM_182663;NM_182665;NM_182664	Body;TSS1500;Body						1:206729919-206731222	Promoter_Associated	RASSF5	ENST00000304534.8	TSS1500	RASSF5	ENST00000304534.8	TSS1500	chr1:206729520-206730735	3						TRUE
cg06875836	-8.66283	4.94e-07	0.00237599	-0.118688	HYPO	chr5	7888576	+	MTRR	MTRR;MTRR	II			NA	NA	NA	NA	NA	NA		OpenSea	NM_024010;NM_002454	Body;Body				TRUE				MTRR	ENST00000341013.6	3'UTR	MTRR;MTRR;MTRR;MTRR;MTRR;MTRR	ENST00000508101.1;ENST00000509961.1;ENST00000512311.1;ENST00000513439.1;ENST00000341013.6;ENST00000511461.1	5'UTR;5'UTR;5'UTR;3'UTR;3'UTR;3'UTR								TRUE
cg18096764	-8.66148	4.94e-07	0.00237599	-0.242705	HYPO	chr20	52226460	-	AC005808.3		II			NA	NA	NA	NA	NA	NA		OpenSea					DMR	TRUE		20:52225994-52226656	Promoter_Associated	ZNF217;AC005808.3	ENST00000540425.1;ENST00000444112.1	TSS200;5'UTR	ZNF217;ZNF217;AC005808.3	ENST00000431687.1;ENST00000540425.1;ENST00000444112.1	TSS1500;TSS200;5'UTR	chr20:52225965-52226955	3
cg11358114	8.6572	4.97e-07	0.00237599	0.22592	HYPER	chr2	45233390	-	SIX2	SIX2	II			NA	NA	NA	NA	NA	NA	chr2:45231211-45231482	S_Shore	NM_016932	Body					2:45086894-45087184									chr2:45233165-45233835	3						TRUE
cg09140241	-8.65238	5.01e-07	0.00237599	-0.361593	HYPO	chr13	38069293	+			II			NA	NA	NA	NA	NA	NA		OpenSea																chr13:38069205-38069555	3
cg09109383	8.64898	5.03e-07	0.00237599	0.190997	HYPER	chr16	16083164	-	ABCC1	ABCC1;ABCC1;ABCC1;ABCC1;ABCC1	II			NA	NA	NA	NA	NA	NA		OpenSea	NM_019862;NM_019898;NM_019899;NM_004996;NM_019900	Body;Body;Body;Body;Body				TRUE										chr16:16082925-16083555	3						TRUE
cg20000107	-8.64601	5.05e-07	0.00237599	-0.171937	HYPO	chr7	85832	-			II			NA	NA	NA	NA	NA	NA	chr7:82324-82592	S_Shelf																chr7:85445-86115	3						TRUE
cg17285709	8.63562	5.13e-07	0.00237599	0.124946	HYPER	chr2	220300242	+	SPEG	SPEG	II			NA	NA	NA	NA	NA	NA	chr2:220299483-220300243	Island	NM_005876	Body																chr2:220298478-220304894	6	chr2:220298510-220300314	6		TRUE
cg07490668	8.62954	5.17e-07	0.00237599	0.152295	HYPER	chr9	136498308	-			I	C	Grn	NA	NA	NA	NA	NA	NA		OpenSea										LL09NC01-254D11.1	ENST00000564021.1	TSS200	LL09NC01-254D11.1	ENST00000564021.1	TSS200	chr9:136497780-136498355	3
cg03063413	8.62716	5.19e-07	0.00237599	0.278637	HYPER	chr15	25965140	+	ATP10A	ATP10A	II			NA	NA	NA	NA	NA	NA		OpenSea	NM_024490	Body														chr15:25964705-25965195	3
cg18786782	8.62684	5.19e-07	0.00237599	0.092652	HYPER	chr3	13936527	-			II			NA	NA	NA	NA	NA	NA	chr3:13936521-13936866	Island						TRUE	3:13911301-13912559	3:13936515-13938580	Promoter_Associated											chr3:13936143-13938658	6		TRUE
cg04697946	8.6207	5.23e-07	0.00237599	0.289699	HYPER	chr2	3654582	-	COLEC11	COLEC11;COLEC11	I	C	Grn	NA	NA	NA	NA	NA	NA		OpenSea	NM_024027;NM_199235	Body;Body					2:3632111-3632500	2:3654563-3654657	Unclassified_Cell_type_specific	COLEC11	ENST00000487365.1	5'UTR	COLEC11	ENST00000487365.1	5'UTR	chr2:3654485-3654815	3						TRUE
cg19356515	-8.61877	5.25e-07	0.00237599	-0.160492	HYPO	chr11	108408950	-	EXPH5	EXPH5;EXPH5;EXPH5	II			NA	NA	NA	NA	NA	NA		OpenSea	NM_001144763;NM_015065;NM_001144765	Body;Body;TSS200								EXPH5;EXPH5	ENST00000439956.2;ENST00000443411.1	TSS200;TSS200	EXPH5;EXPH5	ENST00000439956.2;ENST00000443411.1	TSS200;TSS200	chr11:108408880-108409170	3						TRUE
cg04922566	8.61483	5.28e-07	0.00237599	0.143711	HYPER	chr3	57198244	-	IL17RD	IL17RD	II			NA	NA	NA	NA	NA	NA	chr3:57198243-57199378	Island	NM_017563	Body								IL17RD;IL17RD	ENST00000479825.1;ENST00000320057.5	3'UTR;5'UTR	IL17RD;IL17RD;IL17RD;IL17RD;IL17RD	ENST00000479825.1;ENST00000498471.1;ENST00000469841.1;ENST00000467210.1;ENST00000320057.5	3'UTR;3'UTR;3'UTR;5'UTR;5'UTR	chr3:57198200-57199175	3						TRUE
cg19683289	8.61314	5.29e-07	0.00237599	0.145864	HYPER	chr3	111577948	-	PHLDB2	PHLDB2;PHLDB2;PHLDB2;PHLDB2	II			rs17490485	0.033333	NA	NA	NA	NA	chr3:111578237-111578739	N_Shore	NM_001134439;NM_145753;NM_001134438;NM_001134437	TSS1500;TSS200;TSS200;Body					3:113060604-113061588	3:111577872-111579756	Unclassified	PHLDB2;PHLDB2;PHLDB2;PHLDB2	ENST00000478922.1;ENST00000477695.1;ENST00000393925.3;ENST00000412622.1	TSS1500;TSS1500;TSS1500;TSS200	PHLDB2;PHLDB2;PHLDB2;PHLDB2;PHLDB2	ENST00000478922.1;ENST00000477695.1;ENST00000393925.3;ENST00000412622.1;ENST00000498699.1	TSS1500;TSS1500;TSS1500;TSS200;TSS200	chr3:111577885-111578415	3
cg14363469	8.61227	5.3e-07	0.00237599	0.111445	HYPER	chr9	98790268	-			II			NA	NA	NA	NA	NA	NA	chr9:98789666-98790305	Island						TRUE	9:97829515-97830126	9:98789385-98790302	Unclassified_Cell_type_specific							chr9:98789425-98791155	3						TRUE
cg27536197	-8.60651	5.34e-07	0.00237599	-0.0768163	HYPO	chr6	14777785	-			II			NA	NA	NA	NA	NA	NA		OpenSea				chr6:14777704-14777704												chr6:14777740-14778230	3
cg14592690	8.59673	5.41e-07	0.00237599	0.0839505	HYPER	chr6	31884432	+	C2	C2;C2	II			NA	NA	NA	NA	NA	NA		OpenSea	NM_001282457;NM_001178063	5'UTR;Body								C2;C2	ENST00000469372.1;ENST00000432397.2	5'UTR;5'UTR	C2;C2;C2	ENST00000469372.1;ENST00000497706.1;ENST00000432397.2	5'UTR;5'UTR;5'UTR
cg13400720	-8.59656	5.41e-07	0.00237599	-0.246135	HYPO	chr6	16413855	+	ATXN1	ATXN1;ATXN1	II			NA	NA	NA	NA	NA	NA		OpenSea	NM_001128164;NM_000332	5'UTR;5'UTR		chr6:16413735-16413735		TRUE				ATXN1;ATXN1	ENST00000244769.3;ENST00000436367.1	5'UTR;5'UTR	ATXN1;ATXN1	ENST00000244769.3;ENST00000450222.1	5'UTR;5'UTR	chr6:16413625-16413995	3
cg21916600	-8.58845	5.48e-07	0.00237599	-0.137809	HYPO	chr21	43386354	+			II			NA	NA	NA	NA	NA	NA		OpenSea													TMPRSS3	ENST00000553129.1	3'UTR	chr21:43386305-43386735	3
cg13287621	8.58525	5.5e-07	0.00237599	0.0913054	HYPER	chr5	3853654	-			II			NA	NA	NA	NA	NA	NA	chr5:3854536-3854796	N_Shore							5:3906626-3906735																TRUE
cg18050420	8.582	5.52e-07	0.00237599	0.315803	HYPER	chr18	5455865	-	EPB41L3	EPB41L3;EPB41L3;EPB41L3;EPB41L3	II			NA	NA	NA	NA	NA	NA		OpenSea	NM_001281533;NM_001281535;NM_001281534;NM_012307	Body;Body;Body;Body		chr18:5455725-5455725												chr18:5455720-5455990	3
cg01443318	8.57217	5.6e-07	0.00237599	0.11389	HYPER	chr16	67466260	-	HSD11B2	HSD11B2	II			NA	NA	NA	NA	NA	NA	chr16:67464388-67465462	S_Shore	NM_000196	Body						16:67465852-67466435	Unclassified_Cell_type_specific	RP11-297D21.3;RP11-297D21.2;HSD11B2	ENST00000571772.1;ENST00000567261.1;ENST00000567684.1	TSS1500;TSS1500;5'UTR	HSD11B2;RP11-297D21.3;RP11-297D21.2;HSD11B2	ENST00000569303.1;ENST00000571772.1;ENST00000567261.1;ENST00000567684.1	5'UTR;TSS1500;TSS1500;5'UTR	chr16:67464345-67466795	3						TRUE
cg26349358	8.56973	5.62e-07	0.00237599	0.189371	HYPER	chr2	468989	+			II			NA	NA	NA	NA	NA	NA	chr2:467849-468659	S_Shore							2:458924-458990																TRUE
cg23719371	8.56953	5.62e-07	0.00237599	0.103184	HYPER	chr1	149299453	+			II			NA	NA	NA	NA	NA	NA		OpenSea							1:147565508-147566078													chr1:149299395-149300657	6
cg19073371	8.56893	5.63e-07	0.00237599	0.0887642	HYPER	chr17	36584088	-		ARHGAP23	II			NA	NA	NA	NA	NA	NA	chr17:36584420-36585453	N_Shore	NM_001199417	TSS1500								ARHGAP23;ARHGAP23	ENST00000437668.2;ENST00000431231.1	TSS1500;TSS1500	ARHGAP23;ARHGAP23	ENST00000437668.2;ENST00000431231.1	TSS1500;TSS1500			chr17:36583417-36587054	6	chr17:36584088-36586360	6
cg15577390	-8.5632	5.67e-07	0.00237599	-0.296698	HYPO	chr19	8277343	-	CERS4	CERS4	II			NA	NA	NA	NA	NA	NA	chr19:8273530-8273920	S_Shelf	NM_024552	5'UTR								CERS4;CERS4;CERS4;CERS4	ENST00000558331.1;ENST00000251363.5;ENST00000559450.1;ENST00000559336.1	5'UTR;5'UTR;5'UTR;5'UTR	CERS4;CERS4;CERS4;CERS4;CERS4;CERS4;CERS4;CERS4;CERS4;CERS4	ENST00000561008.1;ENST00000558268.1;ENST00000558331.1;ENST00000561053.1;ENST00000559490.1;ENST00000251363.5;ENST00000559450.1;ENST00000559336.1;ENST00000558501.1;ENST00000560412.1	5'UTR;5'UTR;5'UTR;5'UTR;5'UTR;5'UTR;5'UTR;5'UTR;5'UTR;5'UTR	chr19:8276760-8277495	3
cg22146903	8.56199	5.68e-07	0.00237599	0.11054	HYPER	chr22	31032276	-	SLC35E4	SLC35E4;SLC35E4	II			NA	NA	NA	NA	NA	NA	chr22:31031358-31032059	S_Shore	NM_001001479;NM_001001479	5'UTR;1stExon					22:29360853-29362944			SLC35E4;SLC35E4;SLC35E4;SLC35E4;SLC35E4	ENST00000343605.4;ENST00000343605.4;ENST00000300385.8;ENST00000300385.8;ENST00000406566.1	5'UTR;1stExon;5'UTR;1stExon;TSS200	SLC35E4;SLC35E4;SLC35E4;SLC35E4;SLC35E4;SLC35E4;MTMR3	ENST00000343605.4;ENST00000343605.4;ENST00000300385.8;ENST00000300385.8;ENST00000406566.1;ENST00000451479.1;ENST00000464734.1	5'UTR;1stExon;5'UTR;1stExon;TSS200;TSS1500;5'UTR	chr22:31031925-31033110	3
cg22843428	8.56158	5.69e-07	0.00237599	0.0882945	HYPER	chr17	48620231	-	EPN3	EPN3	II			NA	NA	NA	NA	NA	NA	chr17:48619111-48619794	S_Shore	NM_017957	3'UTR						17:48618647-48620579	Promoter_Associated	EPN3	ENST00000268933.3	3'UTR	EPN3;SPATA20	ENST00000268933.3;ENST00000504334.1	3'UTR;TSS200	chr17:48619720-48620235	3
cg01210781	-8.5574	5.72e-07	0.00237599	-0.151464	HYPO	chr9	138344647	-			II			NA	NA	NA	NA	NA	NA		OpenSea								9:138344292-138345002	Unclassified_Cell_type_specific							chr9:138344545-138344995	3
cg25781210	8.55254	5.76e-07	0.00237599	0.256207	HYPER	chr5	142610141	+			II			NA	NA	NA	NA	NA	NA		OpenSea						TRUE		5:142610088-142610166	Unclassified							chr5:142609145-142610350	3						TRUE
cg26652022	-8.55026	5.78e-07	0.00237599	-0.0780698	HYPO	chr2	15777016	+			II			NA	NA	NA	NA	NA	NA		OpenSea						TRUE														chr2:15776483-15779328	6		TRUE
cg08847614	8.53933	5.87e-07	0.00237942	0.351772	HYPER	chr1	4079006	-			II			NA	NA	NA	NA	NA	NA		OpenSea							1:3978695-3979310									chr1:4078825-4079235	3						TRUE
cg00089528	8.5352	5.9e-07	0.00237942	0.187276	HYPER	chr5	180609278	+			II			rs10479609	0.070906	NA	NA	NA	NA	chr5:180610053-180610263	N_Shore								5:180608734-180609321	Unclassified_Cell_type_specific							chr5:180609000-180609475	3						TRUE
cg03005851	8.53483	5.9e-07	0.00237942	0.214412	HYPER	chr1	11113287	-			II			NA	NA	NA	NA	NA	NA		OpenSea						TRUE										chr1:11112925-11114195	3						TRUE
cg07557493	-8.53439	5.91e-07	0.00237942	-0.247336	HYPO	chr2	173273196	-			II			NA	NA	NA	NA	NA	NA		OpenSea																chr2:173272960-173273455	3
cg02606526	8.50578	6.15e-07	0.00245645	0.0743603	HYPER	chr3	52541666	+	STAB1	STAB1	II			NA	NA	NA	NA	NA	NA		OpenSea	NM_015136	Body											STAB1;STAB1	ENST00000481607.1;ENST00000484850.1	5'UTR;TSS1500	chr3:52541400-52541735	3
cg03945400	8.50438	6.16e-07	0.00245645	0.0956526	HYPER	chr15	38543209	+			II			NA	NA	NA	NA	NA	NA	chr15:38544002-38545532	N_Shore					RDMR			15:38543172-38544768	Promoter_Associated	SPRED1	ENST00000299084.4	TSS1500	SPRED1	ENST00000299084.4	TSS1500					chr15:38542692-38549201	6		TRUE
cg05844321	8.49782	6.22e-07	0.00245645	0.0700013	HYPER	chr3	13663398	-	FBLN2	FBLN2;FBLN2;FBLN2	II			NA	NA	NA	NA	NA	NA		OpenSea	NM_001165035;NM_001998;NM_001004019	Body;Body;Body					3:13638379-13638540	3:13663122-13663621	Unclassified_Cell_type_specific	FBLN2	ENST00000404922.3	ExonBnd	FBLN2	ENST00000404922.3	ExonBnd	chr3:13663345-13663655	3						TRUE
cg13620799	8.49411	6.25e-07	0.00245645	0.32491	HYPER	chr4	54424280	+	FIP1L1,LNX1	LNX1;LNX1;LNX1	II			NA	NA	NA	NA	NA	NA		OpenSea	NM_032622;NM_001126328;NM_032622	1stExon;Body;5'UTR				TRUE				LNX1;LNX1	ENST00000306888.2;ENST00000306888.2	1stExon;5'UTR	LNX1;LNX1	ENST00000306888.2;ENST00000306888.2	1stExon;5'UTR			chr4:54424196-54425101	6	chr4:54423904-54425743	6		TRUE
cg06127112	-8.4884	6.3e-07	0.00245645	-0.17853	HYPO	chr16	19222476	+	SYT17	SYT17;SYT17	II			NA	NA	NA	NA	NA	NA		OpenSea	NM_016524;NM_001308157	Body;Body		chr16:19222406-19222406						SYT17	ENST00000568433.1	TSS200	SYT17	ENST00000568433.1	TSS200	chr16:19222345-19222610	3
cg04012053	8.48734	6.31e-07	0.00245645	0.144125	HYPER	chr16	70680631	+	IL34	IL34;IL34	I	A	Red	NA	NA	NA	NA	NA	NA		OpenSea	NM_152456;NM_152456	1stExon;5'UTR					16:69237821-69238159			IL34;IL34;IL34	ENST00000288098.2;ENST00000288098.2;ENST00000429149.2	5'UTR;1stExon;5'UTR	IL34;IL34;IL34;IL34;IL34;IL34;IL34	ENST00000569641.1;ENST00000569641.1;ENST00000288098.2;ENST00000288098.2;ENST00000574181.1;ENST00000429149.2;ENST00000563721.2	1stExon;5'UTR;5'UTR;1stExon;TSS200;5'UTR;5'UTR	chr16:70680105-70681295	3						TRUE
cg03550075	-8.48534	6.33e-07	0.00245645	-0.144104	HYPO	chr12	132278448	-	SFSWAP	SFRS8	I	A	Red	rs35198651	0.132877	NA	NA	NA	NA	chr12:132276571-132276783	S_Shore	NM_004592	Body					12:130844357-130844483			SFSWAP	ENST00000539506.1	5'UTR	SFSWAP	ENST00000539506.1	5'UTR	chr12:132278185-132278595	3						TRUE
cg23002857	-8.48293	6.35e-07	0.00245645	-0.271227	HYPO	chr7	51046610	-	RP4-724E13.2		II			NA	NA	NA	NA	NA	NA		OpenSea										RP4-724E13.2	ENST00000420449.1	5'UTR	RP4-724E13.2	ENST00000420449.1	5'UTR	chr7:51046440-51046855	3
cg14890509	8.47957	6.38e-07	0.00245645	0.119868	HYPER	chr19	45943865	-	ERCC1		II			NA	NA	NA	NA	NA	NA	chr19:45942865-45943396	S_Shore										ERCC1	ENST00000423698.2	5'UTR	ERCC1	ENST00000423698.2	5'UTR			chr19:45943801-45944657	6	chr19:45942386-45944926	6		TRUE
cg21343292	8.47532	6.42e-07	0.00245909	0.158278	HYPER	chr3	136364977	-	STAG1	STAG1	II			NA	NA	NA	NA	NA	NA		OpenSea	NM_005862	5'UTR								STAG1;STAG1;STAG1;STAG1	ENST00000480733.1;ENST00000383202.2;ENST00000236698.5;ENST00000434713.2	5'UTR;5'UTR;5'UTR;5'UTR	STAG1;STAG1;STAG1;STAG1;STAG1	ENST00000480733.1;ENST00000383202.2;ENST00000487065.1;ENST00000236698.5;ENST00000434713.2	5'UTR;5'UTR;5'UTR;5'UTR;5'UTR	chr3:136364825-136365055	3
cg19463531	8.43153	6.83e-07	0.00256907	0.0968708	HYPER	chr4	619272	+		PDE6B;PDE6B	II			NA	NA	NA	NA	NA	NA	chr4:619513-619912	N_Shore	NM_001145291;NM_000283	TSS200;TSS200								PDE6B;PDE6B	ENST00000255622.6;ENST00000496514.1	TSS200;TSS200	PDE6B;PDE6B	ENST00000255622.6;ENST00000496514.1	TSS200;TSS200	chr4:618845-619435	3						TRUE
cg22392592	8.43059	6.84e-07	0.00256907	0.169884	HYPER	chr7	4266752	+	SDK1	SDK1;SDK1	II			NA	NA	NA	NA	NA	NA		OpenSea	NM_152744;NM_001079653	Body;Body								SDK1	ENST00000466611.1	TSS200	SDK1;SDK1	ENST00000466611.1;ENST00000476701.1	TSS200;5'UTR					chr7:4265905-4266834	6
cg10879843	8.42682	6.87e-07	0.00256907	0.151611	HYPER	chr7	47608299	-	TNS3	TNS3	II			NA	NA	NA	NA	NA	NA		OpenSea	NM_022748	5'UTR								TNS3	ENST00000311160.9	5'UTR	TNS3;TNS3	ENST00000434451.1;ENST00000311160.9	5'UTR;5'UTR	chr7:47608180-47608510	3
cg26982695	8.42569	6.89e-07	0.00256907	0.135553	HYPER	chr9	34591618	-			II			NA	NA	NA	NA	NA	NA	chr9:34589113-34591978	Island						TRUE	9:34578721-34581916						CNTFR	ENST00000417345.1	TSS1500	chr9:34589945-34591695	3						TRUE
cg17743250	-8.4234	6.91e-07	0.00256907	-0.589466	HYPO	chr10	94820927	-		CYP26C1	I	A	Red	NA	NA	NA	NA	NA	NA	chr10:94820026-94823252	Island	NM_183374	TSS200					10:94809776-94811385	10:94820882-94821041	Unclassified_Cell_type_specific	RP11-348J12.2;CYP26C1	ENST00000444965.1;ENST00000285949.5	TSS1500;TSS200	RP11-348J12.2;CYP26C1	ENST00000444965.1;ENST00000285949.5	TSS1500;TSS200	chr10:94820925-94821315	3						TRUE
cg21367476	8.41917	6.95e-07	0.00256907	0.181258	HYPER	chr2	231751162	-		LOC151484	II			NA	NA	NA	NA	NA	NA		OpenSea	NR_038238	TSS200				TRUE				AC012507.3;AC012507.3;AC012507.3;AC012507.3	ENST00000434807.1;ENST00000447074.1;ENST00000455128.1;ENST00000415628.1	TSS1500;TSS200;TSS200;TSS200	AC012507.3;AC012507.3;AC012507.3;AC012507.3	ENST00000434807.1;ENST00000447074.1;ENST00000455128.1;ENST00000415628.1	TSS1500;TSS200;TSS200;TSS200	chr2:231750945-231751195	3
cg13364082	8.41325	7.01e-07	0.00256907	0.146072	HYPER	chr10	46994040	-		GPRIN2	II			rs7084686	0.45	NA	NA	NA	NA	chr10:46992447-46993295	S_Shore	NM_014696	5'UTR								GPRIN2	ENST00000374317.1	TSS200	GPRIN2	ENST00000374317.1	TSS200	chr10:46993600-46994315	3
cg00935421	8.4132	7.01e-07	0.00256907	0.134369	HYPER	chr16	87991419	+	BANP	BANP;BANP	II			NA	NA	NA	NA	NA	NA	chr16:87991287-87991596	Island	NM_017869;NM_079837	5'UTR;5'UTR					16:86548805-86549090			BANP;BANP;BANP	ENST00000286122.7;ENST00000479780.2;ENST00000355022.4	5'UTR;5'UTR;5'UTR	BANP;BANP;BANP;BANP;BANP;BANP;BANP;BANP;BANP;BANP;BANP	ENST00000569400.1;ENST00000423252.1;ENST00000488074.1;ENST00000439677.1;ENST00000479780.2;ENST00000454563.1;ENST00000459966.1;ENST00000412691.1;ENST00000485772.1;ENST00000466197.1;ENST00000355022.4	5'UTR;5'UTR;5'UTR;5'UTR;5'UTR;5'UTR;5'UTR;5'UTR;5'UTR;5'UTR;5'UTR	chr16:87991145-87991515	3						TRUE
cg04236178	8.41071	7.03e-07	0.00256907	0.14796	HYPER	chr1	217310572	-	ESRRG	ESRRG	II			NA	NA	NA	NA	NA	NA	chr1:217310749-217311178	N_Shore	NM_001134285	5'UTR			CDMR		1:215376797-215377286			ESRRG;ESRRG	ENST00000493603.1;ENST00000366940.2	5'UTR;5'UTR	ESRRG;ESRRG	ENST00000493603.1;ENST00000366940.2	5'UTR;5'UTR	chr1:217310105-217311955	3						TRUE
cg13287964	-8.41061	7.03e-07	0.00256907	-0.251369	HYPO	chr18	77905751	+		LOC100130522;LOC100130522	II			NA	NA	NA	NA	NA	NA	chr18:77905297-77905566	S_Shore	NR_028339;NR_028340	TSS200;TSS200					18:76006690-76006793	18:77905301-77905944	Promoter_Associated_Cell_type_specific							chr18:77905640-77906775	3						TRUE
cg03711485	8.40362	7.1e-07	0.00257523	0.228006	HYPER	chr10	101296036	+	NKX2-3	NKX2-3	I	A	Red	NA	NA	NA	NA	NA	NA	chr10:101294443-101297263	Island	NM_145285	3'UTR			CDMR	TRUE	10:101284521-101286122			NKX2-3	ENST00000344586.7	3'UTR	NKX2-3	ENST00000344586.7	3'UTR	chr10:101295905-101297810	3						TRUE
cg08690999	-8.39917	7.15e-07	0.00257523	-0.513278	HYPO	chr5	92923396	-	NR2F1	NR2F1	II			NA	NA	NA	NA	NA	NA	chr5:92923487-92924497	N_Shore	NM_005654	Body			RDMR								NR2F1;NR2F1	ENST00000512697.1;ENST00000502982.1	5'UTR;5'UTR	chr5:92922965-92924170	3						TRUE
cg00452133	8.39912	7.15e-07	0.00257523	0.311293	HYPER	chr1	7308117	+	CAMTA1	CAMTA1	II			NA	NA	NA	NA	NA	NA		OpenSea	NM_015215	Body					1:7230599-7230733									chr1:7307960-7308190	3						TRUE
cg09826050	8.37595	7.39e-07	0.00264564	0.356678	HYPER	chr1	217310174	+	ESRRG	ESRRG	II			NA	NA	NA	NA	NA	NA	chr1:217310749-217311178	N_Shore	NM_001134285	5'UTR			CDMR		1:215376797-215377286			ESRRG;ESRRG	ENST00000493603.1;ENST00000366940.2	5'UTR;5'UTR	ESRRG;ESRRG	ENST00000493603.1;ENST00000366940.2	5'UTR;5'UTR	chr1:217310105-217311955	3						TRUE
cg03646261	8.3737	7.41e-07	0.00264564	0.192294	HYPER	chr2	45235408	-	SIX2	SIX2	II			NA	NA	NA	NA	NA	NA	chr2:45235511-45237792	N_Shore	NM_016932	Body														chr2:45234945-45236495	3						TRUE
cg19331423	-8.36593	7.5e-07	0.00266293	-0.191304	HYPO	chr9	2818246	+	KIAA0020	KIAA0020	II			rs116252517	0.01477	NA	NA	NA	NA		OpenSea	NM_014878	Body				TRUE										chr9:2818100-2818430	3
cg24930536	8.35932	7.57e-07	0.00266462	0.127647	HYPER	chr17	79615807	-			II			NA	NA	NA	NA	NA	NA	chr17:79614850-79615559	S_Shore							17:77226192-77226267						NPLOC4	ENST00000570300.1	TSS1500	chr17:79615645-79615815	3						TRUE
cg23719798	8.3546	7.62e-07	0.00266462	0.181495	HYPER	chr14	96131043	-	TCL6,RP11-1070N10.6	TCL6	II			NA	NA	NA	NA	NA	NA		OpenSea	NR_028288	Body						14:96130922-96131132	Unclassified_Cell_type_specific	TCL6;TCL6;TCL6;TCL6;TCL6;RP11-1070N10.6	ENST00000467865.1;ENST00000467865.1;ENST00000483087.1;ENST00000459662.1;ENST00000352367.6;ENST00000461160.1	1stExon;5'UTR;5'UTR;5'UTR;5'UTR;5'UTR	TCL6;TCL6;TCL6;TCL6;TCL6;TCL6;TCL6;TCL6;RP11-1070N10.6;RP11-1070N10.6	ENST00000484207.1;ENST00000484207.1;ENST00000467865.1;ENST00000486671.1;ENST00000357168.2;ENST00000483087.1;ENST00000459662.1;ENST00000497248.1;ENST00000461160.1;ENST00000553913.1	1stExon;5'UTR;5'UTR;TSS200;5'UTR;5'UTR;5'UTR;5'UTR;5'UTR;5'UTR	chr14:96130905-96131135	3
cg25508376	8.35295	7.64e-07	0.00266462	0.052047	HYPER	chr17	79094816	+	AATK	AATK	II			NA	NA	NA	NA	NA	NA	chr17:79093076-79096677	Island	NM_001080395	Body					17:76709232-76709778						AATK	ENST00000573469.1	3'UTR	chr17:79094425-79094915	3						TRUE
cg04801961	8.35284	7.64e-07	0.00266462	0.281373	HYPER	chr2	46017286	-	PRKCE	PRKCE	II			NA	NA	NA	NA	NA	NA		OpenSea	NM_005400	Body								PRKCE	ENST00000467135.1	5'UTR	PRKCE;PRKCE;PRKCE;PRKCE	ENST00000467135.1;ENST00000497602.1;ENST00000480453.1;ENST00000476675.1	5'UTR;5'UTR;5'UTR;5'UTR
cg25555128	8.34566	7.72e-07	0.00268008	0.2376	HYPER	chr1	212400040	-	RP11-15I11.3	LOC101929541;LOC101929541;LOC101929541	II			NA	NA	NA	NA	NA	NA		OpenSea	NR_125982;NR_125983;NR_125984	Body;Body;Body								RP11-15I11.3;RP11-15I11.3;RP11-15I11.3	ENST00000412221.1;ENST00000443448.1;ENST00000431307.1	TSS200;3'UTR;3'UTR	RP11-15I11.3;RP11-15I11.3;RP11-15I11.3	ENST00000412221.1;ENST00000443448.1;ENST00000431307.1	TSS200;3'UTR;3'UTR
cg10099524	8.33941	7.78e-07	0.00269138	0.0929682	HYPER	chr10	3153608	+	PFKP	PFKP;PFKP	II			NA	NA	NA	NA	NA	NA		OpenSea	NM_002627;NM_001242339	Body;Body																chr10:3152755-3153683	6	chr10:3152705-3156290	6
cg01322214	8.33436	7.84e-07	0.00269138	0.0896181	HYPER	chr7	25219198	-	C7orf31	C7orf31	II			NA	NA	NA	NA	NA	NA	chr7:25219408-25219962	N_Shore	NM_138811	5'UTR			CDMR			7:25218896-25220655	Promoter_Associated	C7orf31;C7orf31	ENST00000283905.3;ENST00000409280.1	5'UTR;5'UTR	C7orf31;C7orf31;C7orf31;C7orf31;C7orf31	ENST00000444434.1;ENST00000283905.3;ENST00000409280.1;ENST00000415598.1;ENST00000443822.1	5'UTR;5'UTR;5'UTR;5'UTR;TSS200	chr7:25218800-25219315	3						TRUE
cg06430772	8.33344	7.85e-07	0.00269138	0.340241	HYPER	chr2	236443508	-	AGAP1	AGAP1;AGAP1	II			NA	NA	NA	NA	NA	NA	chr2:236443815-236444025	N_Shore	NM_014914;NM_001037131	Body;Body				TRUE	2:236108078-236108248																TRUE
cg19088924	-8.33025	7.89e-07	0.00269187	-0.138677	HYPO	chr3	78233699	-			II			NA	NA	NA	NA	NA	NA		OpenSea						TRUE																	TRUE
cg09192412	-8.32264	7.97e-07	0.0027072	-0.1555	HYPO	chr4	110621006	-	CASP6	CASP6;CASP6	II			NA	NA	rs5030543	0.028133	rs5030543	0.028133	chr4:110623959-110624831	N_Shelf	NM_032992;NM_001226	Body;Body											CASP6	ENST00000503684.1	5'UTR	chr4:110620805-110621015	3						TRUE
cg23983453	-8.32019	8e-07	0.0027072	-0.547587	HYPO	chr5	92925524	+	NR2F1	NR2F1	II			NA	NA	NA	NA	NA	NA	chr5:92923487-92924497	S_Shore	NM_005654	Body			RDMR											chr5:92925065-92925955	3						TRUE
cg02082273	8.31261	8.09e-07	0.00272494	0.231719	HYPER	chr11	10473038	-	AMPD3	AMPD3	II			NA	NA	NA	NA	NA	NA	chr11:10472000-10472857	S_Shore	NM_000480	Body						11:10471854-10473364	Promoter_Associated_Cell_type_specific	AMPD3	ENST00000444303.2	5'UTR	AMPD3;AMPD3;AMPD3;AMPD3	ENST00000524866.1;ENST00000532250.1;ENST00000444303.2;ENST00000529835.1	5'UTR;5'UTR;5'UTR;5'UTR	chr11:10473005-10473415	3						TRUE
cg09413013	8.30598	8.17e-07	0.00273909	0.110272	HYPER	chr17	76137024	+	TMC8	TMC8	II			NA	NA	NA	NA	NA	NA	chr17:76136513-76137184	Island	NM_152468	Body					17:73648149-73648779	17:76136278-76137177	Gene_Associated							chr17:76136900-76137170	3						TRUE
cg03076094	8.29955	8.24e-07	0.00275263	0.0993426	HYPER	chr16	4357346	-			II			NA	NA	NA	NA	NA	NA	chr16:4357552-4357955	N_Shore						TRUE		16:4356326-4358296	Promoter_Associated							chr16:4357145-4358115	3						TRUE
cg02001060	-8.29255	8.32e-07	0.00276853	-0.240793	HYPO	chr11	108408962	-	EXPH5	EXPH5;EXPH5;EXPH5	II			NA	NA	NA	NA	NA	NA		OpenSea	NM_001144763;NM_015065;NM_001144765	Body;Body;TSS200								EXPH5;EXPH5	ENST00000439956.2;ENST00000443411.1	TSS200;TSS200	EXPH5;EXPH5	ENST00000439956.2;ENST00000443411.1	TSS200;TSS200	chr11:108408880-108409170	3						TRUE
cg06793050	8.28699	8.39e-07	0.00277887	0.240636	HYPER	chr21	36423674	-	RUNX1		II			NA	NA	NA	NA	NA	NA		OpenSea				chr21:36423642-36423642				21:36423222-36424371	Unclassified				RUNX1	ENST00000475045.1	3'UTR	chr21:36423625-36424155	3
cg01007169	8.28377	8.43e-07	0.00277997	0.384988	HYPER	chr5	135761383	-			II			NA	NA	NA	NA	NA	NA		OpenSea																				chr5:135760321-135761406	6
cg06098505	8.25685	8.76e-07	0.00287735	0.130627	HYPER	chr7	132436330	-			II			NA	NA	NA	NA	NA	NA		OpenSea						TRUE				SNORD46	ENST00000364139.1	TSS1500	SNORD46	ENST00000364139.1	TSS1500	chr7:132436280-132436430	3
cg13595412	8.24347	8.93e-07	0.00292098	0.243383	HYPER	chr16	80972085	-			II			NA	NA	NA	NA	NA	NA		OpenSea				chr16:80971971-80971971		TRUE										chr16:80971925-80972790	3
cg18118535	8.23621	9.03e-07	0.0029221	0.432473	HYPER	chr5	13943415	+	DNAH5	DNAH5	II			NA	NA	NA	NA	NA	NA		OpenSea	NM_001369	Body				TRUE																	TRUE
cg26294229	8.23523	9.04e-07	0.0029221	0.175247	HYPER	chr1	209799353	+	LAMB3	LAMB3;LAMB3;LAMB3	II			NA	NA	NA	NA	NA	NA	chr1:209799149-209799354	Island	NM_001017402;NM_001127641;NM_000228	Body;Body;Body								LAMB3	ENST00000391911.1	ExonBnd	LAMB3	ENST00000391911.1	ExonBnd	chr1:209799045-209799650	3						TRUE
cg25112366	8.23454	9.05e-07	0.0029221	0.0743772	HYPER	chr5	176170138	-			II			NA	NA	NA	NA	NA	NA	chr5:176170244-176170796	N_Shore						TRUE				RP11-375B1.3	ENST00000512115.1	TSS200	RP11-375B1.3	ENST00000512115.1	TSS200	chr5:176170125-176170275	3						TRUE
cg11748640	-8.22699	9.15e-07	0.00294193	-0.0729325	HYPO	chr19	5691196	+	RPL36	RPL36;RPL36	II			NA	NA	NA	NA	NA	NA	chr19:5690127-5692213	Island	NM_015414;NM_033643	Body;Body					19:5641031-5642844									chr19:5690400-5692715	3						TRUE
cg07889505	8.21568	9.3e-07	0.00296548	0.24535	HYPER	chr15	42349787	-			I	A	Red	rs776698	0.000832	NA	NA	NA	NA		OpenSea				chr15:42349424-42349424		TRUE	15:40136986-40137084	15:42348700-42350404	Unclassified							chr15:42349205-42349995	3						TRUE
cg16725127	8.21463	9.31e-07	0.00296548	0.151809	HYPER	chr20	542125	+			II			NA	NA	NA	NA	NA	NA		OpenSea								20:541430-543315	Unclassified											chr20:542037-542943	6
cg27000163	8.21295	9.33e-07	0.00296548	0.194102	HYPER	chr5	91633920	+	RP11-348J24.2		II			NA	NA	NA	NA	NA	NA		OpenSea										RP11-348J24.2;RP11-348J24.2	ENST00000507217.1;ENST00000502934.1	5'UTR;5'UTR	RP11-348J24.2;RP11-348J24.2	ENST00000507217.1;ENST00000502934.1	5'UTR;5'UTR	chr5:91633560-91634055	3
cg21958524	8.20706	9.41e-07	0.00297865	0.0697133	HYPER	chr12	99139867	-	ANKS1B	ANKS1B;ANKS1B;ANKS1B	II			NA	NA	NA	NA	NA	NA	chr12:99139386-99139769	S_Shore	NM_020140;NM_152788;NM_181670	Body;Body;Body			DMR			12:99139311-99139893	Unclassified_Cell_type_specific	ANKS1B	ENST00000546541.1	3'UTR	ANKS1B;ANKS1B;ANKS1B	ENST00000551212.1;ENST00000546541.1;ENST00000547362.1	TSS1500;3'UTR;3'UTR	chr12:99139220-99139975	3						TRUE
cg08962271	8.20336	9.46e-07	0.00298255	0.145722	HYPER	chr11	67273496	-	PITPNM1	PITPNM1;PITPNM1	II			NA	NA	NA	NA	NA	NA	chr11:67275067-67276431	N_Shore	NM_004910;NM_001130848	TSS1500;TSS1500						11:67273463-67273920	Promoter_Associated	PITPNM1;PITPNM1	ENST00000436757.2;ENST00000356404.3	TSS1500;TSS1500	PITPNM1;PITPNM1;PITPNM1;PITPNM1;PITPNM1;PITPNM1;PITPNM1	ENST00000524901.1;ENST00000527527.1;ENST00000527103.1;ENST00000436757.2;ENST00000356404.3;ENST00000528559.1;ENST00000532703.1	TSS1500;TSS1500;TSS1500;TSS1500;TSS1500;5'UTR;TSS1500	chr11:67271065-67273855	3						TRUE
cg16131257	-8.19879	9.53e-07	0.00299022	-0.228768	HYPO	chr15	67212075	+			II			rs112446172	0.017841	NA	NA	NA	NA		OpenSea										RP11-798K3.4	ENST00000559904.1	TSS200	RP11-798K3.4	ENST00000559904.1	TSS200	chr15:67211805-67212115	3
cg02861821	8.18873	9.67e-07	0.00301893	0.299248	HYPER	chr14	69966449	-	PLEKHD1	PLEKHD1	II			rs17836248	0.138113	NA	NA	NA	NA		OpenSea	NM_001161498	Body											PLEKHD1	ENST00000556123.1	5'UTR	chr14:69966265-69966755	3
cg18696576	8.18514	9.72e-07	0.00301893	0.171296	HYPER	chr6	34203630	-		HMGA1;HMGA1;HMGA1;HMGA1;HMGA1	I	A	Red	NA	NA	NA	NA	NA	NA	chr6:34202567-34206193	Island	NM_145899;NM_145902;NM_145901;NM_145903;NM_002131	TSS1500;TSS1500;TSS1500;TSS1500;TSS1500					6:34310546-34311979	6:34203515-34203817	Promoter_Associated	HMGA1;HMGA1;HMGA1;HMGA1	ENST00000401473.2;ENST00000447654.1;ENST00000395004.3;ENST00000478214.1	TSS1500;TSS1500;TSS1500;TSS1500	HMGA1;HMGA1;HMGA1;HMGA1	ENST00000401473.2;ENST00000447654.1;ENST00000395004.3;ENST00000478214.1	TSS1500;TSS1500;TSS1500;TSS1500	chr6:34203380-34203815	3						TRUE
cg18588266	-8.1839	9.73e-07	0.00301893	-0.203752	HYPO	chr14	56229661	+	RP11-813I20.2		II			NA	NA	NA	NA	NA	NA	chr14:56232945-56233281	N_Shelf										RP11-813I20.2	ENST00000554458.1	5'UTR	RP11-813I20.2	ENST00000554458.1	5'UTR	chr14:56229480-56229775	3						TRUE
cg02140542	8.17857	9.81e-07	0.00303025	0.108731	HYPER	chr8	145748901	-	LRRC14,LRRC24	LRRC14;LRRC14;LRRC24	II			rs113823213	0.02332	NA	NA	NA	NA	chr8:145747509-145748682	S_Shore	NM_001272036;NM_014665;NM_001024678	3'UTR;3'UTR;Body						8:145748277-145749426	Promoter_Associated	LRRC14;LRRC14	ENST00000292524.1;ENST00000528528.1	3'UTR;5'UTR	LRRC14;LRRC14;LRRC14;LRRC14	ENST00000292524.1;ENST00000528528.1;ENST00000530242.1;ENST00000529995.1	3'UTR;5'UTR;5'UTR;TSS200			chr8:145721049-145756539	6	chr8:145745587-145755077	6
cg12251227	-8.16887	9.95e-07	0.00305926	-0.345969	HYPO	chr3	177801821	+			II			NA	NA	NA	NA	NA	NA		OpenSea																chr3:177801600-177802330	3
cg27175024	8.16655	9.98e-07	0.00305926	0.225363	HYPER	chr10	43393209	+			I	C	Grn	NA	NA	NA	NA	NA	NA	chr10:43393476-43394417	N_Shore					RDMR		10:42713170-42714555									chr10:43392965-43393395	3						TRUE
cg00569091	8.15988	1.01e-06	0.00307538	0.228654	HYPER	chr1	8424793	+	RERE	RERE;RERE;RERE	I	T	Red	NA	NA	NA	NA	NA	NA		OpenSea	NM_001042682;NM_012102;NM_001042681	5'UTR;Body;Body				TRUE		1:8424698-8424876	Unclassified_Cell_type_specific	RERE;RERE	ENST00000337907.3;ENST00000476556.1	ExonBnd;5'UTR	RERE;RERE;RERE;RERE	ENST00000464367.1;ENST00000337907.3;ENST00000488215.1;ENST00000476556.1	3'UTR;ExonBnd;3'UTR;5'UTR	chr1:8424560-8424915	3						TRUE
cg23830619	-8.15753	1.01e-06	0.00307538	-0.341881	HYPO	chr12	1868080	+	ADIPOR2	ADIPOR2	II			NA	NA	NA	NA	NA	NA		OpenSea	NM_024551	Body											ADIPOR2	ENST00000537545.1	5'UTR	chr12:1868060-1868375	3
cg25910803	8.15349	1.02e-06	0.00308143	0.126642	HYPER	chr17	26732249	-	SLC46A1	SLC46A1	I	C	Grn	NA	NA	NA	NA	NA	NA	chr17:26732175-26732391	Island	NM_080669	Body					17:23756303-23756572									chr17:26731925-26732495	3						TRUE
cg18215449	-8.13809	1.04e-06	0.00313889	-0.152671	HYPO	chr12	66089473	+			II			NA	NA	NA	NA	NA	NA		OpenSea				chr12:66089335-66089335		TRUE										chr12:66089180-66089675	3						TRUE
cg14346095	8.13062	1.05e-06	0.0031501	0.211207	HYPER	chr17	76949832	-			II			NA	NA	NA	NA	NA	NA		OpenSea																chr17:76949685-76949975	3
cg01399317	8.12087	1.07e-06	0.0031501	0.331334	HYPER	chr8	144810339	-	FAM83H	FAM83H	I	C	Grn	rs28573699	0.059824	NA	NA	NA	NA	chr8:144808221-144810978	Island	NM_198488	Body					8:144879781-144883419	8:144808961-144810594	Unclassified_Cell_type_specific				FAM83H	ENST00000395103.2	1stExon	chr8:144810085-144812055	3					TRUE	TRUE
cg25925441	8.11841	1.07e-06	0.0031501	0.201538	HYPER	chr2	154336045	+	AC012501.2	RPRM	II			NA	NA	NA	NA	NA	NA	chr2:154334449-154335458	S_Shore	NM_019845	TSS1500		chr2:154335936-154335936						RPRM;AC012501.2	ENST00000325926.3;ENST00000424322.1	TSS1500;3'UTR	RPRM;AC012501.2	ENST00000325926.3;ENST00000424322.1	TSS1500;3'UTR	chr2:154335945-154336315	3						TRUE
cg07697428	8.11623	1.07e-06	0.0031501	0.297746	HYPER	chr17	4079341	-	CYB5D2,ANKFY1	ANKFY1	I	C	Grn	rs77336211	0.026042	NA	NA	NA	NA		OpenSea	NM_016376	Body					17:4026011-4026091	17:4079161-4080396	Promoter_Associated_Cell_type_specific				ANKFY1	ENST00000572412.1	3'UTR	chr17:4079140-4079395	3						TRUE
cg11043520	8.11207	1.08e-06	0.0031501	0.346769	HYPER	chr13	26596903	+	ATP8A2		II			rs2057571	0.045477	NA	NA	NA	NA		OpenSea										ATP8A2	ENST00000381655.2	3'UTR	ATP8A2	ENST00000381655.2	3'UTR	chr13:26596625-26597255	3
cg10796749	8.11203	1.08e-06	0.0031501	0.198797	HYPER	chr1	10056837	+		RBP7	I	C	Grn	NA	NA	NA	NA	NA	NA	chr1:10057121-10058108	N_Shore	NM_052960	TSS1500						1:10056457-10058087	Unclassified_Cell_type_specific	RBP7;RBP7	ENST00000315901.3;ENST00000294435.7	TSS1500;TSS1500	RBP7;RBP7	ENST00000315901.3;ENST00000294435.7	TSS1500;TSS1500	chr1:10056445-10058135	3						TRUE
cg12705340	8.11087	1.08e-06	0.0031501	0.103026	HYPER	chr3	38070342	+	PLCD1	PLCD1	I	A	Red	NA	NA	NA	NA	NA	NA	chr3:38070394-38071598	N_Shore	NM_006225	Body						3:38070301-38072091	Unclassified				PLCD1	ENST00000461445.1	3'UTR	chr3:38069985-38071575	3						TRUE
cg14951292	8.10766	1.09e-06	0.0031501	0.172311	HYPER	chr16	4525986	+	NMRAL1,HMOX2	HMOX2;HMOX2;HMOX2;NMRAL1	II			NA	NA	NA	NA	NA	NA	chr16:4526295-4526927	N_Shore	NM_001127204;NM_002134;NM_001127206;NM_020677	TSS1500;TSS1500;5'UTR;TSS1500						16:4525913-4527244	Promoter_Associated	NMRAL1;NMRAL1;HMOX2;NMRAL1;HMOX2;HMOX2;HMOX2;NMRAL1;HMOX2;HMOX2;HMOX2	ENST00000574733.1;ENST00000404295.3;ENST00000458134.3;ENST00000574425.1;ENST00000219700.6;ENST00000575120.1;ENST00000574594.1;ENST00000283429.6;ENST00000570646.1;ENST00000406590.2;ENST00000570646.1	5'UTR;TSS1500;TSS1500;TSS1500;TSS1500;TSS1500;TSS1500;TSS1500;1stExon;5'UTR;5'UTR	NMRAL1;NMRAL1;NMRAL1;NMRAL1;NMRAL1;NMRAL1;NMRAL1;HMOX2;NMRAL1;NMRAL1;HMOX2;HMOX2;HMOX2;HMOX2;HMOX2;HMOX2;NMRAL1;HMOX2;NMRAL1;HMOX2;HMOX2;HMOX2	ENST00000571291.1;ENST00000574733.1;ENST00000573571.1;ENST00000575557.1;ENST00000575995.1;ENST00000404295.3;ENST00000575002.1;ENST00000458134.3;ENST00000574425.1;ENST00000573520.1;ENST00000219700.6;ENST00000575120.1;ENST00000572812.1;ENST00000576827.1;ENST00000574594.1;ENST00000570445.1;ENST00000283429.6;ENST00000570646.1;ENST00000572559.1;ENST00000575051.1;ENST00000406590.2;ENST00000570646.1	5'UTR;5'UTR;TSS1500;TSS1500;TSS1500;TSS1500;TSS1500;TSS1500;TSS1500;TSS1500;TSS1500;TSS1500;TSS1500;TSS1500;TSS1500;TSS1500;TSS1500;1stExon;3'UTR;5'UTR;5'UTR;5'UTR	chr16:4525985-4526515	3					TRUE	TRUE
cg00902427	8.10738	1.09e-06	0.0031501	0.216868	HYPER	chr22	41074991	-	MCHR1	MCHR1	II			rs41281279	0.010522	NA	NA	NA	NA		OpenSea	NM_005297	TSS200								MCHR1;MCHR1;MCHR1	ENST00000249016.4;ENST00000249016.4;ENST00000381433.2	5'UTR;1stExon;TSS1500	MCHR1;MCHR1;MCHR1;MCHR1	ENST00000249016.4;ENST00000249016.4;ENST00000381433.2;ENST00000465662.1	5'UTR;1stExon;TSS1500;TSS1500	chr22:41074485-41075035	3						TRUE
cg08939976	8.10624	1.09e-06	0.0031501	0.136814	HYPER	chr16	72912494	-	ZFHX3	ZFHX3;ZFHX3	II			NA	NA	NA	NA	NA	NA		OpenSea	NM_001164766;NM_006885	Body;Body		chr16:72912475-72912475									ZFHX3	ENST00000563625.1	3'UTR	chr16:72912200-72912715	3
cg04719462	8.09958	1.1e-06	0.0031501	0.198229	HYPER	chr17	26221590	-	LYRM9	LYRM9	II			NA	NA	NA	NA	NA	NA	chr17:26219938-26220475	S_Shore	NM_001076680	TSS1500				TRUE				C17orf108;C17orf108	ENST00000460380.1;ENST00000379102.3	TSS1500;TSS1500	C17orf108;C17orf108	ENST00000460380.1;ENST00000508862.1	TSS1500;TSS1500
cg09011891	8.09792	1.1e-06	0.0031501	0.29666	HYPER	chr5	134526752	-	C5orf66		II			NA	NA	NA	NA	NA	NA	chr5:134526927-134527419	N_Shore					CDMR		5:134554645-134555304	5:134526707-134528106	Unclassified	CTC-203F4.1;CTC-349C3.1	ENST00000432382.3;ENST00000505828.1	5'UTR;5'UTR	CTC-203F4.1;CTC-349C3.1	ENST00000432382.3;ENST00000505828.1	5'UTR;5'UTR	chr5:134526745-134527075	3						TRUE
cg00447970	8.09502	1.11e-06	0.0031501	0.0689159	HYPER	chr17	29719431	-	RAB11FIP4	RAB11FIP4	I	A	Red	NA	NA	NA	NA	NA	NA	chr17:29718230-29719291	S_Shore	NM_032932	Body					17:26742002-26743580	17:29718186-29719607	Unclassified_Cell_type_specific							chr17:29719145-29719855	3						TRUE
cg14529732	8.09473	1.11e-06	0.0031501	0.155444	HYPER	chr22	43306564	-	PACSIN2	PACSIN2;PACSIN2;PACSIN2	II			rs2267470	0.439429	NA	NA	NA	NA		OpenSea	NM_001184971;NM_001184970;NM_007229	Body;Body;Body																		chr22:43306558-43306965	6
cg23906067	8.0935	1.11e-06	0.0031501	0.163899	HYPER	chr6	31939112	+	DXO,STK19	STK19;STK19;DOM3Z;STK19	II			NA	NA	NA	NA	NA	NA	chr6:31939730-31940559	N_Shore	NM_032454;NM_004197;NM_005510;NR_026717	TSS1500;TSS1500;Body;Body					6:32046826-32047302			DOM3Z;STK19;STK19;XXbac-BPG116M5.15;DOM3Z;DOM3Z	ENST00000478221.1;ENST00000375331.2;ENST00000375333.2;ENST00000519179.1;ENST00000337523.5;ENST00000375356.3	3'UTR;TSS1500;TSS1500;TSS1500;ExonBnd;1stExon	DOM3Z;DOM3Z;DOM3Z;DOM3Z;DOM3Z;DOM3Z;DOM3Z;STK19;STK19;DOM3Z;STK19;DOM3Z;DOM3Z;STK19;STK19;STK19;STK19;STK19;DOM3Z;STK19;STK19;STK19;STK19;DOM3Z;STK19;DOM3Z;DOM3Z;DOM3Z;DOM3Z;DOM3Z;DOM3Z;DOM3Z;STK19	ENST00000491327.1;ENST00000485557.1;ENST00000477826.1;ENST00000473976.1;ENST00000478221.1;ENST00000498357.1;ENST00000474587.1;ENST00000479644.1;ENST00000492583.1;ENST00000492946.1;ENST00000375333.2;ENST00000477826.1;ENST00000487914.1;ENST00000473983.1;ENST00000478486.1;ENST00000463823.1;ENST00000483801.1;ENST00000466336.1;ENST00000460058.1;ENST00000471028.1;ENST00000491861.1;ENST00000484540.1;ENS…	3'UTR;3'UTR;3'UTR;3'UTR;3'UTR;3'UTR;3'UTR;TSS1500;TSS1500;3'UTR;TSS1500;1stExon;3'UTR;TSS1500;TSS1500;TSS1500;TSS1500;TSS1500;3'UTR;TSS1500;TSS1500;TSS1500;TSS1500;TSS1500;5'UTR;ExonBnd;1stExon;1stExon;1stExon;1stExon;1stExon;1stExon;5'UTR	chr6:31938700-31939175	3						TRUE
cg11885741	8.09322	1.11e-06	0.0031501	0.235767	HYPER	chr10	134980986	+	KNDC1	KNDC1	I	C	Grn	NA	NA	NA	NA	NA	NA	chr10:134980302-134981059	Island	NM_152643	Body					10:134830078-134831483			KNDC1	ENST00000368571.2	1stExon	KNDC1;KNDC1;KNDC1;KNDC1;KNDC1	ENST00000478074.1;ENST00000368571.2;ENST00000485110.1;ENST00000530127.1;ENST00000465195.1	5'UTR;1stExon;5'UTR;5'UTR;5'UTR	chr10:134980825-134981675	3
cg10935889	8.08757	1.12e-06	0.0031501	0.156279	HYPER	chr3	123603624	-		MYLK;MYLK;MYLK;MYLK	II			NA	NA	NA	NA	NA	NA	chr3:123602588-123603540	S_Shore	NM_053025;NM_053026;NM_053028;NM_053027	TSS1500;TSS1500;TSS1500;TSS1500								MYLK;MYLK;MYLK	ENST00000359169.1;ENST00000346322.5;ENST00000360772.3	TSS1500;TSS1500;TSS1500	MYLK;MYLK;MYLK;MYLK	ENST00000359169.1;ENST00000464489.1;ENST00000346322.5;ENST00000360772.3	TSS1500;TSS1500;TSS1500;TSS1500	chr3:123603045-123603795	3
cg22119921	8.0855	1.12e-06	0.0031501	0.134787	HYPER	chr2	242449049	+	STK25	STK25;STK25;STK25;STK25;STK25;STK25;STK25;STK25;STK25	II			NA	NA	NA	NA	NA	NA	chr2:242447017-242448558	S_Shore	NM_001271978;NM_001271980;NM_001271979;NM_001271977;NM_001282306;NM_006374;NM_001282308;NM_001282307;NM_001282305	TSS1500;TSS1500;TSS1500;TSS1500;TSS1500;TSS1500;TSS1500;TSS1500;TSS200								STK25;STK25;STK25;STK25;STK25;STK25;STK25;STK25	ENST00000401869.1;ENST00000405883.3;ENST00000405585.1;ENST00000545437.1;ENST00000535007.1;ENST00000403346.3;ENST00000316586.4;ENST00000543554.1	TSS1500;TSS1500;TSS1500;TSS1500;TSS1500;TSS1500;TSS1500;TSS200	STK25;STK25;STK25;STK25;STK25;STK25;STK25;STK25;STK25;STK25;STK25;STK25;STK25;STK25;STK25;STK25;STK25;STK25;STK25;STK25	ENST00000440109.1;ENST00000439101.1;ENST00000424537.1;ENST00000401869.1;ENST00000405883.3;ENST00000452891.1;ENST00000436917.1;ENST00000495372.1;ENST00000405585.1;ENST00000420551.1;ENST00000545437.1;ENST00000535007.1;ENST00000483603.1;ENST00000442307.1;ENST00000403346.3;ENST00000316586.4;ENST00000440109.1;ENST00000461760.1;ENST00000413760.1;ENST00000543554.1	5'UTR;TSS1500;TSS1500;TSS1500;TSS1500;TSS1500;TSS1500;TSS1500;TSS1500;TSS1500;TSS1500;TSS1500;TSS1500;TSS1500;TSS1500;TSS1500;1stExon;TSS1500;TSS1500;TSS200			chr2:242446210-242449234	6	chr2:242446256-242449191	6
cg12166662	8.08491	1.12e-06	0.0031501	0.366403	HYPER	chr5	92906851	+	NR2F1-AS1	FLJ42709;FLJ42709;FLJ42709	II			rs191817583	0.0124	NA	NA	NA	NA	chr5:92906239-92908875	Island	NR_015369;NR_021490;NR_021491	TSS1500;Body;Body					5:92931903-92933043			RP11-65F13.2	ENST00000504474.1	3'UTR	RP11-65F13.2;RP11-65F13.2;RP11-65F13.2;RP11-65F13.2;RP11-65F13.2	ENST00000504474.1;ENST00000503134.1;ENST00000507963.1;ENST00000513055.1;ENST00000510254.1	3'UTR;3'UTR;3'UTR;3'UTR;3'UTR	chr5:92906765-92907275	3						TRUE
cg26863308	8.08451	1.12e-06	0.0031501	0.125029	HYPER	chr11	119040090	+	NLRX1	NLRX1;NLRX1	II			NA	NA	NA	NA	NA	NA	chr11:119039429-119039944	S_Shore	NM_170722;NM_024618	5'UTR;5'UTR						11:119038965-119040439	Promoter_Associated	NLRX1;NLRX1;NLRX1;NLRX1;NLRX1	ENST00000409991.1;ENST00000292199.2;ENST00000409265.4;ENST00000409109.1;ENST00000397884.1	5'UTR;5'UTR;5'UTR;5'UTR;5'UTR	NLRX1;NLRX1;NLRX1;NLRX1;NLRX1;NLRX1;NLRX1;NLRX1;NLRX1;NLRX1;NLRX1;NLRX1	ENST00000482180.1;ENST00000454811.1;ENST00000449394.1;ENST00000422249.1;ENST00000474751.2;ENST00000409991.1;ENST00000292199.2;ENST00000409265.4;ENST00000409109.1;ENST00000468765.1;ENST00000397884.1;ENST00000481860.2	5'UTR;5'UTR;5'UTR;5'UTR;5'UTR;5'UTR;5'UTR;5'UTR;5'UTR;5'UTR;5'UTR;5'UTR	chr11:119039280-119040415	3						TRUE
cg15365218	8.08087	1.13e-06	0.0031538	0.141723	HYPER	chr11	33396859	+			II			NA	NA	NA	NA	NA	NA	chr11:33397607-33398494	N_Shore							11:33353401-33353730																TRUE
cg03424844	-8.07881	1.13e-06	0.0031538	-0.238641	HYPO	chr1	184641175	+			II			NA	NA	NA	NA	NA	NA		OpenSea						TRUE										chr1:184641125-184641475	3						TRUE
cg00318864	-8.07378	1.14e-06	0.00316577	-0.398968	HYPO	chr12	40959322	+	MUC19	MUC19;MUC19	II			NA	NA	NA	NA	NA	NA		OpenSea	NM_173600;NM_173600	ExonBnd;Body								MUC19;MUC19;MUC19	ENST00000538912.1;ENST00000538912.1;ENST00000454784.2	ExonBnd;3'UTR;5'UTR	MUC19;MUC19;MUC19;MUC19;MUC19	ENST00000538912.1;ENST00000380816.3;ENST00000460785.1;ENST00000538912.1;ENST00000454784.2	ExonBnd;ExonBnd;5'UTR;3'UTR;5'UTR	chr12:40959140-40959350	3
cg09955097	8.07072	1.15e-06	0.00316866	0.124931	HYPER	chr16	70725120	-	VAC14	VAC14	II			NA	NA	NA	NA	NA	NA		OpenSea	NM_018052	Body								VAC14	ENST00000571759.1	TSS200	VAC14;VAC14;VAC14;VAC14;VAC14	ENST00000567648.1;ENST00000571759.1;ENST00000568886.1;ENST00000564512.1;ENST00000568548.1	3'UTR;TSS200;3'UTR;3'UTR;3'UTR	chr16:70725040-70725395	3
cg06568565	-8.06398	1.16e-06	0.00317032	-0.252157	HYPO	chr12	109304203	+		SVOP	II			NA	NA	NA	NA	NA	NA		OpenSea	NM_018711	3'UTR								RP11-423G4.7	ENST00000569754.1	TSS1500	RP11-423G4.7	ENST00000569754.1	TSS1500	chr12:109304045-109304435	3
cg26610808	8.06362	1.16e-06	0.00317032	0.139613	HYPER	chr10	102046685	+		BLOC1S2;BLOC1S2	II			NA	NA	NA	NA	NA	NA	chr10:102046142-102046632	S_Shore	NM_173809;NM_001001342	TSS1500;TSS1500						10:102045499-102047347	Promoter_Associated	BLOC1S2;BLOC1S2;BLOC1S2	ENST00000361832.1;ENST00000370372.1;ENST00000358848.1	TSS1500;TSS1500;TSS1500	BLOC1S2;BLOC1S2;BLOC1S2	ENST00000361832.1;ENST00000370372.1;ENST00000358848.1	TSS1500;TSS1500;TSS1500	chr10:102046360-102046895	3					TRUE	TRUE
cg20467412	8.06192	1.16e-06	0.00317032	0.134699	HYPER	chr19	5799340	-			I	A	Red	rs148925833	0.011	NA	NA	NA	NA	chr19:5799289-5799542	Island																chr19:5799145-5799750	3						TRUE
cg00549412	8.05777	1.17e-06	0.00317032	0.145087	HYPER	chr21	43933482	+	SLC37A1	SLC37A1	II			NA	NA	NA	NA	NA	NA	chr21:43933589-43934832	N_Shore	NM_018964	5'UTR					21:42806487-42807901	21:43933463-43934833	Promoter_Associated_Cell_type_specific	SLC37A1;SLC37A1;SLC37A1	ENST00000471277.1;ENST00000352133.2;ENST00000398341.3	TSS1500;TSS1500;5'UTR	SLC37A1;SLC37A1;SLC37A1;SLC37A1;SLC37A1	ENST00000471277.1;ENST00000352133.2;ENST00000398343.2;ENST00000419522.1;ENST00000398341.3	TSS1500;TSS1500;TSS1500;5'UTR;5'UTR	chr21:43933265-43935055	3						TRUE
cg19775672	8.05647	1.17e-06	0.00317032	0.0952444	HYPER	chr4	7104195	+	RP11-367J11.3	FLJ36777	II			NA	NA	NA	NA	NA	NA		OpenSea	NR_027441	Body						4:7103442-7105811	Promoter_Associated	RP11-367J11.3;RP11-367J11.4	ENST00000499242.2;ENST00000501888.2	3'UTR;1stExon	RP11-367J11.3;RP11-367J11.3;RP11-367J11.4	ENST00000504402.1;ENST00000499242.2;ENST00000501888.2	3'UTR;3'UTR;1stExon	chr4:7103780-7104255	3						TRUE
cg15842568	8.05491	1.17e-06	0.00317032	0.369848	HYPER	chr19	4045064	-	ZBTB7A		I	A	Red	NA	NA	NA	NA	NA	NA	chr19:4044917-4045154	Island						TRUE	19:3995950-3996190									chr19:4045025-4045515	3						TRUE
cg09683650	-8.05364	1.18e-06	0.00317032	-0.202418	HYPO	chr8	70376685	+			II			NA	NA	NA	NA	NA	NA		OpenSea																chr8:70376605-70376870	3
cg07507481	8.0481	1.19e-06	0.00318513	0.0503473	HYPER	chr20	49923279	+			II			rs16995893	0.016387	NA	NA	NA	NA		OpenSea								20:49922942-49924314	Unclassified							chr20:49923105-49923330	3
cg09195408	8.04059	1.2e-06	0.00319749	0.378973	HYPER	chr3	72373233	-			II			NA	NA	NA	NA	NA	NA		OpenSea										RP11-447M4.1	ENST00000570082.1	TSS200	RP11-447M4.1	ENST00000570082.1	TSS200	chr3:72372985-72373275	3
cg17164249	-8.03989	1.2e-06	0.00319749	-0.140516	HYPO	chr21	16805446	+			II			rs2823273	0.051049	NA	NA	NA	NA		OpenSea																chr21:16805400-16805635	3
cg15648081	8.03537	1.21e-06	0.00319749	0.184019	HYPER	chr6	21271785	+			II			rs55951222	0.039191	NA	NA	NA	NA		OpenSea																chr6:21271745-21271950	3
cg12737475	8.03427	1.21e-06	0.00319749	0.167777	HYPER	chr14	99667340	-	BCL11B	BCL11B;BCL11B;BCL11B;BCL11B	II			NA	NA	NA	NA	NA	NA		OpenSea	NM_022898;NM_001282238;NM_001282237;NM_138576	Body;Body;Body;Body														chr14:99667005-99667355	3
cg17063565	-8.03381	1.21e-06	0.00319749	-0.421522	HYPO	chr18	24878417	+			II			NA	NA	NA	NA	NA	NA		OpenSea																		chr18:24878349-24878826	6	chr18:24878071-24878921	6
cg23305899	8.01937	1.24e-06	0.00325462	0.390089	HYPER	chr14	101539489	+			I	T	Red	NA	NA	NA	NA	NA	NA		OpenSea						TRUE	14:100609113-100609405									chr14:101538645-101539935	3						TRUE
cg16240781	8.01582	1.24e-06	0.00325462	0.161422	HYPER	chr2	45234379	+	SIX2	SIX2	II			NA	NA	NA	NA	NA	NA	chr2:45235511-45237792	N_Shore	NM_016932	Body														chr2:45233905-45234875	3						TRUE
cg21601160	8.01484	1.25e-06	0.00325462	0.10907	HYPER	chr12	100592895	+	RP11-175P13.3	ACTR6	II			NA	NA	NA	NA	NA	NA	chr12:100594486-100594799	N_Shore	NM_022496	TSS1500								ACTR6	ENST00000188312.2	TSS1500	ACTR6;ACTR6;ACTR6;RP11-175P13.3	ENST00000553038.1;ENST00000188312.2;ENST00000551652.1;ENST00000550096.1	TSS1500;TSS1500;TSS200;3'UTR	chr12:100592825-100593930	3
cg00997626	-8.0113	1.25e-06	0.00326065	-0.510991	HYPO	chr4	1798747	-	FGFR3	FGFR3;FGFR3;FGFR3	II			rs743683	0.079669	NA	NA	NA	NA	chr4:1800144-1800351	N_Shore	NM_000142;NM_022965;NM_001163213	Body;Body;Body																chr4:1793550-1813500	6	chr4:1793893-1809516	6
cg25869970	8.0045	1.26e-06	0.00327457	0.228649	HYPER	chr12	53455478	-	TENC1	TNS2;TNS2;TNS2	II			NA	NA	NA	NA	NA	NA		OpenSea	NM_198316;NM_015319;NM_170754	Body;Body;Body				TRUE		12:53455203-53456252	Unclassified				TENC1;TENC1;TENC1;TENC1;TENC1;TENC1	ENST00000549311.1;ENST00000546772.1;ENST00000550048.1;ENST00000552168.1;ENST00000550660.1;ENST00000550660.1	3'UTR;3'UTR;TSS1500;TSS200;1stExon;5'UTR	chr12:53454725-53455835	3
cg13973086	8.00387	1.27e-06	0.00327457	0.337714	HYPER	chr2	469105	-			I	A	Red	NA	NA	NA	NA	NA	NA	chr2:467849-468659	S_Shore							2:459079-459215									chr2:469025-469215	3						TRUE
cg02687548	8.0006	1.27e-06	0.00327947	0.144455	HYPER	chr1	44006614	-	PTPRF	PTPRF;PTPRF	II			NA	NA	NA	NA	NA	NA		OpenSea	NM_130440;NM_002840	5'UTR;5'UTR								PTPRF;PTPRF	ENST00000359947.4;ENST00000438120.1	5'UTR;5'UTR	PTPRF;PTPRF;PTPRF;PTPRF;PTPRF;PTPRF	ENST00000496043.1;ENST00000481019.1;ENST00000359947.4;ENST00000438120.1;ENST00000436724.1;ENST00000372405.1	5'UTR;5'UTR;5'UTR;5'UTR;5'UTR;5'UTR	chr1:44006365-44006795	3
cg05583608	7.99708	1.28e-06	0.00328122	0.134437	HYPER	chr16	51147536	-			I	C	Grn	NA	NA	NA	NA	NA	NA	chr16:51147490-51147944	Island						TRUE	16:49704962-49705038									chr16:51147445-51147595	3						TRUE
cg12339790	-7.99576	1.28e-06	0.00328122	-0.237639	HYPO	chr15	78582096	-	WDR61	WDR61;WDR61;WDR61	II			NA	NA	NA	NA	NA	NA		OpenSea	NM_025234;NM_001303247;NM_001303248	Body;Body;Body											WDR61;WDR61	ENST00000560610.1;ENST00000558453.1	3'UTR;TSS200	chr15:78582060-78582255	3
cg24877842	7.98756	1.3e-06	0.00331013	0.21176	HYPER	chr3	42201898	+	TRAK1	TRAK1;TRAK1	II			NA	NA	NA	NA	NA	NA		OpenSea	NM_014965;NM_001042646	1stExon;Body				TRUE				TRAK1;TRAK1	ENST00000341421.3;ENST00000487159.1	1stExon;5'UTR	TRAK1;TRAK1;TRAK1;TRAK1;TRAK1;TRAK1	ENST00000341421.3;ENST00000469506.2;ENST00000487159.1;ENST00000484786.1;ENST00000418790.1;ENST00000469506.2	1stExon;1stExon;5'UTR;5'UTR;3'UTR;5'UTR	chr3:42201805-42202050	3					TRUE	TRUE
cg20359042	7.98326	1.3e-06	0.00332027	0.324879	HYPER	chr13	99135583	-	STK24	STK24;STK24	I	A	Red	NA	NA	NA	NA	NA	NA		OpenSea	NM_003576;NM_001032296	Body;Body		chr13:99135278-99135278			13:97933544-97933627			STK24	ENST00000376541.3	5'UTR	STK24;STK24	ENST00000491878.1;ENST00000376541.3	3'UTR;5'UTR	chr13:99134725-99135675	3						TRUE
cg07704786	7.97499	1.32e-06	0.00334997	0.234369	HYPER	chr7	90794589	-	CDK14	CDK14;CDK14;CDK14;CDK14	II			NA	NA	NA	NA	NA	NA		OpenSea	NM_012395;NM_001287137;NM_001287136;NM_001287135	3'UTR;3'UTR;3'UTR;3'UTR				TRUE				CDK14;CDK14;CDK14;CDK14	ENST00000436577.2;ENST00000406263.1;ENST00000265741.3;ENST00000380050.3	3'UTR;3'UTR;3'UTR;3'UTR	CDK14;CDK14;CDK14;CDK14	ENST00000436577.2;ENST00000406263.1;ENST00000265741.3;ENST00000380050.3	3'UTR;3'UTR;3'UTR;3'UTR	chr7:90794305-90794590	3
cg05219493	-7.96991	1.33e-06	0.0033642	-0.482219	HYPO	chr10	94820923	-		CYP26C1	II			NA	NA	NA	NA	NA	NA	chr10:94820026-94823252	Island	NM_183374	TSS200					10:94809776-94811385	10:94820882-94821041	Unclassified_Cell_type_specific	RP11-348J12.2;CYP26C1	ENST00000444965.1;ENST00000285949.5	TSS1500;TSS200	RP11-348J12.2;CYP26C1	ENST00000444965.1;ENST00000285949.5	TSS1500;TSS200			chr10:94818930-94829534	6	chr10:94819567-94824643	6		TRUE
cg25998745	7.96324	1.34e-06	0.00338465	0.153464	HYPER	chr8	142028625	+			II			NA	NA	NA	NA	NA	NA		OpenSea						TRUE										chr8:142028240-142029335	3						TRUE
cg18739367	7.96028	1.35e-06	0.00338465	0.345898	HYPER	chr8	38330740	+			II			NA	NA	NA	NA	NA	NA		OpenSea						TRUE																	TRUE
cg07470968	7.9568	1.36e-06	0.00338465	0.158873	HYPER	chr11	29207078	-	RP11-466I1.1		II			NA	NA	NA	NA	NA	NA		OpenSea						TRUE				RP11-466I1.1	ENST00000530960.1	5'UTR	RP11-466I1.1	ENST00000530960.1	5'UTR			chr11:29206495-29207624	5	chr11:29206406-29207674	3		TRUE
cg08401628	7.9565	1.36e-06	0.00338465	0.315525	HYPER	chr16	85433676	+			I	T	Red	NA	NA	NA	NA	NA	NA		OpenSea							16:83991169-83991265									chr16:85433520-85433815	3						TRUE
cg00270625	7.9549	1.36e-06	0.00338465	0.352649	HYPER	chr22	51017019	-	CPT1B,CHKB-CPT1B	CPT1B;CPT1B;CPT1B;CPT1B;CHKB-CPT1B;CPT1B;CPT1B;CPT1B;CPT1B;CPT1B;CPT1B;CPT1B	I	A	Red	NA	NA	NA	NA	NA	NA	chr22:51016253-51017020	Island	NM_152245;NM_001145137;NM_001145136;NM_001145135;NR_027928;NM_001145134;NM_152245;NM_004377;NM_152246;NM_001145135;NM_001145136;NM_001145134	1stExon;TSS1500;1stExon;5'UTR;Body;1stExon;5'UTR;TSS200;TSS200;1stExon;5'UTR;5'UTR				TRUE				CHKB-CPT1B;CPT1B;CHKB-CPT1B;CPT1B;CPT1B;CPT1B;CPT1B;CPT1B	ENST00000453634.1;ENST00000434492.2;ENST00000452668.1;ENST00000440709.1;ENST00000405237.3;ENST00000312108.7;ENST00000395650.2;ENST00000440709.1	3'UTR;5'UTR;3'UTR;5'UTR;TSS1500;TSS200;TSS200;1stExon	CHKB-CPT1B;CPT1B;CHKB-CPT1B;CPT1B;CPT1B;CPT1B;CPT1B;CPT1B;CPT1B;CPT1B;CPT1B;CHKB-CPT1B	ENST00000453634.1;ENST00000434492.2;ENST00000452668.1;ENST00000440709.1;ENST00000461117.1;ENST00000405237.3;ENST00000312108.7;ENST00000417176.1;ENST00000395650.2;ENST00000460853.1;ENST00000440709.1;ENST00000492556.1	3'UTR;5'UTR;3'UTR;5'UTR;TSS1500;TSS1500;TSS200;TSS1500;TSS200;TSS200;1stExon;3'UTR	chr22:51016525-51017195	3						TRUE
cg16901379	7.94984	1.37e-06	0.00339918	0.205562	HYPER	chr8	61894437	+			II			NA	NA	NA	NA	NA	NA		OpenSea																		chr8:61893441-61894713	6
cg25819846	7.94711	1.38e-06	0.00340208	0.388927	HYPER	chr12	131443445	-	GPR133	GPR133	I	C	Grn	NA	NA	NA	NA	NA	NA		OpenSea	NM_198827	Body					12:130009319-130009440						GPR133	ENST00000541143.1	5'UTR	chr12:131443280-131443675	3						TRUE
cg03984055	7.94148	1.39e-06	0.0034146	0.0919234	HYPER	chr16	31117318	-			I	C	Grn	NA	NA	NA	NA	NA	NA	chr16:31117101-31117435	Island							16:31024603-31024923	16:31116951-31117586	Unclassified	BCKDK	ENST00000394951.1	TSS200	BCKDK	ENST00000394951.1	TSS200	chr16:31117040-31117475	3						TRUE
cg19743522	7.94034	1.39e-06	0.0034146	0.184141	HYPER	chr12	113495566	-	DTX1	DTX1	I	C	Grn	NA	NA	NA	NA	NA	NA	chr12:113494389-113495534	S_Shore	NM_004416	TSS200					12:111978800-111979950			DTX1;DTX1	ENST00000257600.3;ENST00000257600.3	5'UTR;1stExon	DTX1;DTX1;DTX1	ENST00000548759.1;ENST00000257600.3;ENST00000257600.3	5'UTR;5'UTR;1stExon	chr12:113495365-113496295	3						TRUE
cg27396655	7.93644	1.4e-06	0.00342352	0.131222	HYPER	chr22	39240517	-		NPTXR	I	A	Red	rs116942161	0.022569	NA	NA	NA	NA	chr22:39239168-39240425	S_Shore	NM_014293	TSS1500								NPTXR	ENST00000333039.2	TSS1500	NPTXR	ENST00000333039.2	TSS1500	chr22:39240345-39240815	3						TRUE
cg03328571	-7.93218	1.41e-06	0.00343112	-0.279837	HYPO	chr2	170214803	-	LRP2	LRP2	II			rs830948	0.015994	NA	NA	NA	NA	chr2:170218314-170219203	N_Shelf	NM_004525	Body																					TRUE
cg07842327	7.9285	1.41e-06	0.00343112	0.191863	HYPER	chr1	2174725	+	SKI	SKI	I	T	Red	NA	NA	NA	NA	NA	NA		OpenSea	NM_003036	Body					1:2164513-2164823						SKI	ENST00000508416.1	5'UTR	chr1:2174665-2175290	3						TRUE
cg14591511	7.92732	1.42e-06	0.00343112	0.149274	HYPER	chr9	114375915	-	LRRC37A5P		II			rs74497134	0.011894	NA	NA	NA	NA		OpenSea										LRRC37A5P;LRRC37A5P	ENST00000374306.1;ENST00000374304.1	TSS200;5'UTR	LRRC37A5P;LRRC37A5P	ENST00000374306.1;ENST00000374304.1	TSS200;5'UTR	chr9:114375785-114376195	3						TRUE
cg10142997	7.9265	1.42e-06	0.00343112	0.332812	HYPER	chr13	67240245	-	PCDH9	PCDH9;PCDH9	II			NA	NA	NA	NA	NA	NA		OpenSea	NM_020403;NM_203487	Body;Body		chr13:67240182-67240182												chr13:67240125-67240395	3
cg13522114	-7.92233	1.43e-06	0.00343275	-0.20031	HYPO	chr19	6216405	+	MLLT1	MLLT1	I	A	Red	NA	NA	NA	NA	NA	NA	chr19:6215147-6215566	S_Shore	NM_005934	Body						19:6216261-6216761	Unclassified_Cell_type_specific	MLLT1	ENST00000252674.6	ExonBnd	MLLT1	ENST00000252674.6	ExonBnd	chr19:6215845-6216815	3						TRUE
cg02164262	7.92107	1.43e-06	0.00343275	0.447079	HYPER	chr22	44920214	+			II			rs6007182	0.015373	NA	NA	NA	NA		OpenSea																chr22:44920005-44920315	3
cg13461831	7.91576	1.44e-06	0.00343275	0.16576	HYPER	chr2	1705085	+	PXDN	PXDN	II			NA	NA	NA	NA	NA	NA		OpenSea	NM_012293	Body											PXDN	ENST00000485177.1	3'UTR	chr2:1704880-1705110	3
cg22079931	7.91557	1.44e-06	0.00343275	0.117392	HYPER	chr20	60252372	+	CDH4	CDH4;CDH4;CDH4	II			NA	NA	NA	NA	NA	NA		OpenSea	NM_001794;NM_001252338;NM_001252339	Body;Body;5'UTR								CDH4	ENST00000543233.1	5'UTR	CDH4	ENST00000543233.1	5'UTR			chr20:60251420-60252555	6
cg17445145	7.91319	1.45e-06	0.00343275	0.0333969	HYPER	chr4	330290	-	RP11-478C6.1	ZNF141	I	C	Grn	NA	NA	NA	NA	NA	NA	chr4:330162-332068	Island	NM_003441	TSS1500			DMR		4:320163-322607			ZNF141;ZNF141;ZNF141;ZNF141	ENST00000512994.1;ENST00000503699.1;ENST00000505939.1;ENST00000240499.7	TSS1500;TSS1500;TSS1500;TSS1500	ZNF141;ZNF141;ZNF141;ZNF141;ZNF141	ENST00000366506.4;ENST00000512994.1;ENST00000503699.1;ENST00000505939.1;ENST00000240499.7	TSS1500;TSS1500;TSS1500;TSS1500;TSS1500	chr4:329845-331635	3						TRUE
cg14788262	7.91239	1.45e-06	0.00343275	0.346729	HYPER	chr5	95852701	-	CTD-2337A12.1	LOC101929710	II			NA	NA	NA	NA	NA	NA		OpenSea	NR_130776	Body				TRUE							CTD-2337A12.1	ENST00000502645.1	5'UTR	chr5:95852220-95852795	3
cg26057969	7.91168	1.45e-06	0.00343275	0.146429	HYPER	chr3	127310291	+	TPRA1	TPRA1;TPRA1	II			NA	NA	NA	NA	NA	NA	chr3:127308568-127310132	S_Shore	NM_001136053;NM_001142646	TSS1500;TSS1500					3:128792399-128793087			TPRA1;TPRA1;TPRA1	ENST00000296210.7;ENST00000355552.3;ENST00000489960.1	TSS1500;TSS1500;TSS1500	TPRA1;TPRA1;TPRA1;TPRA1;TPRA1;TPRA1;TPRA1;TPRA1;TPRA1	ENST00000469111.1;ENST00000483868.1;ENST00000296210.7;ENST00000393400.2;ENST00000355552.3;ENST00000489960.1;ENST00000490290.1;ENST00000462228.1;ENST00000490643.1	TSS1500;TSS1500;TSS1500;TSS1500;TSS1500;TSS1500;TSS1500;5'UTR;5'UTR	chr3:127310160-127310515	3						TRUE
cg03764062	7.90655	1.46e-06	0.00344847	0.0469935	HYPER	chr11	64008174	-		FKBP2;FKBP2;FKBP2	II			NA	NA	NA	NA	NA	NA	chr11:64008283-64009487	N_Shore	NM_057092;NM_004470;NM_001135208	TSS1500;TSS1500;TSS1500								FKBP2;FKBP2;FKBP2	ENST00000309366.4;ENST00000449942.2;ENST00000394540.3	TSS1500;TSS1500;TSS1500	FKBP2;FKBP2;FKBP2;FKBP2;FKBP2;FKBP2	ENST00000536642.1;ENST00000309366.4;ENST00000541388.1;ENST00000449942.2;ENST00000535135.1;ENST00000394540.3	TSS1500;TSS1500;TSS1500;TSS1500;TSS1500;TSS1500	chr11:64007865-64008295	3						TRUE
cg25080559	7.90041	1.47e-06	0.00345443	0.137069	HYPER	chr12	19172291	+			II			rs78444802	0.0404	NA	NA	NA	NA		OpenSea																chr12:19172080-19172410	3
cg26986108	7.89735	1.48e-06	0.00345443	0.316727	HYPER	chr14	90921820	+	LINC00642	LINC00642	II			NA	NA	NA	NA	NA	NA		OpenSea	NR_033986	Body								AL096869.5;AL096869.5;AL096869.5;RP11-1078H9.1;AL096869.5;AL096869.5	ENST00000442515.1;ENST00000419459.1;ENST00000419459.1;ENST00000555413.1;ENST00000444942.1;ENST00000444942.1	5'UTR;1stExon;5'UTR;TSS1500;1stExon;5'UTR	AL096869.5;AL096869.5;AL096869.5;RP11-1078H9.1;AL096869.5;AL096869.5	ENST00000442515.1;ENST00000419459.1;ENST00000419459.1;ENST00000555413.1;ENST00000444942.1;ENST00000444942.1	5'UTR;1stExon;5'UTR;TSS1500;1stExon;5'UTR	chr14:90921505-90922015	3
cg06093355	-7.89499	1.49e-06	0.00345443	-0.300332	HYPO	chr2	46547693	+	EPAS1	EPAS1	II			NA	NA	NA	NA	NA	NA		OpenSea	NM_001430	Body				TRUE				EPAS1	ENST00000467888.1	5'UTR	EPAS1;EPAS1	ENST00000460015.1;ENST00000467888.1	5'UTR;5'UTR	chr2:46547420-46547695	3						TRUE
cg16747903	7.89492	1.49e-06	0.00345443	0.0773385	HYPER	chr1	18010399	-	ARHGEF10L	ARHGEF10L;ARHGEF10L	II			NA	NA	NA	NA	NA	NA		OpenSea	NM_018125;NM_001011722	Body;Body								ARHGEF10L	ENST00000469726.1	5'UTR	ARHGEF10L;ARHGEF10L	ENST00000469726.1;ENST00000475356.1	5'UTR;5'UTR			chr1:18009904-18012048	6
cg21364077	7.89317	1.49e-06	0.00345443	0.198903	HYPER	chr6	41394456	-			II			NA	NA	NA	NA	NA	NA	chr6:41395229-41396253	N_Shore					RDMR		6:41502402-41502964									chr6:41394140-41394575	3						TRUE
cg04764624	7.89217	1.49e-06	0.00345443	0.113335	HYPER	chr17	29718129	+		RAB11FIP4	II			NA	NA	NA	NA	NA	NA	chr17:29718230-29719291	N_Shore	NM_032932	TSS1500					17:26742002-26743580			RAB11FIP4	ENST00000325874.7	TSS1500	RAB11FIP4	ENST00000325874.7	TSS1500	chr17:29716945-29718555	3					TRUE	TRUE
cg06951412	-7.88905	1.5e-06	0.00345443	-0.112813	HYPO	chr4	184485245	-			II			NA	NA	NA	NA	NA	NA		OpenSea																chr4:184485080-184485335	3
cg14911520	7.88863	1.5e-06	0.00345443	0.125356	HYPER	chr15	100542628	-	ADAMTS17	ADAMTS17	II			rs28615596	0.018756	NA	NA	NA	NA		OpenSea	NM_139057	Body				TRUE										chr15:100542380-100542735	3						TRUE
cg10212045	7.88726	1.5e-06	0.00345443	0.241329	HYPER	chr17	9976506	-	GAS7	GAS7	II			NA	NA	NA	NA	NA	NA		OpenSea	NM_201433	Body				TRUE				GAS7	ENST00000540214.1	5'UTR	GAS7	ENST00000540214.1	5'UTR	chr17:9976345-9976635	3
cg14905657	7.88148	1.52e-06	0.00345673	0.15088	HYPER	chr12	16760048	-	MGST1,LMO3	LMO3;LMO3	II			NA	NA	NA	NA	NA	NA		OpenSea	NM_001001395;NM_018640	5'UTR;TSS1500								LMO3;LMO3;LMO3;LMO3;LMO3;LMO3;LMO3;LMO3;LMO3;LMO3;LMO3;LMO3;LMO3	ENST00000540445.1;ENST00000541295.1;ENST00000535535.1;ENST00000540445.1;ENST00000537568.1;ENST00000542544.1;ENST00000354662.1;ENST00000441439.2;ENST00000534946.1;ENST00000540848.1;ENST00000541846.1;ENST00000537304.1;ENST00000447609.1	5'UTR;TSS1500;TSS1500;1stExon;3'UTR;5'UTR;5'UTR;5'UTR;5'UTR;5'UTR;5'UTR;TSS1500;TSS1500	LMO3;LMO3;LMO3;LMO3;LMO3;LMO3;LMO3;LMO3;LMO3;LMO3;LMO3;LMO3;LMO3;LMO3;LMO3;LMO3;LMO3;LMO3;LMO3;LMO3;LMO3;LMO3;LMO3;LMO3;LMO3;LMO3;LMO3;LMO3;LMO3;LMO3;LMO3;LMO3;MGST1	ENST00000543721.1;ENST00000540445.1;ENST00000536172.1;ENST00000546281.1;ENST00000537757.1;ENST00000541295.1;ENST00000539232.1;ENST00000535535.1;ENST00000543721.1;ENST00000540445.1;ENST00000541764.1;ENST00000536172.1;ENST00000536509.1;ENST00000332914.6;ENST00000537568.1;ENST00000544276.1;ENST00000544754.1;ENST00000542544.1;ENST00000541589.1;ENST00000354662.1;ENST00000396205.2;ENST00000441439.2;ENS…	3'UTR;5'UTR;5'UTR;5'UTR;5'UTR;TSS1500;TSS1500;TSS1500;1stExon;1stExon;TSS200;1stExon;3'UTR;3'UTR;3'UTR;3'UTR;5'UTR;5'UTR;5'UTR;5'UTR;5'UTR;5'UTR;5'UTR;5'UTR;5'UTR;5'UTR;5'UTR;5'UTR;5'UTR;TSS1500;TSS1500;TSS1500;5'UTR	chr12:16759920-16760210	3						TRUE
cg14894848	7.88089	1.52e-06	0.00345673	0.109259	HYPER	chr22	48884945	+		FAM19A5	I	C	Grn	NA	NA	NA	NA	NA	NA	chr22:48884884-48887043	Island	NM_001082967	TSS1500			DMR		22:47263607-47265182			FAM19A5	ENST00000402357.1	TSS1500	FAM19A5;FAM19A5	ENST00000402357.1;ENST00000336769.5	TSS1500;TSS1500	chr22:48883865-48886575	3						TRUE
cg14470781	7.88089	1.52e-06	0.00345673	0.219825	HYPER	chr10	44918104	-			II			NA	NA	NA	NA	NA	NA		OpenSea
cg06778640	7.87633	1.53e-06	0.00347009	0.0846099	HYPER	chr9	130518200	-	SH2D3C	SH2D3C;SH2D3C;SH2D3C;SH2D3C;SH2D3C;SH2D3C;SH2D3C	II			NA	NA	NA	NA	NA	NA	chr9:130516407-130517849	S_Shore	NM_001142534;NM_001142533;NM_001252334;NM_005489;NM_170600;NM_001142532;NM_001142531	TSS1500;TSS1500;Body;Body;Body;5'UTR;5'UTR								SH2D3C;SH2D3C;SH2D3C;SH2D3C	ENST00000373274.3;ENST00000420366.1;ENST00000473535.1;ENST00000429553.1	TSS1500;TSS1500;3'UTR;5'UTR	SH2D3C;SH2D3C;SH2D3C;SH2D3C;SH2D3C;SH2D3C;SH2D3C;SH2D3C;SH2D3C	ENST00000414380.1;ENST00000373274.3;ENST00000420366.1;ENST00000473535.1;ENST00000468969.1;ENST00000471939.1;ENST00000464239.1;ENST00000488685.1;ENST00000429553.1	TSS1500;TSS1500;TSS1500;3'UTR;3'UTR;3'UTR;3'UTR;3'UTR;5'UTR	chr9:130517825-130518290	3
cg27428129	7.87	1.54e-06	0.00349264	0.233591	HYPER	chr6	34051095	-	GRM4	GRM4	II			NA	NA	rs75286976	0.014181	NA	NA		OpenSea	NM_000841	Body					6:34158994-34159095											chr6:34048833-34054565	6				TRUE
cg24913868	7.86407	1.56e-06	0.00351336	0.225416	HYPER	chr10	101296069	-	NKX2-3	NKX2-3	I	A	Red	NA	NA	NA	NA	NA	NA	chr10:101294443-101297263	Island	NM_145285	3'UTR			RDMR	TRUE	10:101284521-101286122			NKX2-3	ENST00000344586.7	3'UTR	NKX2-3	ENST00000344586.7	3'UTR	chr10:101295905-101297810	3						TRUE
cg22078460	-7.85627	1.57e-06	0.00351618	-0.35306	HYPO	chr11	109305966	-	RP11-708B6.2		II			NA	NA	NA	NA	NA	NA		OpenSea										RP11-708B6.2	ENST00000532929.1	3'UTR	RP11-708B6.2;RP11-708B6.2	ENST00000532992.1;ENST00000532929.1	3'UTR;3'UTR	chr11:109305940-109306135	3
cg07168930	-7.85322	1.58e-06	0.00351618	-0.309715	HYPO	chr10	114743764	-	TCF7L2	TCF7L2;TCF7L2;TCF7L2;TCF7L2;TCF7L2;TCF7L2	II			NA	NA	NA	NA	NA	NA		OpenSea	NM_001146284;NM_001146285;NM_030756;NM_001146274;NM_001146286;NM_001146283	Body;Body;Body;Body;Body;Body				TRUE				TCF7L2	ENST00000542695.1	5'UTR	TCF7L2	ENST00000542695.1	5'UTR								TRUE
cg18604947	7.84988	1.59e-06	0.00351618	0.0777829	HYPER	chr22	19609793	+			II			rs114920920	0.012598	NA	NA	NA	NA		OpenSea						TRUE		22:19609726-19609938	Unclassified_Cell_type_specific							chr22:19609345-19609995	3
cg16600634	7.84768	1.59e-06	0.00351618	0.220146	HYPER	chr5	92907881	-	NR2F1-AS1	FLJ42709;FLJ42709;FLJ42709	II			NA	NA	NA	NA	NA	NA	chr5:92906239-92908875	Island	NR_015369;NR_021490;NR_021491	TSS1500;Body;Body			RDMR	TRUE	5:92933473-92934164	5:92906983-92908154	Unclassified_Cell_type_specific	RP11-65F13.2	ENST00000504474.1	3'UTR	RP11-65F13.2;RP11-65F13.2;RP11-65F13.2;RP11-65F13.2;RP11-65F13.2	ENST00000504474.1;ENST00000503134.1;ENST00000507963.1;ENST00000513055.1;ENST00000510254.1	3'UTR;3'UTR;3'UTR;3'UTR;3'UTR	chr5:92907620-92908935	3						TRUE
cg15368791	7.84648	1.6e-06	0.00351618	0.122662	HYPER	chr10	133581731	+			II			rs115245401	0.013901	NA	NA	NA	NA		OpenSea																		chr10:133581083-133583295	6	chr10:133580964-133582296	5
cg05628549	7.8455	1.6e-06	0.00351618	0.188144	HYPER	chr11	6341895	-		PRKCDBP	I	C	Grn	NA	NA	NA	NA	NA	NA	chr11:6340445-6341909	Island	NM_145040	TSS200					11:6297022-6298816			PRKCDBP;PRKCDBP	ENST00000530979.1;ENST00000303927.3	TSS200;TSS200	PRKCDBP;PRKCDBP;PRKCDBP;PRKCDBP	ENST00000532354.1;ENST00000524852.1;ENST00000530979.1;ENST00000303927.3	TSS1500;TSS1500;TSS200;TSS200	chr11:6340985-6342475	3					TRUE	TRUE
cg18382862	7.84496	1.6e-06	0.00351618	0.0916193	HYPER	chr12	132075990	-			II			rs1005732	0.185804	NA	NA	NA	NA		OpenSea																chr12:132075785-132076075	3
cg09409865	-7.84171	1.61e-06	0.00351618	-0.167982	HYPO	chr20	33169887	-	PIGU	PIGU	II			NA	NA	NA	NA	NA	NA		OpenSea	NM_080476	Body								PIGU	ENST00000480175.1	3'UTR	PIGU	ENST00000480175.1	3'UTR	chr20:33169580-33169990	3
cg25192063	7.84048	1.61e-06	0.00351618	0.1608	HYPER	chr14	60387083	+	LRRC9	LRRC9	II			NA	NA	NA	NA	NA	NA	chr14:60386271-60386750	S_Shore	NR_075071	Body								RP11-62H20.1;LRRC9;LRRC9	ENST00000565968.1;ENST00000445360.1;ENST00000454474.2	TSS200;5'UTR;5'UTR	RP11-62H20.1;LRRC9;LRRC9;LRRC9	ENST00000565968.1;ENST00000254271.4;ENST00000570145.1;ENST00000454474.2	TSS200;5'UTR;5'UTR;5'UTR	chr14:60386205-60387295	3
cg01867652	-7.84002	1.61e-06	0.00351618	-0.340413	HYPO	chr13	81125459	+			II			NA	NA	NA	NA	NA	NA		OpenSea																chr13:81125340-81125570	3
cg09562790	7.83928	1.61e-06	0.00351618	0.0764291	HYPER	chr17	80023934	-		DUS1L	II			NA	NA	rs115200143	0.017811	rs115200143	0.017811	chr17:80022655-80024178	Island	NM_022156	TSS1500					17:77615957-77617467	17:80022705-80024446	Promoter_Associated	DUS1L;DUS1L;DUS1L	ENST00000542088.1;ENST00000354321.6;ENST00000306796.4	TSS1500;TSS1500;TSS1500	DUS1L;DUS1L;DUS1L	ENST00000542088.1;ENST00000354321.6;ENST00000306796.4	TSS1500;TSS1500;TSS1500	chr17:80023565-80024375	3						TRUE
cg08265926	7.83887	1.61e-06	0.00351618	0.213634	HYPER	chr16	81039227	-	CMC2	CENPN;CENPN;CENPN;C16orf61	II			NA	NA	NA	NA	NA	NA	chr16:81040134-81041325	N_Shore	NM_001100624;NM_018455;NM_001100625;NM_020188	TSS1500;TSS1500;TSS1500;5'UTR					16:79596647-79596970			CENPN;CENPN;CMC2;CMC2;CMC2;CMC2;CMC2;CMC2;CMC2;CMC2;CMC2	ENST00000305850.5;ENST00000299572.5;ENST00000564174.1;ENST00000562713.1;ENST00000570195.1;ENST00000565925.1;ENST00000565108.1;ENST00000565650.1;ENST00000486645.1;ENST00000219400.3;ENST00000565914.1	TSS1500;TSS1500;5'UTR;5'UTR;5'UTR;5'UTR;5'UTR;5'UTR;5'UTR;5'UTR;5'UTR	CENPN;CENPN;CMC2;CMC2;CMC2;CMC2;CMC2;CMC2;CMC2;CMC2;CMC2;CMC2;CMC2;CMC2;CMC2	ENST00000305850.5;ENST00000299572.5;ENST00000569187.1;ENST00000562828.1;ENST00000565514.1;ENST00000567593.1;ENST00000564174.1;ENST00000562713.1;ENST00000570195.1;ENST00000570086.1;ENST00000565108.1;ENST00000565650.1;ENST00000486645.1;ENST00000219400.3;ENST00000565914.1	TSS1500;TSS1500;3'UTR;3'UTR;3'UTR;5'UTR;5'UTR;5'UTR;5'UTR;5'UTR;5'UTR;5'UTR;5'UTR;5'UTR;5'UTR	chr16:81039025-81039235	3						TRUE
cg20196290	7.83872	1.62e-06	0.00351618	0.112994	HYPER	chr1	164591449	+	PBX1	PBX1;PBX1;PBX1	II			NA	NA	NA	NA	NA	NA		OpenSea	NM_001204961;NM_002585;NM_001204963	Body;Body;Body								PBX1;PBX1	ENST00000560469.1;ENST00000468104.1	5'UTR;5'UTR	PBX1;PBX1;PBX1	ENST00000498497.2;ENST00000560469.1;ENST00000468104.1	5'UTR;5'UTR;5'UTR	chr1:164591400-164591735	3
cg19845971	-7.82156	1.66e-06	0.00359718	-0.238118	HYPO	chr10	76443751	+	ADK	ADK;ADK;ADK;ADK	II			NA	NA	NA	NA	NA	NA		OpenSea	NM_006721;NM_001202450;NM_001123;NM_001202449	Body;Body;Body;Body														chr10:76443520-76443850	3
cg08485329	7.81696	1.67e-06	0.00361097	0.136078	HYPER	chr1	180896579	-	KIAA1614	KIAA1614	II			NA	NA	NA	NA	NA	NA		OpenSea	NM_020950	Body								KIAA1614	ENST00000367587.1	TSS1500	KIAA1614;KIAA1614	ENST00000367587.1;ENST00000483705.1	TSS1500;TSS1500	chr1:180896485-180896875	3
cg18388270	7.81518	1.67e-06	0.00361097	0.328338	HYPER	chr1	149212246	+			I	T	Red	NA	NA	NA	NA	NA	NA		OpenSea							1:147478760-147479147																TRUE
cg00888313	-7.81342	1.68e-06	0.00361097	-0.210025	HYPO	chr19	5344050	+			II			NA	NA	NA	NA	NA	NA	chr19:5339640-5341061	S_Shelf																chr19:5343860-5344135	3
cg16508692	-7.80812	1.69e-06	0.00362967	-0.279837	HYPO	chr21	17080032	-			II			NA	NA	NA	NA	NA	NA		OpenSea										snoU13	ENST00000459376.1	TSS1500	snoU13	ENST00000459376.1	TSS1500
cg19783404	7.80564	1.7e-06	0.00363315	0.0632005	HYPER	chr11	67751269	+			II			NA	NA	NA	NA	NA	NA		OpenSea							11:67507573-67507868																TRUE
cg00602094	-7.79622	1.72e-06	0.0036728	-0.302365	HYPO	chr21	42622722	-	BACE2	BACE2;BACE2;BACE2	II			NA	NA	NA	NA	NA	NA		OpenSea	NM_138992;NM_012105;NM_138991	Body;Body;Body								BACE2	ENST00000466122.1	5'UTR	BACE2;BACE2;BACE2;BACE2;TMPRSS3	ENST00000466122.1;ENST00000465326.1;ENST00000463674.1;ENST00000487994.1;ENST00000553129.1	5'UTR;5'UTR;5'UTR;5'UTR;3'UTR	chr21:42622485-42622770	3
cg18558808	-7.7947	1.72e-06	0.0036728	-0.210236	HYPO	chr18	70538365	-	RP11-676J15.1		II			NA	NA	NA	NA	NA	NA	chr18:70533965-70536871	S_Shore					CDMR											chr18:70538125-70538795	3						TRUE
cg03426423	7.7899	1.74e-06	0.00368032	0.179285	HYPER	chr1	4079195	-			II			NA	NA	NA	NA	NA	NA		OpenSea							1:3978695-3979310									chr1:4078825-4079235	3						TRUE
cg16430184	-7.7897	1.74e-06	0.00368032	-0.306427	HYPO	chr22	31848385	-	DRG1,EIF4ENIF1	EIF4ENIF1;EIF4ENIF1;EIF4ENIF1	II			NA	NA	NA	NA	NA	NA		OpenSea	NM_001164502;NM_001164501;NM_019843	Body;Body;Body											EIF4ENIF1	ENST00000495101.1	TSS1500	chr22:31848220-31848475	3
cg16128892	-7.78469	1.75e-06	0.00369796	-0.144434	HYPO	chr3	149915226	-	RP11-167H9.4		II			rs12053936	0.373706	NA	NA	NA	NA		OpenSea						TRUE				RP11-167H9.4	ENST00000489690.1	5'UTR	RP11-167H9.4;RP11-167H9.4	ENST00000489690.1;ENST00000487840.1	5'UTR;5'UTR								TRUE
cg24549153	7.78103	1.76e-06	0.00369882	0.0676209	HYPER	chr18	37421319	-	RP11-636O21.1		II			NA	NA	NA	NA	NA	NA	chr18:37421460-37421829	N_Shore																		chr18:37420859-37422466	6	chr18:37420343-37422955	6		TRUE
cg13185046	7.78092	1.76e-06	0.00369882	0.152994	HYPER	chr6	32165321	+	NOTCH4	NOTCH4	II			NA	NA	NA	NA	NA	NA	chr6:32163292-32164383	S_Shore	NM_004557	Body								NOTCH4	ENST00000443903.2	1stExon	NOTCH4;NOTCH4;NOTCH4	ENST00000474612.1;ENST00000491215.1;ENST00000443903.2	3'UTR;TSS1500;1stExon	chr6:32164940-32165495	3						TRUE
cg20414098	7.77512	1.78e-06	0.00370936	0.143116	HYPER	chr11	65150159	-	SLC25A45	SLC25A45;SLC25A45	II			NA	NA	NA	NA	NA	NA	chr11:65153726-65154606	N_Shelf	NM_182556;NM_001077241	TSS200;TSS200				TRUE		11:65149260-65150575	Promoter_Associated	SLC25A45;SLC25A45;SLC25A45;SLC25A45;SLC25A45;SLC25A45	ENST00000417511.2;ENST00000526432.1;ENST00000527174.1;ENST00000534028.1;ENST00000294187.6;ENST00000360662.3	5'UTR;TSS1500;TSS1500;TSS1500;TSS200;TSS200	SLC25A45;SLC25A45;SLC25A45;SLC25A45;SLC25A45;SLC25A45;SLC25A45;SLC25A45;SLC25A45;SLC25A45;SLC25A45;SLC25A45;SLC25A45;SLC25A45	ENST00000417511.2;ENST00000526898.1;ENST00000526432.1;ENST00000526259.1;ENST00000527174.1;ENST00000534028.1;ENST00000533629.1;ENST00000294187.6;ENST00000529431.1;ENST00000529962.1;ENST00000531791.1;ENST00000377152.2;ENST00000524438.1;ENST00000530936.1	5'UTR;5'UTR;TSS1500;TSS1500;TSS1500;TSS1500;TSS200;TSS200;TSS200;TSS200;TSS200;TSS200;TSS200;TSS200	chr11:65149760-65150455	3						TRUE
cg27441101	-7.77324	1.78e-06	0.00370936	-0.18005	HYPO	chr2	85567777	+			II			NA	NA	NA	NA	NA	NA		OpenSea																chr2:85567465-85567915	3
cg08471173	-7.77257	1.78e-06	0.00370936	-0.046377	HYPO	chr2	171012543	+			II			NA	NA	NA	NA	NA	NA		OpenSea						TRUE										chr2:171012220-171012695	3						TRUE
cg19977633	7.77187	1.78e-06	0.00370936	0.0963918	HYPER	chr5	141117222	-			II			NA	NA	NA	NA	NA	NA		OpenSea						TRUE																	TRUE
cg12776171	7.77	1.79e-06	0.00370993	0.114148	HYPER	chr17	72442928	-	GPRC5C	GPRC5C;GPRC5C	II			NA	NA	NA	NA	NA	NA	chr17:72442927-72443194	Island	NM_018653;NM_022036	Body;Body								GPRC5C	ENST00000482723.1	5'UTR	GPRC5C;GPRC5C	ENST00000482723.1;ENST00000481232.1	5'UTR;5'UTR	chr17:72442680-72443355	3						TRUE
cg16429505	7.76445	1.8e-06	0.00372193	0.0786435	HYPER	chr7	100488398	-	ACHE	UFSP1;ACHE;ACHE	II			NA	NA	NA	NA	NA	NA	chr7:100489981-100490365	N_Shore	NM_001015072;NM_000665;NM_015831	TSS1500;Body;3'UTR								UFSP1;ACHE;ACHE;ACHE	ENST00000388761.2;ENST00000302913.4;ENST00000447483.1;ENST00000411582.1	TSS1500;3'UTR;3'UTR;3'UTR	UFSP1;ACHE;ACHE;ACHE;ACHE;ACHE	ENST00000388761.2;ENST00000302913.4;ENST00000447483.1;ENST00000454485.1;ENST00000442452.1;ENST00000411582.1	TSS1500;3'UTR;3'UTR;3'UTR;3'UTR;3'UTR	chr7:100488360-100489055	3						TRUE
cg14717116	7.7643	1.8e-06	0.00372193	0.184548	HYPER	chr17	709765	+	NXN	NXN	I	T	Red	rs12950366	0.113699	NA	NA	NA	NA	chr17:710581-710912	N_Shore	NM_022463	Body					17:656435-656585						NXN	ENST00000574018.1	TSS1500	chr17:709485-710190	3						TRUE
cg07870541	7.75942	1.82e-06	0.00373936	0.163158	HYPER	chr17	20687481	-			II			NA	NA	NA	NA	NA	NA	chr17:20687569-20687913	N_Shore																		chr17:20687406-20688067	6				TRUE
cg13608647	-7.75572	1.83e-06	0.00375029	-0.092065	HYPO	chr20	44090074	+			II			rs6017575	0.442257	NA	NA	NA	NA		OpenSea																chr20:44089865-44090190	3
cg15627593	7.75141	1.84e-06	0.00376475	0.207951	HYPER	chr17	17457836	+	PEMT	PEMT;PEMT;PEMT	II			NA	NA	NA	NA	NA	NA		OpenSea	NM_148172;NM_148173;NM_007169	Body;Body;Body					17:17398446-17398586						PEMT;PEMT	ENST00000472446.1;ENST00000461404.1	3'UTR;3'UTR								TRUE
cg27456707	7.74742	1.85e-06	0.00377742	0.134744	HYPER	chr11	63839511	+	MACROD1,RP11-21A7A.2	MACROD1	I	C	Grn	NA	NA	NA	NA	NA	NA		OpenSea	NM_014067	Body					11:63596055-63596128			RP11-21A7A.2	ENST00000537170.1	5'UTR	MACROD1;MACROD1;MACROD1;RP11-21A7A.2;RP11-21A7A.2	ENST00000543422.1;ENST00000545464.1;ENST00000542359.1;ENST00000537170.1;ENST00000538550.1	3'UTR;3'UTR;3'UTR;5'UTR;5'UTR	chr11:63839400-63839615	3						TRUE
cg11573170	7.74404	1.86e-06	0.00378676	0.122379	HYPER	chr10	556762	-	DIP2C	DIP2C	II			NA	NA	NA	NA	NA	NA		OpenSea	NM_014974	Body		chr10:556579-556579		TRUE	10:546357-546763	10:556516-557965	Unclassified	DIP2C	ENST00000381496.3	5'UTR	DIP2C	ENST00000381496.3	5'UTR	chr10:556520-556955	3						TRUE
cg14636261	7.74032	1.87e-06	0.00379477	0.160343	HYPER	chr9	136133628	-	ABO	ABO	II			NA	NA	NA	NA	NA	NA	chr9:136131001-136131831	S_Shore	NM_020469	Body				TRUE				ABO	ENST00000453660.1	3'UTR	ABO;ABO	ENST00000538324.1;ENST00000453660.1	3'UTR;3'UTR	chr9:136133545-136133875	3						TRUE
cg05092483	-7.73849	1.88e-06	0.00379477	-0.156507	HYPO	chr16	19222463	+	SYT17	SYT17;SYT17	II			NA	NA	NA	NA	NA	NA		OpenSea	NM_016524;NM_001308157	Body;Body		chr16:19222406-19222406						SYT17	ENST00000568433.1	TSS200	SYT17	ENST00000568433.1	TSS200	chr16:19222345-19222610	3
cg26477549	7.73744	1.88e-06	0.00379477	0.217545	HYPER	chr12	106642937	-	CKAP4	CKAP4	I	A	Red	NA	NA	NA	NA	NA	NA	chr12:106640880-106642374	S_Shore	NM_006825	TSS1500						12:106642507-106643348	Promoter_Associated	CKAP4;CKAP4	ENST00000378026.4;ENST00000552828.1	TSS1500;3'UTR	CKAP4;CKAP4	ENST00000378026.4;ENST00000552828.1	TSS1500;3'UTR	chr12:106642280-106643075	3						TRUE
cg03683166	7.73484	1.89e-06	0.00379978	0.105814	HYPER	chr13	113611729	+	MCF2L		II			NA	NA	NA	NA	NA	NA		OpenSea					CDMR	TRUE							MCF2L	ENST00000442625.1	3'UTR			chr13:113610865-113611942	6	chr13:113610971-113611904	6		TRUE
cg16627346	7.72303	1.92e-06	0.00385785	0.185787	HYPER	chr2	96057706	+			II			NA	NA	NA	NA	NA	NA	chr2:96054894-96055143	S_Shelf																chr2:96057625-96057950	3						TRUE
cg07268046	7.72127	1.93e-06	0.00385813	0.12576	HYPER	chr12	5783698	-	ANO2	ANO2;ANO2	II			rs6489647	0.469434	NA	NA	NA	NA		OpenSea	NM_001278596;NM_001278597	Body;Body								ANO2	ENST00000538154.1	3'UTR	ANO2;ANO2	ENST00000542326.1;ENST00000538154.1	3'UTR;3'UTR	chr12:5783245-5783855	3
cg08544436	7.7154	1.94e-06	0.00387666	0.153719	HYPER	chr5	53814625	+	SNX18	SNX18;SNX18;SNX18	II			rs61999266	0.030579	NA	NA	NA	NA	chr5:53813379-53815306	Island	NM_052870;NM_001102575;NM_001145427	1stExon;1stExon;1stExon					5:53849137-53851276	5:53812911-53814884	Promoter_Associated	SNX18;SNX18;SNX18	ENST00000343017.6;ENST00000381410.4;ENST00000326277.3	1stExon;1stExon;1stExon	SNX18;SNX18;SNX18	ENST00000343017.6;ENST00000381410.4;ENST00000326277.3	1stExon;1stExon;1stExon	chr5:53814045-53815030	3						TRUE
cg15006828	7.71468	1.94e-06	0.00387666	0.229837	HYPER	chr20	45081360	-	ZNF663P		II			NA	NA	NA	NA	NA	NA		OpenSea										RP5-981L23.1	ENST00000400371.2	3'UTR	RP5-981L23.1	ENST00000400371.2	3'UTR								TRUE	TRUE
cg09262978	7.7107	1.96e-06	0.00388925	0.0541064	HYPER	chr17	60783129	+	RP11-156L14.1,MARCH10	MARCH10;MARCH10;MARCH10;MARCH10	II			NA	NA	NA	NA	NA	NA	chr17:60781141-60781934	S_Shore	NM_001100875;NM_152598;NM_001288779;NM_001288780	Body;Body;Body;Body			RDMR	TRUE										chr17:60782920-60783955	3
cg21430752	7.70914	1.96e-06	0.00388925	0.153659	HYPER	chr17	79359767	-			II			NA	NA	NA	NA	NA	NA	chr17:79360383-79361723	N_Shore										RP11-1055B8.3;RP11-1055B8.3;RP11-1055B8.3;RP11-1055B8.3	ENST00000570301.1;ENST00000572301.1;ENST00000574041.1;ENST00000572077.1	TSS1500;TSS1500;TSS1500;TSS1500	RP11-1055B8.3;RP11-1055B8.3;RP11-1055B8.3;RP11-1055B8.3	ENST00000570301.1;ENST00000572301.1;ENST00000574041.1;ENST00000572077.1	TSS1500;TSS1500;TSS1500;TSS1500	chr17:79359325-79359775	3						TRUE
cg01558916	7.70688	1.97e-06	0.00388939	0.213984	HYPER	chr19	11804727	+			II			NA	NA	NA	NA	NA	NA	chr19:11805261-11805900	N_Shore				chr19:11804467-11804467												chr19:11804405-11805035	3						TRUE
cg14702960	7.70575	1.97e-06	0.00388939	0.218774	HYPER	chr12	68634040	-			II			NA	NA	NA	NA	NA	NA		OpenSea						TRUE										chr12:68633860-68634290	3						TRUE
cg02389931	-7.70278	1.98e-06	0.00389312	-0.294897	HYPO	chr10	422076	+	DIP2C	DIP2C	II			NA	NA	NA	NA	NA	NA	chr10:422180-422411	N_Shore	NM_014974	Body					10:412019-412411																TRUE
cg27649272	7.7009	1.99e-06	0.00389312	0.332547	HYPER	chr4	5364873	+	STK32B	STK32B;STK32B	II			rs76362147	0.016927	NA	NA	NA	NA		OpenSea	NM_018401;NM_001306082	Body;Body											STK32B;STK32B	ENST00000512018.1;ENST00000505508.1	3'UTR;5'UTR					chr4:5363317-5364925	6
cg21808406	-7.7001	1.99e-06	0.00389312	-0.207678	HYPO	chr17	7482475	-	SNORA67	CD68;CD68	II			NA	NA	NA	NA	NA	NA	chr17:7486285-7487431	N_Shelf	NM_001040059;NM_001251	TSS1500;TSS1500			RDMR					CD68;CD68	ENST00000250092.5;ENST00000380498.5	TSS1500;TSS1500	CD68;CD68	ENST00000250092.5;ENST00000380498.5	TSS1500;TSS1500	chr17:7482345-7483015	3						TRUE
cg04427490	7.69786	1.99e-06	0.00389652	0.124533	HYPER	chr19	708469	+		PALM;PALM	II			NA	NA	NA	NA	NA	NA	chr19:708530-708742	N_Shore	NM_001040134;NM_002579	TSS1500;TSS1500								PALM	ENST00000264560.7	TSS1500	PALM	ENST00000264560.7	TSS1500	chr19:708320-708515	3						TRUE
cg22682751	7.69545	2e-06	0.00390094	0.0535199	HYPER	chr3	48230398	+		CDC25A;CDC25A	II			NA	NA	NA	NA	NA	NA	chr3:48229077-48230285	S_Shore	NM_201567;NM_001789	TSS1500;TSS1500						3:48228930-48230528	Promoter_Associated	CDC25A	ENST00000302506.3	TSS1500	CDC25A;CDC25A;CDC25A	ENST00000443342.1;ENST00000302506.3;ENST00000437972.1	TSS1500;TSS1500;TSS1500	chr3:48230305-48230475	3						TRUE
cg19972104	-7.69289	2.01e-06	0.00390627	-0.341571	HYPO	chr10	114868643	-	TCF7L2	TCF7L2;TCF7L2;TCF7L2;TCF7L2;TCF7L2;TCF7L2;TCF7L2;TCF7L2;TCF7L2;TCF7L2;TCF7L2;TCF7L2;TCF7L2	II			NA	NA	NA	NA	NA	NA		OpenSea	NM_001198525;NM_001198528;NM_001198527;NM_001198531;NM_001146286;NM_001146284;NM_001146283;NM_001198530;NM_001198529;NM_001146285;NM_001146274;NM_030756;NM_001198526	Body;Body;Body;Body;Body;Body;Body;Body;Body;Body;Body;Body;Body								TCF7L2	ENST00000542695.1	5'UTR	TCF7L2	ENST00000542695.1	5'UTR					chr10:114867826-114869069	6
cg02563906	7.68917	2.02e-06	0.00391844	0.173781	HYPER	chr11	831375	-	AP006621.8,EFCAB4A	EFCAB4A	II			NA	NA	NA	NA	NA	NA	chr11:829284-833558	Island	NM_173584	Body				TRUE	11:819314-822265	11:829828-831432	Unclassified	AP006621.8;CD151	ENST00000532946.1;ENST00000397420.3	3'UTR;TSS1500	AP006621.8;EFCAB4A;EFCAB4A;EFCAB4A;EFCAB4A;CD151	ENST00000532946.1;ENST00000530688.1;ENST00000527763.1;ENST00000528694.1;ENST00000526531.1;ENST00000397420.3	3'UTR;5'UTR;5'UTR;5'UTR;5'UTR;TSS1500	chr11:831320-831535	3						TRUE
cg12676421	7.68345	2.04e-06	0.00394262	0.251691	HYPER	chr11	100503713	+			II			NA	NA	NA	NA	NA	NA		OpenSea																chr11:100503680-100504190	3
cg17004327	-7.6758	2.06e-06	0.00397289	-0.312086	HYPO	chr14	33127237	+	AKAP6	AKAP6	II			NA	NA	NA	NA	NA	NA		OpenSea	NM_004274	Body											AKAP6;AKAP6	ENST00000555207.1;ENST00000555950.1	5'UTR;5'UTR			chr14:33126178-33127534	6
cg25748521	7.67472	2.06e-06	0.00397289	0.199528	HYPER	chr7	139366758	-	HIPK2	HIPK2;HIPK2	II			NA	NA	NA	NA	NA	NA		OpenSea	NM_001113239;NM_022740	Body;Body				TRUE										chr7:139366605-139367835	3						TRUE
cg03554962	7.67347	2.07e-06	0.00397289	0.251778	HYPER	chr16	86404423	-			II			rs74512827	0.052436	NA	NA	NA	NA		OpenSea							16:84961859-84961925																TRUE
cg13188626	-7.67157	2.07e-06	0.00397452	-0.240284	HYPO	chr10	84835409	-			II			NA	NA	NA	NA	NA	NA		OpenSea																chr10:84835220-84835455	3
cg13755873	7.66531	2.09e-06	0.00400247	0.0894121	HYPER	chr17	70113187	+	SOX9-AS1		II			NA	NA	NA	NA	NA	NA	chr17:70112824-70114271	Island					RDMR	TRUE	17:67624420-67626485			AC005152.2	ENST00000434703.1	TSS1500	AC005152.2;AC005152.2;AC005152.2;AC005152.2;AC005152.2;AC005152.2	ENST00000434703.1;ENST00000529667.1;ENST00000440093.2;ENST00000533232.1;ENST00000533179.1;ENST00000414600.1	TSS1500;3'UTR;3'UTR;3'UTR;3'UTR;3'UTR	chr17:70112845-70113330	3						TRUE
cg21061022	7.66114	2.11e-06	0.00400894	0.116914	HYPER	chr5	149979645	-		SYNPO	II			NA	NA	NA	NA	NA	NA		OpenSea	NM_001166208	TSS1500				TRUE				SYNPO	ENST00000394243.1	TSS1500	SYNPO	ENST00000394243.1	TSS1500			chr5:149978288-149981964	6	chr5:149979582-149980184	6
cg13328642	-7.66017	2.11e-06	0.00400894	-0.331942	HYPO	chr14	91144251	-	TTC7B	TTC7B	II			NA	NA	NA	NA	NA	NA		OpenSea	NM_001010854	Body						14:91143902-91144414	Unclassified_Cell_type_specific				TTC7B	ENST00000554462.1	TSS200	chr14:91143900-91144355	3
cg11708640	7.65802	2.12e-06	0.00400894	0.141068	HYPER	chr7	155558908	-	RBM33	RBM33	II			NA	NA	NA	NA	NA	NA		OpenSea	NM_053043	Body								RBM33	ENST00000341148.3	5'UTR	RBM33;RBM33;RBM33	ENST00000392755.2;ENST00000438356.1;ENST00000341148.3	TSS1500;5'UTR;5'UTR
cg14534279	7.65779	2.12e-06	0.00400894	0.484448	HYPER	chr10	3329966	+			II			rs77171408	0.013889	NA	NA	NA	NA		OpenSea							10:3319765-3319996									chr10:3329785-3330075	3						TRUE
cg01910033	7.65379	2.13e-06	0.00402352	0.105965	HYPER	chr10	120959052	+			II			NA	NA	NA	NA	NA	NA		OpenSea								10:120958968-120959276	Unclassified							chr10:120959000-120959255	3
cg25247998	7.65021	2.14e-06	0.00403559	0.171795	HYPER	chr8	26108217	+			II			NA	NA	NA	NA	NA	NA		OpenSea																chr8:26107880-26108255	3
cg22164367	7.64839	2.15e-06	0.00403698	0.180624	HYPER	chr7	34115212	+	BMPER	BMPER	II			rs116658299	0.016073	NA	NA	NA	NA	chr7:34118463-34118759	N_Shelf	NM_133468	Body				TRUE							BMPER	ENST00000476525.1	5'UTR								TRUE
cg23986158	7.64299	2.17e-06	0.00406034	0.197408	HYPER	chr1	8847014	-	RERE	RERE;RERE	II			NA	NA	NA	NA	NA	NA		OpenSea	NM_012102;NM_001042681	5'UTR;5'UTR								RERE;RERE	ENST00000337907.3;ENST00000400908.2	5'UTR;5'UTR	RERE;RERE	ENST00000337907.3;ENST00000400908.2	5'UTR;5'UTR								TRUE	TRUE
cg02040836	7.64035	2.18e-06	0.00406626	0.130827	HYPER	chr20	42574356	+	TOX2	TOX2;TOX2;TOX2;TOX2	II			rs11700304	0.000228	NA	NA	NA	NA		OpenSea	NM_001098796;NM_001098797;NM_001098798;NM_032883	5'UTR;Body;TSS200;5'UTR								TOX2;TOX2;TOX2;TOX2;TOX2	ENST00000358131.5;ENST00000358131.5;ENST00000372992.5;ENST00000423191.1;ENST00000372999.1	5'UTR;1stExon;5'UTR;5'UTR;5'UTR	TOX2;TOX2;TOX2;TOX2;TOX2;TOX2	ENST00000358131.5;ENST00000358131.5;ENST00000372992.5;ENST00000442881.1;ENST00000423191.1;ENST00000372999.1	5'UTR;1stExon;5'UTR;5'UTR;5'UTR;5'UTR								TRUE
cg19774868	-7.63773	2.18e-06	0.00406626	-0.208346	HYPO	chr18	77905408	-		LOC100130522;LOC100130522	I	A	Red	NA	NA	NA	NA	NA	NA	chr18:77905297-77905566	Island	NR_028339;NR_028340	TSS1500;TSS1500					18:76006311-76006557	18:77905301-77905944	Promoter_Associated_Cell_type_specific							chr18:77905080-77905615	3						TRUE
cg12515083	7.63729	2.19e-06	0.00406626	0.286304	HYPER	chr1	32225203	+	BAI2	MIR4254;ADGRB2;ADGRB2	II			NA	NA	NA	NA	NA	NA	chr1:32226146-32226535	N_Shore	NR_036216;NM_001294336;NM_001294335	TSS1500;5'UTR;5'UTR								BAI2;BAI2;BAI2;BAI2;BAI2	ENST00000398556.3;ENST00000398547.1;ENST00000398542.1;ENST00000373658.3;ENST00000257070.4	TSS200;5'UTR;5'UTR;5'UTR;5'UTR	BAI2;BAI2;BAI2;BAI2;BAI2;BAI2	ENST00000436464.1;ENST00000398556.3;ENST00000398547.1;ENST00000398542.1;ENST00000373655.2;ENST00000257070.4	5'UTR;TSS200;5'UTR;5'UTR;5'UTR;5'UTR	chr1:32224640-32226535	3
cg10079027	-7.62751	2.22e-06	0.00409907	-0.37738	HYPO	chr16	1533880	+			II			rs75740045	0.02516	NA	NA	NA	NA	chr16:1535925-1536576	N_Shelf							16:1473764-1473954									chr16:1533520-1534070	3						TRUE
cg08006263	7.62744	2.22e-06	0.00409907	0.122361	HYPER	chr20	31127002	+	C20orf112	NOL4L	II			NA	NA	NA	NA	NA	NA	chr20:31123989-31124697	S_Shelf	NM_001256798	Body		chr20:31126982-31126982												chr20:31126425-31127135	3
cg09143318	7.62728	2.22e-06	0.00409907	0.150043	HYPER	chr17	32255976	-	ASIC2	ACCN1	II			rs11869694	0.066545	NA	NA	NA	NA		OpenSea	NM_001094	Body				TRUE																	TRUE
cg19179025	7.62317	2.23e-06	0.00411491	0.0844359	HYPER	chr3	47325421	-	KLHL18	KIF9;KIF9;KIF9;KLHL18	II			NA	NA	NA	NA	NA	NA	chr3:47323747-47324607	S_Shore	NM_001134878;NM_022342;NM_182902;NM_025010	TSS1500;TSS1500;TSS1500;Body								KIF9;KIF9;KIF9;KLHL18;KIF9;KIF9;KIF9;KLHL18	ENST00000425853.1;ENST00000452770.2;ENST00000352910.4;ENST00000483201.1;ENST00000432493.1;ENST00000335044.2;ENST00000265529.3;ENST00000455924.2	TSS1500;TSS1500;TSS1500;5'UTR;TSS1500;TSS1500;TSS1500;5'UTR	KIF9;KIF9;KIF9;KIF9;KIF9;KLHL18;KIF9;KIF9;KIF9;KLHL18;KLHL18	ENST00000425853.1;ENST00000443784.1;ENST00000452770.2;ENST00000352910.4;ENST00000456548.1;ENST00000483201.1;ENST00000432493.1;ENST00000335044.2;ENST00000265529.3;ENST00000461084.1;ENST00000455924.2	TSS1500;TSS1500;TSS1500;TSS1500;TSS1500;5'UTR;TSS1500;TSS1500;TSS1500;5'UTR;5'UTR	chr3:47324545-47325450	3
cg01926459	-7.62069	2.24e-06	0.00412072	-0.130012	HYPO	chr11	47327440	-	MADD	MADD;MADD;MADD;MADD;MADD;MADD;MADD;MADD;MADD;MADD	II			NA	NA	NA	NA	NA	NA		OpenSea	NM_130475;NM_130474;NM_130476;NM_130473;NM_130470;NM_003682;NM_130472;NM_130471;NM_001135944;NM_001135943	Body;Body;Body;Body;Body;Body;Body;Body;Body;Body														chr11:47327300-47327630	3
cg02842850	7.61552	2.26e-06	0.00412483	0.0350581	HYPER	chr19	5148130	-	KDM4B	KDM4B	I	T	Red	NA	NA	NA	NA	NA	NA	chr19:5147854-5148176	Island	NM_015015	Body					19:5098837-5099176									chr19:5147985-5149135	3						TRUE
cg02955098	7.61514	2.26e-06	0.00412483	0.124089	HYPER	chr1	3473665	+	MEGF6	MEGF6	II			NA	NA	NA	NA	NA	NA		OpenSea	NM_001409	Body					1:3462892-3463628											chr1:3469197-3475212	6				TRUE
cg25426982	-7.61466	2.26e-06	0.00412483	-0.159636	HYPO	chr18	61683198	+			II			NA	NA	NA	NA	NA	NA		OpenSea																		chr18:61682328-61687007	6
cg03739287	-7.61385	2.26e-06	0.00412483	-0.249616	HYPO	chr2	38471584	+			II			NA	NA	NA	NA	NA	NA		OpenSea
cg00549574	7.60897	2.28e-06	0.00414584	0.249907	HYPER	chr17	74350942	+	PRPSAP1	PRPSAP1	I	A	Red	NA	NA	NA	NA	NA	NA	chr17:74349151-74350656	S_Shore	NM_002766	TSS1500								PRPSAP1;PRPSAP1	ENST00000446526.2;ENST00000324684.4	TSS1500;TSS1500	PRPSAP1;PRPSAP1;PRPSAP1;PRPSAP1;PRPSAP1;PRPSAP1;PRPSAP1	ENST00000435555.1;ENST00000435555.1;ENST00000423915.1;ENST00000436498.1;ENST00000494662.1;ENST00000446526.2;ENST00000324684.4	1stExon;5'UTR;5'UTR;TSS1500;TSS1500;TSS1500;TSS1500	chr17:74350900-74351350	3						TRUE
cg05257666	7.60457	2.3e-06	0.00415552	0.164116	HYPER	chr15	77841816	-			II			rs80347838	0.28238	NA	NA	NA	NA		OpenSea																chr15:77841665-77842055	3
cg11288686	7.60227	2.3e-06	0.00415552	0.306009	HYPER	chr12	29735807	+	TMTC1	TMTC1	I	C	Grn	NA	NA	NA	NA	NA	NA		OpenSea	NM_175861	Body				TRUE				TMTC1	ENST00000319685.8	3'UTR	TMTC1;TMTC1;TMTC1	ENST00000319685.8;ENST00000553189.1;ENST00000546582.1	3'UTR;3'UTR;3'UTR	chr12:29735660-29736110	3						TRUE
cg13411506	7.60199	2.31e-06	0.00415552	0.164053	HYPER	chr13	113649513	+	MCF2L	MCF2L;MCF2L	I	T	Red	NA	NA	NA	NA	NA	NA	chr13:113648343-113649601	Island	NM_001112732;NM_024979	Body;Body					13:112696883-112697976											chr13:113647302-113657112	6				TRUE
cg09518670	7.60067	2.31e-06	0.00415552	0.127985	HYPER	chr16	88150515	+			II			rs11640173	0.2	NA	NA	NA	NA	chr16:88153995-88154558	N_Shelf					CDMR		16:86707636-86708367			BANP	ENST00000540932.1	3'UTR	BANP	ENST00000540932.1	3'UTR			chr16:88150257-88151437	6				TRUE
cg25908391	7.59981	2.31e-06	0.00415552	0.0673486	HYPER	chr16	87028529	-			II			NA	NA	NA	NA	NA	NA		OpenSea						TRUE										chr16:87027940-87028755	3
cg10919760	-7.59524	2.33e-06	0.00416832	-0.194144	HYPO	chr8	100816724	+	VPS13B	VPS13B;VPS13B	II			NA	NA	NA	NA	NA	NA		OpenSea	NM_152564;NM_017890	Body;Body								VPS13B	ENST00000395996.1	3'UTR	VPS13B	ENST00000395996.1	3'UTR	chr8:100816500-100816750	3
cg12184421	7.59361	2.33e-06	0.00416832	0.234038	HYPER	chr1	167409136	+	CD247	CD247;CD247	II			rs12725261	0.01	NA	NA	NA	NA	chr1:167408512-167409137	Island	NM_198053;NM_000734	Body;Body				TRUE				CD247	ENST00000483825.1	3'UTR	CD247;CD247;CD247;CD247	ENST00000476733.1;ENST00000470379.1;ENST00000483825.1;ENST00000479979.1	TSS1500;TSS1500;3'UTR;3'UTR	chr1:167408525-167409195	3						TRUE
cg25003878	-7.59326	2.34e-06	0.00416832	-0.356905	HYPO	chr1	178421387	-	RASAL2	RASAL2;RASAL2	II			NA	NA	NA	NA	NA	NA		OpenSea	NM_004841;NM_170692	Body;Body								RASAL2	ENST00000367647.2	TSS200	RASAL2	ENST00000367647.2	TSS200
cg22025263	7.59031	2.35e-06	0.0041775	0.13555	HYPER	chr1	43419475	-	SLC2A1	SLC2A1	II			NA	NA	NA	NA	NA	NA	chr1:43423467-43424768	N_Shelf	NM_006516	Body											SLC2A1	ENST00000460369.1	3'UTR	chr1:43419240-43419755	3						TRUE
cg16023662	7.58416	2.37e-06	0.00420712	0.248611	HYPER	chr22	27207536	-			II			rs7286704	0.316651	NA	NA	NA	NA		OpenSea																				chr22:27206800-27207996	6
cg15750534	7.58138	2.38e-06	0.00421538	0.109795	HYPER	chr19	17623398	+	PGLS	PGLS	II			NA	NA	NA	NA	NA	NA	chr19:17622317-17623316	S_Shore	NM_012088	Body						19:17622016-17623901	Promoter_Associated							chr19:17622640-17623675	3						TRUE
cg00508131	7.57974	2.38e-06	0.0042163	0.164067	HYPER	chr16	333153	+	PDIA2	PDIA2;PDIA2	II			rs45519642	0.013158	NA	NA	NA	NA	chr16:334444-334764	N_Shore	NM_006849;NM_006849	5'UTR;1stExon						16:333087-333881	Unclassified_Cell_type_specific	PDIA2;PDIA2;PDIA2;PDIA2	ENST00000455994.2;ENST00000404312.1;ENST00000219406.6;ENST00000219406.6	TSS200;TSS200;5'UTR;1stExon	PDIA2;PDIA2;PDIA2;PDIA2;PDIA2;PDIA2	ENST00000482665.1;ENST00000455994.2;ENST00000404312.1;ENST00000456379.1;ENST00000219406.6;ENST00000219406.6	TSS1500;TSS200;TSS200;TSS200;5'UTR;1stExon	chr16:332985-333855	3						TRUE
cg16343272	7.57555	2.4e-06	0.00423367	0.108187	HYPER	chr12	56694667	+	RP11-977G19.10,RP11-977G19.11	CS	II			NA	NA	NA	NA	NA	NA	chr12:56693680-56694345	S_Shore	NM_004077	TSS1500			RDMR					CS;CS;CS;RP11-977G19.11;RP11-977G19.11	ENST00000542324.2;ENST00000548567.1;ENST00000351328.3;ENST00000549565.1;ENST00000549860.1	TSS1500;TSS1500;TSS1500;5'UTR;5'UTR	CS;CS;CS;CS;CS;CS;CS;CS;CS;CS;CS;CS;CS;CS;CS;CS;CS;CS;RP11-977G19.11;RP11-977G19.11	ENST00000547298.1;ENST00000551936.1;ENST00000551253.1;ENST00000550044.1;ENST00000552688.1;ENST00000548041.1;ENST00000551137.1;ENST00000552222.1;ENST00000549143.1;ENST00000542324.2;ENST00000549221.1;ENST00000550159.1;ENST00000550700.1;ENST00000550734.1;ENST00000548849.1;ENST00000550655.1;ENST00000548567.1;ENST00000351328.3;ENST00000549565.1;ENST00000549860.1	TSS1500;TSS1500;TSS1500;TSS1500;TSS1500;TSS1500;TSS1500;TSS1500;TSS1500;TSS1500;TSS1500;TSS1500;TSS1500;TSS1500;TSS1500;TSS1500;TSS1500;TSS1500;5'UTR;5'UTR	chr12:56694460-56694735	3						TRUE
cg10556092	7.57387	2.41e-06	0.00423499	0.275157	HYPER	chr3	161162415	+	RP11-3P17.4	LOC101243545	II			NA	NA	NA	NA	NA	NA		OpenSea	NR_102265	Body								RP11-3P17.4	ENST00000473595.1	5'UTR	RP11-3P17.4	ENST00000473595.1	5'UTR					chr3:161161641-161162890	6
cg08982940	-7.56971	2.42e-06	0.00425232	-0.0914789	HYPO	chr17	19575583	+	ALDH3A2	ALDH3A2;ALDH3A2	II			NA	NA	NA	NA	NA	NA		OpenSea	NM_001031806;NM_000382	Body;Body								ALDH3A2	ENST00000573565.1	5'UTR	ALDH3A2;ALDH3A2;ALDH3A2;ALDH3A2;ALDH3A2	ENST00000574597.1;ENST00000472059.1;ENST00000476965.1;ENST00000573947.1;ENST00000573565.1	TSS200;3'UTR;5'UTR;5'UTR;5'UTR	chr17:19575265-19575635	3
cg19535031	-7.56733	2.43e-06	0.00425816	-0.129785	HYPO	chr15	85297378	+	ZNF592,RP11-7M10.2	ZNF592	II			NA	NA	NA	NA	NA	NA		OpenSea	NM_014630	5'UTR								RP11-7M10.2;ZNF592	ENST00000559666.1;ENST00000560079.2	5'UTR;5'UTR	RP11-7M10.2;ZNF592	ENST00000559666.1;ENST00000560079.2	5'UTR;5'UTR	chr15:85297180-85297455	3
cg15607221	7.56019	2.46e-06	0.00426826	0.113184	HYPER	chr21	16435482	-	NRIP1	NRIP1	II			NA	NA	NA	NA	NA	NA	chr21:16436496-16437864	N_Shore	NM_003489	5'UTR		chr21:16435480-16435480						NRIP1;NRIP1;NRIP1	ENST00000318948.4;ENST00000400199.1;ENST00000400202.1	5'UTR;5'UTR;5'UTR	NRIP1;NRIP1;NRIP1	ENST00000318948.4;ENST00000400199.1;ENST00000400202.1	5'UTR;5'UTR;5'UTR	chr21:16435325-16436010	3
cg12115557	7.55941	2.46e-06	0.00426826	0.146613	HYPER	chr10	118544342	+			I	A	Red	NA	NA	NA	NA	NA	NA	chr10:118547636-118547854	N_Shelf																							TRUE
cg05935282	7.55939	2.46e-06	0.00426826	0.299497	HYPER	chr18	47146565	-			II			NA	NA	NA	NA	NA	NA		OpenSea																		chr18:47145400-47146980	5
cg11815572	7.55939	2.46e-06	0.00426826	0.13355	HYPER	chr11	126390396	+	KIRREL3	KIRREL3;KIRREL3;KIRREL3	II			NA	NA	NA	NA	NA	NA		OpenSea	NM_032531;NM_001301097;NM_001161707	Body;Body;Body														chr11:126390285-126390595	3
cg14984781	7.55742	2.47e-06	0.00426826	0.175126	HYPER	chr17	31867	+		DOC2B	II			rs112190617	0.047075	NA	NA	NA	NA	chr17:29994-31868	Island	NM_003585	TSS1500						17:31278-32130	Unclassified_Cell_type_specific	DOC2B;DOC2B	ENST00000575802.1;ENST00000343572.7	TSS1500;TSS1500	DOC2B;DOC2B	ENST00000575802.1;ENST00000343572.7	TSS1500;TSS1500	chr17:31665-33335	3						TRUE
cg24264043	7.55578	2.47e-06	0.00426826	0.191583	HYPER	chr15	75872274	+	CTD-2323K18.1	PTPN9	II			NA	NA	NA	NA	NA	NA	chr15:75870802-75871814	S_Shore	NM_002833	TSS1500								PTPN9;CTD-2323K18.1	ENST00000306726.2;ENST00000568707.1	TSS1500;3'UTR	PTPN9;CTD-2323K18.1;CTD-2323K18.1;CTD-2323K18.1	ENST00000306726.2;ENST00000566032.1;ENST00000565138.1;ENST00000568707.1	TSS1500;3'UTR;3'UTR;3'UTR	chr15:75871940-75872295	3
cg21627774	7.55555	2.47e-06	0.00426826	0.14755	HYPER	chr10	80049914	+	LINC00856,LINC00595		II			NA	NA	NA	NA	NA	NA		OpenSea										C10orf101;C10orf101	ENST00000461034.1;ENST00000459633.1	5'UTR;5'UTR	C10orf101;RP11-90J7.3;RP11-90J7.3;RP11-90J7.3;C10orf101	ENST00000461034.1;ENST00000429250.2;ENST00000546103.1;ENST00000432742.1;ENST00000459633.1	5'UTR;5'UTR;5'UTR;5'UTR;5'UTR	chr10:80049905-80050150	3
cg13550230	-7.55406	2.48e-06	0.00426853	-0.22654	HYPO	chr1	24304566	-	SRSF10	SRSF10;SRSF10;SRSF10;SRSF10;SRSF10;SRSF10;SRSF10;SRSF10;SRSF10	II			NA	NA	NA	NA	NA	NA	chr1:24306363-24307017	N_Shore	NM_001191005;NM_054016;NR_034035;NM_006625;NM_001191009;NM_001191007;NM_001300937;NM_001191006;NM_001300936	Body;Body;Body;Body;Body;Body;Body;Body;Body								SRSF10	ENST00000485841.1	TSS1500	SRSF10;SRSF10;SRSF10;SRSF10;SRSF10;SRSF10;SRSF10;SRSF10;SRSF10	ENST00000495785.1;ENST00000467887.1;ENST00000497214.1;ENST00000485292.1;ENST00000485841.1;ENST00000497214.1;ENST00000338597.5;ENST00000341154.6;ENST00000473858.1	3'UTR;3'UTR;3'UTR;3'UTR;TSS1500;1stExon;TSS200;3'UTR;3'UTR	chr1:24304380-24304695	3
cg08517040	7.54908	2.5e-06	0.00427634	0.315626	HYPER	chr12	752834	+	NINJ2,RP11-218M22.1	NINJ2;NINJ2;NINJ2;LOC100049716	I	C	Grn	NA	NA	NA	NA	NA	NA	chr12:752208-752655	S_Shore	NM_001294346;NM_016533;NM_001294346;NR_122124	1stExon;Body;5'UTR;Body				TRUE	12:622031-623319	12:751653-753427	Promoter_Associated	RP11-218M22.1;NINJ2;NINJ2;NINJ2;NINJ2;RP11-218M22.1;RP11-218M22.1;RP11-218M22.1	ENST00000318291.4;ENST00000537416.1;ENST00000433832.2;ENST00000542920.1;ENST00000537416.1;ENST00000537514.1;ENST00000543884.1;ENST00000318291.4	1stExon;1stExon;TSS200;TSS200;3'UTR;5'UTR;5'UTR;5'UTR	RP11-218M22.1;NINJ2;NINJ2;NINJ2;NINJ2;RP11-218M22.1;RP11-218M22.1;RP11-218M22.1	ENST00000318291.4;ENST00000537416.1;ENST00000433832.2;ENST00000542920.1;ENST00000537416.1;ENST00000537514.1;ENST00000543884.1;ENST00000318291.4	1stExon;1stExon;TSS200;TSS200;3'UTR;5'UTR;5'UTR;5'UTR	chr12:751660-753430	3
cg25658588	7.54843	2.5e-06	0.00427634	0.317108	HYPER	chr2	23808186	+	KLHL29	KLHL29	II			NA	NA	NA	NA	NA	NA		OpenSea	NM_052920	Body											KLHL29	ENST00000489446.1	5'UTR	chr2:23808165-23808675	3
cg11588488	-7.54615	2.51e-06	0.00427634	-0.295813	HYPO	chr14	99817380	+			II			NA	NA	NA	NA	NA	NA	chr14:99814456-99815096	S_Shelf																chr14:99817245-99817455	3
cg18008037	7.54477	2.51e-06	0.00427634	0.17598	HYPER	chr7	158272029	-	PTPRN2	PTPRN2;PTPRN2;PTPRN2	I	C	Grn	NA	NA	NA	NA	NA	NA		OpenSea	NM_002847;NM_130842;NM_130843	Body;Body;Body					7:157964395-157964938											chr7:158271789-158272751	4				TRUE
cg13316619	-7.54473	2.52e-06	0.00427634	-0.118765	HYPO	chr15	73314754	+			II			rs76318630	0.011729	NA	NA	NA	NA		OpenSea						TRUE										chr15:73314620-73314955	3						TRUE
cg13842077	-7.54398	2.52e-06	0.00427634	-0.313038	HYPO	chr10	50714003	-	ERCC6	ERCC6	II			NA	NA	NA	NA	NA	NA		OpenSea	NM_000124	Body				TRUE				ERCC6	ENST00000539110.1	TSS200	ERCC6;ERCC6;ERCC6	ENST00000475116.1;ENST00000539110.1;ENST00000475116.1	1stExon;TSS200;3'UTR
cg14868258	7.54243	2.52e-06	0.00427634	0.23566	HYPER	chr6	82958285	+		IBTK;IBTK	II			NA	NA	NA	NA	NA	NA	chr6:82957625-82957842	S_Shore	NM_015525;NM_001300906	TSS1500;TSS1500								IBTK	ENST00000306270.7	TSS1500	IBTK;IBTK	ENST00000503400.1;ENST00000306270.7	TSS1500;TSS1500	chr6:82956585-82958615	3
cg06626102	7.5414	2.53e-06	0.00427634	0.096208	HYPER	chr5	1346156	-		CLPTM1L	II			NA	NA	NA	NA	NA	NA	chr5:1344545-1345469	S_Shore	NM_030782	TSS1500					5:1399061-1399295			CLPTM1L;CLPTM1L	ENST00000320927.6;ENST00000320895.5	TSS1500;TSS1500	CLPTM1L;CLPTM1L	ENST00000320927.6;ENST00000320895.5	TSS1500;TSS1500	chr5:1345425-1346435	3						TRUE
cg07820966	7.53684	2.55e-06	0.00429692	0.106772	HYPER	chr4	185859052	-			II			rs75748238	0.03649	NA	NA	NA	NA		OpenSea																chr4:185858980-185859250	3
cg03605773	7.53318	2.56e-06	0.00430975	0.0907554	HYPER	chr1	9488706	+			II			NA	NA	NA	NA	NA	NA	chr1:9488937-9489249	N_Shore						TRUE	1:9411239-9411836	1:9488398-9489686	Promoter_Associated							chr1:9488445-9488835	3						TRUE
cg08218149	7.5304	2.57e-06	0.00430975	0.130784	HYPER	chr11	70072100	+			II			NA	NA	NA	NA	NA	NA		OpenSea						TRUE										chr11:70071680-70072115	3
cg20588069	7.5299	2.57e-06	0.00430975	0.0346662	HYPER	chr4	4860439	+		MSX1	II			NA	NA	NA	NA	NA	NA	chr4:4861227-4862241	N_Shore	NM_002448	TSS1500			RDMR		4:4911301-4911341			MSX1	ENST00000382723.4	TSS1500	MSX1	ENST00000382723.4	TSS1500			chr4:4859474-4865264	6	chr4:4856053-4874633	6	TRUE	TRUE
cg18353747	7.52511	2.59e-06	0.00430975	0.344401	HYPER	chr13	30963558	-			II			NA	NA	NA	NA	NA	NA		OpenSea				chr13:30963439-30963439		TRUE										chr13:30963420-30964115	3
cg27433516	7.52407	2.6e-06	0.00430975	0.260797	HYPER	chr1	37266621	-	GRIK3	GRIK3	II			NA	NA	NA	NA	NA	NA		OpenSea	NM_000831	3'UTR								GRIK3	ENST00000373091.3	3'UTR	GRIK3	ENST00000373091.3	3'UTR								TRUE
cg26991433	7.52367	2.6e-06	0.00430975	0.157858	HYPER	chr6	7140931	+	RREB1	RREB1;RREB1;RREB1;RREB1	II			NA	NA	NA	NA	NA	NA	chr6:7141036-7141576	N_Shore	NM_001003700;NM_001003699;NM_001168344;NM_001003698	5'UTR;5'UTR;5'UTR;5'UTR					6:7085889-7086575	6:7140857-7142017	Promoter_Associated	RREB1;RREB1;RREB1	ENST00000379933.3;ENST00000379938.2;ENST00000334984.6	5'UTR;5'UTR;5'UTR	RREB1;RREB1;RREB1;RREB1;RREB1;RREB1;RREB1;RREB1	ENST00000379933.3;ENST00000491191.1;ENST00000379938.2;ENST00000471433.1;ENST00000467782.1;ENST00000334984.6;ENST00000483150.1;ENST00000475946.1	5'UTR;5'UTR;5'UTR;5'UTR;5'UTR;5'UTR;5'UTR;5'UTR	chr6:7140680-7142195	3						TRUE
cg10010183	-7.52226	2.6e-06	0.00430975	-0.152225	HYPO	chr1	29651806	+	PTPRU	PTPRU;PTPRU;PTPRU	II			NA	NA	NA	NA	NA	NA		OpenSea	NM_133178;NM_133177;NM_005704	Body;Body;Body				TRUE				PTPRU	ENST00000465525.1	5'UTR	PTPRU;PTPRU;PTPRU	ENST00000493601.1;ENST00000465525.1;ENST00000492954.1	5'UTR;5'UTR;5'UTR			chr1:29650961-29652435	6	chr1:29651290-29651926	4		TRUE
cg04093736	7.52108	2.61e-06	0.00430975	0.269216	HYPER	chr8	67024651	-			II			NA	NA	NA	NA	NA	NA	chr8:67025850-67026118	N_Shore										AC084082.3;AC084082.3	ENST00000520930.1;ENST00000517961.1	TSS1500;TSS1500	AC084082.3;AC084082.3	ENST00000520930.1;ENST00000517961.1	TSS1500;TSS1500					chr8:67024467-67028011	6
cg04951371	7.52076	2.61e-06	0.00430975	0.498622	HYPER	chr2	3317860	+	TSSC1	TSSC1	I	T	Red	NA	NA	NA	NA	NA	NA	chr2:3317676-3317935	Island	NM_003310	Body				TRUE	2:3296809-3296942			TSSC1	ENST00000478754.1	3'UTR	TSSC1;TSSC1;TSSC1	ENST00000478754.1;ENST00000463662.1;ENST00000406835.2	3'UTR;3'UTR;3'UTR	chr2:3317685-3318130	3						TRUE
cg01040280	-7.51982	2.61e-06	0.00430975	-0.233462	HYPO	chr20	32612393	+	RALY	RALY;RALY	II			NA	NA	NA	NA	NA	NA		OpenSea	NM_016732;NM_007367	5'UTR;5'UTR				TRUE				RALY;RALY	ENST00000375114.3;ENST00000246194.3	5'UTR;5'UTR	RALY;RALY;RALY;RALY;RALY	ENST00000375114.3;ENST00000448364.1;ENST00000246194.3;ENST00000413297.1;ENST00000333552.5	5'UTR;5'UTR;5'UTR;5'UTR;5'UTR	chr20:32612300-32613075	3
cg15893507	-7.51951	2.61e-06	0.00430975	-0.524416	HYPO	chr1	211705432	-			II			rs7527626	0.370964	NA	NA	NA	NA		OpenSea																		chr1:211705168-211705680	4
cg22695386	7.51411	2.64e-06	0.00433564	0.167873	HYPER	chr16	69530002	-			II			rs8050116	0.122029	NA	NA	NA	NA		OpenSea																chr16:69529585-69530055	3
cg26725931	-7.51284	2.64e-06	0.00433564	-0.234322	HYPO	chr1	91865923	-	HFM1	HFM1	II			NA	NA	NA	NA	NA	NA	chr1:91869876-91870390	N_Shelf	NM_001017975	Body								HFM1;HFM1	ENST00000294696.5;ENST00000370424.3	5'UTR;5'UTR	HFM1;HFM1;HFM1;HFM1	ENST00000294696.5;ENST00000481900.1;ENST00000488023.1;ENST00000370424.3	5'UTR;3'UTR;3'UTR;5'UTR	chr1:91865780-91866010	3
cg11286861	7.51037	2.65e-06	0.00433677	0.175627	HYPER	chr22	49748019	-			II			NA	NA	NA	NA	NA	NA		OpenSea							22:48133842-48134117									chr22:49747445-49748315	3
cg24685109	7.50975	2.65e-06	0.00433677	0.13328	HYPER	chr15	43477090	+	EPB42,TMEM62,RP11-473C18.3	TMEM62;CCNDBP1;CCNDBP1;CCNDBP1;CCNDBP1	II			NA	NA	NA	NA	NA	NA	chr15:43477588-43477816	N_Shore	NM_024956;NM_012142;NM_037370;NR_027513;NR_027514	3'UTR;TSS1500;TSS1500;TSS1500;TSS1500						15:43476922-43480165	Promoter_Associated	CCNDBP1;CCNDBP1;CCNDBP1;RP11-473C18.3;TMEM62;EPB42	ENST00000300213.4;ENST00000356633.5;ENST00000562176.1;ENST00000565685.1;ENST00000260403.2;ENST00000563128.1	TSS1500;TSS1500;TSS1500;3'UTR;3'UTR;3'UTR	CCNDBP1;CCNDBP1;CCNDBP1;CCNDBP1;CCNDBP1;CCNDBP1;CCNDBP1;CCNDBP1;CCNDBP1;CCNDBP1;RP11-473C18.3;CCNDBP1;CCNDBP1;TMEM62;TMEM62;TMEM62;EPB42	ENST00000564630.1;ENST00000300213.4;ENST00000566515.1;ENST00000569745.1;ENST00000563065.1;ENST00000567434.1;ENST00000562052.1;ENST00000566833.1;ENST00000562176.1;ENST00000562553.1;ENST00000565685.1;ENST00000567690.1;ENST00000444658.3;ENST00000564494.1;ENST00000260403.2;ENST00000563859.1;ENST00000563128.1	TSS1500;TSS1500;TSS1500;TSS1500;TSS1500;TSS1500;TSS1500;TSS1500;TSS1500;TSS1500;3'UTR;TSS1500;TSS1500;3'UTR;3'UTR;5'UTR;3'UTR			chr15:43476660-43478698	6	chr15:43476787-43478884	6		TRUE
cg22389845	-7.50701	2.66e-06	0.00433677	-0.146228	HYPO	chr3	14581955	+	GRIP2	GRIP2	II			NA	NA	NA	NA	NA	NA		OpenSea	NM_001080423	TSS200								GRIP2	ENST00000273083.3	TSS200	GRIP2;GRIP2;GRIP2;GRIP2	ENST00000443613.2;ENST00000413414.1;ENST00000273083.3;ENST00000507975.1	TSS200;TSS200;TSS200;3'UTR	chr3:14581005-14582035	3
cg05649922	7.50684	2.66e-06	0.00433677	0.19558	HYPER	chr1	27029290	+	ARID1A	ARID1A;ARID1A	II			NA	NA	NA	NA	NA	NA		OpenSea	NM_006015;NM_139135	Body;Body				TRUE										chr1:27029200-27029430	3						TRUE
cg23328852	7.50584	2.67e-06	0.00433677	0.0977196	HYPER	chr5	132946269	-	FSTL4	FSTL4	II			NA	NA	NA	NA	NA	NA	chr5:132946744-132948467	N_Shore	NM_015082	5'UTR			RDMR					FSTL4;FSTL4	ENST00000360575.5;ENST00000265342.7	5'UTR;5'UTR	FSTL4;FSTL4	ENST00000360575.5;ENST00000265342.7	5'UTR;5'UTR	chr5:132946145-132946395	3						TRUE
cg00084347	7.50352	2.68e-06	0.00434318	0.309801	HYPER	chr12	124393913	+	DNAH10	DNAH10	II			NA	NA	NA	NA	NA	NA		OpenSea	NM_207437	Body					12:122959572-122959883																TRUE
cg13805297	-7.49936	2.7e-06	0.00436186	-0.405994	HYPO	chr9	90224272	+	DAPK1	DAPK1	II			NA	NA	NA	NA	NA	NA		OpenSea	NM_004938	Body				TRUE							DAPK1;DAPK1;DAPK1	ENST00000469067.1;ENST00000496522.1;ENST00000472344.1	5'UTR;5'UTR;5'UTR								TRUE
cg27502912	7.49443	2.72e-06	0.00437387	0.266151	HYPER	chr22	51017001	-	CPT1B,CHKB-CPT1B	CPT1B;CPT1B;CPT1B;CPT1B;CHKB-CPT1B;CPT1B;CPT1B;CPT1B;CPT1B;CPT1B;CPT1B;CPT1B	I	C	Grn	NA	NA	NA	NA	NA	NA	chr22:51016253-51017020	Island	NM_152245;NM_001145137;NM_001145136;NM_001145135;NR_027928;NM_001145134;NM_152245;NM_004377;NM_152246;NM_001145135;NM_001145136;NM_001145134	1stExon;TSS1500;1stExon;5'UTR;Body;1stExon;5'UTR;TSS200;TSS200;1stExon;5'UTR;5'UTR				TRUE	22:49363077-49363870			CHKB-CPT1B;CPT1B;CHKB-CPT1B;CPT1B;CPT1B;CPT1B;CPT1B;CPT1B	ENST00000453634.1;ENST00000434492.2;ENST00000452668.1;ENST00000440709.1;ENST00000405237.3;ENST00000312108.7;ENST00000395650.2;ENST00000440709.1	3'UTR;5'UTR;3'UTR;5'UTR;TSS1500;TSS200;TSS200;1stExon	CHKB-CPT1B;CPT1B;CHKB-CPT1B;CPT1B;CPT1B;CPT1B;CPT1B;CPT1B;CPT1B;CPT1B;CPT1B;CHKB-CPT1B	ENST00000453634.1;ENST00000434492.2;ENST00000452668.1;ENST00000440709.1;ENST00000461117.1;ENST00000405237.3;ENST00000312108.7;ENST00000417176.1;ENST00000395650.2;ENST00000460853.1;ENST00000440709.1;ENST00000492556.1	3'UTR;5'UTR;3'UTR;5'UTR;TSS1500;TSS1500;TSS200;TSS1500;TSS200;TSS200;1stExon;3'UTR	chr22:51016525-51017195	3						TRUE
cg27637730	-7.49363	2.72e-06	0.00437387	-0.196396	HYPO	chr7	155438919	+	RBM33	RBM33	II			NA	NA	NA	NA	NA	NA	chr7:155436673-155437817	S_Shore	NM_053043	Body			RDMR								AC009403.2	ENST00000472015.1	TSS1500	chr7:155438785-155438955	3						TRUE
cg24664346	7.49352	2.72e-06	0.00437387	0.0920703	HYPER	chr17	7825949	-	KCNAB3		I	C	Grn	rs35427970	0.025582	NA	NA	NA	NA	chr17:7826127-7826414	N_Shore						TRUE		17:7825794-7826781	Unclassified_Cell_type_specific	KCNAB3	ENST00000303790.2	3'UTR	KCNAB3	ENST00000303790.2	3'UTR	chr17:7825745-7826110	3						TRUE
cg15202351	7.48341	2.76e-06	0.00442301	0.0814551	HYPER	chr1	1952273	-	GABRD	GABRD	II			NA	NA	NA	NA	NA	NA	chr1:1950411-1951479	S_Shore	NM_000815	Body		chr1:1952050-1952050												chr1:1949845-1953995	3
cg04621043	-7.48263	2.77e-06	0.00442301	-0.195478	HYPO	chr17	16373224	+	FAM211A-AS1,FAM211A	LRRC75A-AS1;LRRC75A-AS1;LRRC75A-AS1;LRRC75A-AS1;LRRC75A-AS1;LRRC75A-AS1;LRRC75A-AS1;LRRC75A-AS1;LRRC75A-AS1;LRRC75A-AS1;LRRC75A;LRRC75A	II			NA	NA	NA	NA	NA	NA		OpenSea	NR_027178;NR_027177;NR_027176;NR_027175;NR_027174;NR_027173;NR_027172;NR_027171;NR_045025;NR_045023;NM_001113567;NM_207387	Body;Body;Body;Body;Body;Body;Body;Body;Body;Body;Body;Body														chr17:16373200-16373415	3
cg11944127	7.48221	2.77e-06	0.00442301	0.0910809	HYPER	chr2	231829238	+			II			rs118165444	0.069444	NA	NA	NA	NA		OpenSea							2:231537262-231537728																TRUE
cg00891781	7.48085	2.77e-06	0.00442318	0.197831	HYPER	chr2	43152827	+			II			NA	NA	NA	NA	NA	NA		OpenSea				chr2:43152648-43152648												chr2:43152325-43152950	3
cg04654716	7.47849	2.78e-06	0.00442329	0.198312	HYPER	chr5	74162924	-	CTD-2377O17.1	FAM169A	II			NA	NA	NA	NA	NA	NA	chr5:74161536-74162716	S_Shore	NM_015566	TSS1500			RDMR		5:74197263-74198681			FAM169A	ENST00000510496.1	TSS1500	FAM169A;FAM169A;FAM169A;FAM169A;FAM169A	ENST00000506954.1;ENST00000510609.1;ENST00000514200.1;ENST00000513277.1;ENST00000510496.1	TSS1500;TSS1500;TSS1500;TSS200;TSS1500	chr5:74161185-74162995	3						TRUE
cg14480531	7.47818	2.78e-06	0.00442329	0.161791	HYPER	chr17	55700565	+	MSI2	MSI2;MSI2	II			NA	NA	NA	NA	NA	NA		OpenSea	NM_138962;NM_170721	Body;Body		chr17:55700521-55700521		TRUE										chr17:55700505-55700855	3						TRUE
cg02315775	7.47235	2.81e-06	0.00445399	0.188734	HYPER	chr1	20063945	-	TMCO4	TMCO4;TMCO4	II			rs35274017	0.015634	NA	NA	NA	NA		OpenSea	NM_181719;NM_181719	ExonBnd;Body								TMCO4;TMCO4	ENST00000294543.6;ENST00000489814.1	ExonBnd;3'UTR	TMCO4;TMCO4;TMCO4	ENST00000294543.6;ENST00000489135.1;ENST00000489814.1	ExonBnd;3'UTR;3'UTR	chr1:20063900-20064395	3
cg00294956	7.4671	2.83e-06	0.00448095	0.164857	HYPER	chr5	13921996	-	DNAH5	DNAH5	II			NA	NA	NA	NA	NA	NA		OpenSea	NM_001369	Body				TRUE							DNAH5	ENST00000508040.1	3'UTR	chr5:13921745-13922015	3						TRUE
cg20416345	-7.46318	2.85e-06	0.00449434	-0.251143	HYPO	chr1	36735198	+	THRAP3	THRAP3	II			NA	NA	NA	NA	NA	NA		OpenSea	NM_005119	5'UTR								THRAP3;THRAP3	ENST00000354618.5;ENST00000469141.2	5'UTR;5'UTR	THRAP3;THRAP3;THRAP3	ENST00000354618.5;ENST00000469141.2;ENST00000478853.1	5'UTR;5'UTR;5'UTR	chr1:36735080-36735350	3
cg23830335	7.46136	2.86e-06	0.00449434	0.326825	HYPER	chr1	229506493	+			II			NA	NA	rs149473786	0.0105	NA	NA		OpenSea																chr1:229506345-229506955	3
cg16701167	7.46072	2.86e-06	0.00449434	0.193886	HYPER	chr6	84141234	-		ME1	I	A	Red	NA	NA	NA	NA	NA	NA	chr6:84140412-84140998	S_Shore	NM_002395	TSS1500					6:84197138-84198078	6:84141175-84141408	Unclassified_Cell_type_specific	ME1;ME1;ME1	ENST00000541327.1;ENST00000369705.3;ENST00000543031.1	TSS1500;TSS1500;TSS1500	ME1;ME1;ME1	ENST00000541327.1;ENST00000369705.3;ENST00000543031.1	TSS1500;TSS1500;TSS1500	chr6:84141160-84141555	3						TRUE
cg26809516	7.4599	2.86e-06	0.00449434	0.0591954	HYPER	chr5	178804384	+			II			NA	NA	NA	NA	NA	NA	chr5:178801298-178801816	S_Shelf										RP11-443C10.2	ENST00000520163.1	TSS200	RP11-443C10.2	ENST00000520163.1	TSS200	chr5:178803825-178804835	3
cg14075424	7.45657	2.88e-06	0.00449967	0.225862	HYPER	chr19	13988235	+	NANOS3	NANOS3	I	A	Red	NA	NA	NA	NA	NA	NA	chr19:13988204-13988559	Island	NM_001098622	1stExon					19:13849235-13849439			NANOS3;NANOS3	ENST00000339133.4;ENST00000397555.2	1stExon;ExonBnd	NANOS3;NANOS3	ENST00000339133.4;ENST00000397555.2	1stExon;ExonBnd	chr19:13987725-13988635	3						TRUE
cg09944073	7.45593	2.88e-06	0.00449967	0.207293	HYPER	chr16	69139183	-		HAS3;HAS3	II			NA	NA	NA	NA	NA	NA	chr16:69139628-69141900	N_Shore	NM_001199280;NM_138612	TSS1500;TSS1500						16:69139112-69139633	Unclassified_Cell_type_specific	HAS3;HAS3;HAS3	ENST00000569188.1;ENST00000568321.1;ENST00000219322.3	TSS1500;TSS1500;TSS1500	HAS3;HAS3;HAS3;HAS3	ENST00000569188.1;ENST00000568321.1;ENST00000219322.3;ENST00000566118.1	TSS1500;TSS1500;TSS1500;TSS1500	chr16:69139165-69139975	3
cg20041614	7.45522	2.88e-06	0.00449967	0.0655714	HYPER	chr6	27598506	+			II			NA	NA	NA	NA	NA	NA	chr6:27598687-27599146	N_Shore										TRNAI6	ENST00000458896.1	TSS1500	TRNAI6	ENST00000458896.1	TSS1500					chr6:27598287-27599887	6
cg23555340	7.45199	2.9e-06	0.00450386	0.127811	HYPER	chr14	105865269	-	TEX22		I	A	Red	NA	NA	NA	NA	NA	NA	chr14:105864480-105865465	Island							14:104935526-104936413			TEX22	ENST00000451127.2	5'UTR	TEX22;TEX22	ENST00000548638.1;ENST00000451127.2	5'UTR;5'UTR	chr14:105863825-105865990	3						TRUE
cg19380361	7.45198	2.9e-06	0.00450386	0.217955	HYPER	chr15	85290890	+		ZNF592	I	A	Red	NA	NA	NA	NA	NA	NA	chr15:85291079-85291697	N_Shore	NM_014630	TSS1500						15:85290801-85292638	Promoter_Associated	ZNF592	ENST00000560079.2	TSS1500	ZNF592	ENST00000560079.2	TSS1500	chr15:85290620-85291910	3						TRUE
cg19677300	7.45073	2.9e-06	0.00450386	0.0455832	HYPER	chr2	2905086	-	AC019118.2	LINC01250	II			NA	NA	NA	NA	NA	NA		OpenSea	NR_110228	Body								AC019118.2	ENST00000457478.1	3'UTR	AC019118.2	ENST00000457478.1	3'UTR			chr2:2904787-2906288	6	chr2:2904750-2906661	6
cg13196697	-7.44673	2.92e-06	0.00451946	-0.270292	HYPO	chr1	198647817	+	PTPRC	PTPRC;PTPRC;PTPRC;PTPRC	II			rs12093318	0.054054	NA	NA	NA	NA		OpenSea	NR_052021;NM_001267798;NM_080921;NM_002838	Body;Body;Body;Body		chr1:198647552-198647552						PTPRC	ENST00000529828.1	5'UTR	PTPRC;PTPRC;PTPRC	ENST00000462363.2;ENST00000529828.1;ENST00000391970.3	5'UTR;5'UTR;5'UTR			chr1:198647504-198648439	6	chr1:198647579-198650002	6
cg06688733	7.44287	2.94e-06	0.00451946	0.210938	HYPER	chr5	42813842	-	SEPP1		II			NA	NA	NA	NA	NA	NA		OpenSea							5:42849555-42849725			SEPP1	ENST00000506577.1	5'UTR	SEPP1;SEPP1	ENST00000506577.1;ENST00000514218.1	5'UTR;5'UTR	chr5:42813720-42813995	3						TRUE
cg03335125	-7.44215	2.94e-06	0.00451946	-0.178572	HYPO	chr1	46088541	-	CCDC17	CCDC17	I	C	Grn	NA	NA	NA	NA	NA	NA	chr1:46088194-46089142	Island	NM_001114938	Body					1:45860782-45861713			CCDC17	ENST00000464739.1	TSS200	CCDC17;CCDC17;CCDC17;CCDC17;CCDC17	ENST00000464739.1;ENST00000372044.3;ENST00000482416.1;ENST00000491755.1;ENST00000525599.1	TSS200;3'UTR;3'UTR;3'UTR;3'UTR	chr1:46087745-46089050	3						TRUE
cg05890021	-7.44054	2.95e-06	0.00451946	-0.13988	HYPO	chr9	112685896	+	PALM2,PALM2-AKAP2,AKAP2	PALM2;PALM2;PALM2-AKAP2;PALM2-AKAP2	II			NA	NA	NA	NA	NA	NA		OpenSea	NM_001037293;NM_053016;NM_007203;NM_147150	Body;Body;Body;Body				TRUE							PALM2	ENST00000465091.1	5'UTR	chr9:112685740-112686075	3
cg06250135	7.43894	2.96e-06	0.00451946	0.0983001	HYPER	chr8	26481822	+	DPYSL2	DPYSL2	II			NA	NA	NA	NA	NA	NA		OpenSea	NM_001386	Body	low-CpG:26537574-26537741							DPYSL2;DPYSL2	ENST00000521913.1;ENST00000545637.1	ExonBnd;5'UTR	DPYSL2;DPYSL2;DPYSL2;DPYSL2	ENST00000523093.1;ENST00000523093.1;ENST00000521913.1;ENST00000545637.1	1stExon;5'UTR;ExonBnd;5'UTR								TRUE
cg05053920	7.43766	2.96e-06	0.00451946	0.221375	HYPER	chr13	110052892	+		LINC00399	II			NA	NA	NA	NA	NA	NA		OpenSea	NR_126361	TSS200								RP11-460H14.1	ENST00000439008.1	TSS200	RP11-460H14.1	ENST00000439008.1	TSS200	chr13:110052645-110052930	3
cg17960080	7.4375	2.96e-06	0.00451946	0.146671	HYPER	chr17	26926868	-	RP11-192H23.4,SPAG5-AS1	SPAG5	II			NA	NA	NA	NA	NA	NA	chr17:26925742-26926512	S_Shore	NM_006461	TSS1500					17:23950865-23951057	17:26925482-26927115	Promoter_Associated	SPAG5-AS1;SPAG5;SPAG5;AC005726.6;SPAG5-AS1	ENST00000556050.1;ENST00000536674.1;ENST00000321765.4;ENST00000378976.3;ENST00000554154.1	5'UTR;TSS1500;TSS1500;3'UTR;5'UTR	SPAG5-AS1;SPAG5;SPAG5;AC005726.6;SPAG5-AS1;SPAG5-AS1	ENST00000556050.1;ENST00000536674.1;ENST00000321765.4;ENST00000378976.3;ENST00000414744.1;ENST00000554154.1	5'UTR;TSS1500;TSS1500;3'UTR;5'UTR;5'UTR	chr17:26926220-26927155	3						TRUE
cg23510258	7.43709	2.97e-06	0.00451946	0.284861	HYPER	chr17	80840821	-	TBCD	TBCD	I	C	Grn	NA	NA	NA	NA	NA	NA		OpenSea	NM_005993	Body		chr17:80840475-80840475			17:78434025-78435097	17:80840237-80841795	Promoter_Associated_Cell_type_specific	TBCD	ENST00000269368.8	3'UTR	TBCD;TBCD;TBCD;TBCD;TBCD	ENST00000571316.1;ENST00000576160.1;ENST00000571712.1;ENST00000576996.1;ENST00000269368.8	TSS1500;5'UTR;5'UTR;5'UTR;3'UTR	chr17:80840625-80840855	3						TRUE
cg21557724	7.43697	2.97e-06	0.00451946	0.335543	HYPER	chr2	3317928	-	TSSC1	TSSC1	I	C	Grn	NA	NA	NA	NA	NA	NA	chr2:3317676-3317935	Island	NM_003310	Body				TRUE	2:3296809-3296942			TSSC1	ENST00000478754.1	3'UTR	TSSC1;TSSC1;TSSC1	ENST00000478754.1;ENST00000463662.1;ENST00000406835.2	3'UTR;3'UTR;3'UTR	chr2:3317685-3318130	3						TRUE
cg06264060	7.42831	3.01e-06	0.00456934	0.279122	HYPER	chr22	41075007	-	MCHR1	MCHR1	II			rs41281279	0.010522	NA	NA	NA	NA		OpenSea	NM_005297	TSS200								MCHR1;MCHR1;MCHR1	ENST00000249016.4;ENST00000249016.4;ENST00000381433.2	5'UTR;1stExon;TSS1500	MCHR1;MCHR1;MCHR1;MCHR1	ENST00000249016.4;ENST00000249016.4;ENST00000381433.2;ENST00000465662.1	5'UTR;1stExon;TSS1500;TSS1500	chr22:41074485-41075035	3					TRUE	TRUE
cg06984198	7.42731	3.01e-06	0.00456934	0.267238	HYPER	chr9	114247006	+	KIAA0368	KIAA0368	II			NA	NA	NA	NA	NA	NA	chr9:114245044-114246784	S_Shore	NM_001080398	1stExon								KIAA0368;KIAA0368	ENST00000338205.4;ENST00000259335.4	TSS1500;1stExon	KIAA0368;KIAA0368	ENST00000338205.4;ENST00000259335.4	TSS1500;1stExon	chr9:114246005-114247095	3
cg18638510	-7.42436	3.02e-06	0.00458128	-0.260763	HYPO	chr9	37387214	+			II			rs7025809	0.429697	NA	NA	NA	NA		OpenSea																chr9:37387060-37387275	3
cg12557393	7.42065	3.04e-06	0.00459365	0.224227	HYPER	chr3	158976957	-	IQCJ-SCHIP1,IQCJ	IQCJ;IQCJ;IQCJ;IQCJ-SCHIP1;IQCJ-SCHIP1	II			NA	NA	NA	NA	NA	NA		OpenSea	NM_001042706;NM_001042705;NM_001197100;NM_001197114;NM_001197113	Body;Body;Body;Body;Body								IQCJ;IQCJ-SCHIP1	ENST00000481796.1;ENST00000467442.1	5'UTR;5'UTR	IQCJ;IQCJ-SCHIP1	ENST00000481796.1;ENST00000467442.1	5'UTR;5'UTR			chr3:158976851-158976976	3	chr3:158976740-158977098	4
cg06694435	7.4201	3.04e-06	0.00459365	0.152943	HYPER	chr13	25788013	-			II			NA	NA	NA	NA	NA	NA		OpenSea																chr13:25787785-25788195	3
cg06366587	7.41674	3.06e-06	0.00459521	0.515835	HYPER	chr13	31675882	-	WDR95P		II			rs75043376	0.118535	NA	NA	NA	NA		OpenSea						TRUE										chr13:31675625-31675975	3
cg07976816	7.41573	3.07e-06	0.00459521	0.106915	HYPER	chr4	6883843	+	KIAA0232	KIAA0232;KIAA0232	I	A	Red	NA	NA	NA	NA	NA	NA		OpenSea	NM_001100590;NM_014743	3'UTR;3'UTR					4:6934700-6934773			KIAA0232;KIAA0232	ENST00000307659.5;ENST00000425103.1	3'UTR;3'UTR	KIAA0232;KIAA0232	ENST00000307659.5;ENST00000425103.1	3'UTR;3'UTR								TRUE
cg01830726	7.41554	3.07e-06	0.00459521	0.202676	HYPER	chr13	113411110	-	ATP11A	ATP11A;ATP11A	II			NA	NA	NA	NA	NA	NA	chr13:113410004-113410362	S_Shore	NM_015205;NM_032189	Body;Body					13:112459076-112459220			ATP11A	ENST00000466946.1	5'UTR	ATP11A	ENST00000466946.1	5'UTR	chr13:113411020-113411310	3						TRUE
cg04633888	7.41444	3.07e-06	0.00459521	0.201263	HYPER	chr17	77893070	+	RP11-353N14.5	LOC101928738;LOC101928766	II			NA	NA	NA	NA	NA	NA		OpenSea	NR_110851;NR_110850	TSS200;Body								RP11-353N14.4;RP11-353N14.4;RP11-353N14.5	ENST00000574526.1;ENST00000572353.1;ENST00000576738.1	TSS200;TSS200;3'UTR	RP11-353N14.4;RP11-353N14.4;RP11-353N14.5	ENST00000574526.1;ENST00000572353.1;ENST00000576738.1	TSS200;TSS200;3'UTR	chr17:77892820-77893335	3
cg11862081	7.41332	3.08e-06	0.00459521	0.0815976	HYPER	chr11	66625106	+	PC,LRFN4	PC;LRFN4;PC;LRFN4;PC	II			NA	NA	NA	NA	NA	NA	chr11:66623620-66626614	Island	NM_022172;NM_024036;NM_000920;NM_024036;NM_001040716	Body;5'UTR;Body;1stExon;Body						11:66625102-66625651	Promoter_Associated	LRFN4;LRFN4;LRFN4;LRFN4;LRFN4;LRFN4	ENST00000531590.1;ENST00000393952.3;ENST00000309602.4;ENST00000309602.4;ENST00000525479.1;ENST00000525479.1	5'UTR;5'UTR;5'UTR;1stExon;5'UTR;1stExon	LRFN4;LRFN4;LRFN4;LRFN4;LRFN4;LRFN4	ENST00000531590.1;ENST00000393952.3;ENST00000309602.4;ENST00000309602.4;ENST00000525479.1;ENST00000525479.1	5'UTR;5'UTR;5'UTR;1stExon;5'UTR;1stExon	chr11:66623065-66626015	3						TRUE
cg16190718	7.41128	3.09e-06	0.00459521	0.1336	HYPER	chr6	31939106	+	DXO,STK19	STK19;STK19;DOM3Z;STK19	II			NA	NA	NA	NA	NA	NA	chr6:31939730-31940559	N_Shore	NM_032454;NM_004197;NM_005510;NR_026717	TSS1500;TSS1500;Body;Body					6:32046826-32047302			DOM3Z;STK19;STK19;XXbac-BPG116M5.15;DOM3Z;DOM3Z	ENST00000478221.1;ENST00000375331.2;ENST00000375333.2;ENST00000519179.1;ENST00000337523.5;ENST00000375356.3	3'UTR;TSS1500;TSS1500;TSS1500;ExonBnd;1stExon	DOM3Z;DOM3Z;DOM3Z;DOM3Z;DOM3Z;DOM3Z;DOM3Z;STK19;STK19;DOM3Z;STK19;DOM3Z;DOM3Z;STK19;STK19;STK19;STK19;STK19;DOM3Z;STK19;STK19;STK19;STK19;DOM3Z;STK19;DOM3Z;DOM3Z;DOM3Z;DOM3Z;DOM3Z;DOM3Z;DOM3Z;STK19	ENST00000491327.1;ENST00000485557.1;ENST00000477826.1;ENST00000473976.1;ENST00000478221.1;ENST00000498357.1;ENST00000474587.1;ENST00000479644.1;ENST00000492583.1;ENST00000492946.1;ENST00000375333.2;ENST00000477826.1;ENST00000487914.1;ENST00000473983.1;ENST00000478486.1;ENST00000463823.1;ENST00000483801.1;ENST00000466336.1;ENST00000460058.1;ENST00000471028.1;ENST00000491861.1;ENST00000484540.1;ENS…	3'UTR;3'UTR;3'UTR;3'UTR;3'UTR;3'UTR;3'UTR;TSS1500;TSS1500;3'UTR;TSS1500;1stExon;3'UTR;TSS1500;TSS1500;TSS1500;TSS1500;TSS1500;3'UTR;TSS1500;TSS1500;TSS1500;TSS1500;TSS1500;5'UTR;ExonBnd;1stExon;1stExon;1stExon;1stExon;1stExon;1stExon;5'UTR	chr6:31938700-31939175	3						TRUE
cg10632728	7.41045	3.09e-06	0.00459521	0.189639	HYPER	chr1	18875315	-			II			NA	NA	NA	NA	NA	NA		OpenSea						TRUE										chr1:18875265-18875575	3						TRUE
cg03529333	7.40994	3.09e-06	0.00459521	0.143419	HYPER	chr3	193721536	-	RP11-699L21.2	LOC647323	II			NA	NA	rs116555555	0.012163	rs116555555	0.012163	chr3:193720953-193721291	S_Shore	NR_033944	TSS200				TRUE				RP11-699L21.1;RP11-699L21.2	ENST00000397645.2;ENST00000426616.1	TSS200;5'UTR	RP11-699L21.1;RP11-699L21.1;RP11-699L21.2	ENST00000414309.1;ENST00000397645.2;ENST00000426616.1	TSS200;TSS200;5'UTR	chr3:193720800-193721795	3
cg04173154	7.40643	3.11e-06	0.00461141	0.253906	HYPER	chr16	66257231	-			II			NA	NA	NA	NA	NA	NA		OpenSea						TRUE										chr16:66257080-66257635	3						TRUE
cg00047287	7.40139	3.13e-06	0.00463856	0.224641	HYPER	chr22	51016899	+	CPT1B,CHKB-CPT1B	CPT1B;CPT1B;CPT1B;CHKB-CPT1B;CPT1B;CPT1B;CPT1B;CPT1B	II			NA	NA	NA	NA	NA	NA	chr22:51016253-51017020	Island	NM_152246;NM_001145137;NM_001145135;NR_027928;NM_152245;NM_001145136;NM_001145134;NM_004377	TSS200;TSS1500;5'UTR;Body;5'UTR;5'UTR;5'UTR;TSS200				TRUE	22:49363077-49363870	22:51016564-51016973	Unclassified_Cell_type_specific	CHKB-CPT1B;CPT1B;CHKB-CPT1B;CPT1B;CPT1B;CPT1B;CPT1B	ENST00000453634.1;ENST00000434492.2;ENST00000452668.1;ENST00000440709.1;ENST00000405237.3;ENST00000312108.7;ENST00000395650.2	3'UTR;5'UTR;3'UTR;5'UTR;TSS1500;TSS200;TSS200	CHKB-CPT1B;CPT1B;CHKB-CPT1B;CPT1B;CPT1B;CPT1B;CPT1B;CPT1B;CPT1B;CPT1B;CHKB-CPT1B	ENST00000453634.1;ENST00000434492.2;ENST00000452668.1;ENST00000440709.1;ENST00000461117.1;ENST00000405237.3;ENST00000312108.7;ENST00000417176.1;ENST00000395650.2;ENST00000460853.1;ENST00000492556.1	3'UTR;5'UTR;3'UTR;5'UTR;TSS1500;TSS1500;TSS200;TSS1500;TSS200;TSS200;3'UTR	chr22:51016525-51017195	3						TRUE
cg27094252	7.39909	3.14e-06	0.00464336	0.137049	HYPER	chr14	101125627	-	LINC00523	LINC00523	II			NA	NA	NA	NA	NA	NA		OpenSea	NR_024096	Body								LINC00523;LINC00523;LINC00523	ENST00000553623.1;ENST00000556697.1;ENST00000360899.2	5'UTR;5'UTR;5'UTR	LINC00523;LINC00523;LINC00523	ENST00000553623.1;ENST00000556697.1;ENST00000360899.2	5'UTR;5'UTR;5'UTR	chr14:101125500-101126375	3
cg17520539	7.39818	3.15e-06	0.00464336	0.135552	HYPER	chr6	151560927	-		AKAP12	II			NA	NA	NA	NA	NA	NA	chr6:151560766-151560993	Island	NM_005100	TSS1500					6:151602460-151604420			AKAP12;AKAP12	ENST00000402676.2;ENST00000253332.1	TSS1500;TSS1500	AKAP12;AKAP12	ENST00000402676.2;ENST00000253332.1	TSS1500;TSS1500	chr6:151560805-151561210	3						TRUE
cg01811307	-7.39705	3.15e-06	0.00464336	-0.232296	HYPO	chr13	111550174	-	ANKRD10,ANKRD10-IT1	ANKRD10;ANKRD10;ANKRD10;ANKRD10	II			rs34852916	0.065693	NA	NA	NA	NA		OpenSea	NR_104586;NM_001286721;NR_104587;NM_017664	Body;Body;Body;Body								ANKRD10-IT1;ANKRD10	ENST00000426991.1;ENST00000494859.1	3'UTR;3'UTR	ANKRD10;ANKRD10;ANKRD10-IT1;ANKRD10;ANKRD10	ENST00000465753.1;ENST00000475809.1;ENST00000426991.1;ENST00000489973.1;ENST00000494859.1	3'UTR;3'UTR;3'UTR;3'UTR;3'UTR					chr13:111547991-111551400	3
cg17499822	-7.39269	3.18e-06	0.00466594	-0.236234	HYPO	chr1	3696143	-			II			NA	NA	NA	NA	NA	NA		OpenSea							1:3685915-3686243											chr1:3686205-3697213	6	chr1:3686912-3701343	6		TRUE
cg03515871	7.38856	3.2e-06	0.00468702	0.190394	HYPER	chr12	132913728	-			II			NA	NA	NA	NA	NA	NA	chr12:132910476-132910802	S_Shelf							12:131423675-131424149	12:132913531-132913783	Unclassified_Cell_type_specific									chr12:132912229-132919443	6				TRUE
cg23487081	7.37873	3.25e-06	0.00474421	0.229194	HYPER	chr7	44142094	+			II			NA	NA	NA	NA	NA	NA		OpenSea				chr7:44141919-44141919				7:44142056-44142321	Unclassified_Cell_type_specific							chr7:44141905-44142755	3
cg21684654	7.37829	3.25e-06	0.00474421	0.0848	HYPER	chr7	100203651	+	PCOLCE	PCOLCE	II			NA	NA	NA	NA	NA	NA	chr7:100201614-100203652	Island	NM_002593	Body											PCOLCE;PCOLCE	ENST00000472348.1;ENST00000486440.1	TSS200;5'UTR			chr7:100199583-100203969	6	chr7:100199595-100203740	6		TRUE
cg19638176	7.37226	3.28e-06	0.0047505	0.0847636	HYPER	chr19	12782961	+	WDR83	MORG1;MORG1;MORG1	II			NA	NA	NA	NA	NA	NA	chr19:12779795-12781094	S_Shore	NM_001099737;NR_029375;NM_032332	Body;Body;Body						19:12782861-12783195	Unclassified				WDR83;WDR83;WDR83;WDR83;WDR83;WDR83;WDR83	ENST00000547255.1;ENST00000551329.1;ENST00000553179.1;ENST00000548381.1;ENST00000547481.1;ENST00000552700.1;ENST00000546754.1	5'UTR;5'UTR;3'UTR;3'UTR;3'UTR;TSS200;5'UTR	chr19:12782880-12783135	3						TRUE
cg01387450	7.37154	3.28e-06	0.0047505	0.263004	HYPER	chr2	23839710	-	KLHL29	KLHL29	I	C	Grn	rs35679492	0.396175	NA	NA	NA	NA		OpenSea	NM_052920	Body					2:23693186-23693353						KLHL29	ENST00000489446.1	5'UTR	chr2:23839605-23839955	3						TRUE
cg15247526	7.37098	3.28e-06	0.0047505	0.126936	HYPER	chr1	117039205	-	RP5-1086K13.1		II			NA	NA	NA	NA	NA	NA		OpenSea						TRUE				RP5-1086K13.1;RP4-655J12.5	ENST00000456414.1;ENST00000439755.1	3'UTR;3'UTR	RP5-1086K13.1;RP4-655J12.5	ENST00000456414.1;ENST00000439755.1	3'UTR;3'UTR	chr1:117039005-117039310	3
cg04142955	7.37036	3.29e-06	0.0047505	0.252059	HYPER	chr6	31939181	-	DXO,STK19	STK19;STK19;DOM3Z;STK19	I	A	Red	NA	NA	NA	NA	NA	NA	chr6:31939730-31940559	N_Shore	NM_032454;NM_004197;NM_005510;NR_026717	TSS1500;TSS1500;Body;Body					6:32046826-32047302			DOM3Z;STK19;STK19;XXbac-BPG116M5.15;DOM3Z	ENST00000478221.1;ENST00000375331.2;ENST00000375333.2;ENST00000519179.1;ENST00000375356.3	3'UTR;TSS1500;TSS1500;TSS1500;1stExon	DOM3Z;DOM3Z;DOM3Z;DOM3Z;DOM3Z;DOM3Z;DOM3Z;STK19;STK19;DOM3Z;STK19;DOM3Z;DOM3Z;STK19;STK19;STK19;STK19;STK19;DOM3Z;STK19;STK19;STK19;STK19;DOM3Z;STK19;DOM3Z;DOM3Z;DOM3Z;DOM3Z;DOM3Z;DOM3Z;STK19	ENST00000491327.1;ENST00000485557.1;ENST00000477826.1;ENST00000473976.1;ENST00000478221.1;ENST00000498357.1;ENST00000474587.1;ENST00000479644.1;ENST00000492583.1;ENST00000492946.1;ENST00000375333.2;ENST00000477826.1;ENST00000487914.1;ENST00000473983.1;ENST00000478486.1;ENST00000463823.1;ENST00000483801.1;ENST00000466336.1;ENST00000460058.1;ENST00000471028.1;ENST00000491861.1;ENST00000484540.1;ENS…	3'UTR;3'UTR;3'UTR;3'UTR;3'UTR;3'UTR;3'UTR;TSS1500;TSS1500;3'UTR;TSS1500;1stExon;3'UTR;TSS1500;TSS1500;TSS1500;TSS1500;TSS1500;3'UTR;TSS1500;TSS1500;TSS1500;TSS1500;TSS1500;5'UTR;1stExon;1stExon;1stExon;1stExon;1stExon;1stExon;5'UTR			chr6:31938142-31941185	6	chr6:31936245-31941585	6		TRUE
cg05498618	7.36932	3.29e-06	0.0047505	0.221199	HYPER	chr9	36036451	-	RECK	RECK	II			NA	NA	NA	NA	NA	NA	chr9:36036798-36037564	N_Shore	NM_021111	TSS1500						9:36036399-36038083	Promoter_Associated	RECK;RECK;RECK	ENST00000479053.1;ENST00000377966.3;ENST00000377966.3	TSS1500;5'UTR;1stExon	RECK;RECK;RECK;RECK	ENST00000475774.1;ENST00000479053.1;ENST00000377966.3;ENST00000377966.3	TSS1500;TSS1500;5'UTR;1stExon	chr9:36036405-36036630	3
cg00681705	7.3691	3.29e-06	0.0047505	0.118663	HYPER	chr1	10056840	+		RBP7	II			NA	NA	NA	NA	NA	NA	chr1:10057121-10058108	N_Shore	NM_052960	TSS1500						1:10056457-10058087	Unclassified_Cell_type_specific	RBP7;RBP7	ENST00000315901.3;ENST00000294435.7	TSS1500;TSS1500	RBP7;RBP7	ENST00000315901.3;ENST00000294435.7	TSS1500;TSS1500	chr1:10056445-10058135	3
cg15709714	7.36903	3.29e-06	0.0047505	0.143814	HYPER	chr9	136498328	-			I	C	Grn	NA	NA	rs112037945	0.012351	NA	NA		OpenSea										LL09NC01-254D11.1	ENST00000564021.1	TSS200	LL09NC01-254D11.1	ENST00000564021.1	TSS200	chr9:136497780-136498355	3
cg26599630	7.36649	3.31e-06	0.00475637	0.184832	HYPER	chr1	4718212	+	AJAP1	AJAP1;AJAP1	I	A	Red	NA	NA	NA	NA	NA	NA	chr1:4713989-4716555	S_Shore	NM_018836;NM_001042478	Body;Body			RDMR	TRUE										chr1:4717980-4718995	3						TRUE
cg01612883	7.36585	3.31e-06	0.00475637	0.0979615	HYPER	chr12	125023115	+	NCOR2		II			NA	NA	NA	NA	NA	NA	chr12:125023589-125023809	N_Shore						TRUE		12:125023099-125023495	Unclassified_Cell_type_specific				NCOR2;NCOR2	ENST00000542565.1;ENST00000458234.1	3'UTR;5'UTR	chr12:125022820-125023215	3						TRUE
cg14563558	-7.36443	3.32e-06	0.00475795	-0.0923728	HYPO	chr11	1324024	-	TOLLIP	TOLLIP	II			NA	NA	NA	NA	NA	NA		OpenSea	NM_019009	Body								TOLLIP	ENST00000527886.1	TSS200	TOLLIP;TOLLIP;TOLLIP;TOLLIP;TOLLIP;TOLLIP	ENST00000527886.1;ENST00000527746.1;ENST00000527638.1;ENST00000532551.1;ENST00000530821.1;ENST00000527085.1	TSS200;3'UTR;3'UTR;3'UTR;3'UTR;3'UTR	chr11:1323665-1324270	3
cg20504446	7.36327	3.32e-06	0.00475795	0.326428	HYPER	chr13	43875048	-	ENOX1	ENOX1;ENOX1;ENOX1	II			NA	NA	NA	NA	NA	NA		OpenSea	NM_001127615;NM_001242863;NM_017993	Body;Body;Body														chr13:43875025-43875350	3
cg02556564	7.35928	3.34e-06	0.00477866	0.300011	HYPER	chr6	140923755	-			II			rs78684617	0.040256	NA	NA	NA	NA		OpenSea																				chr6:140923540-140924445	3
cg08377894	7.35748	3.35e-06	0.00478331	0.0883977	HYPER	chr11	72493889	-	ARAP1,STARD10	MIR4692;STARD10	II			NA	NA	NA	NA	NA	NA	chr11:72492281-72492644	S_Shore	NR_039841;NM_006645	TSS1500;5'UTR								STARD10;STARD10;STARD10;STARD10;ARAP1	ENST00000545082.1;ENST00000538536.1;ENST00000543304.1;ENST00000334805.6;ENST00000359373.5	TSS1500;5'UTR;5'UTR;5'UTR;5'UTR	STARD10;STARD10;STARD10;STARD10;STARD10;STARD10;STARD10;STARD10;STARD10;STARD10;STARD10;STARD10;STARD10;ARAP1	ENST00000539138.1;ENST00000542989.1;ENST00000535267.1;ENST00000535054.1;ENST00000545082.1;ENST00000537947.1;ENST00000546314.1;ENST00000536290.1;ENST00000538009.1;ENST00000536377.1;ENST00000538536.1;ENST00000543304.1;ENST00000334805.6;ENST00000359373.5	5'UTR;5'UTR;TSS1500;TSS1500;TSS1500;TSS1500;TSS1500;TSS1500;3'UTR;5'UTR;5'UTR;5'UTR;5'UTR;5'UTR	chr11:72493085-72494155	3
cg01439754	7.35629	3.36e-06	0.0047834	0.143784	HYPER	chr2	112293267	+			II			rs60683773	0.031471	NA	NA	NA	NA		OpenSea						TRUE										chr2:112292940-112293395	3						TRUE
cg26853640	7.35025	3.39e-06	0.00481421	0.0456184	HYPER	chr19	38879673	-	SPRED3	SPRED3;SPRED3;GGN	II			NA	NA	NA	NA	NA	NA	chr19:38876614-38878950	S_Shore	NM_001039616;NM_001042522;NM_152657	TSS1500;TSS1500;TSS1500					19:43571064-43571702			SPRED3;SPRED3;GGN	ENST00000338502.4;ENST00000396877.3;ENST00000334928.5	TSS1500;TSS1500;TSS1500	SPRED3;SPRED3;GGN	ENST00000338502.4;ENST00000396877.3;ENST00000334928.5	TSS1500;TSS1500;TSS1500			chr19:38874139-38883298	6	chr19:38868648-38880997	6	TRUE	TRUE
cg23081604	7.3498	3.39e-06	0.00481421	0.174033	HYPER	chr12	130824224	+	PIWIL1	PIWIL1	I	T	Red	NA	NA	NA	NA	NA	NA	chr12:130822360-130822696	S_Shore	NM_004764	5'UTR					12:129390177-129390384			PIWIL1	ENST00000245255.3	5'UTR	PIWIL1;PIWIL1;PIWIL1;PIWIL1;PIWIL1;PIWIL1	ENST00000535956.1;ENST00000245255.3;ENST00000546060.1;ENST00000539400.1;ENST00000539995.1;ENST00000535956.1	1stExon;5'UTR;5'UTR;5'UTR;5'UTR;5'UTR	chr12:130823305-130824915	3						TRUE
cg18492895	7.34641	3.41e-06	0.00483079	0.2087	HYPER	chr11	125301239	+	PKNOX2	PKNOX2	II			NA	NA	NA	NA	NA	NA		OpenSea	NM_022062	Body								PKNOX2	ENST00000535518.1	3'UTR	PKNOX2;PKNOX2;PKNOX2	ENST00000535518.1;ENST00000532623.1;ENST00000526955.1	3'UTR;3'UTR;5'UTR	chr11:125301200-125301455	3
cg25732410	-7.34427	3.42e-06	0.00483811	-0.132621	HYPO	chr3	32885242	-	TRIM71	TRIM71	II			NA	NA	NA	NA	NA	NA		OpenSea	NM_001039111	Body			RDMR											chr3:32884560-32885355	3						TRUE
cg12279087	-7.34268	3.43e-06	0.00483855	-0.380628	HYPO	chr3	116846937	-	LSAMP		II			NA	NA	NA	NA	NA	NA		OpenSea																				chr3:116846902-116847374	4
cg21340588	7.34047	3.44e-06	0.00483855	0.164224	HYPER	chr14	69246938	-			II			NA	NA	NA	NA	NA	NA		OpenSea				chr14:69246726-69246726		TRUE										chr14:69246445-69247015	3
cg13502195	-7.34018	3.44e-06	0.00483855	-0.219594	HYPO	chr14	63159927	-			II			NA	NA	NA	NA	NA	NA		OpenSea																		chr14:63157629-63161256	6
cg04944682	7.33916	3.45e-06	0.00483855	0.168129	HYPER	chr2	92262463	+			I	C	Grn	NA	NA	NA	NA	NA	NA	chr2:92260575-92263063	Island							2:91624325-91626760									chr2:92262205-92262530	3						TRUE
cg25350176	7.33752	3.46e-06	0.00483855	0.147742	HYPER	chr18	76275391	-			II			rs9963431	0.039096	NA	NA	NA	NA	chr18:76277579-76277827	N_Shelf							18:74376377-74376660									chr18:76275325-76275615	3						TRUE
cg21032266	7.33713	3.46e-06	0.00483855	0.142576	HYPER	chr14	74186279	-	ELMSAN1	C14orf43;C14orf43	II			rs79875771	0.122937	NA	NA	NA	NA	chr14:74185482-74185994	S_Shore	NM_194278;NM_001043318	Body;Body											C14orf43;C14orf43;C14orf43	ENST00000476562.1;ENST00000478847.1;ENST00000451078.1	3'UTR;3'UTR;3'UTR	chr14:74186085-74186475	3						TRUE
cg10025909	7.33459	3.47e-06	0.00483855	0.488052	HYPER	chr11	47562162	-	CELF1	CELF1	II			NA	NA	NA	NA	NA	NA		OpenSea	NM_006560	5'UTR				TRUE				CELF1;CELF1	ENST00000310513.5;ENST00000531165.1	5'UTR;5'UTR	CELF1;CELF1;CELF1;CELF1;CELF1	ENST00000310513.5;ENST00000531165.1;ENST00000525841.1;ENST00000530151.1;ENST00000526419.1	5'UTR;5'UTR;5'UTR;5'UTR;5'UTR	chr11:47561380-47562175	3
cg16430819	7.33347	3.48e-06	0.00483855	0.284307	HYPER	chr16	4000920	+			II			NA	NA	NA	NA	NA	NA		OpenSea							16:3940840-3940988	16:4000884-4001070	Unclassified_Cell_type_specific	RP11-462G12.1	ENST00000576810.1	TSS1500	RP11-462G12.1	ENST00000576810.1	TSS1500	chr16:4000225-4001235	3						TRUE
cg22293021	7.33312	3.48e-06	0.00483855	0.17737	HYPER	chr11	71140317	+	DHCR7		II			NA	NA	NA	NA	NA	NA		OpenSea																chr11:71139940-71140495	3
cg00231483	7.33266	3.49e-06	0.00483855	0.160335	HYPER	chr18	70211959	-	CBLN2	CBLN2	II			NA	NA	NA	NA	NA	NA	chr18:70208974-70211790	S_Shore	NM_182511	TSS1500			RDMR					CBLN2	ENST00000269503.4	TSS200	CBLN2	ENST00000269503.4	TSS200	chr18:70211905-70212055	3						TRUE
cg03292921	7.33013	3.5e-06	0.00484439	0.125758	HYPER	chr4	575111	+			II			NA	NA	NA	NA	NA	NA	chr4:570950-571768	S_Shelf																chr4:575000-575275	3
cg02600063	7.3296	3.5e-06	0.00484439	0.308738	HYPER	chr5	31193216	+	RP11-152K4.2	CDH6	II			NA	NA	NA	NA	NA	NA	chr5:31193952-31194419	N_Shore	NM_004932	TSS1500								CDH6;RP11-152K4.2	ENST00000514738.1;ENST00000523584.1	TSS1500;3'UTR	CDH6;CDH6;RP11-152K4.2	ENST00000514738.1;ENST00000506396.1;ENST00000523584.1	TSS1500;TSS1500;3'UTR	chr5:31192965-31193475	3
cg20322977	-7.32747	3.51e-06	0.00484997	-0.212757	HYPO	chr10	94821085	+	CYP26C1	CYP26C1	II			NA	NA	NA	NA	NA	NA	chr10:94820026-94823252	Island	NM_183374	1stExon					10:94809776-94811385			RP11-348J12.2;CYP26C1	ENST00000444965.1;ENST00000285949.5	TSS1500;1stExon	RP11-348J12.2;CYP26C1	ENST00000444965.1;ENST00000285949.5	TSS1500;1stExon	chr10:94820925-94821315	3					TRUE	TRUE
cg14986671	7.32658	3.52e-06	0.00484997	0.340956	HYPER	chr10	131667008	-	EBF3	EBF3	I	A	Red	NA	NA	NA	NA	NA	NA	chr10:131666016-131666315	S_Shore	NM_001005463	Body				TRUE										chr10:131666765-131667155	3						TRUE
cg05214550	-7.32375	3.53e-06	0.00485433	-0.266785	HYPO	chr9	92104726	-	SEMA4D		II			NA	NA	NA	NA	NA	NA		OpenSea						TRUE				SEMA4D;SEMA4D;SEMA4D	ENST00000339861.4;ENST00000422704.2;ENST00000455551.2	5'UTR;5'UTR;5'UTR	SEMA4D;SEMA4D;SEMA4D;SEMA4D	ENST00000420670.1;ENST00000339861.4;ENST00000422704.2;ENST00000455551.2	5'UTR;5'UTR;5'UTR;5'UTR			chr9:92104344-92104766	3	chr9:92104367-92105752	6
cg17551544	-7.32347	3.54e-06	0.00485433	-0.217949	HYPO	chr17	75686657	-			II			NA	NA	NA	NA	NA	NA		OpenSea								17:75686501-75686983	Unclassified_Cell_type_specific							chr17:75686365-75686975	3
cg20151215	7.32261	3.54e-06	0.00485433	0.15063	HYPER	chr3	126114349	+	CCDC37	CCDC37;CCDC37-AS1;CCDC37-AS1;CCDC37-AS1	II			NA	NA	NA	NA	NA	NA	chr3:126113547-126113967	S_Shore	NM_182628;NR_103789;NR_103788;NR_103787	5'UTR;TSS1500;TSS1500;TSS1500								CCDC37;RP11-71E19.5;RP11-71E19.5;CCDC37;RP11-71E19.5;CCDC37	ENST00000505024.1;ENST00000511287.1;ENST00000505467.1;ENST00000352312.1;ENST00000506660.1;ENST00000510833.1	TSS1500;TSS1500;TSS1500;5'UTR;TSS1500;5'UTR	CCDC37;RP11-71E19.5;RP11-71E19.5;CCDC37;RP11-71E19.5;CCDC37;CCDC37	ENST00000505024.1;ENST00000511287.1;ENST00000505467.1;ENST00000352312.1;ENST00000506660.1;ENST00000510833.1;ENST00000508140.1	TSS1500;TSS1500;TSS1500;5'UTR;TSS1500;5'UTR;5'UTR
cg12430467	7.32138	3.55e-06	0.00485509	0.140788	HYPER	chr15	30115299	-	TJP1,RP11-680F8.3	TJP1;TJP1	II			NA	NA	NA	NA	NA	NA	chr15:30113705-30113940	S_Shore	NM_175610;NM_003257	TSS1500;TSS1500								TJP1;RP11-680F8.3;TJP1;TJP1	ENST00000356107.6;ENST00000557989.1;ENST00000495972.2;ENST00000346128.6	TSS1500;5'UTR;TSS1500;TSS1500	TJP1;RP11-680F8.3;TJP1;TJP1;TJP1	ENST00000356107.6;ENST00000557989.1;ENST00000495972.2;ENST00000346128.6;ENST00000473741.1	TSS1500;5'UTR;TSS1500;TSS1500;3'UTR	chr15:30114820-30115590	3						TRUE
cg17748520	7.32011	3.55e-06	0.00485611	0.103794	HYPER	chr1	226298746	-			II			NA	NA	NA	NA	NA	NA	chr1:226297287-226298586	S_Shore							1:224364246-224365389	1:226298044-226298755	Promoter_Associated							chr1:226298305-226300115	3						TRUE
cg25725454	-7.31655	3.57e-06	0.00487455	-0.299387	HYPO	chr1	215883591	+	USH2A	USH2A	II			NA	NA	NA	NA	NA	NA		OpenSea	NM_206933	Body																chr1:215883407-215884201	6	chr1:215883263-215884460	6
cg22456272	7.31439	3.59e-06	0.00488247	0.126053	HYPER	chr20	62131338	-		EEF1A2	II			rs12479532	0.377971	NA	NA	NA	NA	chr20:62127243-62127735	S_Shelf	NM_001958	TSS1500								EEF1A2	ENST00000217182.3	TSS1500	EEF1A2	ENST00000217182.3	TSS1500			chr20:62121737-62135713	6
cg12728958	7.30896	3.62e-06	0.00491223	0.134197	HYPER	chr8	42947797	+		SGK196	II			NA	NA	NA	NA	NA	NA	chr8:42948532-42948928	N_Shore	NM_032237	TSS1500						8:42947795-42949316	Promoter_Associated	SGK196	ENST00000331373.5	TSS1500	SGK196;SGK196	ENST00000518991.1;ENST00000331373.5	TSS1500;TSS1500	chr8:42947745-42947895	3						TRUE
cg06749502	-7.30824	3.62e-06	0.00491223	-0.160617	HYPO	chr20	36558911	-	VSTM2L	VSTM2L	II			NA	NA	NA	NA	NA	NA		OpenSea	NM_080607	Body														chr20:36558665-36559135	3
cg05252213	7.30547	3.64e-06	0.00492132	0.0747882	HYPER	chr17	41755141	-			II			NA	NA	NA	NA	NA	NA		OpenSea						TRUE		17:41754399-41756264	Unclassified							chr17:41755085-41755535	3						TRUE
cg16473733	7.30483	3.64e-06	0.00492132	0.10609	HYPER	chr20	17512340	+	BFSP1	BFSP1;BFSP1;BFSP1;BFSP1;BFSP1	II			rs77881374	0.014323	NA	NA	NA	NA	chr20:17511478-17512209	S_Shore	NM_001195;NM_001161705;NM_001278607;NM_001278606;NM_001278608	TSS1500;Body;Body;5'UTR;5'UTR								BFSP1;BFSP1;BFSP1;BFSP1	ENST00000377873.3;ENST00000473415.1;ENST00000544874.1;ENST00000536626.1	TSS1500;3'UTR;5'UTR;5'UTR	BFSP1;BFSP1;BFSP1;BFSP1	ENST00000377873.3;ENST00000473415.1;ENST00000544874.1;ENST00000536626.1	TSS1500;3'UTR;5'UTR;5'UTR	chr20:17511205-17512415	3
cg12395025	-7.3007	3.66e-06	0.00493742	-0.336097	HYPO	chr18	52679383	-			II			NA	NA	NA	NA	NA	NA		OpenSea																chr18:52679240-52679670	3
cg07722580	7.30051	3.66e-06	0.00493742	0.315734	HYPER	chr16	85604047	-			II			NA	NA	NA	NA	NA	NA		OpenSea				chr16:85603902-85603902				16:85603200-85604873	Promoter_Associated							chr16:85603440-85604455	3
cg25624887	7.29541	3.69e-06	0.00496818	0.0586149	HYPER	chr3	45127073	+	CDCP1	CDCP1	II			NA	NA	NA	NA	NA	NA		OpenSea	NM_022842	3'UTR				TRUE		3:45126643-45127192	Unclassified_Cell_type_specific	CDCP1	ENST00000296129.1	3'UTR	CDCP1	ENST00000296129.1	3'UTR			chr3:45126688-45127179	4	chr3:45125414-45129177	6		TRUE
cg25484712	-7.28027	3.78e-06	0.00507808	-0.330157	HYPO	chr7	150828561	+	AGAP3	AGAP3	I	A	Red	rs181314300	0.0147	NA	NA	NA	NA		OpenSea	NM_031946	Body					7:150459485-150459532			AGAP3	ENST00000397232.1	5'UTR	AGAP3;AGAP3;AGAP3;AGAP3	ENST00000397232.1;ENST00000485904.1;ENST00000494808.1;ENST00000478320.1	5'UTR;5'UTR;5'UTR;5'UTR			chr7:150810168-150837407	6				TRUE
cg19811253	7.277	3.8e-06	0.00509528	0.0927852	HYPER	chr1	160332981	-			II			NA	NA	NA	NA	NA	NA		OpenSea						TRUE										chr1:160332605-160333215	3						TRUE
cg24742457	7.27497	3.81e-06	0.0050989	0.219177	HYPER	chr11	114107785	-	ZBTB16,RP11-64D24.2	ZBTB16;ZBTB16	II			NA	NA	NA	NA	NA	NA		OpenSea	NM_006006;NM_001018011	Body;Body								ZBTB16;RP11-64D24.2	ENST00000535379.1;ENST00000544925.1	TSS200;3'UTR	ZBTB16;ZBTB16;ZBTB16;RP11-64D24.2	ENST00000535379.1;ENST00000545851.1;ENST00000539918.1;ENST00000544925.1	TSS200;5'UTR;3'UTR;3'UTR	chr11:114107600-114107915	3
cg25806524	7.27435	3.82e-06	0.0050989	0.129647	HYPER	chr19	46998786	+	PPP5D1,PNMAL2,AC011484.1	PNMAL2;PNMAL2;PPP5D1	II			NA	NA	NA	NA	NA	NA	chr19:46996327-46998437	S_Shore	NM_020709;NM_020709;NM_001205281	1stExon;5'UTR;Body				TRUE	19:51688244-51691087	19:46998522-46998829	Unclassified_Cell_type_specific	AC011484.1;AC011484.1;PNMAL2	ENST00000377652.3;ENST00000377652.3;ENST00000377655.2	1stExon;3'UTR;TSS200	AC011484.1;AC011484.1;PNMAL2	ENST00000377652.3;ENST00000377652.3;ENST00000377655.2	1stExon;3'UTR;TSS200	chr19:46998785-46999295	3
cg05406088	7.27014	3.84e-06	0.00512372	0.211259	HYPER	chr15	66947617	+	RP11-321F6.1		I	T	Red	NA	NA	NA	NA	NA	NA	chr15:66947360-66947574	S_Shore						TRUE		15:66947084-66947651	Unclassified_Cell_type_specific							chr15:66946900-66947695	3						TRUE
cg03781262	7.26826	3.85e-06	0.00512999	0.225995	HYPER	chr19	58879871	-	ZNF837	ZNF837;ZNF837	II			NA	NA	NA	NA	NA	NA	chr19:58878386-58880634	Island	NM_001129730;NM_138466	Body;Body					19:63570834-63572417											chr19:58877029-58881706	6				TRUE
cg07195492	-7.26363	3.88e-06	0.00515311	-0.235566	HYPO	chr1	89450261	+	CCBL2,RBMXL1	CCBL2;CCBL2;RBMXL1;RBMXL1	II			NA	NA	rs17130676	0.035417	NA	NA		OpenSea	NM_001008661;NM_001008662;NM_001162536;NM_019610	Body;5'UTR;5'UTR;5'UTR						1:89449018-89450340	Unclassified	CCBL2;CCBL2;RBMXL1;RBMXL1;RBMXL1	ENST00000446900.2;ENST00000370491.3;ENST00000413769.1;ENST00000321792.5;ENST00000399794.2	3'UTR;5'UTR;3'UTR;5'UTR;5'UTR	CCBL2;CCBL2;RBMXL1;RBMXL1;RBMXL1	ENST00000446900.2;ENST00000370491.3;ENST00000413769.1;ENST00000321792.5;ENST00000399794.2	3'UTR;5'UTR;3'UTR;5'UTR;5'UTR	chr1:89450245-89450575	3
cg27188834	7.26309	3.88e-06	0.00515311	0.106676	HYPER	chr22	47447813	+	TBC1D22A	TBC1D22A;TBC1D22A;TBC1D22A;TBC1D22A;TBC1D22A	II			NA	NA	NA	NA	NA	NA		OpenSea	NM_001284304;NM_001284305;NM_001284303;NM_014346;NR_104292	Body;Body;Body;Body;Body				TRUE							TBC1D22A;TBC1D22A	ENST00000394449.2;ENST00000441162.1	3'UTR;3'UTR	chr22:47447785-47448170	3
cg01538891	7.26062	3.9e-06	0.00515311	0.156396	HYPER	chr3	126114078	+	CCDC37	CCDC37;CCDC37-AS1;CCDC37-AS1;CCDC37-AS1	II			NA	NA	NA	NA	NA	NA	chr3:126113547-126113967	S_Shore	NM_182628;NR_103789;NR_103788;NR_103787	5'UTR;TSS1500;TSS1500;TSS1500				TRUE				CCDC37;RP11-71E19.5;RP11-71E19.5;CCDC37;RP11-71E19.5;CCDC37	ENST00000505024.1;ENST00000511287.1;ENST00000505467.1;ENST00000352312.1;ENST00000506660.1;ENST00000510833.1	TSS1500;TSS1500;TSS1500;5'UTR;TSS1500;TSS200	CCDC37;RP11-71E19.5;RP11-71E19.5;CCDC37;RP11-71E19.5;CCDC37;CCDC37	ENST00000505024.1;ENST00000511287.1;ENST00000505467.1;ENST00000352312.1;ENST00000506660.1;ENST00000510833.1;ENST00000508140.1	TSS1500;TSS1500;TSS1500;5'UTR;TSS1500;TSS200;5'UTR			chr3:126112730-126114232	6
cg02452639	7.26005	3.9e-06	0.00515311	0.083845	HYPER	chr1	116710227	-			II			rs75696043	0.022415	NA	NA	NA	NA	chr1:116710157-116710546	Island						TRUE	1:116511728-116512802									chr1:116710185-116710415	3						TRUE
cg02246130	-7.25995	3.9e-06	0.00515311	-0.220464	HYPO	chr3	64547152	+	ADAMTS9,ADAMTS9-AS1	ADAMTS9	II			rs17071048	0.115448	NA	NA	NA	NA		OpenSea	NM_182920	Body					3:64522146-64522449			ADAMTS9-AS1;ADAMTS9-AS1;ADAMTS9-AS1;ADAMTS9-AS1;ADAMTS9-AS1	ENST00000474313.1;ENST00000493124.1;ENST00000480831.1;ENST00000480831.1;ENST00000466225.1	TSS1500;TSS1500;1stExon;5'UTR;TSS200	ADAMTS9-AS1;ADAMTS9-AS1;ADAMTS9-AS1;ADAMTS9-AS1;ADAMTS9-AS1;ADAMTS9-AS1;ADAMTS9-AS1;ADAMTS9-AS1;ADAMTS9	ENST00000474313.1;ENST00000493124.1;ENST00000480831.1;ENST00000480831.1;ENST00000470447.1;ENST00000492209.1;ENST00000466225.1;ENST00000470447.1;ENST00000482490.1	TSS1500;TSS1500;1stExon;5'UTR;1stExon;TSS200;TSS200;5'UTR;3'UTR	chr3:64546980-64547175	3						TRUE
cg02556117	7.25176	3.95e-06	0.00520337	0.127028	HYPER	chr19	5078275	-	KDM4B	KDM4B	II			NA	NA	NA	NA	NA	NA	chr19:5076031-5076905	S_Shore	NM_015015	Body														chr19:5077985-5078550	3
cg21241889	7.25056	3.96e-06	0.00520337	0.138297	HYPER	chr9	123690658	-	TRAF1	TRAF1	II			NA	NA	NA	NA	NA	NA	chr9:123690771-123691675	N_Shore	NM_005658	TSS1500			CDMR		9:122730479-122731496	9:123690593-123690734	Promoter_Associated	TRAF1;TRAF1;TRAF1	ENST00000373887.3;ENST00000540010.1;ENST00000373887.3	5'UTR;5'UTR;1stExon	TRAF1;TRAF1;TRAF1	ENST00000373887.3;ENST00000540010.1;ENST00000373887.3	5'UTR;5'UTR;1stExon	chr9:123690580-123690950	3						TRUE
cg05704248	7.2505	3.96e-06	0.00520337	0.211681	HYPER	chr4	6386500	+	PPP2R2C	PPP2R2C;PPP2R2C;PPP2R2C;PPP2R2C	II			NA	NA	NA	NA	NA	NA		OpenSea	NM_001206996;NM_020416;NM_001206995;NM_001206994	Body;Body;Body;Body								PPP2R2C	ENST00000314348.8	3'UTR	PPP2R2C;PPP2R2C;PPP2R2C;PPP2R2C	ENST00000513943.1;ENST00000513943.1;ENST00000314348.8;ENST00000507028.1	1stExon;3'UTR;3'UTR;3'UTR
cg04579625	7.24917	3.97e-06	0.00520547	0.193531	HYPER	chr18	73351495	-			II			NA	NA	NA	NA	NA	NA		OpenSea						TRUE										chr18:73351160-73351650	3
cg13892570	-7.24624	3.99e-06	0.00522065	-0.106281	HYPO	chr1	159893182	+	TAGLN2	TAGLN2	II			NA	NA	NA	NA	NA	NA	chr1:159894329-159895398	N_Shore	NM_003564	5'UTR			RDMR			1:159893107-159893722	Promoter_Associated	TAGLN2;TAGLN2;TAGLN2	ENST00000478033.1;ENST00000320307.4;ENST00000368097.4	3'UTR;5'UTR;5'UTR	TAGLN2;TAGLN2;TAGLN2;TAGLN2	ENST00000478033.1;ENST00000320307.4;ENST00000397334.2;ENST00000368097.4	3'UTR;5'UTR;5'UTR;5'UTR	chr1:159892685-159893375	3						TRUE
cg00274203	7.24269	4.01e-06	0.00522383	0.174576	HYPER	chr12	56661537	-	COQ10A	COQ10A;COQ10A	II			NA	NA	NA	NA	NA	NA	chr12:56660442-56661131	S_Shore	NM_001099337;NM_144576	Body;Body					12:54946738-54947805			COQ10A	ENST00000546544.1	1stExon	COQ10A;COQ10A;COQ10A;COQ10A;COQ10A;COQ10A;COQ10A	ENST00000549545.1;ENST00000551566.1;ENST00000551911.1;ENST00000550071.1;ENST00000546614.1;ENST00000553234.1;ENST00000546544.1	TSS1500;5'UTR;5'UTR;5'UTR;5'UTR;TSS200;1stExon	chr12:56661125-56661750	3						TRUE
cg14327698	-7.24269	4.01e-06	0.00522383	-0.259164	HYPO	chr2	15950003	+	AC113608.1		I	A	Red	rs13035745	0.232606	NA	NA	NA	NA		OpenSea				chr2:15949825-15949825		TRUE				AC113608.1	ENST00000448379.1	3'UTR	AC113608.1	ENST00000448379.1	3'UTR			chr2:15949058-15950480	6
cg26468264	7.24264	4.01e-06	0.00522383	0.406063	HYPER	chr5	92656892	+			II			NA	NA	NA	NA	NA	NA		OpenSea																chr5:92656725-92657030	3
cg17814030	7.24155	4.02e-06	0.00522407	0.397491	HYPER	chr11	63869164	-	MACROD1,RP11-21A7A.2	MACROD1	I	C	Grn	NA	NA	NA	NA	NA	NA		OpenSea	NM_014067	Body								FLRT1;RP11-21A7A.2	ENST00000246841.3;ENST00000537170.1	TSS1500;5'UTR	FLRT1;MACROD1;MACROD1;MACROD1;RP11-21A7A.2;RP11-21A7A.2	ENST00000246841.3;ENST00000543422.1;ENST00000545464.1;ENST00000542359.1;ENST00000537170.1;ENST00000538550.1	TSS1500;3'UTR;3'UTR;3'UTR;5'UTR;5'UTR	chr11:63868905-63869175	3
cg10381888	7.23712	4.05e-06	0.00523896	0.21987	HYPER	chr6	30228243	+	HCG17,HLA-L	HLA-L	I	A	Red	NA	NA	NA	NA	NA	NA	chr6:30227320-30228255	Island	NR_027822	Body					6:30335300-30336264	6:30226801-30228252	Promoter_Associated	HLA-L;HCG17	ENST00000463348.1;ENST00000453558.1	5'UTR;3'UTR	HLA-L;HLA-L;HCG17	ENST00000482052.1;ENST00000463348.1;ENST00000453558.1	5'UTR;5'UTR;3'UTR	chr6:30227845-30228295	3						TRUE
cg26426186	7.23571	4.05e-06	0.00523896	0.128253	HYPER	chr8	140632846	-	KCNK9	KCNK9	II			NA	NA	NA	NA	NA	NA	chr8:140631096-140631332	S_Shore	NM_016601	Body																chr8:140632584-140633134	3				TRUE
cg06784867	-7.23532	4.06e-06	0.00523896	-0.0460257	HYPO	chr1	205025508	-	CNTN2	CNTN2	II			NA	NA	NA	NA	NA	NA		OpenSea	NM_005076	Body											CNTN2	ENST00000532366.1	TSS1500	chr1:205025400-205025655	3
cg12468308	-7.23521	4.06e-06	0.00523896	-0.364297	HYPO	chr11	126887071	+			II			NA	NA	NA	NA	NA	NA		OpenSea								11:126886317-126888266	Unclassified_Cell_type_specific											chr11:126887061-126887846	6
cg17145047	7.23443	4.06e-06	0.00523896	0.297389	HYPER	chr2	17797594	-	VSNL1	VSNL1	II			NA	NA	NA	NA	NA	NA		OpenSea	NM_003385	Body																		chr2:17796434-17797707	6
cg20059982	-7.23222	4.08e-06	0.00524072	-0.21022	HYPO	chr1	94079693	+	BCAR3	BCAR3;BCAR3;BCAR3;BCAR3;BCAR3	II			NA	NA	NA	NA	NA	NA		OpenSea	NM_001261410;NM_001261410;NM_003567;NM_001261409;NM_001261408	1stExon;5'UTR;Body;Body;Body								BCAR3	ENST00000370247.3	TSS200	BCAR3;BCAR3	ENST00000370247.3;ENST00000479503.1	TSS200;3'UTR	chr1:94079225-94079815	3
cg17718377	7.2311	4.08e-06	0.00524072	0.0617045	HYPER	chr12	113495619	-	DTX1	DTX1	II			NA	NA	NA	NA	NA	NA	chr12:113494389-113495534	S_Shore	NM_004416	TSS200								DTX1;DTX1	ENST00000257600.3;ENST00000257600.3	5'UTR;1stExon	DTX1;DTX1;DTX1	ENST00000548759.1;ENST00000257600.3;ENST00000257600.3	5'UTR;5'UTR;1stExon	chr12:113495365-113496295	3						TRUE
cg16415646	-7.23106	4.08e-06	0.00524072	-0.302906	HYPO	chr7	41743001	-	AC005027.3,INHBA-AS1	LOC285954;LOC285954;INHBA	II			NA	NA	NA	NA	NA	NA	chr7:41745178-41745462	N_Shelf	NR_027118;NR_027119;NM_002192	Body;Body;TSS1500								INHBA;AC005027.3;AC005027.4;AC005027.4;AC005027.4	ENST00000242208.4;ENST00000416150.1;ENST00000422822.1;ENST00000420821.1;ENST00000415848.2	TSS1500;3'UTR;5'UTR;5'UTR;5'UTR	INHBA;AC005027.3;AC005027.4;AC005027.4;AC005027.4	ENST00000242208.4;ENST00000416150.1;ENST00000422822.1;ENST00000420821.1;ENST00000415848.2	TSS1500;3'UTR;5'UTR;5'UTR;5'UTR			chr7:41742580-41743006	3	chr7:41729053-41743054	6	TRUE	TRUE
cg08824129	7.22955	4.09e-06	0.00524201	0.0889912	HYPER	chr10	73220180	+	CDH23	CDH23;CDH23;CDH23;CDH23;CDH23	II			NA	NA	NA	NA	NA	NA		OpenSea	NM_001171932;NM_052836;NM_001171931;NM_001171930;NM_022124	Body;Body;Body;Body;Body								CDH23	ENST00000416060.2	5'UTR	CDH23;CDH23	ENST00000416060.2;ENST00000461841.2	5'UTR;5'UTR			chr10:73220068-73221514	6
cg01408363	7.22881	4.1e-06	0.00524201	0.139029	HYPER	chr12	125033903	+	NCOR2		I	A	Red	rs12423712	0.063632	NA	NA	NA	NA		OpenSea				chr12:125033431-125033431		TRUE	12:123599624-123600303						NCOR2;NCOR2	ENST00000542565.1;ENST00000458234.1	3'UTR;5'UTR	chr12:125033385-125034015	3						TRUE
cg01446571	-7.22749	4.11e-06	0.0052443	-0.10408	HYPO	chr17	39558499	+			II			NA	NA	NA	NA	NA	NA		OpenSea										AC003958.2;AC003958.2	ENST00000430006.1;ENST00000432258.1	TSS200;TSS200	AC003958.2;AC003958.2	ENST00000430006.1;ENST00000432258.1	TSS200;TSS200	chr17:39558420-39558875	3						TRUE
cg20417128	7.22545	4.12e-06	0.00525248	0.137073	HYPER	chr2	1690625	-	PXDN	PXDN	I	A	Red	NA	NA	NA	NA	NA	NA		OpenSea	NM_012293	Body				TRUE	2:1669571-1669748						PXDN	ENST00000485177.1	3'UTR	chr2:1690540-1690835	3						TRUE
cg08946713	-7.22127	4.15e-06	0.00527553	-0.294252	HYPO	chr2	191844998	+	STAT1	STAT1;STAT1	II			NA	NA	NA	NA	NA	NA		OpenSea	NM_139266;NM_007315	Body;Body				TRUE				STAT1;STAT1	ENST00000540176.1;ENST00000544783.1	3'UTR;3'UTR	STAT1;STAT1;STAT1;STAT1	ENST00000464072.1;ENST00000540176.1;ENST00000452281.1;ENST00000544783.1	3'UTR;3'UTR;3'UTR;3'UTR	chr2:191844685-191845575	3						TRUE
cg13963053	7.22058	4.15e-06	0.00527553	0.238171	HYPER	chr6	170540050	+			II			rs72503866	0.108941	NA	NA	NA	NA		OpenSea							6:170381892-170382245									chr6:170539885-170540255	3						TRUE
cg00372589	7.21932	4.16e-06	0.00527734	0.0269907	HYPER	chr6	33806027	+			II			NA	NA	NA	NA	NA	NA		OpenSea																		chr6:33805969-33806487	6
cg21015805	7.21704	4.17e-06	0.00528332	0.246039	HYPER	chr17	73080225	+			II			NA	NA	NA	NA	NA	NA	chr17:73083866-73084495	N_Shelf								17:73080125-73080590	Unclassified_Cell_type_specific							chr17:73079840-73080535	3						TRUE
cg24197567	-7.21653	4.18e-06	0.00528332	-0.130115	HYPO	chr7	116346853	-	MET	MET;MET	II			NA	NA	NA	NA	NA	NA		OpenSea	NM_001127500;NM_000245	Body;Body				TRUE										chr7:116346720-116346975	3						TRUE
cg14004768	7.21477	4.19e-06	0.00528933	0.0862601	HYPER	chr1	8484703	+	RERE	RERE;LOC102724552;RERE;RERE	II			NA	NA	NA	NA	NA	NA	chr1:8483389-8484339	S_Shore	NM_001042682;NR_125999;NM_001042681;NM_012102	TSS1500;TSS200;Body;Body								RERE;RP5-1115A15.1;RP5-1115A15.1	ENST00000476556.1;ENST00000444276.1;ENST00000449895.1	TSS1500;TSS1500;TSS200	RERE;RERE;RP5-1115A15.1;RERE;RP5-1115A15.1;RERE;RERE	ENST00000460659.1;ENST00000476556.1;ENST00000444276.1;ENST00000465125.1;ENST00000449895.1;ENST00000488215.1;ENST00000464972.1	TSS1500;TSS1500;TSS1500;TSS1500;TSS200;3'UTR;3'UTR	chr1:8482420-8485155	3
cg26623444	7.21188	4.21e-06	0.00529225	0.193469	HYPER	chr7	31376092	-			I	C	Grn	NA	NA	NA	NA	NA	NA	chr7:31375845-31376542	Island					DMR	TRUE	7:31342084-31343127									chr7:31375845-31376655	3						TRUE
cg00252934	-7.21079	4.22e-06	0.00529225	-0.266909	HYPO	chr3	36782736	+		DCLK3	II			NA	NA	NA	NA	NA	NA		OpenSea	NM_033403	TSS1500								DCLK3	ENST00000416516.2	TSS1500	DCLK3	ENST00000416516.2	TSS1500					chr3:36782467-36783281	6		TRUE
cg26739084	7.21001	4.22e-06	0.00529225	0.186345	HYPER	chr10	126036630	-			II			NA	NA	NA	NA	NA	NA		OpenSea																		chr10:126036339-126036998	6	chr10:126036624-126036995	4
cg02015004	7.20936	4.22e-06	0.00529225	0.160593	HYPER	chr12	53718427	+	AAAS		II			rs17751196	0.000833	NA	NA	NA	NA	chr12:53718632-53719778	N_Shore					CDMR		12:52004556-52006045	12:53717236-53718959	Promoter_Associated	AAAS;AAAS	ENST00000550286.1;ENST00000550286.1	5'UTR;1stExon	AAAS;AAAS;AAAS;AAAS;AAAS	ENST00000548258.1;ENST00000551724.1;ENST00000550286.1;ENST00000548258.1;ENST00000550286.1	3'UTR;3'UTR;5'UTR;1stExon;1stExon	chr12:53717920-53718475	3						TRUE
cg06881280	-7.20929	4.23e-06	0.00529225	-0.204016	HYPO	chr17	27876591	-	TAOK1	TAOK1;TAOK1	II			rs2559619	0.13456	NA	NA	NA	NA		OpenSea	NM_025142;NM_020791	3'UTR;3'UTR								RP11-296K13.1	ENST00000562535.1	5'UTR	RP11-296K13.1	ENST00000562535.1	5'UTR			chr17:27876085-27876664	6
cg14842110	-7.20101	4.28e-06	0.00531954	-0.277428	HYPO	chr6	83718575	-	UBE3D	UBE3D;UBE3D	II			NA	NA	NA	NA	NA	NA		OpenSea	NM_001304437;NM_198920	Body;Body											UBE3D;UBE3D;UBE3D	ENST00000237186.6;ENST00000509102.1;ENST00000430071.2	3'UTR;3'UTR;3'UTR	chr6:83718380-83718615	3
cg23580038	7.20069	4.28e-06	0.00531954	0.145285	HYPER	chr11	45201741	-	PRDM11	PRDM11	I	C	Grn	NA	NA	NA	NA	NA	NA	chr11:45201783-45202728	N_Shore	NM_020229	Body						11:45201654-45202723	Unclassified_Cell_type_specific	PRDM11;AC103681.1	ENST00000424263.2;ENST00000399269.2	5'UTR;5'UTR	PRDM11;PRDM11;AC103681.1	ENST00000526442.1;ENST00000424263.2;ENST00000399269.2	5'UTR;5'UTR;5'UTR	chr11:45201325-45202395	3						TRUE
cg02813863	7.20056	4.28e-06	0.00531954	0.137004	HYPER	chr12	12938287	+	APOLD1	APOLD1;APOLD1	II			NA	NA	NA	NA	NA	NA	chr12:12939713-12940391	N_Shore	NM_001130415;NM_030817	Body;TSS1500								APOLD1;RP11-59H1.3	ENST00000356591.4;ENST00000534843.1	TSS1500;3'UTR	APOLD1;RP11-59H1.3;RP11-59H1.3	ENST00000356591.4;ENST00000540583.1;ENST00000534843.1	TSS1500;3'UTR;3'UTR	chr12:12937800-12938675	3					TRUE	TRUE
cg09656389	7.19906	4.29e-06	0.00531954	0.148796	HYPER	chr11	31839790	+	RCN1	PAX6	I	A	Red	NA	NA	NA	NA	NA	NA	chr11:31839363-31839813	Island	NM_001127612	TSS1500					11:31794464-31796643	11:31839024-31839969	Unclassified_Cell_type_specific	PAX6;PAX6;RCN1	ENST00000464174.1;ENST00000419022.1;ENST00000506388.2	TSS1500;TSS1500;5'UTR	PAX6;PAX6;PAX6;PAX6;RCN1;RCN1	ENST00000464174.1;ENST00000423822.1;ENST00000532175.1;ENST00000419022.1;ENST00000530348.1;ENST00000506388.2	TSS1500;TSS1500;TSS1500;TSS1500;5'UTR;5'UTR	chr11:31838325-31840155	3						TRUE
cg15542713	7.19845	4.3e-06	0.00531954	0.261243	HYPER	chr1	42385581	-	HIVEP3	HIVEP3;HIVEP3	II			NA	NA	rs12083682	0.041133	rs12083682	0.041133	chr1:42383640-42384003	S_Shore	NM_024503;NM_001127714	TSS1500;TSS1500			RDMR			1:42385318-42386158	Promoter_Associated	HIVEP3;HIVEP3	ENST00000372583.1;ENST00000372584.1	TSS1500;TSS1500	HIVEP3;HIVEP3;HIVEP3;HIVEP3	ENST00000372583.1;ENST00000491442.1;ENST00000372584.1;ENST00000489103.1	TSS1500;TSS1500;TSS1500;3'UTR	chr1:42385485-42386015	3						TRUE
cg05336318	7.1968	4.31e-06	0.00531954	0.143781	HYPER	chr13	25743818	+	AMER2	AMER2;AMER2	II			NA	NA	NA	NA	NA	NA	chr13:25743998-25746127	N_Shore	NM_199138;NM_152704	Body;1stExon								FAM123A	ENST00000515384.1	1stExon	FAM123A	ENST00000515384.1	1stExon	chr13:25743665-25744175	3
cg00903371	7.19565	4.32e-06	0.00531954	0.330156	HYPER	chr2	238360134	-			II			NA	NA	NA	NA	NA	NA		OpenSea						TRUE	2:238024819-238024941	2:238360078-238360853	Unclassified_Cell_type_specific											chr2:238359894-238360944	6		TRUE
cg26575637	7.19497	4.32e-06	0.00531954	0.173861	HYPER	chr12	16760056	-	MGST1,LMO3	LMO3;LMO3	II			NA	NA	NA	NA	NA	NA		OpenSea	NM_001001395;NM_018640	5'UTR;TSS1500								LMO3;LMO3;LMO3;LMO3;LMO3;LMO3;LMO3;LMO3;LMO3;LMO3;LMO3;LMO3;LMO3	ENST00000540445.1;ENST00000541295.1;ENST00000535535.1;ENST00000540445.1;ENST00000537568.1;ENST00000542544.1;ENST00000354662.1;ENST00000441439.2;ENST00000534946.1;ENST00000540848.1;ENST00000541846.1;ENST00000537304.1;ENST00000447609.1	5'UTR;TSS1500;TSS1500;1stExon;3'UTR;5'UTR;5'UTR;5'UTR;5'UTR;5'UTR;5'UTR;TSS1500;TSS1500	LMO3;LMO3;LMO3;LMO3;LMO3;LMO3;LMO3;LMO3;LMO3;LMO3;LMO3;LMO3;LMO3;LMO3;LMO3;LMO3;LMO3;LMO3;LMO3;LMO3;LMO3;LMO3;LMO3;LMO3;LMO3;LMO3;LMO3;LMO3;LMO3;LMO3;LMO3;MGST1	ENST00000540445.1;ENST00000536172.1;ENST00000546281.1;ENST00000537757.1;ENST00000541295.1;ENST00000539232.1;ENST00000535535.1;ENST00000540445.1;ENST00000541764.1;ENST00000536172.1;ENST00000543721.1;ENST00000536509.1;ENST00000332914.6;ENST00000537568.1;ENST00000544276.1;ENST00000544754.1;ENST00000542544.1;ENST00000541589.1;ENST00000354662.1;ENST00000396205.2;ENST00000441439.2;ENST00000538051.1;ENS…	5'UTR;5'UTR;5'UTR;5'UTR;TSS1500;TSS1500;TSS1500;1stExon;TSS200;1stExon;TSS200;3'UTR;3'UTR;3'UTR;3'UTR;5'UTR;5'UTR;5'UTR;5'UTR;5'UTR;5'UTR;5'UTR;5'UTR;5'UTR;5'UTR;5'UTR;5'UTR;5'UTR;TSS1500;TSS1500;TSS1500;5'UTR	chr12:16759920-16760210	3						TRUE
cg01557792	-7.19338	4.33e-06	0.00531954	-0.0960608	HYPO	chr14	70162755	+	KIAA0247	KIAA0247	II			NA	NA	NA	NA	NA	NA		OpenSea	NM_014734	Body				TRUE							KIAA0247	ENST00000556993.1	5'UTR	chr14:70162400-70163155	3						TRUE
cg06408776	7.19284	4.34e-06	0.00531954	0.0463691	HYPER	chr22	37413588	+	TST	TST;TST	II			rs9622534	0.088047	NA	NA	NA	NA	chr22:37414319-37416111	N_Shore	NM_001270483;NM_003312	Body;Body														chr22:37413505-37413870	3
cg27552679	7.19229	4.34e-06	0.00531954	0.27184	HYPER	chr15	74425757	+	ISLR2	ISLR2;ISLR2;ISLR2;ISLR2	I	A	Red	NA	NA	NA	NA	NA	NA	chr15:74425091-74428821	Island	NM_001130138;NM_020851;NM_001130136;NM_001130137	Body;Body;Body;Body					15:72211659-72214800			ISLR2	ENST00000561975.1	5'UTR	ISLR2	ENST00000561975.1	5'UTR	chr15:74424845-74426175	3						TRUE
cg24054700	7.19217	4.34e-06	0.00531954	0.250502	HYPER	chr4	8107392	-	ABLIM2	ABLIM2;ABLIM2;ABLIM2;ABLIM2;ABLIM2;ABLIM2;ABLIM2	I	C	Grn	NA	NA	NA	NA	NA	NA		OpenSea	NM_032432;NM_001130083;NM_001130087;NM_001130088;NM_001130084;NM_001130085;NM_001130086	Body;Body;Body;Body;Body;Body;Body					4:8158018-8158325			ABLIM2	ENST00000318888.4	5'UTR	ABLIM2	ENST00000318888.4	5'UTR								TRUE
cg16664496	7.19209	4.34e-06	0.00531954	0.143788	HYPER	chr16	87740413	-	KLHDC4	LOC100129637	II			NA	NA	NA	NA	NA	NA	chr16:87741910-87742152	N_Shore	NR_024488	TSS1500				TRUE	16:86297843-86298064	16:87740406-87740575	Unclassified_Cell_type_specific	AC010536.1	ENST00000446344.1	TSS1500	KLHDC4;AC010536.1;KLHDC4	ENST00000568499.1;ENST00000446344.1;ENST00000567298.1	3'UTR;TSS1500;3'UTR	chr16:87740045-87740595	3						TRUE
cg01537248	7.19188	4.34e-06	0.00531954	0.214376	HYPER	chr17	46517641	-			II			NA	NA	NA	NA	NA	NA		OpenSea				chr17:46517436-46517436				17:46517331-46517755	Unclassified							chr17:46517365-46517835	3
cg13274938	-7.19078	4.35e-06	0.00532037	-0.261745	HYPO	chr17	38493822	+	RARA	RARA;RARA;RARA	II			NA	NA	NA	NA	NA	NA	chr17:38497527-38498963	N_Shelf	NM_001145301;NM_000964;NM_001145302	Body;Body;Body																					TRUE	TRUE
cg20303561	-7.18664	4.38e-06	0.00534671	-0.159725	HYPO	chr14	91881497	+	CCDC88C	CCDC88C	II			rs17127363	0.019776	NA	NA	NA	NA	chr14:91883361-91883566	N_Shore	NM_001080414	Body								CCDC88C	ENST00000554165.1	3'UTR	CCDC88C;CCDC88C;CCDC88C	ENST00000554872.1;ENST00000554165.1;ENST00000556767.1	3'UTR;3'UTR;3'UTR			chr14:91880827-91881532	5	chr14:91879238-91881820	6		TRUE
cg05522449	7.18545	4.39e-06	0.00534839	0.1083	HYPER	chr14	100220613	-	EML1		II			NA	NA	NA	NA	NA	NA		OpenSea				chr14:100220531-100220531												chr14:100220480-100221075	3
cg03869225	-7.18345	4.4e-06	0.00535685	-0.315527	HYPO	chr12	117477105	+	TESC	TESC;TESC;TESC	II			NA	NA	NA	NA	NA	NA	chr12:117476810-117477106	Island	NR_031766;NM_017899;NM_001168325	Body;Body;Body				TRUE	12:115961194-115961489						TESC	ENST00000470612.1	3'UTR	chr12:117476805-117477395	3						TRUE
cg21013380	-7.18012	4.42e-06	0.00537082	-0.185316	HYPO	chr8	34107338	+	RP1-84O15.2		II			NA	NA	NA	NA	NA	NA		OpenSea										RP11-431M3.2;RP1-84O15.2	ENST00000518178.1;ENST00000522460.1	TSS1500;5'UTR	RP11-431M3.2;RP1-84O15.2	ENST00000518178.1;ENST00000522460.1	TSS1500;5'UTR
cg09369269	7.17982	4.43e-06	0.00537082	0.252139	HYPER	chr10	11667257	-			II			NA	NA	NA	NA	NA	NA		OpenSea				chr10:11667101-11667101												chr10:11667065-11667275	3
cg01130922	7.1784	4.44e-06	0.00537448	0.114298	HYPER	chr7	552776	-	PDGFA	PDGFA;PDGFA	II			NA	NA	NA	NA	NA	NA	chr7:556611-562845	N_Shelf	NM_002607;NM_033023	Body;Body				TRUE	7:519179-519360						PDGFA;PDGFA	ENST00000482462.1;ENST00000482462.1	1stExon;3'UTR	chr7:552580-553035	3						TRUE
cg14815743	7.17636	4.45e-06	0.00538337	0.175615	HYPER	chr19	47354685	-		AP2S1;AP2S1	I	A	Red	NA	NA	NA	NA	NA	NA	chr19:47353614-47354150	S_Shore	NM_004069;NM_021575	TSS1500;TSS1500								AP2S1	ENST00000263270.5	TSS1500	AP2S1	ENST00000263270.5	TSS1500			chr19:47352419-47354761	6	chr19:47351853-47354824	6		TRUE
cg02929993	-7.17347	4.47e-06	0.00539957	-0.244781	HYPO	chr7	55195359	-	EGFR	EGFR;EGFR;EGFR;EGFR	II			rs10488141	0.113234	NA	NA	NA	NA		OpenSea	NM_201283;NM_201282;NM_201284;NM_005228	Body;Body;Body;Body								EGFR;EGFR	ENST00000395504.3;ENST00000454757.2	5'UTR;5'UTR	EGFR;EGFR;EGFR	ENST00000395504.3;ENST00000450046.1;ENST00000454757.2	5'UTR;5'UTR;5'UTR	chr7:55195265-55195775	3
cg21436756	7.17116	4.49e-06	0.00540518	0.0742179	HYPER	chr17	40190501	+	ZNF385C,CTD-2132N18.4	ZNF385C	II			rs1055104	0.050465	NA	NA	NA	NA	chr17:40191787-40192450	N_Shore	NM_001242704	TSS1500														chr17:40190325-40190995	3
cg18288558	7.17085	4.49e-06	0.00540518	0.152862	HYPER	chr1	4079286	-			II			NA	NA	NA	NA	NA	NA		OpenSea				chr1:4079242-4079242			1:3978695-3979310																TRUE
cg00325113	7.16752	4.51e-06	0.00542412	0.0769031	HYPER	chr20	44097716	-	AL031663.1	WFDC2	II			NA	NA	NA	NA	NA	NA	chr20:44098280-44099536	N_Shore	NM_006103	TSS1500			CDMR					WFDC2;WFDC2	ENST00000372676.3;ENST00000217425.5	TSS1500;TSS1500	WFDC2;WFDC2	ENST00000372676.3;ENST00000217425.5	TSS1500;TSS1500								TRUE
cg18838431	7.16667	4.52e-06	0.00542412	0.112378	HYPER	chr11	74178800	+	RP11-702H23.4	KCNE3	I	A	Red	NA	NA	NA	NA	NA	NA	chr11:74178175-74178801	Island	NM_005472	TSS1500				TRUE				KCNE3;RP11-702H23.4	ENST00000310128.4;ENST00000533008.1	TSS200;5'UTR	KCNE3;KCNE3;KCNE3;KCNE3;RP11-702H23.4	ENST00000310128.4;ENST00000532569.1;ENST00000531854.1;ENST00000529425.1;ENST00000533008.1	TSS200;TSS200;TSS1500;TSS1500;5'UTR	chr11:74177885-74179615	3						TRUE
cg24279353	-7.16322	4.54e-06	0.00543664	-0.252455	HYPO	chr4	12205650	-			II			NA	NA	NA	NA	NA	NA		OpenSea																chr4:12205640-12205910	3
cg10167301	7.16296	4.54e-06	0.00543664	0.237926	HYPER	chr9	134604665	-	RAPGEF1	RAPGEF1;RAPGEF1	II			NA	NA	NA	NA	NA	NA		OpenSea	NM_005312;NM_001304275	Body;Body		chr9:134604574-134604574				9:134604344-134605268	Promoter_Associated	RAPGEF1	ENST00000431470.1	5'UTR	RAPGEF1	ENST00000431470.1	5'UTR	chr9:134603940-134604755	3
cg12424921	7.16228	4.55e-06	0.00543664	0.20773	HYPER	chr11	63828039	-	MACROD1,RP11-21A7A.2	MACROD1	II			NA	NA	NA	NA	NA	NA		OpenSea	NM_014067	Body				TRUE	11:63584212-63584715	11:63827784-63829045	Unclassified_Cell_type_specific	RP11-21A7A.2	ENST00000537170.1	5'UTR	RP11-21A7A.2;MACROD1;MACROD1;MACROD1;RP11-21A7A.2;RP11-21A7A.2	ENST00000538550.1;ENST00000543422.1;ENST00000545464.1;ENST00000542359.1;ENST00000537170.1;ENST00000538550.1	1stExon;3'UTR;3'UTR;3'UTR;5'UTR;5'UTR	chr11:63827465-63828155	3						TRUE
cg11980897	7.15934	4.57e-06	0.00545358	0.118837	HYPER	chr1	32237457	+			II			NA	NA	NA	NA	NA	NA	chr1:32237827-32238661	N_Shore						TRUE		1:32236958-32238593	Promoter_Associated_Cell_type_specific									chr1:32232844-32238849	6				TRUE
cg09474699	7.15574	4.6e-06	0.00547114	0.117804	HYPER	chr22	37750979	-	RP1-63G5.5	LOC100506271;ELFN2	II			NA	NA	NA	NA	NA	NA		OpenSea	NR_110515;NR_110512	TSS200;Body								RP1-63G5.7;RP1-63G5.5	ENST00000445088.1;ENST00000430883.1	TSS200;3'UTR	RP1-63G5.7;RP1-63G5.5;RP1-63G5.5	ENST00000445088.1;ENST00000430883.1;ENST00000452946.1	TSS200;3'UTR;3'UTR
cg26684679	7.15536	4.6e-06	0.00547114	0.17863	HYPER	chr12	132913797	-			I	T	Red	NA	NA	NA	NA	NA	NA	chr12:132910476-132910802	S_Shelf							12:131423675-131424149											chr12:132912229-132919443	6				TRUE
cg14406216	7.15112	4.63e-06	0.00549599	0.202469	HYPER	chr22	44543708	-	PARVB	PARVB;PARVB;PARVB;PARVB	II			NA	NA	NA	NA	NA	NA		OpenSea	NM_001003828;NM_013327;NM_001243385;NM_001243386	Body;Body;Body;Body				TRUE										chr22:44543485-44544635	3
cg24265138	-7.15056	4.63e-06	0.00549599	-0.247533	HYPO	chr2	237413481	+	IQCA1	IQCA1;IQCA1;IQCA1;IQCA1	II			rs10179669	0.469188	NA	NA	NA	NA	chr2:237416090-237416382	N_Shelf	NM_001270585;NR_073043;NM_024726;NM_001270584	TSS1500;Body;Body;Body								IQCA1;IQCA1	ENST00000309507.5;ENST00000457693.1	5'UTR;TSS1500	IQCA1;IQCA1;IQCA1	ENST00000309507.5;ENST00000457693.1;ENST00000418802.1	5'UTR;TSS1500;TSS1500
cg14051236	7.14587	4.67e-06	0.00550548	0.0405543	HYPER	chr14	100029763	-	CCDC85C	CCDC85C	II			NA	NA	NA	NA	NA	NA		OpenSea	NM_001144995	Body		chr14:100029558-100029558		TRUE		14:100029327-100029876	Unclassified_Cell_type_specific				CCDC85C	ENST00000554877.1	5'UTR	chr14:100029525-100029815	3						TRUE
cg13704680	-7.14515	4.67e-06	0.00550548	-0.262665	HYPO	chr18	77905298	-	ADNP2	LOC100130522;LOC100130522	II			NA	NA	NA	NA	NA	NA	chr18:77905297-77905566	Island	NR_028339;NR_028340	TSS1500;TSS1500											ADNP2	ENST00000561195.1	5'UTR	chr18:77905080-77905615	3						TRUE
cg00218939	7.14487	4.68e-06	0.00550548	0.156966	HYPER	chr18	54728381	+	LINC-ROR	LINC-ROR	II			rs28502441	0.010522	NA	NA	NA	NA		OpenSea	NR_048536	Body								CTD-2526M8.1	ENST00000553704.1	3'UTR	CTD-2526M8.1	ENST00000553704.1	3'UTR	chr18:54728240-54728430	3
cg04926732	7.14478	4.68e-06	0.00550548	0.0798382	HYPER	chr4	619314	+		PDE6B;PDE6B	II			NA	NA	NA	NA	NA	NA	chr4:619513-619912	N_Shore	NM_001145291;NM_000283	TSS200;TSS200								PDE6B;PDE6B	ENST00000255622.6;ENST00000496514.1	TSS200;TSS200	PDE6B;PDE6B	ENST00000255622.6;ENST00000496514.1	TSS200;TSS200	chr4:618845-619435	3						TRUE
cg19967511	7.14467	4.68e-06	0.00550548	0.280212	HYPER	chr13	100037139	-	UBAC2	UBAC2;UBAC2;UBAC2	II			NA	NA	NA	NA	NA	NA		OpenSea	NM_001144072;NM_177967;NR_026644	Body;Body;Body					13:98835071-98835162			UBAC2	ENST00000460562.1	5'UTR	UBAC2;UBAC2;UBAC2;UBAC2	ENST00000494576.1;ENST00000473194.1;ENST00000460562.1;ENST00000480738.1	5'UTR;5'UTR;5'UTR;5'UTR	chr13:100037105-100037315	3						TRUE
cg01103207	7.14178	4.7e-06	0.00552039	0.0838981	HYPER	chr7	47535640	+	TNS3	TNS3	II			NA	NA	NA	NA	NA	NA		OpenSea	NM_022748	5'UTR				TRUE				TNS3;TNS3;TNS3	ENST00000545849.1;ENST00000398879.1;ENST00000311160.9	5'UTR;5'UTR;5'UTR	TNS3;TNS3;TNS3	ENST00000545849.1;ENST00000398879.1;ENST00000311160.9	5'UTR;5'UTR;5'UTR								TRUE
cg17548994	-7.14096	4.7e-06	0.00552039	-0.162502	HYPO	chr21	19413535	+	CHODL,AP000998.2	CHODL;CHODL;CHODL;CHODL	II			NA	NA	NA	NA	NA	NA		OpenSea	NM_001204175;NM_001204177;NM_001204178;NM_001204176	5'UTR;5'UTR;5'UTR;5'UTR								CHODL;CHODL;AP000998.2	ENST00000400128.1;ENST00000400131.1;ENST00000432412.1	5'UTR;5'UTR;3'UTR	CHODL;CHODL;CHODL;CHODL;AP000998.2	ENST00000427223.1;ENST00000452759.1;ENST00000400128.1;ENST00000400131.1;ENST00000432412.1	ExonBnd;5'UTR;5'UTR;5'UTR;3'UTR	chr21:19413460-19413650	3
cg13910020	7.1401	4.71e-06	0.00552039	0.195904	HYPER	chr1	235184122	+			II			NA	NA	NA	NA	NA	NA		OpenSea				chr1:235183936-235183936												chr1:235183140-235184210	3
cg05405978	7.13741	4.73e-06	0.00553553	0.224756	HYPER	chr19	57485870	+			II			NA	NA	NA	NA	NA	NA		OpenSea																				chr19:57484946-57490165	6
cg18063878	7.13595	4.74e-06	0.00553574	0.0713136	HYPER	chr11	47431064	-	SLC39A13	SLC39A13;SLC39A13	II			NA	NA	NA	NA	NA	NA	chr11:47429733-47430346	S_Shore	NM_001128225;NM_152264	5'UTR;5'UTR								SLC39A13;SLC39A13;SLC39A13;SLC39A13;SLC39A13;SLC39A13;SLC39A13;RP11-750H9.5;RP11-750H9.5	ENST00000533076.1;ENST00000531974.1;ENST00000524928.1;ENST00000531419.1;ENST00000531865.1;ENST00000362021.4;ENST00000354884.4;ENST00000532943.1;ENST00000532340.1	5'UTR;5'UTR;TSS1500;5'UTR;5'UTR;5'UTR;5'UTR;TSS1500;TSS1500	SLC39A13;SLC39A13;SLC39A13;SLC39A13;SLC39A13;SLC39A13;SLC39A13;SLC39A13;SLC39A13;RP11-750H9.5;RP11-750H9.5	ENST00000533076.1;ENST00000527091.1;ENST00000531974.1;ENST00000524928.1;ENST00000531419.1;ENST00000531865.1;ENST00000362021.4;ENST00000354884.4;ENST00000526614.1;ENST00000532943.1;ENST00000532340.1	5'UTR;TSS1500;5'UTR;TSS1500;5'UTR;5'UTR;5'UTR;5'UTR;TSS200;TSS1500;TSS1500	chr11:47431025-47431655	3
cg17070937	-7.13549	4.75e-06	0.00553574	-0.181508	HYPO	chr2	202753796	+	CDK15	CDK15;CDK15;CDK15	II			NA	NA	NA	NA	NA	NA		OpenSea	NM_001261436;NM_001261435;NM_139158	3'UTR;Body;Body				TRUE				CDK15	ENST00000434439.1	3'UTR	CDK15;CDK15;CDK15	ENST00000434439.1;ENST00000460149.1;ENST00000466337.1	3'UTR;5'UTR;5'UTR			chr2:202753784-202754046	3	chr2:202752189-202753805	3
cg02920396	7.13354	4.76e-06	0.00554451	0.135466	HYPER	chr11	68782211	+	RP11-554A11.6	MRGPRF;MRGPRF	II			rs2846196	0.204708	NA	NA	NA	NA	chr11:68778569-68778851	S_Shelf	NM_001098515;NM_145015	TSS1500;TSS1500				TRUE		11:68780346-68782287	Unclassified	MRGPRF;MRGPRF;MRGPRF;RP11-554A11.6	ENST00000421543.2;ENST00000441623.1;ENST00000309099.6;ENST00000538407.2	TSS1500;TSS1500;TSS1500;5'UTR	MRGPRF;MRGPRF;MRGPRF;RP11-554A11.6	ENST00000421543.2;ENST00000441623.1;ENST00000309099.6;ENST00000538407.2	TSS1500;TSS1500;TSS1500;5'UTR	chr11:68781685-68782435	3						TRUE
cg22158603	-7.12647	4.81e-06	0.00558481	-0.262042	HYPO	chr16	387629	+	AXIN1	AXIN1;AXIN1	II			NA	NA	NA	NA	NA	NA		OpenSea	NM_003502;NM_181050	Body;Body								AXIN1	ENST00000481769.1	3'UTR	AXIN1;AXIN1	ENST00000461023.1;ENST00000481769.1	3'UTR;3'UTR	chr16:387345-387915	3
cg02293358	7.1259	4.82e-06	0.00558481	0.112894	HYPER	chr14	92355142	-	FBLN5	FBLN5	II			rs2430353	0.156008	NA	NA	NA	NA		OpenSea	NM_006329	Body														chr14:92355020-92355595	3
cg04586023	7.12556	4.82e-06	0.00558481	0.0751379	HYPER	chr22	50690380	+	MAPK12	HDAC10;HDAC10	II			NA	NA	NA	NA	NA	NA	chr22:50689160-50690167	S_Shore	NM_001159286;NM_032019	TSS1500;TSS1500								HDAC10;HDAC10;HDAC10;HDAC10;MAPK12	ENST00000349505.4;ENST00000448072.1;ENST00000498366.1;ENST00000216271.5;ENST00000497036.1	TSS1500;TSS1500;TSS1500;TSS1500;3'UTR	HDAC10;HDAC10;HDAC10;HDAC10;HDAC10;HDAC10;HDAC10;HDAC10;HDAC10;HDAC10;HDAC10;MAPK12	ENST00000496909.1;ENST00000482213.1;ENST00000454936.1;ENST00000429374.1;ENST00000489424.1;ENST00000448072.1;ENST00000483222.1;ENST00000415993.1;ENST00000498366.1;ENST00000216271.5;ENST00000497483.1;ENST00000497036.1	TSS1500;TSS1500;TSS1500;TSS1500;TSS1500;TSS1500;TSS1500;TSS1500;TSS1500;TSS1500;TSS1500;3'UTR	chr22:50690005-50690635	3					TRUE	TRUE
cg25910974	7.12519	4.82e-06	0.00558481	0.404363	HYPER	chr16	86463053	-			II			NA	NA	NA	NA	NA	NA		OpenSea																chr16:86462400-86463195	3
cg15571623	7.12388	4.83e-06	0.0055881	0.12853	HYPER	chr7	2127984	-	MAD1L1	MAD1L1;MAD1L1;MAD1L1	I	T	Red	rs73032345	0.021701	NA	NA	NA	NA		OpenSea	NM_003550;NM_001013837;NM_001013836	Body;Body;Body					7:2094283-2094878						MAD1L1;MAD1L1;MAD1L1;MAD1L1;MAD1L1	ENST00000483165.1;ENST00000491858.1;ENST00000464742.1;ENST00000421113.1;ENST00000444373.2	3'UTR;3'UTR;3'UTR;5'UTR;5'UTR			chr7:2127206-2128948	6				TRUE
cg21480333	7.12114	4.85e-06	0.00560405	0.134893	HYPER	chr1	201598056	+	NAV1		II			rs117398926	0.014323	NA	NA	NA	NA		OpenSea										NAV1	ENST00000367302.1	5'UTR	NAV1;NAV1	ENST00000491403.1;ENST00000367302.1	5'UTR;5'UTR			chr1:201597649-201598763	4
cg22590522	7.11946	4.87e-06	0.0056107	0.0762128	HYPER	chr17	73629390	-	RECQL5	RECQL5;LOC643008	II			NA	NA	NA	NA	NA	NA	chr17:73627542-73627824	S_Shore	NM_004259;NM_001162995	Body;TSS200				TRUE				C17orf109	ENST00000375215.3	TSS200	C17orf109	ENST00000375215.3	TSS200	chr17:73629060-73629895	3						TRUE
cg21391551	7.11703	4.89e-06	0.00561884	0.0974643	HYPER	chr16	66960351	-		RRAD;RRAD	II			NA	NA	NA	NA	NA	NA	chr16:66958733-66959655	S_Shore	NM_004165;NM_001128850	TSS1500;TSS1500						16:66960081-66960828	Unclassified	RRAD;RRAD;RRAD	ENST00000566577.1;ENST00000420652.1;ENST00000299759.6	TSS1500;TSS1500;TSS1500	RRAD;RRAD;RRAD;RRAD	ENST00000566577.1;ENST00000568915.1;ENST00000420652.1;ENST00000299759.6	TSS1500;TSS1500;TSS1500;TSS1500	chr16:66958645-66960835	3
cg00862588	7.11525	4.9e-06	0.00561884	0.183692	HYPER	chr6	32909397	-	XXbac-BPG181M17.5	HLA-DMB	II			NA	NA	NA	NA	NA	NA		OpenSea	NM_002118	TSS1500						6:32908496-32909716	Unclassified	HLA-DMB;HLA-DMB;HLA-DMB	ENST00000416244.2;ENST00000446948.2;ENST00000418107.2	TSS1500;TSS1500;TSS1500	HLA-DMB;HLA-DMB;HLA-DMB;HLA-DMB	ENST00000498020.1;ENST00000416244.2;ENST00000446948.2;ENST00000418107.2	TSS1500;TSS1500;TSS1500;TSS1500	chr6:32909260-32909575	3						TRUE
cg07695305	7.11509	4.9e-06	0.00561884	0.196865	HYPER	chr15	58815660	+	LIPC	LIPC	II			NA	NA	NA	NA	NA	NA		OpenSea	NM_000236	Body											LIPC	ENST00000559845.1	5'UTR	chr15:58815325-58815775	3
cg06446886	-7.1142	4.91e-06	0.00561884	-0.277313	HYPO	chr19	14380224	+	CTD-2189E23.1		II			NA	NA	NA	NA	NA	NA	chr19:14376688-14376961	S_Shelf																		chr19:14379487-14380380	6	chr19:14379771-14380365	6
cg11273702	-7.1138	4.91e-06	0.00561884	-0.526788	HYPO	chr3	66935847	-			II			NA	NA	NA	NA	NA	NA		OpenSea						TRUE														chr3:66935778-66936236	4		TRUE
cg15414132	7.11297	4.92e-06	0.00561884	0.133354	HYPER	chr11	65150358	-	SLC25A45	SLC25A45;SLC25A45	II			rs78184691	0.026933	NA	NA	NA	NA	chr11:65153726-65154606	N_Shelf	NM_001077241;NM_182556	TSS1500;TSS1500				TRUE		11:65149260-65150575	Promoter_Associated	SLC25A45;SLC25A45;SLC25A45;SLC25A45;SLC25A45;SLC25A45	ENST00000417511.2;ENST00000526432.1;ENST00000527174.1;ENST00000534028.1;ENST00000294187.6;ENST00000360662.3	5'UTR;TSS1500;TSS1500;TSS1500;TSS1500;TSS1500	SLC25A45;SLC25A45;SLC25A45;SLC25A45;SLC25A45;SLC25A45;SLC25A45;SLC25A45;SLC25A45;SLC25A45;SLC25A45;SLC25A45;SLC25A45;SLC25A45	ENST00000417511.2;ENST00000526898.1;ENST00000526432.1;ENST00000526259.1;ENST00000527174.1;ENST00000534028.1;ENST00000533629.1;ENST00000294187.6;ENST00000529431.1;ENST00000529962.1;ENST00000531791.1;ENST00000377152.2;ENST00000524438.1;ENST00000530936.1	5'UTR;5'UTR;TSS1500;TSS1500;TSS1500;TSS1500;TSS1500;TSS1500;TSS1500;TSS1500;TSS1500;TSS1500;TSS1500;TSS1500	chr11:65149760-65150455	3						TRUE
cg03631415	-7.11074	4.93e-06	0.00562771	-0.421816	HYPO	chr12	53994907	+	RP11-793H13.10,ATF7	ATF7;ATF7;ATF7;ATF7;ATF7	II			NA	NA	NA	NA	NA	NA		OpenSea	NR_073163;NM_001206683;NM_001130060;NM_001206682;NM_006856	Body;5'UTR;5'UTR;5'UTR;5'UTR								ATF7;ATF7;ATF7	ENST00000328463.7;ENST00000548446.1;ENST00000420353.1	TSS200;TSS200;5'UTR	ATF7;ATF7;ATF7	ENST00000328463.7;ENST00000548446.1;ENST00000306727.9	TSS200;TSS200;5'UTR
cg08548172	7.11013	4.94e-06	0.00562771	0.0591799	HYPER	chr10	13629984	-	PRPF18	PRPF18	I	A	Red	NA	NA	NA	NA	NA	NA	chr10:13628789-13629266	S_Shore	NM_003675	Body					10:13669886-13669991			RP11-295P9.3	ENST00000430832.1	5'UTR	PRPF18;PRPF18;RP11-295P9.3	ENST00000417658.1;ENST00000320054.4;ENST00000430832.1	5'UTR;5'UTR;5'UTR					chr10:13628393-13630124	6		TRUE
cg11908904	-7.10719	4.96e-06	0.00563008	-0.332512	HYPO	chr17	41898576	-	MPP3	MPP3;MPP3	II			NA	NA	NA	NA	NA	NA		OpenSea	NR_003562;NM_001932	Body;Body								MPP3	ENST00000496503.1	3'UTR	MPP3;MPP3	ENST00000479797.1;ENST00000496503.1	TSS1500;3'UTR			chr17:41898095-41898667	5
cg13873287	7.10716	4.96e-06	0.00563008	0.302704	HYPER	chr14	91791794	-	CCDC88C	CCDC88C	II			rs10147454	0.405424	NA	NA	NA	NA		OpenSea	NM_001080414	Body		chr14:91791698-91791698																chr14:91789478-91792664	6
cg10127490	-7.10612	4.97e-06	0.00563008	-0.0870867	HYPO	chr3	15563072	+	COLQ	COLQ;COLQ	II			NA	NA	NA	NA	NA	NA		OpenSea	NM_005677;NM_080539	1stExon;1stExon				TRUE				COLQ;COLQ	ENST00000383786.3;ENST00000383787.2	1stExon;1stExon	COLQ;COLQ	ENST00000383786.3;ENST00000383785.2	1stExon;1stExon								TRUE
cg20245444	-7.10467	4.98e-06	0.00563008	-0.208693	HYPO	chr17	74434084	-	UBE2O	UBE2O	II			NA	NA	NA	NA	NA	NA		OpenSea	NM_022066	Body														chr17:74433985-74434410	3
cg05238606	-7.10421	4.99e-06	0.00563008	-0.127913	HYPO	chr16	68907950	-	TANGO6	TMCO7	II			NA	NA	NA	NA	NA	NA		OpenSea	NM_024562	Body			DMR								TMCO7	ENST00000565852.1	TSS1500	chr16:68907680-68908310	3						TRUE
cg07759833	7.10386	4.99e-06	0.00563008	0.126159	HYPER	chr13	44619208	-			II			NA	NA	NA	NA	NA	NA		OpenSea						TRUE										chr13:44619040-44619270	3						TRUE
cg14995797	7.10328	4.99e-06	0.00563008	0.0981303	HYPER	chr8	57232871	+	SDR16C5	SDR16C5;SDR16C5	II			rs72656063	0.058993	NA	NA	NA	NA	chr8:57232370-57232795	S_Shore	NM_138969;NM_138969	1stExon;5'UTR					8:57394645-57395824			SDR16C5;SDR16C5;SDR16C5;SDR16C5;SDR16C5	ENST00000303749.3;ENST00000538514.1;ENST00000396721.2;ENST00000303749.3;ENST00000538514.1	1stExon;1stExon;TSS200;5'UTR;5'UTR	SDR16C5;SDR16C5;SDR16C5;SDR16C5;SDR16C5	ENST00000303749.3;ENST00000522671.1;ENST00000396721.2;ENST00000303749.3;ENST00000522671.1	1stExon;1stExon;TSS200;5'UTR;5'UTR			chr8:57231997-57233465	6	chr8:57227759-57233775	6
cg21514900	7.10253	5e-06	0.00563008	0.294425	HYPER	chr2	206062925	-	PARD3B	PARD3B;PARD3B;PARD3B;PARD3B	II			rs72936153	0.092014	NA	NA	NA	NA		OpenSea	NM_001302769;NM_205863;NM_152526;NM_057177	Body;Body;Body;Body				TRUE				PARD3B	ENST00000462231.1	5'UTR	PARD3B	ENST00000462231.1	5'UTR	chr2:206062900-206063210	3
cg06535003	-7.10017	5.02e-06	0.00564019	-0.415173	HYPO	chr6	106042314	-			II			rs79733248	0.028076	NA	NA	NA	NA		OpenSea						TRUE														chr6:106038802-106043049	6		TRUE
cg13668490	7.09958	5.02e-06	0.00564019	0.0587902	HYPER	chr17	42463640	-	ITGA2B	ITGA2B	II			NA	NA	NA	NA	NA	NA	chr17:42462135-42463579	S_Shore	NM_000419	Body						17:42462188-42463660	Unclassified	ITGA2B	ENST00000377068.3	TSS1500	ITGA2B	ENST00000377068.3	TSS1500			chr17:42461426-42463944	6	chr17:42461951-42463852	6		TRUE
cg27315333	7.09757	5.04e-06	0.00565004	0.207579	HYPER	chr2	63285950	-			II			NA	NA	NA	NA	NA	NA	chr2:63285949-63287097	Island						TRUE	2:63139454-63140720									chr2:63284840-63287870	3						TRUE
cg08023849	7.09509	5.06e-06	0.00566168	0.0945774	HYPER	chr3	15374761	+	SH3BP5	SH3BP5;SH3BP5	II			NA	NA	NA	NA	NA	NA	chr3:15373314-15374209	S_Shore	NM_004844;NM_001018009	TSS1500;5'UTR								SH3BP5;SH3BP5;SH3BP5;SH3BP5;SH3BP5	ENST00000253688.5;ENST00000383791.3;ENST00000426925.1;ENST00000408919.3;ENST00000465894.2	TSS1500;TSS1500;TSS200;5'UTR;3'UTR	SH3BP5;SH3BP5;SH3BP5;SH3BP5;SH3BP5;SH3BP5;SH3BP5;SH3BP5	ENST00000459627.1;ENST00000450625.1;ENST00000412806.1;ENST00000253688.5;ENST00000383791.3;ENST00000426925.1;ENST00000408919.3;ENST00000465894.2	TSS1500;TSS1500;TSS1500;TSS1500;TSS1500;TSS200;5'UTR;3'UTR					chr3:15370795-15375728	6
cg22079102	7.09445	5.06e-06	0.00566168	0.220274	HYPER	chr19	5061085	-	KDM4B	KDM4B	I	A	Red	rs2249152	0.465823	NA	NA	NA	NA	chr19:5060984-5061242	Island	NM_015015	Body					19:5011985-5012148											chr19:5060381-5061701	6				TRUE
cg13488034	-7.09356	5.07e-06	0.00566168	-0.258386	HYPO	chr9	136763044	+	VAV2	VAV2;VAV2	II			NA	NA	NA	NA	NA	NA		OpenSea	NM_003371;NM_001134398	Body;Body								VAV2	ENST00000486113.1	3'UTR	VAV2	ENST00000486113.1	3'UTR	chr9:136762220-136763195	3
cg17616192	7.08842	5.11e-06	0.00569633	0.0682574	HYPER	chr17	80009015	-	RFNG,GPS1	GPS1;RFNG;GPS1	II			NA	NA	NA	NA	NA	NA	chr17:80008514-80010567	Island	NM_004127;NM_002917;NM_212492	TSS1500;Body;TSS1500					17:77601804-77604069	17:80008836-80010379	Promoter_Associated	GPS1;GPS1;GPS1	ENST00000392358.1;ENST00000355130.2;ENST00000392357.1	TSS1500;TSS1500;TSS1500	GPS1;GPS1;GPS1	ENST00000392358.1;ENST00000355130.2;ENST00000392357.1	TSS1500;TSS1500;TSS1500	chr17:80008625-80009495	3						TRUE
cg07637918	-7.0879	5.12e-06	0.00569633	-0.300777	HYPO	chr14	66478474	-			II			NA	NA	NA	NA	NA	NA		OpenSea										AL391261.1	ENST00000458915.1	TSS200	AL391261.1	ENST00000458915.1	TSS200	chr14:66478305-66478615	3
cg01319924	7.08592	5.13e-06	0.00570616	0.159523	HYPER	chr7	47608453	-	TNS3	TNS3	II			NA	NA	NA	NA	NA	NA		OpenSea	NM_022748	5'UTR								TNS3	ENST00000311160.9	5'UTR	TNS3;TNS3	ENST00000434451.1;ENST00000311160.9	5'UTR;5'UTR	chr7:47608180-47608510	3
cg07026968	-7.08402	5.15e-06	0.0057152	-0.35585	HYPO	chr7	77393601	+	RSBN1L	RSBN1L	II			NA	NA	NA	NA	NA	NA		OpenSea	NM_198467	Body											RSBN1L;RSBN1L	ENST00000445512.1;ENST00000468035.1	5'UTR;TSS1500
cg07120544	-7.07914	5.19e-06	0.0057334	-0.12731	HYPO	chr8	93076082	-	RUNX1T1	RUNX1T1;RUNX1T1;RUNX1T1	II			NA	NA	NA	NA	NA	NA		OpenSea	NM_175634;NM_175635;NM_004349	Body;5'UTR;TSS1500								RUNX1T1;RUNX1T1;RUNX1T1;RUNX1T1;RUNX1T1	ENST00000396218.1;ENST00000518844.1;ENST00000360348.2;ENST00000520724.1;ENST00000522163.1	TSS1500;5'UTR;5'UTR;5'UTR;3'UTR	RUNX1T1;RUNX1T1;RUNX1T1;RUNX1T1;RUNX1T1;RUNX1T1;RUNX1T1;RUNX1T1;RUNX1T1;RUNX1T1;RUNX1T1;RUNX1T1;RUNX1T1;RUNX1T1;RUNX1T1;RUNX1T1;RUNX1T1;RUNX1T1;RUNX1T1	ENST00000396218.1;ENST00000521733.1;ENST00000518317.1;ENST00000518823.1;ENST00000519061.1;ENST00000518844.1;ENST00000522316.1;ENST00000523290.1;ENST00000520172.1;ENST00000522065.1;ENST00000518256.1;ENST00000517792.1;ENST00000360348.2;ENST00000520556.1;ENST00000521319.1;ENST00000520724.1;ENST00000518832.1;ENST00000522163.1;ENST00000522860.1	TSS1500;TSS1500;5'UTR;5'UTR;5'UTR;5'UTR;3'UTR;3'UTR;3'UTR;3'UTR;3'UTR;5'UTR;5'UTR;5'UTR;5'UTR;5'UTR;5'UTR;3'UTR;3'UTR								TRUE
cg00953201	7.07886	5.19e-06	0.0057334	0.301	HYPER	chr13	30156486	+	SLC7A1	SLC7A1	II			NA	NA	NA	NA	NA	NA		OpenSea	NM_003045	5'UTR				TRUE				SLC7A1	ENST00000380752.4	5'UTR	SLC7A1;SLC7A1	ENST00000450494.1;ENST00000380752.4	5'UTR;5'UTR	chr13:30156305-30156675	3						TRUE
cg11375616	-7.07851	5.19e-06	0.0057334	-0.192794	HYPO	chr21	47287017	-	PCBP3	PCBP3;PCBP3	II			NA	NA	NA	NA	NA	NA	chr21:47287012-47287426	Island	NM_020528;NM_001130141	Body;Body					21:46111441-46112704						PCBP3	ENST00000498121.1	5'UTR			chr21:47286159-47287067	6				TRUE
cg26678920	7.07844	5.19e-06	0.0057334	0.106455	HYPER	chr11	6341888	-		PRKCDBP	I	C	Grn	NA	NA	NA	NA	NA	NA	chr11:6340445-6341909	Island	NM_145040	TSS200					11:6297022-6298816			PRKCDBP;PRKCDBP	ENST00000530979.1;ENST00000303927.3	TSS200;TSS200	PRKCDBP;PRKCDBP;PRKCDBP;PRKCDBP	ENST00000532354.1;ENST00000524852.1;ENST00000530979.1;ENST00000303927.3	TSS1500;TSS1500;TSS200;TSS200	chr11:6340985-6342475	3						TRUE
cg12850707	7.0775	5.2e-06	0.00573391	0.0971311	HYPER	chr20	56286773	+		NKILA;PMEPA1;PMEPA1;PMEPA1	II			rs957313	0.120144	NA	NA	NA	NA	chr20:56283891-56285395	S_Shore	NR_131157;NM_199170;NM_199169;NM_199171	Body;TSS1500;TSS1500;TSS200								PMEPA1;PMEPA1;PMEPA1;PMEPA1	ENST00000395816.3;ENST00000347215.4;ENST00000472841.1;ENST00000265626.4	TSS1500;TSS1500;TSS200;TSS1500	PMEPA1;PMEPA1;PMEPA1;PMEPA1	ENST00000395816.3;ENST00000347215.4;ENST00000472841.1;ENST00000265626.4	TSS1500;TSS1500;TSS200;TSS1500	chr20:56285860-56286855	3
cg09904907	7.07562	5.22e-06	0.0057429	0.220941	HYPER	chr11	66024375	-		KLC2;KLC2;KLC2;KLC2	II			rs113784489	0.022395	NA	NA	NA	NA	chr11:66024910-66026253	N_Shore	NM_001134776;NM_001134774;NM_022822;NM_001134775	TSS1500;TSS1500;TSS1500;TSS1500								KLC2;KLC2;KLC2	ENST00000417856.1;ENST00000394067.2;ENST00000394078.1	TSS1500;TSS1500;TSS1500	KLC2;KLC2;KLC2;KLC2;KLC2;KLC2	ENST00000531240.1;ENST00000526758.1;ENST00000394067.2;ENST00000394078.1;ENST00000461611.1;ENST00000475757.2	TSS1500;TSS1500;TSS1500;TSS1500;TSS1500;TSS1500	chr11:66024245-66024835	3						TRUE
cg06686914	7.07464	5.23e-06	0.00574371	0.204276	HYPER	chr11	130767378	-	SNX19	SNX19;SNX19	II			NA	NA	NA	NA	NA	NA		OpenSea	NM_001301089;NM_014758	Body;Body				TRUE		11:130766827-130767448	Gene_Associated_Cell_type_specific	SNX19	ENST00000533318.1	3'UTR	SNX19;SNX19	ENST00000526579.1;ENST00000533318.1	3'UTR;3'UTR	chr11:130767200-130767495	3
cg09647340	7.0734	5.24e-06	0.00574695	0.145456	HYPER	chr2	46054097	-	PRKCE	PRKCE	II			NA	NA	NA	NA	NA	NA		OpenSea	NM_005400	Body								PRKCE	ENST00000467135.1	5'UTR	PRKCE;PRKCE;PRKCE;PRKCE	ENST00000467135.1;ENST00000497602.1;ENST00000480453.1;ENST00000476675.1	5'UTR;5'UTR;5'UTR;5'UTR	chr2:46054085-46054450	3
cg01416891	-7.07195	5.25e-06	0.00575216	-0.162424	HYPO	chr10	94820892	-		CYP26C1	II			rs1538648	0.20875	NA	NA	NA	NA	chr10:94820026-94823252	Island	NM_183374	TSS200					10:94809776-94811385	10:94820882-94821041	Unclassified_Cell_type_specific	RP11-348J12.2;CYP26C1	ENST00000444965.1;ENST00000285949.5	TSS1500;TSS200	RP11-348J12.2;CYP26C1	ENST00000444965.1;ENST00000285949.5	TSS1500;TSS200			chr10:94818930-94829534	6	chr10:94819567-94824643	6		TRUE
cg18136439	-7.07006	5.26e-06	0.00575862	-0.258025	HYPO	chr7	80069491	+	CD36		II			NA	NA	NA	NA	NA	NA		OpenSea						TRUE				CD36	ENST00000435819.1	5'UTR	CD36	ENST00000435819.1	5'UTR	chr7:80069285-80069495	3
cg25666233	7.06926	5.27e-06	0.00575862	0.413098	HYPER	chr15	74424975	-	ISLR2	ISLR2;ISLR2;ISLR2;ISLR2	II			rs79443182	0.011729	NA	NA	NA	NA	chr15:74425091-74428821	N_Shore	NM_001130136;NM_001130138;NM_020851;NM_001130137	5'UTR;5'UTR;5'UTR;5'UTR			CDMR		15:72211659-72214800			ISLR2;ISLR2;ISLR2;ISLR2;ISLR2;ISLR2;ISLR2;ISLR2	ENST00000445793.1;ENST00000361742.3;ENST00000565159.1;ENST00000435464.1;ENST00000453268.2;ENST00000395121.1;ENST00000565540.1;ENST00000561975.1	5'UTR;5'UTR;5'UTR;5'UTR;5'UTR;5'UTR;5'UTR;5'UTR	ISLR2;ISLR2;ISLR2;ISLR2;ISLR2;ISLR2;ISLR2;ISLR2;ISLR2;ISLR2;ISLR2;ISLR2	ENST00000569886.1;ENST00000445793.1;ENST00000361742.3;ENST00000565159.1;ENST00000567206.1;ENST00000561740.1;ENST00000435464.1;ENST00000453268.2;ENST00000565332.1;ENST00000395121.1;ENST00000565540.1;ENST00000561975.1	5'UTR;5'UTR;5'UTR;5'UTR;5'UTR;5'UTR;5'UTR;5'UTR;5'UTR;5'UTR;5'UTR;5'UTR	chr15:74424845-74426175	3						TRUE
cg19361543	7.06788	5.28e-06	0.00575862	0.0418621	HYPER	chr15	83877250	+	RP11-382A20.4	HDGFRP3	II			NA	NA	NA	NA	NA	NA	chr15:83875648-83877079	S_Shore	NM_016073	TSS1500								RP11-382A20.3;RP11-382A20.4	ENST00000299633.4;ENST00000565495.1	TSS1500;5'UTR	RP11-382A20.3;RP11-382A20.3;RP11-382A20.3;RP11-382A20.3;RP11-382A20.4	ENST00000568129.1;ENST00000563404.1;ENST00000563790.1;ENST00000299633.4;ENST00000565495.1	TSS1500;TSS1500;TSS1500;TSS1500;5'UTR	chr15:83875180-83877410	3
cg02611001	7.06771	5.28e-06	0.00575862	0.25926	HYPER	chr1	2458506	-		PANK4	II			NA	NA	NA	NA	NA	NA	chr1:2457241-2458259	S_Shore	NM_018216	TSS1500						1:2456298-2458748	Promoter_Associated	PANK4;PANK4;PANK4	ENST00000491212.1;ENST00000435556.3;ENST00000378466.3	TSS1500;TSS1500;TSS1500	PANK4;PANK4;PANK4;PANK4;PANK4	ENST00000491212.1;ENST00000486396.1;ENST00000435556.3;ENST00000514922.1;ENST00000378466.3	TSS1500;TSS1500;TSS1500;TSS1500;TSS1500	chr1:2458225-2458595	3
cg22272218	7.06681	5.29e-06	0.00575882	0.16529	HYPER	chr17	80671320	-			II			rs12952318	0.091949	NA	NA	NA	NA	chr17:80671111-80671340	Island							17:78264401-78264613											chr17:80670414-80671674	6	chr17:80671228-80671592	3		TRUE
cg08629836	7.06527	5.3e-06	0.00576492	0.2533	HYPER	chr4	3617256	+			I	C	Grn	NA	NA	NA	NA	NA	NA		OpenSea							4:3586931-3587454											chr4:3617079-3617912	4				TRUE
cg08119153	-7.06377	5.32e-06	0.00577066	-0.158378	HYPO	chr14	78913301	-	NRXN3	NRXN3;NRXN3	II			NA	NA	NA	NA	NA	NA		OpenSea	NM_004796;NR_073547	5'UTR;Body								NRXN3	ENST00000554719.1	5'UTR	NRXN3;NRXN3;NRXN3	ENST00000556088.1;ENST00000553631.1;ENST00000554719.1	5'UTR;5'UTR;5'UTR	chr14:78913240-78913470	3
cg10445915	7.06242	5.33e-06	0.00577125	0.143499	HYPER	chr6	158194559	+			II			NA	NA	NA	NA	NA	NA		OpenSea						TRUE										chr6:158194020-158194815	3
cg18858976	-7.06196	5.33e-06	0.00577125	-0.448677	HYPO	chr20	18122858	+	PET117,CSRP2BP	PET117;CSRP2BP	II			NA	NA	NA	NA	NA	NA	chr20:18117962-18118989	S_Shelf	NM_001164811;NM_020536	Body;TSS200								CSRP2BP;CSRP2BP;CSRP2BP;CSRP2BP;CSRP2BP	ENST00000435364.2;ENST00000278816.2;ENST00000278816.2;ENST00000377681.2;ENST00000484001.1	TSS200;ExonBnd;5'UTR;5'UTR;5'UTR	CSRP2BP;CSRP2BP;CSRP2BP;CSRP2BP;CSRP2BP;CSRP2BP;CSRP2BP;CSRP2BP	ENST00000435364.2;ENST00000278816.2;ENST00000278816.2;ENST00000377681.2;ENST00000464792.1;ENST00000489422.1;ENST00000484001.1;ENST00000492286.1	TSS200;ExonBnd;5'UTR;5'UTR;5'UTR;5'UTR;5'UTR;5'UTR								TRUE
cg00424866	-7.06028	5.35e-06	0.00577305	-0.481819	HYPO	chr22	33910250	-	LARGE	LARGE;LARGE	II			NA	NA	NA	NA	NA	NA		OpenSea	NM_004737;NM_133642	Body;Body														chr22:33910005-33910355	3
cg15246590	7.05843	5.36e-06	0.00577305	0.317404	HYPER	chr19	48983600	+	CYTH2,CTC-273B12.8	CYTH2;CYTH2	I	C	Grn	NA	NA	NA	NA	NA	NA	chr19:48983562-48984175	Island	NM_004228;NM_017457	3'UTR;3'UTR				TRUE	19:53675320-53676347	19:48983374-48984648	Promoter_Associated	CYTH2	ENST00000427476.1	3'UTR	CYTH2	ENST00000427476.1	3'UTR	chr19:48983325-48983715	3						TRUE
cg09428582	-7.05793	5.37e-06	0.00577305	-0.22537	HYPO	chr12	7039396	-	ATN1	ATN1;ATN1	II			NA	NA	NA	NA	NA	NA	chr12:7036955-7037924	S_Shore	NM_001007026;NM_001940	5'UTR;5'UTR								ATN1;ATN1	ENST00000356654.3;ENST00000396684.2	5'UTR;5'UTR	ATN1;ATN1	ENST00000356654.3;ENST00000396684.2	5'UTR;5'UTR	chr12:7039320-7039495	3
cg21706229	7.05776	5.37e-06	0.00577305	0.262192	HYPER	chr17	70112877	+	SOX9-AS1		II			NA	NA	NA	NA	NA	NA	chr17:70112824-70114271	Island					CDMR	TRUE	17:67624420-67626485			AC005152.2	ENST00000434703.1	TSS1500	AC005152.2;AC005152.2;AC005152.2;AC005152.2;AC005152.2;AC005152.2	ENST00000434703.1;ENST00000529667.1;ENST00000440093.2;ENST00000533232.1;ENST00000533179.1;ENST00000414600.1	TSS1500;3'UTR;3'UTR;3'UTR;3'UTR;3'UTR	chr17:70112845-70113330	3						TRUE
cg21871141	7.05742	5.37e-06	0.00577305	0.313066	HYPER	chr13	26597180	-	ATP8A2		II			rs7324045	0.000923	NA	NA	NA	NA		OpenSea										ATP8A2	ENST00000381655.2	3'UTR	ATP8A2	ENST00000381655.2	3'UTR	chr13:26596625-26597255	3
cg10987850	7.05518	5.39e-06	0.00578553	0.270318	HYPER	chr1	186051470	-	HMCN1	HMCN1;MIR548F1	II			NA	NA	NA	NA	NA	NA		OpenSea	NM_031935;NR_031642	Body;Body														chr1:186051405-186051710	3
cg23014097	-7.05433	5.4e-06	0.00578553	-0.192358	HYPO	chr2	100854289	+	LINC01104	LINC01104	II			rs11695996	0.309341	NA	NA	NA	NA		OpenSea	NR_103730	Body								AC104782.3	ENST00000452354.1	5'UTR	AC104782.3	ENST00000452354.1	5'UTR	chr2:100854280-100854515	3
cg16205844	7.05256	5.41e-06	0.00578754	0.216515	HYPER	chr12	124872143	+	NCOR2	NCOR2;NCOR2	II			NA	NA	NA	NA	NA	NA	chr12:124872135-124872419	Island	NM_006312;NM_001077261	Body;Body				TRUE	12:123438034-123438268	12:124872028-124872273	Unclassified_Cell_type_specific							chr12:124872085-124872535	3						TRUE
cg01649602	7.05232	5.41e-06	0.00578754	0.0470183	HYPER	chr9	130284277	+	FAM129B	FAM129B;FAM129B	II			rs75249885	0.015625	NA	NA	NA	NA		OpenSea	NM_022833;NM_001035534	Body;Body								FAM129B	ENST00000468379.1	3'UTR	FAM129B;FAM129B;FAM129B	ENST00000478917.1;ENST00000468379.1;ENST00000484348.1	3'UTR;3'UTR;3'UTR	chr9:130283240-130284715	3
cg15571686	7.05006	5.43e-06	0.00578754	0.370281	HYPER	chr13	113411162	+	ATP11A	ATP11A;ATP11A	I	C	Grn	rs144409600	0.0636	NA	NA	NA	NA	chr13:113410004-113410362	S_Shore	NM_015205;NM_032189	Body;Body					13:112459076-112459220			ATP11A	ENST00000466946.1	5'UTR	ATP11A	ENST00000466946.1	5'UTR	chr13:113411020-113411310	3						TRUE
cg05778278	7.04945	5.44e-06	0.00578754	0.282378	HYPER	chr8	54505303	-			II			NA	NA	NA	NA	NA	NA	chr8:54507107-54507358	N_Shore																chr8:54505085-54505315	3						TRUE
cg03471940	7.04937	5.44e-06	0.00578754	0.260984	HYPER	chr17	77893073	+	RP11-353N14.5	LOC101928738;LOC101928766	II			NA	NA	NA	NA	NA	NA		OpenSea	NR_110851;NR_110850	TSS200;Body								RP11-353N14.4;RP11-353N14.4;RP11-353N14.5	ENST00000574526.1;ENST00000572353.1;ENST00000576738.1	TSS200;TSS200;3'UTR	RP11-353N14.4;RP11-353N14.4;RP11-353N14.5	ENST00000574526.1;ENST00000572353.1;ENST00000576738.1	TSS200;TSS200;3'UTR	chr17:77892820-77893335	3
cg03761084	-7.04861	5.45e-06	0.00578754	-0.114198	HYPO	chr11	46511608	+	AMBRA1	AMBRA1;AMBRA1;AMBRA1;AMBRA1	II			NA	NA	NA	NA	NA	NA		OpenSea	NM_001300731;NM_001267783;NM_001267782;NM_017749	Body;Body;Body;Body						11:46511580-46511844	Gene_Associated_Cell_type_specific	AMBRA1	ENST00000314823.6	3'UTR	AMBRA1;AMBRA1	ENST00000529553.1;ENST00000314823.6	3'UTR;3'UTR	chr11:46511565-46511835	3
cg02749105	7.04733	5.46e-06	0.00578754	0.253769	HYPER	chr19	58879056	-	ZNF837	ZNF837;ZNF837	II			NA	NA	NA	NA	NA	NA	chr19:58878386-58880634	Island	NM_001129730;NM_138466	3'UTR;3'UTR					19:63570834-63572417			ZNF837	ENST00000427624.1	3'UTR	ZNF837	ENST00000427624.1	3'UTR			chr19:58877029-58881706	6				TRUE
cg03687464	7.04724	5.46e-06	0.00578754	0.146624	HYPER	chr14	101543120	-	AL132709.1		II			NA	NA	NA	NA	NA	NA		OpenSea										AL132709.1;AL132709.1;AL132709.1;AL132709.1;AL132709.1	ENST00000555599.1;ENST00000448840.2;ENST00000555103.1;ENST00000556136.1;ENST00000556035.1	3'UTR;3'UTR;3'UTR;3'UTR;TSS200	AL132709.1;AL132709.1;AL132709.1;AL132709.1;AL132709.1	ENST00000555599.1;ENST00000448840.2;ENST00000555103.1;ENST00000556136.1;ENST00000556035.1	3'UTR;3'UTR;3'UTR;3'UTR;TSS200	chr14:101542945-101543615	3
cg08662168	7.04515	5.48e-06	0.00579894	0.342524	HYPER	chr17	9976437	+	GAS7	GAS7	II			NA	NA	NA	NA	NA	NA		OpenSea	NM_201433	Body				TRUE		17:9976187-9976450	Unclassified_Cell_type_specific	GAS7	ENST00000540214.1	5'UTR	GAS7	ENST00000540214.1	5'UTR	chr17:9976345-9976635	3						TRUE
cg00610692	7.04149	5.51e-06	0.00582136	0.203662	HYPER	chr2	74668072	+	RTKN	RTKN;RTKN;RTKN	II			NA	NA	NA	NA	NA	NA	chr2:74667593-74669403	Island	NM_001015055;NM_033046;NM_001015056	Body;TSS1500;TSS1500					2:74521141-74522952	2:74667057-74668479	Unclassified	RTKN;RTKN;RTKN	ENST00000305557.5;ENST00000233330.6;ENST00000484453.1	TSS1500;TSS1500;3'UTR	RTKN;RTKN;RTKN;RTKN;RTKN;RTKN	ENST00000460968.1;ENST00000305557.5;ENST00000233330.6;ENST00000479256.1;ENST00000472518.1;ENST00000484453.1	TSS1500;TSS1500;TSS1500;3'UTR;3'UTR;3'UTR	chr2:74667860-74668550	3						TRUE
cg01194310	-7.04102	5.51e-06	0.00582136	-0.208519	HYPO	chr5	133463984	-	TCF7	TCF7;TCF7;TCF7;TCF7;TCF7;TCF7	II			NA	NA	NA	NA	NA	NA		OpenSea	NM_003202;NR_033449;NM_001134851;NM_201634;NM_201632;NM_213648	Body;Body;Body;Body;Body;Body		chr5:133463735-133463735									TCF7;TCF7	ENST00000522653.1;ENST00000519165.1	5'UTR;5'UTR	chr5:133463780-133464115	3
cg21401589	7.0377	5.54e-06	0.00584428	0.176355	HYPER	chr10	123735108	-		NSMCE4A;NSMCE4A	II			rs2420973	0.012733	NA	NA	NA	NA	chr10:123734027-123734865	S_Shore	NM_001167865;NM_017615	TSS1500;TSS1500								NSMCE4A;NSMCE4A;NSMCE4A;NSMCE4A	ENST00000538652.1;ENST00000369017.5;ENST00000489266.1;ENST00000369023.3	TSS1500;TSS1500;TSS1500;TSS1500	NSMCE4A;NSMCE4A;NSMCE4A;NSMCE4A;NSMCE4A;NSMCE4A;NSMCE4A;NSMCE4A;NSMCE4A;NSMCE4A	ENST00000468209.1;ENST00000482078.1;ENST00000472431.1;ENST00000538652.1;ENST00000481320.1;ENST00000464321.1;ENST00000465189.1;ENST00000369017.5;ENST00000489266.1;ENST00000369023.3	TSS1500;TSS1500;TSS1500;TSS1500;TSS1500;TSS1500;TSS1500;TSS1500;TSS1500;TSS1500	chr10:123734925-123735155	3
cg06183169	-7.03378	5.58e-06	0.00587293	-0.308682	HYPO	chr5	88128053	-	MEF2C	MEF2C;MEF2C;MEF2C;MEF2C	II			NA	NA	NA	NA	NA	NA		OpenSea	NM_001193350;NM_002397;NM_001193347;NM_001131005	5'UTR;5'UTR;5'UTR;5'UTR								MEF2C;MEF2C;MEF2C;MEF2C;MEF2C;MEF2C;MEF2C;MEF2C	ENST00000508569.1;ENST00000510942.1;ENST00000514028.1;ENST00000514015.1;ENST00000437473.2;ENST00000504921.2;ENST00000340208.5;ENST00000424173.2	5'UTR;5'UTR;5'UTR;5'UTR;5'UTR;5'UTR;5'UTR;5'UTR	MEF2C;MEF2C;MEF2C;MEF2C;MEF2C;MEF2C;MEF2C;MEF2C;MEF2C;MEF2C;MEF2C;MEF2C;MEF2C;MEF2C;MEF2C	ENST00000511086.1;ENST00000508610.1;ENST00000513252.1;ENST00000508569.1;ENST00000510942.1;ENST00000514028.1;ENST00000514015.1;ENST00000503075.1;ENST00000437473.2;ENST00000504921.2;ENST00000502983.1;ENST00000340208.5;ENST00000424173.2;ENST00000515093.1;ENST00000509349.1	3'UTR;5'UTR;5'UTR;5'UTR;5'UTR;5'UTR;5'UTR;5'UTR;5'UTR;5'UTR;5'UTR;5'UTR;5'UTR;3'UTR;3'UTR			chr5:88127639-88128315	4
cg15803614	7.03057	5.6e-06	0.00589509	0.0882603	HYPER	chr19	3062955	-	AES	AES;AES;AES;AES	II			NA	NA	NA	NA	NA	NA	chr19:3061188-3061952	S_Shore	NM_198970;NM_198969;NM_001130;NM_198969	TSS1500;1stExon;TSS1500;5'UTR	high-CpG:3012138-3014001					19:3062950-3063019	Promoter_Associated	AES;AES;AES	ENST00000221561.7;ENST00000221561.7;ENST00000327141.3	1stExon;5'UTR;TSS1500	AES;AES;AES	ENST00000221561.7;ENST00000221561.7;ENST00000327141.3	1stExon;5'UTR;TSS1500	chr19:3062705-3063230	3						TRUE
cg10843537	7.02629	5.64e-06	0.00592601	0.168257	HYPER	chr12	123526216	+	PITPNM2	PITPNM2;PITPNM2	II			NA	NA	NA	NA	NA	NA		OpenSea	NM_020845;NM_001300801	5'UTR;5'UTR								PITPNM2;PITPNM2;PITPNM2	ENST00000546049.1;ENST00000320201.4;ENST00000280562.5	3'UTR;5'UTR;5'UTR	PITPNM2;PITPNM2;PITPNM2;PITPNM2;PITPNM2;PITPNM2;PITPNM2	ENST00000546049.1;ENST00000451868.2;ENST00000535289.1;ENST00000541244.1;ENST00000320201.4;ENST00000280562.5;ENST00000542210.1	3'UTR;3'UTR;3'UTR;5'UTR;5'UTR;5'UTR;5'UTR	chr12:123525585-123526235	3
cg26879644	7.0256	5.65e-06	0.00592601	0.245461	HYPER	chr15	92238013	+			II			NA	NA	NA	NA	NA	NA		OpenSea						TRUE										chr15:92237905-92238115	3						TRUE
cg09290314	7.02163	5.68e-06	0.00593742	0.214357	HYPER	chr16	86742203	+			II			rs8052496	0.046249	NA	NA	NA	NA		OpenSea																chr16:86742145-86742455	3
cg26753918	7.02047	5.7e-06	0.00593742	0.355833	HYPER	chr14	24540526	-	CPNE6	CPNE6;CPNE6	II			NA	NA	NA	NA	NA	NA		OpenSea	NM_006032;NM_001280558	TSS200;Body								CPNE6;CPNE6;CPNE6	ENST00000560092.1;ENST00000216775.2;ENST00000397016.2	TSS1500;TSS1500;5'UTR	CPNE6;CPNE6;CPNE6;CPNE6;CPNE6;CPNE6;CPNE6;CPNE6;CPNE6;CPNE6;CPNE6;CPNE6;CPNE6;CPNE6;CPNE6;CPNE6;CPNE6;CPNE6	ENST00000558859.1;ENST00000560092.1;ENST00000559197.1;ENST00000216775.2;ENST00000560884.1;ENST00000558795.1;ENST00000559207.1;ENST00000460657.1;ENST00000397016.2;ENST00000560356.1;ENST00000558450.1;ENST00000558995.1;ENST00000559778.1;ENST00000560761.1;ENST00000558541.1;ENST00000557889.1;ENST00000557889.1;ENST00000558995.1	TSS1500;TSS1500;TSS1500;TSS1500;TSS1500;TSS1500;TSS1500;TSS1500;5'UTR;5'UTR;5'UTR;1stExon;5'UTR;5'UTR;TSS200;1stExon;5'UTR;5'UTR	chr14:24540285-24540955	3
cg26215727	7.02033	5.7e-06	0.00593742	0.100626	HYPER	chr12	6485537	-	SCNN1A,LTBR	SCNN1A;SCNN1A;SCNN1A	II			NA	NA	NA	NA	NA	NA		OpenSea	NM_001159575;NM_001159576;NM_001038	Body;TSS1500;TSS1500				TRUE		12:6485487-6486928	Unclassified	SCNN1A;SCNN1A;SCNN1A;LTBR	ENST00000360168.3;ENST00000538979.1;ENST00000228916.2;ENST00000546296.1	TSS1500;TSS1500;TSS1500;5'UTR	SCNN1A;SCNN1A;SCNN1A;SCNN1A;SCNN1A;SCNN1A;SCNN1A;SCNN1A;SCNN1A;SCNN1A;LTBR;LTBR	ENST00000538957.1;ENST00000545605.1;ENST00000542436.1;ENST00000543585.1;ENST00000360168.3;ENST00000536176.1;ENST00000538979.1;ENST00000228916.2;ENST00000544882.1;ENST00000536411.1;ENST00000546296.1;ENST00000542830.1	3'UTR;3'UTR;TSS1500;TSS1500;TSS1500;TSS1500;TSS1500;TSS1500;TSS1500;TSS1500;5'UTR;5'UTR	chr12:6485140-6486175	3					TRUE	TRUE
cg10852895	7.02019	5.7e-06	0.00593742	0.206963	HYPER	chr15	100520897	+	ADAMTS17,CTD-3076O17.2	ADAMTS17	II			NA	NA	NA	NA	NA	NA		OpenSea	NM_139057	Body								CTD-3076O17.2	ENST00000559400.1	5'UTR	CTD-3076O17.2	ENST00000559400.1	5'UTR			chr15:100520839-100521870	6
cg26218411	7.01985	5.7e-06	0.00593742	0.109725	HYPER	chr15	59226409	-	RNF111	SLTM;SLTM	II			NA	NA	NA	NA	NA	NA	chr15:59225272-59226300	S_Shore	NM_001013843;NM_024755	TSS1500;TSS1500						15:59225018-59226807	Promoter_Associated	SLTM;SLTM;SLTM	ENST00000557950.1;ENST00000536328.1;ENST00000380516.2	TSS1500;TSS1500;TSS1500	SLTM;SLTM;SLTM;SLTM;SLTM;SLTM;SLTM;SLTM;SLTM;SLTM;SLTM;RNF111	ENST00000558756.1;ENST00000557950.1;ENST00000558486.1;ENST00000559305.1;ENST00000492526.1;ENST00000560012.1;ENST00000559880.1;ENST00000557924.1;ENST00000480144.1;ENST00000474342.1;ENST00000380516.2;ENST00000559757.1	TSS1500;TSS1500;TSS1500;TSS1500;TSS1500;TSS1500;TSS1500;TSS1500;TSS1500;TSS1500;TSS1500;5'UTR	chr15:59224900-59226475	3						TRUE
cg18705622	-7.01936	5.71e-06	0.00593742	-0.420976	HYPO	chr3	167446693	-	PDCD10	PDCD10;PDCD10;PDCD10	II			NA	NA	NA	NA	NA	NA		OpenSea	NM_007217;NM_145860;NM_145859	5'UTR;5'UTR;5'UTR								PDCD10;PDCD10;PDCD10;PDCD10;PDCD10;PDCD10;PDCD10;PDCD10	ENST00000487947.2;ENST00000461494.1;ENST00000392750.2;ENST00000471885.1;ENST00000470131.1;ENST00000497056.2;ENST00000473645.2;ENST00000487678.1	5'UTR;5'UTR;5'UTR;5'UTR;5'UTR;5'UTR;5'UTR;3'UTR	PDCD10;PDCD10;PDCD10;PDCD10;PDCD10;PDCD10;PDCD10;PDCD10;PDCD10;PDCD10;PDCD10;PDCD10;PDCD10;PDCD10;PDCD10	ENST00000483451.1;ENST00000481136.1;ENST00000487947.2;ENST00000475915.2;ENST00000462725.2;ENST00000461494.1;ENST00000392750.2;ENST00000464360.1;ENST00000492139.1;ENST00000471885.1;ENST00000494502.2;ENST00000470131.1;ENST00000497056.2;ENST00000473645.2;ENST00000487678.1	3'UTR;3'UTR;5'UTR;5'UTR;5'UTR;5'UTR;5'UTR;5'UTR;5'UTR;5'UTR;5'UTR;5'UTR;5'UTR;5'UTR;3'UTR	chr3:167446460-167446735	3
cg00962903	-7.01774	5.72e-06	0.00594182	-0.147838	HYPO	chr3	168863028	-	MECOM	MECOM;MECOM;MECOM;MECOM;MECOM;MECOM	II			NA	NA	NA	NA	NA	NA	chr3:168864030-168864449	N_Shore	NM_001163999;NM_004991;NM_001105077;NM_001164000;NM_001105078;NM_005241	5'UTR;Body;5'UTR;5'UTR;5'UTR;5'UTR								MECOM;MECOM;MECOM;MECOM;MECOM	ENST00000264674.3;ENST00000433243.2;ENST00000392736.3;ENST00000468789.1;ENST00000464456.1	5'UTR;5'UTR;5'UTR;5'UTR;5'UTR	MECOM;MECOM;MECOM;MECOM;MECOM;MECOM;MECOM;MECOM;MECOM	ENST00000460890.1;ENST00000264674.3;ENST00000433243.2;ENST00000392736.3;ENST00000475754.1;ENST00000484519.1;ENST00000468789.1;ENST00000464456.1;ENST00000481315.1	1stExon;5'UTR;5'UTR;5'UTR;5'UTR;5'UTR;5'UTR;5'UTR;5'UTR	chr3:168862980-168863295	3						TRUE
cg14370448	7.01654	5.73e-06	0.00594182	0.145285	HYPER	chr16	30103978	-	YPEL3	YPEL3;TBX6;YPEL3	II			NA	NA	NA	NA	NA	NA	chr16:30102816-30103695	S_Shore	NM_031477;NM_004608;NM_001145524	3'UTR;TSS1500;3'UTR					16:30010177-30011499	16:30102671-30104519	Promoter_Associated	TBX6;TBX6;TBX6;YPEL3;YPEL3;RP11-455F5.2;YPEL3;YPEL3;YPEL3;YPEL3	ENST00000279386.2;ENST00000395224.2;ENST00000553607.1;ENST00000398841.1;ENST00000565479.1;ENST00000569011.1;ENST00000566134.1;ENST00000398838.4;ENST00000563788.1;ENST00000566595.1	TSS1500;TSS1500;TSS1500;3'UTR;3'UTR;5'UTR;3'UTR;3'UTR;3'UTR;3'UTR	TBX6;TBX6;TBX6;TBX6;YPEL3;YPEL3;YPEL3;RP11-455F5.2;YPEL3;YPEL3;YPEL3;YPEL3	ENST00000567664.1;ENST00000279386.2;ENST00000395224.2;ENST00000553607.1;ENST00000398841.1;ENST00000570099.1;ENST00000565479.1;ENST00000569011.1;ENST00000566134.1;ENST00000398838.4;ENST00000563788.1;ENST00000566595.1	TSS1500;TSS1500;TSS1500;TSS1500;3'UTR;3'UTR;3'UTR;5'UTR;3'UTR;3'UTR;3'UTR;3'UTR	chr16:30103885-30104210	3					TRUE	TRUE
cg18697160	7.01639	5.73e-06	0.00594182	0.120331	HYPER	chr10	134184523	-	LRRC27	LRRC27;LRRC27	I	T	Red	NA	NA	NA	NA	NA	NA		OpenSea	NM_001143757;NM_030626	Body;Body					10:134034465-134034682			LRRC27;LRRC27	ENST00000475747.1;ENST00000392638.2	5'UTR;3'UTR	LRRC27;LRRC27;LRRC27	ENST00000462656.1;ENST00000475747.1;ENST00000392638.2	5'UTR;5'UTR;3'UTR			chr10:134184189-134185750	6				TRUE
cg14735905	7.01363	5.76e-06	0.00594223	0.141897	HYPER	chr14	105045767	-	TMEM179	C14orf180;C14orf180	II			NA	NA	NA	NA	NA	NA		OpenSea	NM_001008404;NM_001286399	TSS1500;TSS1500								C14orf180;C14orf180;C14orf180	ENST00000557649.1;ENST00000331952.2;ENST00000553873.1	TSS1500;TSS1500;TSS1500	C14orf180;C14orf180;C14orf180	ENST00000557649.1;ENST00000331952.2;ENST00000553873.1	TSS1500;TSS1500;TSS1500			chr14:105040969-105072397	6
cg24255269	-7.0133	5.76e-06	0.00594223	-0.176	HYPO	chr3	138952528	-	MRPS22	PISRT1	II			NA	NA	NA	NA	NA	NA		OpenSea	NR_027070	TSS200								MRPS22	ENST00000495075.1	5'UTR	MRPS22	ENST00000495075.1	5'UTR								TRUE
cg25820858	7.01284	5.76e-06	0.00594223	0.0763963	HYPER	chr1	159824917	-	C1orf204,VSIG8	VSIG8;C1orf204	II			NA	NA	NA	NA	NA	NA	chr1:159824006-159825011	Island	NM_001013661;NM_001134233	Body;Body					1:158090642-158091676	1:159824016-159825220	Promoter_Associated_Cell_type_specific	C1orf204	ENST00000491974.1	TSS1500	C1orf204	ENST00000491974.1	TSS1500	chr1:159824885-159825135	3						TRUE
cg15155766	7.01256	5.77e-06	0.00594223	0.147055	HYPER	chr11	119865842	-			II			rs7125556	0.084546	NA	NA	NA	NA		OpenSea										RP11-831A10.2;RP11-831A10.2	ENST00000526934.1;ENST00000524708.1	TSS1500;TSS200	RP11-831A10.2;RP11-831A10.2	ENST00000526934.1;ENST00000524708.1	TSS1500;TSS200
cg13969246	7.0122	5.77e-06	0.00594223	0.111603	HYPER	chr14	71188667	-			II			NA	NA	NA	NA	NA	NA		OpenSea
cg25527554	7.00902	5.8e-06	0.00595556	0.100567	HYPER	chr20	36515553	-			II			NA	NA	NA	NA	NA	NA		OpenSea																chr20:36515420-36515715	3
cg12090942	7.0078	5.81e-06	0.00595556	0.0704383	HYPER	chr14	77279508	-	ANGEL1	ANGEL1	II			NA	NA	NA	NA	NA	NA	chr14:77278573-77279409	S_Shore	NM_015305	TSS1500						14:77278394-77280037	Promoter_Associated	ANGEL1;ANGEL1	ENST00000554941.1;ENST00000251089.2	TSS1500;TSS1500	ANGEL1;ANGEL1;ANGEL1;ANGEL1	ENST00000554941.1;ENST00000556298.1;ENST00000251089.2;ENST00000557497.1	TSS1500;TSS1500;TSS1500;3'UTR			chr14:77276955-77280009	6	chr14:77276866-77279789	6		TRUE
cg15006082	7.00534	5.83e-06	0.00595556	0.134709	HYPER	chr22	17517921	-	CECR7	CECR7	II			NA	NA	NA	NA	NA	NA	chr22:17516913-17518500	Island	NR_015352	Body					22:15897329-15898465			CECR7;CECR7;CECR7	ENST00000441006.1;ENST00000414401.1;ENST00000441006.1	1stExon;TSS200;5'UTR	CECR7;CECR7;CECR7	ENST00000441006.1;ENST00000414401.1;ENST00000441006.1	1stExon;TSS200;5'UTR	chr22:17516880-17518695	3
cg14103147	7.00534	5.83e-06	0.00595556	0.241877	HYPER	chr9	112299270	-			II			NA	NA	NA	NA	NA	NA	chr9:112296438-112296747	S_Shelf																chr9:112299185-112299455	3						TRUE
cg11122944	7.00493	5.84e-06	0.00595556	0.121978	HYPER	chr17	9924800	-	GAS7	GAS7;GAS7;GAS7	II			NA	NA	NA	NA	NA	NA		OpenSea	NM_201432;NM_201433;NM_001130831	Body;Body;5'UTR				TRUE		17:9924606-9924811	Unclassified_Cell_type_specific	GAS7;GAS7;GAS7	ENST00000542249.1;ENST00000437099.1;ENST00000540214.1	TSS1500;5'UTR;5'UTR	GAS7;GAS7;GAS7	ENST00000542249.1;ENST00000437099.1;ENST00000540214.1	TSS1500;5'UTR;5'UTR	chr17:9924620-9924850	3						TRUE
cg07876223	-7.00476	5.84e-06	0.00595556	-0.277894	HYPO	chr6	14839147	-			II			rs62390282	0.018229	NA	NA	NA	NA		OpenSea						TRUE																	TRUE
cg05181918	7.00429	5.84e-06	0.00595556	0.0912183	HYPER	chr22	25509660	-	KIAA1671	LOC100128531;KIAA1671	II			NA	NA	NA	NA	NA	NA	chr22:25507309-25507537	S_Shelf	NR_038941;NM_001145206	TSS1500;Body								CTA-221G9.11	ENST00000366110.3	TSS1500	CTA-221G9.11;KIAA1671	ENST00000366110.3;ENST00000494730.2	TSS1500;5'UTR	chr22:25509325-25509815	3
cg17347171	7.00422	5.84e-06	0.00595556	0.31575	HYPER	chr1	201304856	+			II			NA	NA	NA	NA	NA	NA		OpenSea																		chr1:201304259-201305065	5
cg20283235	6.99946	5.89e-06	0.00599319	0.191577	HYPER	chr16	50407225	+			II			NA	NA	NA	NA	NA	NA		OpenSea						TRUE										chr16:50406825-50407330	3
cg18891081	-6.99776	5.91e-06	0.0060017	-0.13624	HYPO	chr2	47382427	-	C2orf61,RP11-761B3.1	C2orf61;C2orf61;C2orf61;C2orf61	II			NA	NA	NA	NA	NA	NA		OpenSea	NM_001163561;NM_173649;NM_001163561;NM_173649	1stExon;1stExon;5'UTR;5'UTR					2:47235673-47236072			C2orf61;C2orf61;C2orf61;CALM2	ENST00000445927.2;ENST00000445927.2;ENST00000294947.2;ENST00000422269.1	1stExon;5'UTR;TSS200;3'UTR	C2orf61;C2orf61;C2orf61;CALM2	ENST00000445927.2;ENST00000445927.2;ENST00000294947.2;ENST00000422269.1	1stExon;5'UTR;TSS200;3'UTR	chr2:47382305-47382595	3						TRUE
cg22782074	-6.99443	5.94e-06	0.006018	-0.145651	HYPO	chr16	49814608	+	ZNF423	ZNF423;ZNF423	II			NA	NA	NA	NA	NA	NA		OpenSea	NM_015069;NM_001271620	Body;5'UTR								ZNF423;ZNF423;ZNF423	ENST00000562871.1;ENST00000563137.2;ENST00000562520.1	TSS200;5'UTR;5'UTR	ZNF423;ZNF423;ZNF423;ZNF423	ENST00000562871.1;ENST00000568094.1;ENST00000563137.2;ENST00000562520.1	TSS200;3'UTR;5'UTR;5'UTR	chr16:49814425-49814730	3
cg00606841	6.99371	5.94e-06	0.006018	0.0746749	HYPER	chr21	40757691	-	WRB	WRB	II			NA	NA	NA	NA	NA	NA	chr21:40757602-40757900	Island	NM_004627	Body					21:39679026-39679902	21:40757648-40758181	Promoter_Associated_Cell_type_specific	WRB	ENST00000398753.1	5'UTR	WRB;WRB;WRB;WRB;WRB;TMPRSS3	ENST00000471468.1;ENST00000398753.1;ENST00000442773.1;ENST00000380713.3;ENST00000487869.1;ENST00000553129.1	5'UTR;5'UTR;5'UTR;TSS1500;5'UTR;3'UTR	chr21:40757680-40758490	3						TRUE
cg24310786	6.99362	5.94e-06	0.006018	0.213164	HYPER	chr6	33080054	-		HLA-DPB2	II			NA	NA	NA	NA	NA	NA		OpenSea	NR_001435	TSS1500						6:33079977-33080306	Unclassified	HLA-DPB2	ENST00000435074.1	TSS200	HLA-DPB2	ENST00000435074.1	TSS200	chr6:33080020-33080255	3						TRUE
cg27042278	6.99121	5.97e-06	0.00602616	0.0951268	HYPER	chr14	91720527	+		GPR68	II			NA	NA	NA	NA	NA	NA	chr14:91719576-91720228	S_Shore	NM_003485	TSS1500						14:91719119-91720759	Promoter_Associated	GPR68;GPR68	ENST00000238699.3;ENST00000531499.2	TSS1500;TSS1500	GPR68;GPR68	ENST00000238699.3;ENST00000531499.2	TSS1500;TSS1500	chr14:91720245-91720595	3						TRUE
cg23106493	-6.99052	5.97e-06	0.00602616	-0.160459	HYPO	chr16	71053249	+	HYDIN	HYDIN	II			NA	NA	NA	NA	NA	NA		OpenSea	NM_001270974	Body											HYDIN;HYDIN	ENST00000538568.1;ENST00000393552.2	3'UTR;3'UTR	chr16:71053020-71053395	3
cg13519194	6.98915	5.99e-06	0.00602616	0.0999756	HYPER	chr10	43539572	-			I	A	Red	NA	NA	NA	NA	NA	NA		OpenSea						TRUE										chr10:43539265-43539855	3						TRUE
cg13340144	6.98908	5.99e-06	0.00602616	0.0683435	HYPER	chr17	79485951	+	ACTG1,RP13-766D20.2		I	A	Red	NA	NA	NA	NA	NA	NA	chr17:79485599-79486913	Island						TRUE	17:77100212-77101389	17:79485910-79487049	Unclassified	RP13-766D20.2;RP13-766D20.2	ENST00000430912.1;ENST00000442532.1	5'UTR;TSS200	ACTG1;RP13-766D20.2;RP13-766D20.2	ENST00000575994.1;ENST00000430912.1;ENST00000442532.1	5'UTR;5'UTR;TSS200	chr17:79485265-79486310	3
cg24093545	6.98873	5.99e-06	0.00602616	0.17293	HYPER	chr17	79304787	-		TMEM105	II			NA	NA	NA	NA	NA	NA		OpenSea	NM_178520	TSS1500								TMEM105;TMEM105	ENST00000571868.1;ENST00000332900.1	TSS1500;TSS1500	TMEM105;TMEM105;TMEM105;TMEM105;TMEM105	ENST00000577027.1;ENST00000574093.1;ENST00000571868.1;ENST00000576919.1;ENST00000332900.1	TSS1500;TSS1500;TSS1500;TSS1500;TSS1500			chr17:79301772-79306342	6
cg25083618	-6.98303	6.05e-06	0.00606405	-0.375947	HYPO	chr10	94820988	+		CYP26C1	I	C	Grn	NA	NA	NA	NA	NA	NA	chr10:94820026-94823252	Island	NM_183374	TSS200					10:94809776-94811385	10:94820882-94821041	Unclassified_Cell_type_specific	RP11-348J12.2;CYP26C1	ENST00000444965.1;ENST00000285949.5	TSS1500;TSS200	RP11-348J12.2;CYP26C1	ENST00000444965.1;ENST00000285949.5	TSS1500;TSS200	chr10:94820925-94821315	3						TRUE
cg27545451	6.9829	6.05e-06	0.00606405	0.105642	HYPER	chr19	18745988	+			II			NA	NA	NA	NA	NA	NA		OpenSea					RDMR											chr19:18745700-18746375	3
cg16374343	6.98239	6.05e-06	0.00606405	0.0683127	HYPER	chr17	1014352	-	ABR	ABR;ABR	II			NA	NA	NA	NA	NA	NA	chr17:1011844-1012968	S_Shore	NM_021962;NM_001159746	Body;Body		chr17:1014015-1014015				17:1014121-1014371	Unclassified_Cell_type_specific	ABR	ENST00000382259.2	5'UTR	ABR;ABR	ENST00000570441.1;ENST00000382259.2	5'UTR;5'UTR	chr17:1013305-1015290	3						TRUE
cg26355557	-6.98063	6.07e-06	0.00606677	-0.251434	HYPO	chr13	53771923	+			II			NA	NA	NA	NA	NA	NA	chr13:53774264-53776345	N_Shelf																				chr13:53771516-53772540	6
cg26772172	6.98051	6.07e-06	0.00606677	0.134476	HYPER	chr17	77474395	-	RBFOX3	HRNBP3	II			NA	NA	NA	NA	NA	NA		OpenSea	NM_001082575	5'UTR					17:74985775-74985991			RBFOX3;RBFOX3	ENST00000415831.1;ENST00000453134.2	5'UTR;5'UTR	RBFOX3;RBFOX3	ENST00000415831.1;ENST00000453134.2	5'UTR;5'UTR	chr17:77474180-77474575	3						TRUE
cg11030811	6.97806	6.09e-06	0.00606849	0.35198	HYPER	chr13	25743608	-	AMER2	FAM123A;FAM123A;FAM123A	I	C	Grn	NA	NA	NA	NA	NA	NA	chr13:25743998-25746127	N_Shore	NM_152704;NM_199138;NM_152704	3'UTR;3'UTR;1stExon								FAM123A;FAM123A;FAM123A;FAM123A	ENST00000381853.3;ENST00000515384.1;ENST00000515384.1;ENST00000357816.2	3'UTR;3'UTR;1stExon;3'UTR	FAM123A;FAM123A;FAM123A;FAM123A	ENST00000381853.3;ENST00000515384.1;ENST00000515384.1;ENST00000357816.2	3'UTR;3'UTR;1stExon;3'UTR								TRUE
cg15171839	-6.9771	6.1e-06	0.00606849	-0.307956	HYPO	chr5	92924603	+	NR2F1	NR2F1	II			NA	NA	NA	NA	NA	NA	chr5:92923487-92924497	S_Shore	NM_005654	Body			RDMR		5:92949226-92950360									chr5:92924265-92924750	3						TRUE
cg24171992	6.97636	6.11e-06	0.00606849	0.135889	HYPER	chr19	18212279	-	MAST3	MAST3	II			NA	NA	NA	NA	NA	NA	chr19:18209911-18210268	S_Shelf	NM_015016	Body														chr19:18212185-18212390	3						TRUE
cg17232973	6.97574	6.12e-06	0.00606849	0.2848	HYPER	chr4	154970741	-			II			NA	NA	NA	NA	NA	NA		OpenSea																chr4:154970685-154970910	3
cg09621868	6.97518	6.12e-06	0.00606849	0.234303	HYPER	chr13	58210058	+	PCDH17	PCDH17	II			NA	NA	NA	NA	NA	NA	chr13:58206526-58208930	S_Shore	NM_001040429	Body
cg05039202	6.97507	6.12e-06	0.00606849	0.30499	HYPER	chr2	80295043	-	CTNNA2	CTNNA2;CTNNA2	II			rs13389699	0.024245	NA	NA	NA	NA		OpenSea	NM_004389;NM_001164883	Body;Body				TRUE																	TRUE
cg26552163	6.97476	6.13e-06	0.00606849	0.162809	HYPER	chr16	1589859	-	IFT140,TMEM204	IFT140;TMEM204	II			NA	NA	NA	NA	NA	NA	chr16:1591813-1592107	N_Shore	NM_014714;NM_024600	Body;Body					16:1529571-1530231						IFT140;IFT140	ENST00000397417.2;ENST00000565298.1	3'UTR;3'UTR	chr16:1589265-1589915	3						TRUE
cg08998212	-6.97325	6.14e-06	0.00606972	-0.0593144	HYPO	chr2	105761644	-	AC104655.3		II			NA	NA	NA	NA	NA	NA	chr2:105760109-105761018	S_Shore					CDMR			2:105761546-105761716	Unclassified_Cell_type_specific	AC104655.3;AC104655.3	ENST00000436841.1;ENST00000438148.1	5'UTR;5'UTR	AC104655.3;AC104655.3	ENST00000436841.1;ENST00000438148.1	5'UTR;5'UTR	chr2:105760725-105761735	3						TRUE
cg04160427	-6.97263	6.15e-06	0.00606972	-0.302179	HYPO	chr7	132427222	-			II			NA	NA	NA	NA	NA	NA		OpenSea																chr7:132427000-132427295	3
cg00482101	6.97156	6.16e-06	0.00606972	0.0975417	HYPER	chr6	3161174	+			II			NA	NA	NA	NA	NA	NA	chr6:3162832-3163523	N_Shore								6:3159659-3161279	Unclassified							chr6:3160405-3161215	3
cg02128191	6.97147	6.16e-06	0.00606972	0.294414	HYPER	chr10	669285	-	DIP2C	DIP2C	II			NA	NA	NA	NA	NA	NA	chr10:669070-669336	Island	NM_014974	Body																chr10:669202-671764	6				TRUE
cg26860750	6.9698	6.17e-06	0.00607573	0.0945738	HYPER	chr10	98955810	-	ARHGAP19-SLIT1		II			NA	NA	NA	NA	NA	NA	chr10:98955994-98956285	N_Shore						TRUE		10:98955636-98956963	Unclassified							chr10:98955685-98956655	3						TRUE
cg19817455	-6.96928	6.18e-06	0.00607573	-0.270374	HYPO	chr17	5104507	+	RP11-333E1.1	LOC100130950	II			NA	NA	rs73333445	0.012351	rs73333445	0.012351		OpenSea	NR_034082	Body								RP11-333E1.1;RP11-333E1.1	ENST00000575601.1;ENST00000571689.1	5'UTR;5'UTR	RP11-333E1.1;RP11-333E1.1	ENST00000575601.1;ENST00000571689.1	5'UTR;5'UTR	chr17:5104365-5104690	3
cg21844144	-6.96761	6.2e-06	0.0060775	-0.0866987	HYPO	chr11	68920550	+	RP11-554A11.8		II			NA	NA	NA	NA	NA	NA		OpenSea						TRUE	11:68676962-68677139			RP11-554A11.8	ENST00000562772.1	3'UTR	RP11-554A11.8	ENST00000562772.1	3'UTR			chr11:68919895-68920831	5				TRUE
cg06365016	6.96753	6.2e-06	0.0060775	0.151868	HYPER	chr12	130821453	-		PIWIL1	II			NA	NA	NA	NA	NA	NA	chr12:130822360-130822696	N_Shore	NM_004764	TSS1500					12:129387406-129387612			PIWIL1	ENST00000245255.3	TSS1500	PIWIL1;PIWIL1;PIWIL1	ENST00000245255.3;ENST00000546060.1;ENST00000539400.1	TSS1500;TSS1500;TSS1500	chr12:130821225-130821815	3						TRUE
cg18733794	6.96572	6.22e-06	0.00608746	0.0965753	HYPER	chr22	19554560	+		LOC150185	II			NA	NA	NA	NA	NA	NA	chr22:19554014-19554413	S_Shore	NR_024381	TSS200					22:17934015-17934831									chr22:19554225-19554850	3						TRUE
cg16741323	6.96062	6.27e-06	0.00611753	0.213852	HYPER	chr13	110918325	-	COL4A1	COL4A1;COL4A1	II			NA	NA	NA	NA	NA	NA	chr13:110918324-110918725	Island	NM_001845;NM_001303110	Body;Body					13:109716165-109716768									chr13:110917740-110918455	3
cg23770265	6.96025	6.27e-06	0.00611753	0.232119	HYPER	chr7	2968559	-	CARD11	CARD11	I	A	Red	NA	NA	NA	NA	NA	NA	chr7:2968234-2968596	Island	NM_032415	Body					7:2934769-2935086									chr7:2968425-2968835	3						TRUE
cg22791053	-6.96008	6.27e-06	0.00611753	-0.116022	HYPO	chr21	36605001	+	RUNX1		II			NA	NA	NA	NA	NA	NA		OpenSea													RUNX1	ENST00000475045.1	3'UTR	chr21:36604865-36605130	3
cg11127587	6.95845	6.29e-06	0.00611753	0.175293	HYPER	chr12	118494258	-	WSB2	WSB2;WSB2;WSB2	II			NA	NA	NA	NA	NA	NA		OpenSea	NM_018639;NM_001278557;NM_001278558	Body;Body;5'UTR						12:118492834-118494775	Unclassified	WSB2;WSB2	ENST00000536738.1;ENST00000544233.1	3'UTR;5'UTR	WSB2;WSB2;WSB2;WSB2;WSB2;WSB2	ENST00000537945.1;ENST00000540129.1;ENST00000536738.1;ENST00000544233.1;ENST00000536602.1;ENST00000542726.1	5'UTR;3'UTR;3'UTR;5'UTR;3'UTR;3'UTR	chr12:118494065-118494430	3
cg13471336	6.95804	6.29e-06	0.00611753	0.323286	HYPER	chr10	669170	-	DIP2C	DIP2C	II			NA	NA	NA	NA	NA	NA	chr10:669070-669336	Island	NM_014974	Body					10:659071-659221																TRUE
cg13887543	6.95797	6.29e-06	0.00611753	0.231093	HYPER	chr22	43796252	+			II			NA	NA	NA	NA	NA	NA		OpenSea										RP4-754E20__A.5	ENST00000450750.1	TSS200	RP4-754E20__A.5	ENST00000450750.1	TSS200	chr22:43795820-43796415	3
cg05245650	6.95655	6.31e-06	0.00612388	0.242186	HYPER	chr2	37900205	+	CDC42EP3	CDC42EP3	II			NA	NA	NA	NA	NA	NA	chr2:37898142-37899830	S_Shore	NM_006449	TSS1500						2:37900178-37900300	Promoter_Associated	CDC42EP3	ENST00000295324.3	TSS1500	CDC42EP3;CDC42EP3;CDC42EP3	ENST00000295324.3;ENST00000457889.1;ENST00000453555.1	TSS1500;TSS1500;5'UTR	chr2:37900100-37900355	3						TRUE
cg23497436	6.95303	6.34e-06	0.00615053	0.198005	HYPER	chr19	55767121	+	PPP6R1	SAPS1	I	A	Red	rs11669313	0.051551	NA	NA	NA	NA	chr19:55769269-55770875	N_Shelf	NM_014931	5'UTR	low-CpG:60458895-60458962		CDMR			19:55766831-55767605	Promoter_Associated	PPP6R1;PPP6R1	ENST00000412770.1;ENST00000444538.1	5'UTR;5'UTR	PPP6R1;PPP6R1	ENST00000412770.1;ENST00000444538.1	5'UTR;5'UTR	chr19:55767005-55767355	3						TRUE
cg14928057	6.95229	6.35e-06	0.00615053	0.0616109	HYPER	chr17	4891542	-	RP5-1050D4.5,INCA1	INCA1;INCA1;CAMTA2;CAMTA2;CAMTA2;INCA1;CAMTA2;INCA1	I	A	Red	NA	NA	NA	NA	NA	NA	chr17:4890282-4890991	S_Shore	NM_213726;NM_001167986;NM_001171167;NM_001171166;NM_015099;NM_001167987;NM_001171168;NM_001167985	3'UTR;3'UTR;TSS1500;TSS1500;TSS1500;3'UTR;TSS1500;3'UTR			RDMR			17:4889617-4891783	Promoter_Associated	CAMTA2;CAMTA2;RP5-1050D4.5;CAMTA2;CAMTA2;CAMTA2;CAMTA2;INCA1;INCA1;INCA1	ENST00000414043.3;ENST00000361571.5;ENST00000574260.1;ENST00000572543.1;ENST00000381311.5;ENST00000348066.3;ENST00000358183.4;ENST00000575780.1;ENST00000396829.2;ENST00000576820.1	TSS1500;TSS1500;5'UTR;TSS1500;TSS1500;TSS1500;TSS1500;3'UTR;3'UTR;3'UTR	CAMTA2;CAMTA2;RP5-1050D4.5;CAMTA2;CAMTA2;CAMTA2;CAMTA2;CAMTA2;INCA1;INCA1;INCA1	ENST00000414043.3;ENST00000361571.5;ENST00000574260.1;ENST00000573004.1;ENST00000572543.1;ENST00000381311.5;ENST00000348066.3;ENST00000358183.4;ENST00000575780.1;ENST00000396829.2;ENST00000576820.1	TSS1500;TSS1500;5'UTR;TSS1500;TSS1500;TSS1500;TSS1500;TSS1500;3'UTR;3'UTR;3'UTR	chr17:4889645-4891955	3						TRUE
cg13393177	6.95077	6.37e-06	0.00615061	0.245812	HYPER	chr1	212400076	-	RP11-15I11.3	LOC101929541;LOC101929541;LOC101929541	II			NA	NA	NA	NA	NA	NA		OpenSea	NR_125982;NR_125983;NR_125984	Body;Body;Body								RP11-15I11.3;RP11-15I11.3;RP11-15I11.3	ENST00000412221.1;ENST00000443448.1;ENST00000431307.1	TSS200;3'UTR;3'UTR	RP11-15I11.3;RP11-15I11.3;RP11-15I11.3	ENST00000412221.1;ENST00000443448.1;ENST00000431307.1	TSS200;3'UTR;3'UTR
cg03006426	6.95073	6.37e-06	0.00615061	0.167709	HYPER	chr5	136826890	-	SPOCK1	SPOCK1	II			NA	NA	NA	NA	NA	NA		OpenSea	NM_004598	Body											SPOCK1;SPOCK1	ENST00000510689.1;ENST00000503916.1	5'UTR;3'UTR	chr5:136826800-136827155	3
cg16870156	-6.949	6.38e-06	0.00616007	-0.257573	HYPO	chr6	130197180	-			II			NA	NA	NA	NA	NA	NA		OpenSea										RP11-73O6.4	ENST00000563385.1	5'UTR	RP11-73O6.4	ENST00000563385.1	5'UTR			chr6:130195923-130197276	6
cg26810690	6.94796	6.39e-06	0.00616281	0.360432	HYPER	chr1	3622130	-	TP73	TP73;TP73;TP73;TP73	I	C	Grn	NA	NA	NA	NA	NA	NA	chr1:3623318-3623521	N_Shore	NM_001126240;NM_005427;NM_001126242;NM_001126241	Body;Body;Body;Body						1:3621962-3622200	Unclassified_Cell_type_specific	TP73	ENST00000378290.4	5'UTR	TP73	ENST00000378290.4	5'UTR			chr1:3618358-3636512	6				TRUE
cg05751110	6.94618	6.41e-06	0.00617273	0.080823	HYPER	chr8	49648436	+		EFCAB1;EFCAB1;EFCAB1	II			NA	NA	NA	NA	NA	NA	chr8:49647702-49647988	S_Shore	NM_024593;NM_001142857;NR_024605	TSS1500;TSS1500;TSS1500				TRUE	8:49810686-49810990			EFCAB1;EFCAB1;EFCAB1;EFCAB1;EFCAB1;AC026904.1	ENST00000450553.2;ENST00000262103.3;ENST00000521002.1;ENST00000523092.1;ENST00000433756.1;ENST00000536671.1	TSS1500;TSS1500;TSS1500;TSS1500;TSS1500;5'UTR	EFCAB1;EFCAB1;EFCAB1;EFCAB1;EFCAB1;EFCAB1;AC026904.1	ENST00000450553.2;ENST00000262103.3;ENST00000521002.1;ENST00000523092.1;ENST00000521701.1;ENST00000433756.1;ENST00000536671.1	TSS1500;TSS1500;TSS1500;TSS1500;TSS1500;TSS1500;5'UTR	chr8:49648145-49648575	3
cg06569229	6.94288	6.45e-06	0.0061979	0.105023	HYPER	chr11	92601301	-	FAT3	FAT3	I	T	Red	NA	NA	NA	NA	NA	NA	chr11:92599941-92600345	S_Shore	NM_001008781	Body																					TRUE
cg08206047	-6.94111	6.47e-06	0.00620785	-0.131302	HYPO	chr10	72997755	+	UNC5B	UNC5B;UNC5B	II			NA	NA	NA	NA	NA	NA		OpenSea	NM_170744;NM_001244889	Body;Body														chr10:72997680-72997970	3
cg10236622	-6.93859	6.49e-06	0.00621404	-0.156339	HYPO	chr3	58546490	+			II			NA	NA	NA	NA	NA	NA		OpenSea																chr3:58546465-58546790	3
cg03287527	6.93744	6.5e-06	0.00621404	0.388707	HYPER	chr16	10843654	+	NUBP1	NUBP1	II			NA	NA	NA	NA	NA	NA		OpenSea	NM_002484	Body				TRUE				NUBP1	ENST00000571790.1	5'UTR	NUBP1;NUBP1	ENST00000571790.1;ENST00000574137.1	5'UTR;5'UTR	chr16:10842940-10843835	3						TRUE
cg03599037	6.93737	6.5e-06	0.00621404	0.0792232	HYPER	chr10	82172508	+	FAM213A	C10orf58;C10orf58	II			NA	NA	NA	NA	NA	NA	chr10:82168064-82168917	S_Shelf	NM_032333;NR_024572	5'UTR;TSS1500								FAM213A;FAM213A;FAM213A	ENST00000372188.1;ENST00000372187.5;ENST00000372185.1	5'UTR;5'UTR;5'UTR	FAM213A;FAM213A;FAM213A	ENST00000372188.1;ENST00000372187.5;ENST00000372185.1	5'UTR;5'UTR;5'UTR	chr10:82172360-82172735	3						TRUE
cg05496543	-6.93622	6.52e-06	0.00621404	-0.120009	HYPO	chr16	77467409	+	ADAMTS18,RP11-449J10.1	ADAMTS18	II			NA	NA	NA	NA	NA	NA	chr16:77468309-77469074	N_Shore	NM_199355	Body			RDMR					ADAMTS18;RP11-449J10.1	ENST00000567121.1;ENST00000564358.1	TSS1500;5'UTR	ADAMTS18;RP11-449J10.1;ADAMTS18	ENST00000567121.1;ENST00000564358.1;ENST00000564369.1	TSS1500;5'UTR;3'UTR								TRUE
cg11072113	6.93606	6.52e-06	0.00621404	0.143329	HYPER	chr11	61063124	+		VWCE	II			rs10897150	0.194093	NA	NA	NA	NA	chr11:61061751-61063063	S_Shore	NM_152718	TSS1500						11:61060933-61063337	Unclassified	VWCE	ENST00000335613.5	TSS1500	VWCE;VWCE;VWCE;VWCE	ENST00000538579.1;ENST00000301770.6;ENST00000535599.1;ENST00000335613.5	TSS1500;TSS1500;TSS1500;TSS1500	chr11:61063060-61063755	3					TRUE	TRUE
cg06658933	6.93591	6.52e-06	0.00621404	0.10795	HYPER	chr11	126030463	-			II			rs76005113	0.07404	NA	NA	NA	NA		OpenSea						TRUE				RP11-50B3.2	ENST00000532357.1	TSS200	RP11-50B3.2	ENST00000532357.1	TSS200	chr11:126030240-126030755	3
cg01007345	6.93248	6.56e-06	0.00622117	0.117388	HYPER	chr4	48271072	-	TEC	TEC	II			NA	NA	NA	NA	NA	NA	chr4:48271362-48271846	N_Shore	NM_003215	5'UTR						4:48270990-48272831	Promoter_Associated	TEC	ENST00000381501.3	5'UTR	TEC	ENST00000381501.3	5'UTR	chr4:48271025-48271215	3						TRUE
cg03830429	6.93044	6.58e-06	0.00622117	0.105186	HYPER	chr14	56049936	+	KTN1	KTN1;KTN1;KTN1;KTN1;KTN1;KTN1	II			NA	NA	NA	NA	NA	NA	chr14:56046634-56047986	S_Shore	NM_001271014;NM_001079521;NM_004986;NM_001079522;NR_073129;NR_073128	5'UTR;5'UTR;5'UTR;5'UTR;Body;Body								KTN1;KTN1;KTN1;KTN1	ENST00000395309.3;ENST00000438792.2;ENST00000395314.3;ENST00000395308.1	5'UTR;5'UTR;5'UTR;5'UTR	KTN1;KTN1;KTN1;KTN1;KTN1;KTN1;KTN1;KTN1	ENST00000557267.1;ENST00000395309.3;ENST00000555498.1;ENST00000438792.2;ENST00000395314.3;ENST00000459737.1;ENST00000395308.1;ENST00000554567.1	5'UTR;5'UTR;5'UTR;5'UTR;5'UTR;5'UTR;5'UTR;5'UTR			chr14:56049202-56050067	6
cg23928726	6.93041	6.58e-06	0.00622117	0.106087	HYPER	chr1	2344998	+	PEX10	PEX10;PEX10	II			NA	NA	NA	NA	NA	NA	chr1:2345891-2346156	N_Shore	NM_002617;NM_153818	TSS1500;TSS1500						1:2344997-2348677	Promoter_Associated	PEX10;PEX10;PEX10	ENST00000288774.3;ENST00000507596.1;ENST00000447513.2	TSS1500;TSS1500;TSS1500	PEX10;PEX10;PEX10;PEX10;PEX10;PEX10	ENST00000514502.1;ENST00000288774.3;ENST00000510434.1;ENST00000507596.1;ENST00000447513.2;ENST00000508384.1	TSS1500;TSS1500;TSS1500;TSS1500;TSS1500;3'UTR	chr1:2344620-2345090	3						TRUE
cg26128210	6.93025	6.58e-06	0.00622117	0.40805	HYPER	chr22	30647791	+			II			NA	NA	NA	NA	NA	NA		OpenSea				chr22:30647782-30647782									MTMR3	ENST00000464734.1	5'UTR	chr22:30647565-30648035	3
cg04549524	6.92945	6.59e-06	0.00622117	0.121182	HYPER	chr10	134511968	+	INPP5A	INPP5A	II			NA	NA	NA	NA	NA	NA		OpenSea	NM_005539	Body					10:134361709-134362559			INPP5A	ENST00000487614.1	5'UTR	INPP5A	ENST00000487614.1	5'UTR			chr10:134509442-134515595	6				TRUE
cg15391601	6.92855	6.6e-06	0.00622117	0.233701	HYPER	chr19	35849176	+		FFAR3	I	T	Red	rs58199607	0.036304	NA	NA	NA	NA		OpenSea	NM_005304	TSS1500						19:35849057-35849387	Unclassified_Cell_type_specific	FFAR3	ENST00000327809.3	TSS1500	FFAR3	ENST00000327809.3	TSS1500	chr19:35848840-35849475	3						TRUE
cg16533830	6.92703	6.61e-06	0.00622117	0.0973828	HYPER	chr3	9988662	-	PRRT3	PRRT3-AS1;PRRT3	II			NA	NA	NA	NA	NA	NA	chr3:9987895-9989619	Island	NR_046734;NM_207351	TSS1500;Body				TRUE	3:9962919-9964619	3:9987958-9988714	Unclassified_Cell_type_specific	PRRT3-AS1	ENST00000431558.1	TSS1500	PRRT3-AS1	ENST00000431558.1	TSS1500	chr3:9988505-9988815	3
cg11183371	-6.92666	6.62e-06	0.00622117	-0.440881	HYPO	chr20	18122894	+	PET117,CSRP2BP	CSRP2BP;PET117;CSRP2BP	II			NA	NA	NA	NA	NA	NA	chr20:18117962-18118989	S_Shelf	NM_020536;NM_001164811;NM_020536	5'UTR;Body;1stExon								CSRP2BP;CSRP2BP;CSRP2BP;CSRP2BP;CSRP2BP	ENST00000435364.2;ENST00000435364.2;ENST00000278816.2;ENST00000377681.2;ENST00000484001.1	5'UTR;1stExon;5'UTR;5'UTR;5'UTR	CSRP2BP;CSRP2BP;CSRP2BP;CSRP2BP;CSRP2BP;CSRP2BP;CSRP2BP;CSRP2BP	ENST00000435364.2;ENST00000435364.2;ENST00000278816.2;ENST00000377681.2;ENST00000464792.1;ENST00000489422.1;ENST00000484001.1;ENST00000492286.1	5'UTR;1stExon;5'UTR;5'UTR;5'UTR;5'UTR;5'UTR;5'UTR								TRUE
cg01672129	6.92659	6.62e-06	0.00622117	0.0689839	HYPER	chr14	103011800	+	CTD-2555C10.3		II			NA	NA	NA	NA	NA	NA	chr14:103010784-103011625	S_Shore						TRUE		14:103011049-103011804	Unclassified	CTD-2555C10.3;CTD-2555C10.3	ENST00000559946.1;ENST00000559946.1	1stExon;5'UTR	CTD-2555C10.3;CTD-2555C10.3	ENST00000559946.1;ENST00000559946.1	1stExon;5'UTR	chr14:103011680-103011835	3						TRUE
cg16525330	6.92631	6.62e-06	0.00622117	0.138861	HYPER	chr16	4292047	+	SRL	SRL	II			NA	NA	NA	NA	NA	NA		OpenSea	NM_001098814	1stExon								SRL;SRL	ENST00000330063.7;ENST00000399609.3	1stExon;1stExon	SRL;SRL	ENST00000572111.1;ENST00000399609.3	1stExon;1stExon								TRUE
cg26236741	6.92617	6.62e-06	0.00622117	0.149909	HYPER	chr10	130610237	+			II			NA	NA	NA	NA	NA	NA		OpenSea							10:130500227-130500457																TRUE
cg06169135	6.92615	6.62e-06	0.00622117	0.177499	HYPER	chr2	231825892	-			II			NA	NA	NA	NA	NA	NA		OpenSea										GPR55	ENST00000392039.2	TSS200	GPR55	ENST00000392039.2	TSS200	chr2:231825525-231826375	3
cg15815263	-6.91899	6.7e-06	0.006285	-0.137691	HYPO	chr3	178794563	+			II			NA	NA	NA	NA	NA	NA		OpenSea																		chr3:178794056-178794704	6	chr3:178794220-178795159	3
cg03976326	6.9183	6.71e-06	0.006285	0.30158	HYPER	chr7	4231054	-	SDK1	SDK1;SDK1	I	C	Grn	NA	NA	NA	NA	NA	NA		OpenSea	NR_027816;NM_152744	Body;Body				TRUE	7:4197408-4197581			SDK1	ENST00000446104.1	5'UTR	SDK1;SDK1	ENST00000446104.1;ENST00000476701.1	5'UTR;5'UTR	chr7:4230645-4231115	3						TRUE
cg22508999	6.91705	6.72e-06	0.00629014	0.106634	HYPER	chr17	77536741	-	RBFOX3		II			NA	NA	NA	NA	NA	NA		OpenSea							17:75048320-75048407			RBFOX3	ENST00000453134.2	5'UTR	RBFOX3	ENST00000453134.2	5'UTR	chr17:77536445-77536850	3						TRUE
cg22450406	6.91465	6.75e-06	0.00630425	0.16009	HYPER	chr2	235422165	+			II			NA	NA	NA	NA	NA	NA		OpenSea						TRUE										chr2:235421945-235422295	3						TRUE
cg14756006	-6.91417	6.75e-06	0.00630425	-0.204353	HYPO	chr6	94489271	-			II			NA	NA	NA	NA	NA	NA		OpenSea						TRUE										chr6:94489200-94489350	3						TRUE
cg10219850	-6.91305	6.76e-06	0.00630663	-0.281252	HYPO	chr1	215373449	-	KCNK2	KCNK2;KCNK2;KCNK2	II			NA	NA	NA	NA	NA	NA		OpenSea	NM_014217;NM_001017425;NM_001017424	Body;Body;Body				TRUE				KCNK2	ENST00000366948.3	3'UTR	KCNK2;KCNK2;KCNK2;KCNK2	ENST00000474771.1;ENST00000467031.1;ENST00000486921.1;ENST00000366948.3	3'UTR;3'UTR;3'UTR;3'UTR	chr1:215373080-215373470	3						TRUE
cg25037956	6.91245	6.77e-06	0.00630663	0.043504	HYPER	chr9	89348096	+			II			NA	NA	NA	NA	NA	NA		OpenSea																		chr9:89347317-89348649	5
cg02207086	-6.91044	6.79e-06	0.00631121	-0.337025	HYPO	chr4	186316100	-	LRP2BP		II			NA	NA	NA	NA	NA	NA	chr4:186317143-186318255	N_Shore										ANKRD37;LRP2BP;LRP2BP	ENST00000507479.1;ENST00000505916.1;ENST00000505916.1	TSS1500;1stExon;5'UTR	ANKRD37;ANKRD37;LRP2BP;LRP2BP	ENST00000507479.1;ENST00000507753.1;ENST00000505916.1;ENST00000505916.1	TSS1500;TSS1500;1stExon;5'UTR	chr4:186315760-186316210	3
cg20316713	6.90988	6.8e-06	0.00631121	0.148165	HYPER	chr11	66053304	-	YIF1A	YIF1A	II			NA	NA	NA	NA	NA	NA	chr11:66056209-66057324	N_Shelf	NM_020470	Body								YIF1A;YIF1A;YIF1A	ENST00000496746.1;ENST00000471387.2;ENST00000526497.1	TSS1500;5'UTR;TSS200	YIF1A;YIF1A;YIF1A;YIF1A;YIF1A;YIF1A	ENST00000484814.1;ENST00000496746.1;ENST00000485820.1;ENST00000471387.2;ENST00000526497.1;ENST00000494836.2	3'UTR;TSS1500;TSS200;5'UTR;TSS200;TSS1500			chr11:66052452-66053455	6	chr11:66051838-66053767	3		TRUE
cg17798847	6.90968	6.8e-06	0.00631121	0.187072	HYPER	chr13	30098432	+	SLC7A1	SLC7A1	II			rs76531030	0.02333	NA	NA	NA	NA		OpenSea	NM_003045	Body					13:28996242-28996443									chr13:30098380-30098610	3						TRUE
cg04940251	6.90904	6.81e-06	0.00631121	0.13914	HYPER	chr16	88935765	+			I	C	Grn	NA	NA	NA	NA	NA	NA	chr16:88937055-88937387	N_Shore							16:87463218-87463353	16:88935674-88935945	Unclassified_Cell_type_specific							chr16:88935525-88935875	3						TRUE
cg17025620	6.90575	6.84e-06	0.00632935	0.200453	HYPER	chr3	193587939	-			I	T	Red	rs73209272	0.055862	NA	NA	NA	NA	chr3:193587352-193587889	S_Shore						TRUE	3:195069841-195070840									chr3:193587520-193587955	3						TRUE
cg15260921	6.90494	6.85e-06	0.00632935	0.14137	HYPER	chr1	226308960	-			II			NA	NA	NA	NA	NA	NA	chr1:226308959-226310476	Island							1:224375564-224377088									chr1:226308860-226309195	3						TRUE
cg24435966	-6.90461	6.86e-06	0.00632935	-0.16667	HYPO	chr4	43342431	+			II			NA	NA	NA	NA	NA	NA		OpenSea						TRUE				RP11-1E6.1	ENST00000507388.1	TSS1500	RP11-1E6.1	ENST00000507388.1	TSS1500
cg12660093	6.90285	6.88e-06	0.00632935	0.0545816	HYPER	chr12	121077927	-	RP11-728G15.1	CABP1	II			rs76313965	0.010417	NA	NA	NA	NA	chr12:121078161-121079483	N_Shore	NM_001033677	TSS1500								RP11-728G15.1;RP11-728G15.1;RP11-728G15.1;CABP1	ENST00000544339.1;ENST00000544339.1;ENST00000540369.1;ENST00000316803.3	1stExon;3'UTR;3'UTR;TSS1500	RP11-728G15.1;RP11-728G15.1;RP11-728G15.1;CABP1	ENST00000544339.1;ENST00000544339.1;ENST00000540369.1;ENST00000316803.3	1stExon;3'UTR;3'UTR;TSS1500			chr12:121077429-121079898	6	chr12:121077610-121080304	6
cg19856613	6.90284	6.88e-06	0.00632935	0.116814	HYPER	chr1	205213060	+	TMCC2	TMCC2;TMCC2	II			NA	NA	NA	NA	NA	NA	chr1:205210695-205210918	S_Shelf	NM_014858;NM_001242925	Body;Body								TMCC2	ENST00000495538.1	5'UTR	TMCC2	ENST00000495538.1	5'UTR			chr1:205212870-205213831	6
cg24835939	-6.90076	6.9e-06	0.00632935	-0.0823865	HYPO	chr15	81460792	+	IL16		II			NA	NA	NA	NA	NA	NA		OpenSea													IL16	ENST00000560989.1	5'UTR					chr15:81458858-81461367	3
cg25782459	6.90061	6.9e-06	0.00632935	0.156832	HYPER	chr8	143379065	-	TSNARE1	TSNARE1;TSNARE1	II			NA	NA	NA	NA	NA	NA	chr8:143378961-143379278	Island	NM_145003;NM_001291931	Body;Body					8:143376952-143377185											chr8:143369187-143382694	6
cg26655077	6.90033	6.9e-06	0.00632935	0.0867232	HYPER	chr17	21227099	-			II			rs1625469	0.5	NA	NA	NA	NA		OpenSea							17:21167297-21167889	17:21226205-21227140	Promoter_Associated							chr17:21226585-21227155	3						TRUE
cg14143086	6.90024	6.9e-06	0.00632935	0.14723	HYPER	chr16	4292113	-		SRL	II			NA	NA	NA	NA	NA	NA		OpenSea	NM_001098814	TSS200								SRL;SRL	ENST00000330063.7;ENST00000399609.3	TSS200;TSS200	SRL;SRL	ENST00000572111.1;ENST00000399609.3	TSS200;TSS200
cg07845483	6.89899	6.92e-06	0.00632935	0.0586034	HYPER	chr19	10990043	+	CARM1	CARM1	II			NA	NA	NA	NA	NA	NA		OpenSea	NM_199141	Body						19:10989869-10990069	Unclassified_Cell_type_specific							chr19:10989780-10990255	3
cg18402325	6.89884	6.92e-06	0.00632935	0.314298	HYPER	chr12	129294960	-	SLC15A4	SLC15A4	II			NA	NA	NA	NA	NA	NA		OpenSea	NM_145648	Body								SLC15A4;SLC15A4	ENST00000544112.1;ENST00000539703.1	TSS200;3'UTR	SLC15A4;SLC15A4;SLC15A4;SLC15A4	ENST00000544112.1;ENST00000366292.2;ENST00000539703.1;ENST00000376740.4	TSS200;3'UTR;3'UTR;5'UTR	chr12:129294800-129295070	3
cg12267236	6.89828	6.93e-06	0.00632935	0.248699	HYPER	chr1	117527582	+	PTGFRN	PTGFRN	II			rs17579863	0.011737	NA	NA	NA	NA		OpenSea	NM_020440	Body														chr1:117527440-117527610	3						TRUE
cg18766900	-6.89774	6.93e-06	0.00632935	-0.242834	HYPO	chr10	11574616	-	USP6NL	USP6NL;USP6NL	II			NA	NA	NA	NA	NA	NA		OpenSea	NM_014688;NM_001080491	Body;TSS1500								USP6NL	ENST00000277575.5	TSS1500	USP6NL	ENST00000277575.5	TSS1500	chr10:11574320-11574650	3						TRUE
cg09101902	6.89655	6.95e-06	0.00633413	0.151379	HYPER	chr10	49863809	+	ARHGAP22		II			NA	NA	NA	NA	NA	NA	chr10:49863620-49864601	Island						TRUE	10:49533666-49534607						ARHGAP22;ARHGAP22	ENST00000460425.1;ENST00000460425.1	5'UTR;1stExon	chr10:49863520-49864590	3						TRUE
cg10559803	6.89419	6.97e-06	0.00635078	0.15944	HYPER	chr1	178693897	+	RP11-428K3.1	RALGPS2	II			NA	NA	NA	NA	NA	NA	chr1:178693968-178695075	N_Shore	NM_152663	TSS1500			RDMR		1:176960514-176962132			RALGPS2;RALGPS2;RALGPS2	ENST00000367635.3;ENST00000367634.2;ENST00000324778.4	TSS1500;TSS1500;TSS1500	RALGPS2;RALGPS2;RALGPS2	ENST00000495034.1;ENST00000367634.2;ENST00000324778.4	TSS1500;TSS1500;TSS1500	chr1:178693860-178694155	3					TRUE	TRUE
cg16966143	-6.88996	7.02e-06	0.00636202	-0.0757612	HYPO	chr1	210495145	-			II			NA	NA	NA	NA	NA	NA		OpenSea																chr1:210494960-210495175	3
cg21873954	6.88949	7.02e-06	0.00636202	0.0975702	HYPER	chr7	1782015	+	ELFN1	ELFN1-AS1;ELFN1-AS1;ELFN1-AS1;ELFN1	II			rs10281826	0.155993	NA	NA	NA	NA	chr7:1784027-1786934	N_Shelf	NR_120508;NR_120510;NR_120509;NM_001128636	TSS200;TSS200;TSS200;5'UTR					7:1748433-1748908	7:1781621-1783364	Unclassified_Cell_type_specific	AC074389.9;AC074389.9;ELFN1;ELFN1	ENST00000453348.1;ENST00000415399.1;ENST00000424383.2;ENST00000561626.1	TSS200;TSS200;5'UTR;5'UTR	AC074389.9;AC074389.9;ELFN1;ELFN1	ENST00000453348.1;ENST00000415399.1;ENST00000424383.2;ENST00000561626.1	TSS200;TSS200;5'UTR;5'UTR	chr7:1780825-1782435	3
cg04814966	6.88805	7.04e-06	0.00636202	0.203884	HYPER	chr10	81028199	+	ZMIZ1	ZMIZ1	II			NA	NA	NA	NA	NA	NA		OpenSea	NM_020338	Body		chr10:81027973-81027973									ZMIZ1	ENST00000472035.1	5'UTR	chr10:81028080-81028390	3
cg07896386	6.88757	7.05e-06	0.00636202	0.141333	HYPER	chr11	12088419	-			II			NA	NA	NA	NA	NA	NA		OpenSea										RP13-631K18.3	ENST00000476130.2	TSS200	RP13-631K18.3	ENST00000476130.2	TSS200	chr11:12088345-12089015	3
cg16120585	-6.8873	7.05e-06	0.00636202	-0.232794	HYPO	chr1	54415125	+	LRRC42	LRRC42	II			NA	NA	NA	NA	NA	NA	chr1:54411057-54411943	S_Shelf	NM_052940	5'UTR						1:54414596-54415445	Unclassified	LRRC42;LRRC42	ENST00000371370.3;ENST00000319223.4	5'UTR;5'UTR	LRRC42;LRRC42;LRRC42;LRRC42	ENST00000371370.3;ENST00000371368.1;ENST00000319223.4;ENST00000444987.1	5'UTR;5'UTR;5'UTR;5'UTR					chr1:54414438-54415589	6		TRUE
cg19151670	-6.88673	7.06e-06	0.00636202	-0.180914	HYPO	chr4	142201084	+			II			NA	NA	rs74332377	0.015103	NA	NA		OpenSea										RP11-586L23.1	ENST00000514347.1	TSS1500	RP11-586L23.1	ENST00000514347.1	TSS1500
cg15816959	6.88591	7.07e-06	0.00636202	0.212881	HYPER	chr14	97431088	-			II			NA	NA	NA	NA	NA	NA		OpenSea							14:96500816-96500954									chr14:97430845-97431295	3						TRUE
cg02225649	-6.88551	7.07e-06	0.00636202	-0.302889	HYPO	chr2	38999160	+	GEMIN6		II			NA	NA	NA	NA	NA	NA		OpenSea										GEMIN6	ENST00000409011.1	5'UTR	GEMIN6	ENST00000409011.1	5'UTR			chr2:38998820-38999220	5	chr2:38998801-38999350	6
cg15546236	-6.88444	7.08e-06	0.00636202	-0.178785	HYPO	chr13	25205286	-			II			NA	NA	NA	NA	NA	NA		OpenSea																chr13:25204980-25205390	3
cg09480446	-6.88393	7.09e-06	0.00636202	-0.160045	HYPO	chr7	107640935	-	LAMB1	LAMB1	II			NA	NA	NA	NA	NA	NA	chr7:107641795-107644058	N_Shore	NM_002291	Body								U3	ENST00000458938.1	TSS1500	U3	ENST00000458938.1	TSS1500	chr7:107640620-107640975	3						TRUE
cg12854656	6.88374	7.09e-06	0.00636202	0.079537	HYPER	chr5	131347999	+	AC034228.2	ACSL6;ACSL6	II			NA	NA	NA	NA	NA	NA	chr5:131346892-131347776	S_Shore	NM_015256;NM_001009185	TSS1500;TSS1500								AC034228.2;ACSL6;ACSL6;ACSL6;ACSL6;ACSL6;ACSL6;ACSL6;ACSL6	ENST00000432558.1;ENST00000296869.4;ENST00000379249.3;ENST00000379264.2;ENST00000543479.1;ENST00000379255.1;ENST00000544770.1;ENST00000477640.1;ENST00000379246.1	5'UTR;TSS1500;TSS1500;TSS1500;TSS1500;TSS1500;TSS1500;TSS200;TSS1500	AC034228.2;ACSL6;ACSL6;ACSL6;ACSL6;ACSL6;ACSL6;ACSL6;ACSL6;ACSL6;ACSL6;ACSL6	ENST00000432558.1;ENST00000296869.4;ENST00000379249.3;ENST00000379264.2;ENST00000469164.1;ENST00000543479.1;ENST00000379255.1;ENST00000430403.1;ENST00000544770.1;ENST00000414078.1;ENST00000477640.1;ENST00000379246.1	5'UTR;TSS1500;TSS1500;TSS1500;TSS1500;TSS1500;TSS1500;TSS1500;TSS1500;TSS200;TSS200;TSS1500	chr5:131347285-131348190	3						TRUE
cg09668022	-6.88285	7.1e-06	0.00636202	-0.250258	HYPO	chr16	89392503	+	ANKRD11	ANKRD11;ANKRD11;ANKRD11;ANKRD11	II			NA	NA	NA	NA	NA	NA		OpenSea	NR_045839;NM_013275;NM_001256183;NM_001256182	Body;5'UTR;5'UTR;5'UTR				TRUE		16:89392377-89392839	Unclassified	ANKRD11;ANKRD11;ANKRD11	ENST00000563291.1;ENST00000378330.2;ENST00000301030.4	5'UTR;5'UTR;5'UTR	ANKRD11;ANKRD11;ANKRD11;ANKRD11;ANKRD11;ANKRD11	ENST00000562816.1;ENST00000566858.1;ENST00000563291.1;ENST00000378330.2;ENST00000378332.2;ENST00000301030.4	3'UTR;3'UTR;5'UTR;5'UTR;5'UTR;5'UTR	chr16:89392165-89392815	3
cg04730413	6.88236	7.11e-06	0.00636202	0.0935179	HYPER	chr10	125853937	+		CHST15;CHST15	II			NA	NA	NA	NA	NA	NA	chr10:125851151-125853233	S_Shore	NM_001270765;NM_001270764	TSS1500;TSS1500					10:125843697-125843928			CHST15;CHST15;CHST15	ENST00000462406.1;ENST00000434607.2;ENST00000421115.1	TSS1500;TSS1500;TSS1500	CHST15;CHST15;CHST15	ENST00000462406.1;ENST00000434607.2;ENST00000421115.1	TSS1500;TSS1500;TSS1500	chr10:125853605-125854450	3
cg24238674	6.88206	7.11e-06	0.00636202	0.247601	HYPER	chr5	132561546	+	FSTL4	FSTL4	II			NA	NA	NA	NA	NA	NA		OpenSea	NM_015082	Body				TRUE				FSTL4	ENST00000507112.1	3'UTR	FSTL4;FSTL4;FSTL4	ENST00000509525.1;ENST00000509525.1;ENST00000507112.1	1stExon;3'UTR;3'UTR	chr5:132561385-132562035	3
cg23195903	6.88133	7.12e-06	0.00636202	0.0891722	HYPER	chr2	74968974	-			II			NA	NA	NA	NA	NA	NA		OpenSea				chr2:74968770-74968770												chr2:74968840-74969135	3
cg19308769	6.88109	7.12e-06	0.00636202	0.178662	HYPER	chr1	31289850	+			II			NA	NA	NA	NA	NA	NA		OpenSea						TRUE				RP5-1125N11.1	ENST00000440358.1	TSS1500	RP5-1125N11.1	ENST00000440358.1	TSS1500	chr1:31289445-31289875	3						TRUE
cg00317879	-6.88052	7.13e-06	0.00636202	-0.104362	HYPO	chr11	68920611	+	RP11-554A11.8		I	A	Red	NA	NA	NA	NA	NA	NA		OpenSea						TRUE	11:68677187-68677266			RP11-554A11.8	ENST00000562772.1	3'UTR	RP11-554A11.8	ENST00000562772.1	3'UTR	chr11:68920605-68920875	3						TRUE
cg06484854	6.87963	7.14e-06	0.00636202	0.222351	HYPER	chr1	3516471	+	MEGF6	MEGF6	II			NA	NA	NA	NA	NA	NA		OpenSea	NM_001409	Body														chr1:3516425-3516715	3
cg26148131	6.87876	7.15e-06	0.00636202	0.246688	HYPER	chr16	81684618	+	CMIP	CMIP;CMIP	II			NA	NA	NA	NA	NA	NA		OpenSea	NM_198390;NM_030629	Body;Body		chr16:81684511-81684511						CMIP;CMIP	ENST00000542097.1;ENST00000566513.1	5'UTR;5'UTR	CMIP;CMIP;CMIP;CMIP	ENST00000564666.1;ENST00000566462.1;ENST00000542097.1;ENST00000566513.1	5'UTR;TSS200;5'UTR;5'UTR					chr16:81684469-81687237	6
cg13603764	6.87836	7.15e-06	0.00636202	0.192829	HYPER	chr8	56598893	-			II			NA	NA	NA	NA	NA	NA		OpenSea						TRUE										chr8:56598800-56599050	3
cg09387528	-6.87769	7.16e-06	0.00636202	-0.0643481	HYPO	chr21	47876058	-			II			NA	NA	NA	NA	NA	NA	chr21:47878070-47879576	N_Shelf																chr21:47875460-47876195	3						TRUE
cg10971559	6.877	7.17e-06	0.00636202	0.205535	HYPER	chr10	23287284	-	ARMC3	ARMC3	I	C	Grn	NA	NA	NA	NA	NA	NA		OpenSea	NM_173081	Body					10:23327252-23327308									chr10:23287045-23287335	3						TRUE
cg01502872	6.87668	7.17e-06	0.00636202	0.155178	HYPER	chr6	33173119	+	HSD17B8	HSD17B8	I	C	Grn	rs137920002	0.010893	NA	NA	NA	NA	chr6:33172289-33172823	S_Shore	NM_014234	Body						6:33171945-33173651	Promoter_Associated	HSD17B8;HSD17B8	ENST00000469186.1;ENST00000374662.3	5'UTR;ExonBnd	HSD17B8;HSD17B8	ENST00000469186.1;ENST00000374662.3	5'UTR;ExonBnd	chr6:33172540-33173790	3						TRUE
cg20374435	6.87583	7.18e-06	0.0063635	0.130708	HYPER	chr5	180257691	+		HEIH;LINC00847;LINC00847;LINC00847	II			NA	NA	NA	NA	NA	NA	chr5:180258186-180258784	N_Shore	NR_045680;NR_045679;NR_045678;NR_027183	Body;TSS1500;TSS1500;TSS1500						5:180257593-180259057	Promoter_Associated	CTC-205M6.2	ENST00000501855.2	TSS1500	CTC-205M6.2;CTC-205M6.2;CTC-205M6.2;CTC-205M6.2;CTC-205M6.2	ENST00000501937.2;ENST00000501855.2;ENST00000502162.2;ENST00000508309.1;ENST00000509921.1	TSS1500;TSS1500;TSS1500;TSS1500;TSS1500	chr5:180257245-180257750	3
cg02155884	6.87513	7.19e-06	0.00636351	0.1843	HYPER	chr13	112715454	+			II			NA	NA	NA	NA	NA	NA	chr13:112715359-112716234	Island					DMR		13:111763239-111764301									chr13:112715345-112718295	3						TRUE
cg13056552	-6.87437	7.2e-06	0.00636408	-0.189603	HYPO	chr19	35896439	+	AC002511.1	LINC01531	II			rs4805125	0.101986	NA	NA	NA	NA		OpenSea	NR_040046	TSS200						19:35896219-35896572	Unclassified_Cell_type_specific	AC002511.1;AC002511.4	ENST00000441942.1;ENST00000536898.1	TSS1500;TSS200	AC002511.1;AC002511.4	ENST00000441942.1;ENST00000536898.1	TSS1500;TSS200	chr19:35896085-35896555	3
cg03835824	6.87367	7.21e-06	0.00636408	0.0640072	HYPER	chr15	90744010	+	SEMA4B	SEMA4B;SEMA4B	II			NA	NA	NA	NA	NA	NA	chr15:90744131-90745323	N_Shore	NM_198925;NM_020210	TSS1500;5'UTR						15:90743634-90745601	Promoter_Associated	SEMA4B;SEMA4B;SEMA4B	ENST00000411539.2;ENST00000379122.3;ENST00000332496.6	TSS1500;5'UTR;5'UTR	SEMA4B;SEMA4B;SEMA4B;SEMA4B;SEMA4B;SEMA4B;SEMA4B;SEMA4B;SEMA4B;SEMA4B	ENST00000559792.1;ENST00000411539.2;ENST00000560089.1;ENST00000558051.1;ENST00000559322.1;ENST00000559300.1;ENST00000379122.3;ENST00000561085.1;ENST00000332496.6;ENST00000558895.1	5'UTR;TSS1500;TSS1500;TSS1500;5'UTR;5'UTR;5'UTR;5'UTR;5'UTR;5'UTR	chr15:90743705-90744395	3						TRUE
cg15765936	6.86754	7.28e-06	0.00642007	0.145083	HYPER	chr14	96555905	-	C14orf132	C14orf132;C14orf132;C14orf132;C14orf132	II			NA	NA	NA	NA	NA	NA		OpenSea	NM_001289139;NM_001252507;NM_001282464;NM_001282463	3'UTR;3'UTR;3'UTR;3'UTR								C14orf132;C14orf132;C14orf132	ENST00000421193.3;ENST00000555004.1;ENST00000556728.1	TSS1500;5'UTR;5'UTR	C14orf132;C14orf132;C14orf132	ENST00000421193.3;ENST00000555004.1;ENST00000556728.1	TSS1500;5'UTR;5'UTR
cg25201036	6.86562	7.3e-06	0.0064285	0.212306	HYPER	chr6	158411724	-	SYNJ2	SYNJ2	II			NA	NA	NA	NA	NA	NA		OpenSea	NM_003898	Body						6:158411409-158412026	Promoter_Associated_Cell_type_specific							chr6:158411385-158411955	3
cg05894766	6.86522	7.31e-06	0.0064285	0.172405	HYPER	chr5	109024633	-		MAN2A1	II			NA	NA	NA	NA	NA	NA	chr5:109024965-109026701	N_Shore	NM_002372	TSS1500						5:109024293-109025210	Promoter_Associated	MAN2A1	ENST00000261483.4	TSS1500	MAN2A1	ENST00000261483.4	TSS1500	chr5:109024400-109025795	3
cg13782604	6.86464	7.31e-06	0.0064285	0.22613	HYPER	chr9	119809427	+	ASTN2	ASTN2	II			NA	NA	NA	NA	NA	NA		OpenSea	NM_014010	Body						9:119809240-119809533	Unclassified_Cell_type_specific	ASTN2	ENST00000361477.3	5'UTR	ASTN2	ENST00000361477.3	5'UTR	chr9:119809040-119809435	3
cg15580355	6.86334	7.33e-06	0.00643471	0.428264	HYPER	chr3	183003859	-	MCF2L2,B3GNT5	MCF2L2	II			rs11916792	0.032609	NA	NA	NA	NA		OpenSea	NM_015078	Body		chr3:183003579-183003579		TRUE		3:183003377-183004273	Promoter_Associated	B3GNT5	ENST00000462559.1	TSS1500	B3GNT5;MCF2L2;MCF2L2;B3GNT5	ENST00000462559.1;ENST00000475664.1;ENST00000488149.1;ENST00000480551.1	TSS1500;3'UTR;3'UTR;5'UTR	chr3:183003640-183003935	3						TRUE
cg09180433	-6.85936	7.37e-06	0.00645834	-0.154291	HYPO	chr10	112640035	+	PDCD4	PDCD4;PDCD4;PDCD4	II			NA	NA	NA	NA	NA	NA		OpenSea	NM_014456;NM_001199492;NM_145341	Body;Body;Body											PDCD4;PDCD4;PDCD4	ENST00000467574.1;ENST00000483670.1;ENST00000492932.1	5'UTR;5'UTR;TSS200					chr10:112638972-112640560	4
cg07054060	6.85927	7.38e-06	0.00645834	0.0875709	HYPER	chr14	105211068	+	ADSSL1	ADSSL1;ADSSL1	II			NA	NA	NA	NA	NA	NA		OpenSea	NM_152328;NM_199165	Body;Body								ADSSL1;ADSSL1;ADSSL1	ENST00000556623.1;ENST00000555674.1;ENST00000554657.1	TSS1500;TSS1500;TSS200	ADSSL1;ADSSL1;ADSSL1;ADSSL1;ADSSL1;ADSSL1;ADSSL1;ADSSL1;ADSSL1;ADSSL1	ENST00000557582.1;ENST00000553540.1;ENST00000553580.1;ENST00000555884.1;ENST00000555884.1;ENST00000556623.1;ENST00000555674.1;ENST00000554657.1;ENST00000557271.1;ENST00000557271.1	5'UTR;3'UTR;5'UTR;1stExon;5'UTR;TSS1500;TSS1500;TSS200;1stExon;5'UTR			chr14:105204639-105211609	6
cg13172020	6.85899	7.38e-06	0.00645834	0.347342	HYPER	chr5	59042366	-	PDE4D	PDE4D;PDE4D;PDE4D	II			NA	NA	NA	NA	NA	NA		OpenSea	NM_001197218;NM_001104631;NM_001165899	Body;Body;Body		chr5:59042319-59042319									PDE4D;PDE4D;PDE4D	ENST00000512069.2;ENST00000405053.3;ENST00000514231.1	3'UTR;3'UTR;3'UTR	chr5:59042040-59042530	3
cg23851167	6.8579	7.39e-06	0.00646244	0.193989	HYPER	chr20	62131189	+		EEF1A2	I	A	Red	NA	NA	NA	NA	NA	NA	chr20:62127243-62127735	S_Shelf	NM_001958	TSS1500					20:61600555-61601776			EEF1A2	ENST00000217182.3	TSS1500	EEF1A2	ENST00000217182.3	TSS1500	chr20:62130365-62131270	3						TRUE
cg10737521	6.85662	7.41e-06	0.00646665	0.328373	HYPER	chr5	179335243	-		TBC1D9B;TBC1D9B	I	C	Grn	NA	NA	NA	NA	NA	NA	chr5:179334344-179335115	S_Shore	NM_198868;NM_015043	TSS1500;TSS1500						5:179334011-179336228	Promoter_Associated	TBC1D9B;TBC1D9B	ENST00000355235.3;ENST00000356834.3	TSS1500;TSS1500	TBC1D9B;TBC1D9B;TBC1D9B	ENST00000522224.1;ENST00000355235.3;ENST00000356834.3	TSS1500;TSS1500;TSS1500	chr5:179333640-179335290	3					TRUE	TRUE
cg08195921	6.85612	7.41e-06	0.00646665	0.158252	HYPER	chr12	131701622	+			II			NA	NA	NA	NA	NA	NA		OpenSea							12:130267414-130267576									chr12:131701545-131701935	3						TRUE
cg20628743	6.85498	7.43e-06	0.00647131	0.215522	HYPER	chr1	3615715	+	TP73	TP73;TP73;TP73;TP73	I	A	Red	NA	NA	NA	NA	NA	NA		OpenSea	NM_001126240;NM_005427;NM_001126242;NM_001126241	Body;Body;Body;Body					1:3605550-3605623			TP73	ENST00000378290.4	5'UTR	TP73	ENST00000378290.4	5'UTR	chr1:3615365-3615935	3						TRUE
cg17365369	6.8522	7.46e-06	0.00649322	0.0832592	HYPER	chr19	52773256	+	ZNF766	ZNF766	II			NA	NA	NA	NA	NA	NA	chr19:52772706-52773257	Island	NM_001010851	Body					19:57464519-57465141	19:52772302-52773812	NonGene_Associated							chr19:52772945-52773955	3						TRUE
cg24965200	6.85105	7.47e-06	0.00649655	0.0991783	HYPER	chr1	54771989	-	SSBP3	SSBP3;SSBP3;SSBP3	II			NA	NA	NA	NA	NA	NA		OpenSea	NM_018070;NM_001009955;NM_145716	Body;Body;Body								SSBP3;SSBP3	ENST00000326956.6;ENST00000417664.2	3'UTR;5'UTR	SSBP3;SSBP3;SSBP3;SSBP3;SSBP3;SSBP3;SSBP3	ENST00000326956.6;ENST00000533946.1;ENST00000426150.1;ENST00000533209.1;ENST00000528787.1;ENST00000417664.2;ENST00000525990.1	3'UTR;3'UTR;3'UTR;3'UTR;3'UTR;5'UTR;5'UTR	chr1:54771685-54772195	3
cg13763232	6.85049	7.48e-06	0.00649655	0.136482	HYPER	chr3	14443428	-		SLC6A6;SLC6A6;SLC6A6	II			NA	NA	NA	NA	NA	NA	chr3:14443629-14444577	N_Shore	NM_003043;NM_001134368;NM_001134367	TSS1500;TSS1500;TSS1500					3:14418426-14418491	3:14443222-14445042	Promoter_Associated	SLC6A6;SLC6A6;SLC6A6;SLC6A6	ENST00000454876.2;ENST00000360861.3;ENST00000416216.2;ENST00000484191.1	TSS1500;TSS1500;TSS1500;TSS1500	SLC6A6;SLC6A6;SLC6A6;SLC6A6;SLC6A6;SLC6A6	ENST00000490683.1;ENST00000360861.3;ENST00000416216.2;ENST00000428884.2;ENST00000435095.1;ENST00000484191.1	TSS1500;TSS1500;TSS1500;TSS1500;TSS1500;TSS1500	chr3:14443185-14443715	3					TRUE	TRUE
cg13226907	6.84928	7.5e-06	0.00649655	0.0915715	HYPER	chr9	99383434	+		CDC14B;CDC14B	II			NA	NA	NA	NA	NA	NA	chr9:99380814-99382236	S_Shore	NM_003671;NM_033331	TSS1500;TSS1500			RDMR					CDC14B	ENST00000265659.2	TSS1500	CDC14B	ENST00000474602.1	TSS1500	chr9:99383080-99383595	3
cg24194943	-6.84913	7.5e-06	0.00649655	-0.232834	HYPO	chr15	96965463	+			II			NA	NA	NA	NA	NA	NA		OpenSea																chr15:96965425-96965690	3
cg26287163	6.84746	7.52e-06	0.00650686	0.0784197	HYPER	chr5	61032651	+	C5orf64	LOC100506526	II			NA	NA	NA	NA	NA	NA		OpenSea	NR_105000	TSS1500								CTD-2170G1.2;CTD-2170G1.2	ENST00000506550.1;ENST00000512882.2	TSS1500;TSS1500	CTD-2170G1.2;CTD-2170G1.2;C5orf64	ENST00000506550.1;ENST00000512882.2;ENST00000507461.1	TSS1500;TSS1500;5'UTR	chr5:61032565-61033075	3
cg13778201	6.84528	7.54e-06	0.00652264	0.317468	HYPER	chr15	91473365	+		UNC45A	I	A	Red	NA	NA	NA	NA	NA	NA	chr15:91473314-91473592	Island	NM_001039675	TSS200					15:89274295-89274503	15:91472810-91473699	Promoter_Associated	UNC45A	ENST00000394275.2	TSS200	UNC45A;UNC45A;UNC45A	ENST00000480470.1;ENST00000556319.1;ENST00000553358.1	TSS200;TSS200;5'UTR	chr15:91473020-91473590	3						TRUE
cg15883896	-6.84235	7.58e-06	0.00653544	-0.31169	HYPO	chr2	76015549	-			II			NA	NA	NA	NA	NA	NA		OpenSea																chr2:76015340-76015550	3
cg03704484	-6.8419	7.59e-06	0.00653544	-0.129069	HYPO	chr11	66027798	+	KLC2,RP11-755F10.3	KLC2;KLC2;KLC2;KLC2	II			NA	NA	NA	NA	NA	NA	chr11:66024910-66026253	S_Shore	NM_022822;NM_001134774;NM_001134776;NM_001134775	Body;Body;Body;Body								KLC2;RP11-755F10.3	ENST00000394065.2;ENST00000533576.1	TSS1500;3'UTR	KLC2;RP11-755F10.3	ENST00000394065.2;ENST00000533576.1	TSS1500;3'UTR			chr11:66027673-66027950	4	chr11:66023560-66028018	6
cg21044820	-6.84152	7.59e-06	0.00653544	-0.186132	HYPO	chr11	88030631	-	CTSC	CTSC	II			NA	NA	NA	NA	NA	NA		OpenSea	NM_001814	Body											CTSC;CTSC	ENST00000533897.1;ENST00000533897.1	3'UTR;1stExon					chr11:88030550-88031421	4
cg19864036	6.84103	7.6e-06	0.00653544	0.322991	HYPER	chr1	35543524	+	ZMYM1	ZMYM1	II			NA	NA	NA	NA	NA	NA	chr1:35544927-35545303	N_Shore	NM_024772	TSS1500								ZMYM1;ZMYM1;ZMYM1	ENST00000359858.4;ENST00000488455.1;ENST00000373329.1	TSS1500;TSS1500;TSS1500	ZMYM1;ZMYM1;ZMYM1;ZMYM1;ZMYM1	ENST00000359858.4;ENST00000466390.1;ENST00000488455.1;ENST00000475654.1;ENST00000417119.1	TSS1500;TSS1500;TSS1500;TSS1500;5'UTR								TRUE
cg03486281	-6.84066	7.6e-06	0.00653544	-0.279682	HYPO	chr20	59617991	-			II			NA	NA	NA	NA	NA	NA		OpenSea																				chr20:59617314-59618336	6
cg23659289	6.83948	7.62e-06	0.00654075	0.0848664	HYPER	chr17	43472725	-	ARHGAP27	ARHGAP27;ARHGAP27	I	A	Red	NA	NA	NA	NA	NA	NA	chr17:43472527-43474343	Island	NM_199282;NM_001159330	3'UTR;3'UTR				TRUE	17:40828323-40830126	17:43472209-43473058	Gene_Associated	ARHGAP27;ARHGAP27	ENST00000532038.1;ENST00000528384.1	3'UTR;3'UTR	ARHGAP27;ARHGAP27;ARHGAP27	ENST00000532038.1;ENST00000528384.1;ENST00000531735.1	3'UTR;3'UTR;3'UTR	chr17:43472520-43473315	3						TRUE
cg03627290	6.83773	7.64e-06	0.00654783	0.114033	HYPER	chr2	219155248	-	PNKD,TMBIM1	PNKD;TMBIM1	II			NA	NA	NA	NA	NA	NA	chr2:219156977-219157380	N_Shore	NM_015488;NM_022152	Body;5'UTR				TRUE		2:219155071-219155260	Unclassified_Cell_type_specific	PNKD;TMBIM1;TMBIM1;TMBIM1	ENST00000472650.1;ENST00000445635.1;ENST00000543441.1;ENST00000258412.3	5'UTR;5'UTR;5'UTR;5'UTR	TMBIM1;TMBIM1;PNKD;TMBIM1;TMBIM1;TMBIM1;TMBIM1;TMBIM1;TMBIM1;TMBIM1;TMBIM1;TMBIM1;TMBIM1;TMBIM1	ENST00000451181.1;ENST00000429501.1;ENST00000472650.1;ENST00000445635.1;ENST00000466012.1;ENST00000495113.1;ENST00000543441.1;ENST00000437694.2;ENST00000413976.1;ENST00000434015.1;ENST00000444183.1;ENST00000453281.1;ENST00000258412.3;ENST00000440422.1	TSS1500;TSS1500;5'UTR;5'UTR;3'UTR;3'UTR;5'UTR;5'UTR;5'UTR;5'UTR;5'UTR;5'UTR;5'UTR;5'UTR	chr2:219155225-219155475	3						TRUE
cg03663547	6.83737	7.64e-06	0.00654783	0.0894986	HYPER	chr1	8262519	+			II			NA	NA	NA	NA	NA	NA		OpenSea				chr1:8262223-8262223		TRUE										chr1:8262220-8262955	3
cg17370672	-6.83677	7.65e-06	0.00654783	-0.233443	HYPO	chr3	182924318	-	MCF2L2	MCF2L2	II			rs2103062	0.339273	NA	NA	NA	NA		OpenSea	NM_015078	Body								MCF2L2	ENST00000468976.1	3'UTR	MCF2L2;MCF2L2	ENST00000468976.1;ENST00000488149.1	3'UTR;3'UTR
cg10011655	6.8354	7.67e-06	0.00655523	0.134447	HYPER	chr17	74350966	+	PRPSAP1	PRPSAP1	II			NA	NA	NA	NA	NA	NA	chr17:74349151-74350656	S_Shore	NM_002766	TSS1500								PRPSAP1;PRPSAP1	ENST00000446526.2;ENST00000324684.4	TSS1500;TSS1500	PRPSAP1;PRPSAP1;PRPSAP1;PRPSAP1;PRPSAP1;PRPSAP1;PRPSAP1	ENST00000435555.1;ENST00000435555.1;ENST00000423915.1;ENST00000436498.1;ENST00000494662.1;ENST00000446526.2;ENST00000324684.4	1stExon;5'UTR;5'UTR;TSS1500;TSS1500;TSS1500;TSS1500	chr17:74350900-74351350	3
cg12188424	6.83368	7.69e-06	0.0065637	0.0525562	HYPER	chr15	72977813	-	HIGD2B	BBS4;BBS4;BBS4;BBS4;HIGD2B	II			NA	NA	NA	NA	NA	NA	chr15:72978290-72978758	N_Shore	NM_033028;NM_001252678;NR_045566;NR_045565;NR_002780	TSS1500;TSS1500;TSS1500;TSS1500;Body								BBS4;BBS4;BBS4;BBS4;BBS4;HIGD2B	ENST00000542334.1;ENST00000268057.4;ENST00000539603.1;ENST00000395205.2;ENST00000564239.1;ENST00000311755.3	TSS1500;TSS1500;TSS1500;TSS1500;TSS1500;5'UTR	BBS4;BBS4;BBS4;BBS4;BBS4;BBS4;BBS4;BBS4;BBS4;BBS4;HIGD2B	ENST00000542334.1;ENST00000268057.4;ENST00000565160.1;ENST00000561914.1;ENST00000563600.1;ENST00000562084.1;ENST00000569338.1;ENST00000566829.1;ENST00000395205.2;ENST00000564239.1;ENST00000311755.3	TSS1500;TSS1500;TSS1500;TSS1500;TSS1500;TSS1500;TSS1500;TSS1500;TSS1500;TSS1500;5'UTR	chr15:72977705-72978055	3
cg02909793	6.83325	7.69e-06	0.0065637	0.0977258	HYPER	chr20	56324509	+			II			rs11086619	0.06033	NA	NA	NA	NA	chr20:56323973-56324254	S_Shore																chr20:56323620-56324610	3						TRUE
cg18512628	6.83053	7.73e-06	0.00656973	0.200817	HYPER	chr6	124811541	-	NKAIN2	NKAIN2;NKAIN2;NKAIN2;NKAIN2;NKAIN2	II			NA	NA	NA	NA	NA	NA		OpenSea	NM_001040214;NM_153355;NM_001300737;NM_001300740;NM_001300738	Body;Body;Body;5'UTR;Body								NKAIN2;NKAIN2	ENST00000539866.1;ENST00000539866.1	ExonBnd;ExonBnd	NKAIN2;NKAIN2	ENST00000539866.1;ENST00000539866.1	ExonBnd;ExonBnd	chr6:124811300-124811670	3
cg11848254	6.83007	7.73e-06	0.00656973	0.154751	HYPER	chr7	134939464	+	STRA8	STRA8	II			NA	NA	NA	NA	NA	NA		OpenSea	NM_182489	Body				TRUE										chr7:134938725-134939575	3						TRUE
cg10259131	6.82869	7.75e-06	0.00656973	0.117383	HYPER	chr2	23928958	-	KLHL29	KLHL29	II			NA	NA	NA	NA	NA	NA		OpenSea	NM_052920	Body											KLHL29	ENST00000471654.1	5'UTR	chr2:23928705-23929575	3
cg14328601	6.82848	7.75e-06	0.00656973	0.188454	HYPER	chr9	140209339	-	EXD3	EXD3	I	C	Grn	NA	NA	NA	NA	NA	NA	chr9:140210552-140211065	N_Shore	NM_017820	Body					9:139328888-139329192	9:140208860-140209577	Unclassified_Cell_type_specific				EXD3;EXD3	ENST00000491734.2;ENST00000487745.1	3'UTR;3'UTR	chr9:140209245-140210555	3						TRUE
cg06921872	6.82817	7.76e-06	0.00656973	0.144642	HYPER	chr6	82957936	-		IBTK;IBTK	II			NA	NA	NA	NA	NA	NA	chr6:82957625-82957842	S_Shore	NM_015525;NM_001300906	TSS1500;TSS1500						6:82956608-82958158	Promoter_Associated	IBTK	ENST00000306270.7	TSS1500	IBTK;IBTK	ENST00000503400.1;ENST00000306270.7	TSS1500;TSS1500	chr6:82956585-82958615	3
cg09957626	-6.82756	7.76e-06	0.00656973	-0.224071	HYPO	chr20	17954321	+	OVOL2,MGME1	MGME1;MGME1;MGME1	II			rs117345580	0.023003	NA	NA	NA	NA		OpenSea	NM_052865;NM_001310338;NM_001310339	Body;Body;Body								C20orf72	ENST00000467391.1	5'UTR	OVOL2;C20orf72;C20orf72	ENST00000486776.1;ENST00000463219.1;ENST00000467391.1	3'UTR;5'UTR;5'UTR	chr20:17954080-17954530	3
cg00984709	-6.82708	7.77e-06	0.00656973	-0.100679	HYPO	chr2	203173065	-			II			NA	NA	NA	NA	NA	NA		OpenSea																				chr2:203167833-203174284	6
cg02972455	6.82689	7.77e-06	0.00656973	0.081759	HYPER	chr15	74902534	-	CLK3	CLK3	II			NA	NA	NA	NA	NA	NA		OpenSea	NM_003992	5'UTR								CLK3	ENST00000345005.4	5'UTR	CLK3	ENST00000345005.4	5'UTR			chr15:74901078-74903638	6	chr15:74902334-74903687	6
cg15694585	6.82664	7.78e-06	0.00656973	0.155497	HYPER	chr13	20703389	+			II			NA	NA	NA	NA	NA	NA	chr13:20701817-20702634	S_Shore							13:19601360-19601416													chr13:20700693-20703477	6		TRUE
cg14297867	-6.82469	7.8e-06	0.00658345	-0.268751	HYPO	chr9	27526172	-	MOB3B,IFNK	MOBKL2B;IFNK	II			rs41272885	0.0215	NA	NA	NA	NA	chr9:27528357-27528725	N_Shelf	NM_024761;NM_020124	5'UTR;3'UTR								MOB3B;IFNK	ENST00000262244.5;ENST00000276943.2	5'UTR;3'UTR	MOB3B;IFNK	ENST00000262244.5;ENST00000276943.2	5'UTR;3'UTR								TRUE
cg16170467	6.82356	7.81e-06	0.00658843	0.159941	HYPER	chr1	32408314	-	PTP4A2		II			NA	NA	NA	NA	NA	NA	chr1:32410188-32410630	N_Shore										PTP4A2	ENST00000526960.1	3'UTR	PTP4A2;PTP4A2	ENST00000468531.1;ENST00000526960.1	TSS200;3'UTR	chr1:32408005-32408430	3
cg11658968	-6.81875	7.88e-06	0.00663273	-0.266625	HYPO	chr16	8420802	-	RP11-568A19.1		II			NA	NA	NA	NA	NA	NA		OpenSea										RP11-568A19.1	ENST00000566236.1	5'UTR	RP11-568A19.1	ENST00000566236.1	5'UTR	chr16:8420680-8420935	3
cg20767288	6.81712	7.9e-06	0.00664312	0.0548988	HYPER	chr18	47390097	-	MYO5B	MYO5B	II			NA	NA	NA	NA	NA	NA		OpenSea	NM_001080467	Body				TRUE										chr18:47389925-47390155	3
cg09042678	6.81407	7.94e-06	0.00666892	0.139946	HYPER	chr20	18117663	-		PET117	II			NA	NA	NA	NA	NA	NA	chr20:18117962-18118989	N_Shore	NM_001164811	TSS1500								PET117;CSRP2BP;CSRP2BP	ENST00000432901.2;ENST00000377681.2;ENST00000484001.1	TSS1500;TSS1500;TSS1500	PET117;CSRP2BP;CSRP2BP;CSRP2BP;CSRP2BP	ENST00000432901.2;ENST00000377681.2;ENST00000464792.1;ENST00000489422.1;ENST00000492286.1	TSS1500;TSS1500;TSS1500;TSS1500;TSS1500	chr20:18117425-18117890	3						TRUE
cg16854097	6.81203	7.96e-06	0.00666927	0.06639	HYPER	chr16	81643846	-	CMIP	MIR6504;CMIP;CMIP	II			NA	NA	NA	NA	NA	NA		OpenSea	NR_106759;NM_198390;NM_030629	TSS1500;Body;Body				TRUE				CMIP	ENST00000566513.1	TSS200	CMIP	ENST00000565029.1	TSS200	chr16:81643760-81644030	3
cg09172991	6.81136	7.97e-06	0.00666927	0.03895	HYPER	chr2	69794389	-	AAK1	AAK1	II			rs4852283	0.420389	NA	NA	NA	NA		OpenSea	NM_014911	Body				TRUE							AAK1	ENST00000495836.1	3'UTR	chr2:69794320-69794695	3
cg08789713	-6.81077	7.98e-06	0.00666927	-0.0949941	HYPO	chr21	34544414	-			II			NA	NA	NA	NA	NA	NA		OpenSea										C21orf54	ENST00000440586.1	TSS1500	C21orf54	ENST00000440586.1	TSS1500	chr21:34544225-34544535	3
cg12550229	-6.81065	7.98e-06	0.00666927	-0.156586	HYPO	chr4	103531828	+	NFKB1	NFKB1;NFKB1	II			NA	NA	NA	NA	NA	NA		OpenSea	NM_003998;NM_001165412	Body;Body														chr4:103531725-103531915	3
cg05018974	6.80962	7.99e-06	0.00666927	0.119092	HYPER	chr19	3015439	+	TLE2	TLE2;TLE2;TLE2;TLE2	II			rs12984707	0.032352	NA	NA	NA	NA		OpenSea	NM_001144762;NM_003260;NM_001300846;NM_001144761	Body;Body;Body;Body								TLE2	ENST00000447365.2	5'UTR	TLE2	ENST00000447365.2	5'UTR	chr19:3015405-3015915	3
cg05410587	6.80937	8e-06	0.00666927	0.0394229	HYPER	chr4	1347008	+	UVSSA	KIAA1530	II			NA	NA	NA	NA	NA	NA		OpenSea	NM_020894	Body					4:1336896-1337167			KIAA1530	ENST00000296312.5	5'UTR	KIAA1530;KIAA1530	ENST00000505716.1;ENST00000296312.5	TSS1500;5'UTR	chr4:1346840-1347215	3						TRUE
cg15994482	-6.8093	8e-06	0.00666927	-0.293292	HYPO	chr10	107174084	+			II			NA	NA	NA	NA	NA	NA		OpenSea																				chr10:107173524-107174475	3
cg10651583	6.80875	8e-06	0.00666927	0.111042	HYPER	chr12	57941069	-	DCTN2	DCTN2	I	A	Red	NA	NA	NA	NA	NA	NA	chr12:57940563-57940981	S_Shore	NM_006400	TSS200					12:56226831-56227372	12:57939858-57941608	Promoter_Associated	DCTN2;DCTN2;DCTN2;DCTN2;DCTN2;DCTN2	ENST00000548249.1;ENST00000548249.1;ENST00000543105.1;ENST00000434715.3;ENST00000354743.5;ENST00000543672.1	1stExon;5'UTR;TSS200;TSS200;TSS200;TSS200	DCTN2;DCTN2;DCTN2;DCTN2;DCTN2;DCTN2;DCTN2;DCTN2;DCTN2;DCTN2;DCTN2;DCTN2;DCTN2;DCTN2;DCTN2	ENST00000548249.1;ENST00000548249.1;ENST00000543105.1;ENST00000550954.1;ENST00000434715.3;ENST00000552811.1;ENST00000550201.1;ENST00000549712.1;ENST00000546670.1;ENST00000547345.1;ENST00000546559.1;ENST00000354743.5;ENST00000547480.1;ENST00000543672.1;ENST00000550750.1	1stExon;5'UTR;TSS200;TSS200;TSS200;TSS200;TSS200;TSS200;TSS200;TSS200;TSS200;TSS200;TSS200;TSS200;TSS200	chr12:57940925-57941175	3						TRUE
cg15021029	-6.8072	8.02e-06	0.00667814	-0.0676842	HYPO	chr2	75933248	-	GCFC2	GCFC2;GCFC2;GCFC2	II			rs116739842	0.014757	NA	NA	NA	NA		OpenSea	NM_001201335;NM_001201334;NM_003203	Body;5'UTR;Body											GCFC2;GCFC2	ENST00000470503.1;ENST00000472230.1	3'UTR;3'UTR	chr2:75933100-75933395	3
cg24236938	6.80662	8.03e-06	0.00667814	0.129676	HYPER	chr6	43424191	-	DLK2	DLK2;DLK2	II			NA	NA	NA	NA	NA	NA	chr6:43422368-43423705	S_Shore	NM_206539;NM_023932	TSS1500;TSS1500								DLK2;DLK2;DLK2;DLK2	ENST00000357338.3;ENST00000372488.3;ENST00000357338.3;ENST00000372496.1	5'UTR;TSS1500;1stExon;TSS1500	DLK2;DLK2;DLK2;DLK2	ENST00000357338.3;ENST00000372485.1;ENST00000357338.3;ENST00000372496.1	5'UTR;TSS1500;1stExon;TSS1500	chr6:43424005-43424195	3					TRUE	TRUE
cg06616408	-6.80487	8.05e-06	0.00669005	-0.356894	HYPO	chr5	92926504	+	NR2F1	NR2F1;MIR548AO	II			NA	NA	NA	NA	NA	NA	chr5:92929268-92929489	N_Shelf	NM_005654;NR_049801	Body;Body								NR2F1	ENST00000506162.1	TSS1500	NR2F1	ENST00000506162.1	TSS1500	chr5:92926220-92926550	3
cg11216176	6.80039	8.11e-06	0.00672244	0.145932	HYPER	chr1	230493133	+	PGBD5	PGBD5	II			rs77462072	0.010055	NA	NA	NA	NA	chr1:230492716-230492945	S_Shore	NM_024554	Body					1:228559340-228560085			PGBD5	ENST00000391860.1	5'UTR	PGBD5	ENST00000391860.1	5'UTR			chr1:230492311-230493638	6				TRUE
cg13459852	6.80038	8.11e-06	0.00672244	0.121102	HYPER	chr2	74571248	+	RP11-287D1.3	SLC4A5	II			NA	NA	NA	NA	NA	NA		OpenSea	NM_133478	TSS1500								SLC4A5;SLC4A5	ENST00000394019.2;ENST00000377634.4	TSS1500;TSS1500	SLC4A5;SLC4A5;SLC4A5	ENST00000394019.2;ENST00000377634.4;ENST00000436454.1	TSS1500;TSS1500;TSS1500								TRUE
cg21180793	6.79993	8.12e-06	0.00672244	0.387619	HYPER	chr5	58096519	+	RAB3C,RP11-479O16.1	RAB3C	II			NA	NA	rs78686890	0.023121	rs78686890	0.023121		OpenSea	NM_138453	Body				TRUE				RP11-479O16.1	ENST00000509476.1	3'UTR	RAB3C;RP11-479O16.1	ENST00000381158.3;ENST00000509476.1	5'UTR;3'UTR								TRUE
cg06301744	6.79896	8.13e-06	0.00672588	0.121967	HYPER	chr2	240119884	-	HDAC4	HDAC4	II			NA	NA	NA	NA	NA	NA		OpenSea	NM_006037	Body								HDAC4	ENST00000456922.2	5'UTR	HDAC4;HDAC4;HDAC4;HDAC4;HDAC4	ENST00000463007.1;ENST00000493582.1;ENST00000535493.1;ENST00000456922.2;ENST00000496347.1	3'UTR;3'UTR;3'UTR;5'UTR;3'UTR	chr2:240119825-240120195	3
cg17598836	6.79777	8.15e-06	0.00672914	0.115575	HYPER	chr10	99612822	+	GOLGA7B	GOLGA7B	II			rs56089344	0.031277	NA	NA	NA	NA	chr10:99609425-99610116	S_Shelf	NM_001010917	Body																chr10:99612489-99613160	4
cg01541356	6.79736	8.15e-06	0.00672914	0.160045	HYPER	chr20	35050458	+	DLGAP4	DLGAP4	II			NA	NA	NA	NA	NA	NA		OpenSea	NM_014902	5'UTR								DLGAP4;DLGAP4;DLGAP4	ENST00000373913.3;ENST00000401952.2;ENST00000373907.2	5'UTR;5'UTR;5'UTR	DLGAP4;DLGAP4;DLGAP4	ENST00000373913.3;ENST00000401952.2;ENST00000373907.2	5'UTR;5'UTR;5'UTR	chr20:35050100-35050555	3
cg10712561	-6.79448	8.19e-06	0.0067536	-0.217285	HYPO	chr17	42392983	-	RUNDC3A	RUNDC3A;RUNDC3A;RUNDC3A	II			NA	NA	NA	NA	NA	NA	chr17:42392323-42393079	Island	NM_001144826;NM_001144825;NM_006695	Body;Body;Body			CDMR	TRUE	17:39747871-39748939			AC003102.3;RUNDC3A	ENST00000453562.1;ENST00000426726.2	TSS1500;ExonBnd	AC003102.3;RUNDC3A	ENST00000453562.1;ENST00000426726.2	TSS1500;ExonBnd	chr17:42392745-42393135	3						TRUE
cg26710563	6.79273	8.21e-06	0.00676555	0.0833791	HYPER	chr15	62684736	+	TLN2		II			NA	NA	NA	NA	NA	NA	chr15:62682502-62684396	S_Shore				chr15:62684510-62684510				15:62684645-62685103	Unclassified_Cell_type_specific				TLN2	ENST00000561322.1	5'UTR	chr15:62684605-62685115	3						TRUE
cg18828919	-6.79155	8.23e-06	0.00676555	-0.0738291	HYPO	chr1	245613972	+	KIF26B	KIF26B	II			rs4658775	0.255009	NA	NA	NA	NA		OpenSea	NM_018012	Body		chr1:245613844-245613844
cg12405991	6.79098	8.24e-06	0.00676555	0.135994	HYPER	chr3	10418634	+	ATP2B2	ATP2B2;ATP2B2	II			NA	NA	NA	NA	NA	NA		OpenSea	NM_001683;NM_001001331	Body;Body								ATP2B2	ENST00000429937.2	5'UTR	ATP2B2	ENST00000429937.2	5'UTR			chr3:10418418-10419090	4
cg16986622	6.79079	8.24e-06	0.00676555	0.087799	HYPER	chr22	38511524	+	PLA2G6	PLA2G6;PLA2G6;PLA2G6;PLA2G6;PLA2G6;PLA2G6	II			NA	NA	NA	NA	NA	NA		OpenSea	NM_001199562;NM_001004426;NM_003560;NM_001199562;NM_001004426;NM_003560	ExonBnd;ExonBnd;ExonBnd;Body;Body;Body						22:38509797-38511760	Unclassified	PLA2G6	ENST00000332509.3	ExonBnd	PLA2G6;PLA2G6	ENST00000496409.1;ENST00000332509.3	3'UTR;ExonBnd	chr22:38511365-38511795	3
cg05654832	6.78938	8.26e-06	0.00677146	0.0907586	HYPER	chr2	27301651	+	EMILIN1	EMILIN1;EMILIN1	II			NA	NA	NA	NA	NA	NA	chr2:27305312-27305612	N_Shelf	NM_007046;NM_007046	5'UTR;1stExon				TRUE	2:27155089-27155377			EMILIN1;EMILIN1;EMILIN1	ENST00000380320.4;ENST00000380320.4;ENST00000544143.1	5'UTR;1stExon;TSS200	EMILIN1;EMILIN1;EMILIN1	ENST00000380320.4;ENST00000380320.4;ENST00000544143.1	5'UTR;1stExon;TSS200	chr2:27301605-27301995	3
cg00138126	6.78896	8.27e-06	0.00677146	0.14027	HYPER	chr20	56286697	+		PMEPA1;PMEPA1;PMEPA1	II			NA	NA	NA	NA	NA	NA	chr20:56283891-56285395	S_Shore	NM_199169;NM_199170;NM_199171	TSS1500;TSS1500;TSS200								PMEPA1;PMEPA1;PMEPA1;PMEPA1	ENST00000395816.3;ENST00000347215.4;ENST00000265626.4;ENST00000472841.1	TSS1500;TSS1500;TSS200;TSS200	PMEPA1;PMEPA1;PMEPA1;PMEPA1	ENST00000395816.3;ENST00000347215.4;ENST00000265626.4;ENST00000472841.1	TSS1500;TSS1500;TSS200;TSS200	chr20:56285860-56286855	3					TRUE	TRUE
cg21073711	-6.78761	8.28e-06	0.00677592	-0.362661	HYPO	chr10	88062711	-	GRID1	GRID1	II			NA	NA	NA	NA	NA	NA		OpenSea	NM_017551	Body								AL732479.1	ENST00000459197.1	TSS200	AL732479.1	ENST00000459197.1	TSS200
cg14930341	6.78727	8.29e-06	0.00677592	0.257349	HYPER	chr6	43082234	-	PTK7	PTK7;PTK7;PTK7;PTK7;PTK7;PTK7;PTK7	II			NA	NA	NA	NA	NA	NA		OpenSea	NR_072998;NR_072997;NM_002821;NM_152882;NM_152881;NM_152880;NM_001270398	Body;Body;Body;Body;Body;Body;Body				TRUE				PTK7	ENST00000325774.5	5'UTR	PTK7;PTK7	ENST00000325774.5;ENST00000487673.1	5'UTR;5'UTR					chr6:43081318-43082736	6
cg25661892	6.78603	8.3e-06	0.00678249	0.139627	HYPER	chr6	40567317	+			II			NA	NA	NA	NA	NA	NA	chr6:40567266-40567580	Island							6:40675252-40675553													chr6:40566807-40567952	6		TRUE
cg21761355	6.78004	8.39e-06	0.00684167	0.144376	HYPER	chr12	131930674	-			II			NA	NA	NA	NA	NA	NA		OpenSea							12:130496627-130496715									chr12:131930605-131930875	3						TRUE
cg26154268	6.77775	8.42e-06	0.00685547	0.102558	HYPER	chr14	22538783	-			II			NA	NA	NA	NA	NA	NA		OpenSea										TRAV22	ENST00000390450.3	TSS200	TRAV22	ENST00000390450.3	TSS200	chr14:22538660-22538975	3						TRUE
cg07368443	6.77752	8.42e-06	0.00685547	0.0668271	HYPER	chr1	45265337	+		PLK3	II			NA	NA	NA	NA	NA	NA	chr1:45265534-45266783	N_Shore	NM_004073	TSS1500						1:45265254-45266847	Promoter_Associated	PLK3;PLK3;PLK3	ENST00000372201.4;ENST00000465443.1;ENST00000543983.1	TSS1500;TSS1500;TSS1500	PLK3;PLK3;PLK3	ENST00000372201.4;ENST00000465443.1;ENST00000543983.1	TSS1500;TSS1500;TSS1500			chr1:45265235-45266878	6	chr1:45265156-45266902	6		TRUE
cg07384107	6.77671	8.43e-06	0.0068562	0.100556	HYPER	chr12	52404880	+	GRASP	GRASP;GRASP	II			NA	NA	NA	NA	NA	NA	chr12:52400467-52401696	S_Shelf	NM_181711;NM_001271856	Body;5'UTR								GRASP;GRASP;GRASP	ENST00000552963.1;ENST00000552049.1;ENST00000380039.2	5'UTR;5'UTR;TSS200	GRASP;GRASP;GRASP;GRASP;GRASP;GRASP	ENST00000552963.1;ENST00000552049.1;ENST00000550809.1;ENST00000380039.2;ENST00000547749.1;ENST00000547749.1	5'UTR;5'UTR;5'UTR;TSS200;1stExon;5'UTR	chr12:52404845-52405375	3
cg05006639	-6.77618	8.44e-06	0.0068562	-0.188776	HYPO	chr6	123645159	+	TRDN	TRDN	II			NA	NA	NA	NA	NA	NA		OpenSea	NM_006073	Body																		chr6:123644503-123645462	6
cg09543151	6.77506	8.45e-06	0.00686153	0.130982	HYPER	chr13	110052929	-		LINC00399	II			NA	NA	NA	NA	NA	NA		OpenSea	NR_126361	TSS200								RP11-460H14.1	ENST00000439008.1	TSS200	RP11-460H14.1	ENST00000439008.1	TSS200	chr13:110052645-110052930	3
cg02980604	6.77369	8.47e-06	0.00686974	0.132008	HYPER	chr17	34058433	-		RASL10B	II			NA	NA	NA	NA	NA	NA	chr17:34058549-34058778	N_Shore	NM_033315	TSS1500						17:34058297-34059517	Unclassified_Cell_type_specific	RASL10B	ENST00000268864.2	TSS1500	RASL10B	ENST00000268864.2	TSS1500	chr17:34058245-34060235	3						TRUE
cg11793449	6.77211	8.49e-06	0.00687996	0.0606872	HYPER	chr17	76313872	+	AC061992.2		II			NA	NA	NA	NA	NA	NA	chr17:76309952-76310551	S_Shelf				chr17:76313584-76313584				17:76313702-76314033	Unclassified_Cell_type_specific							chr17:76313205-76314075	3						TRUE
cg16877097	-6.7715	8.5e-06	0.00687996	-0.323055	HYPO	chr12	45678469	-	ANO6	ANO6;ANO6;ANO6	II			NA	NA	NA	NA	NA	NA		OpenSea	NM_001025356;NM_001204803;NM_001142679	Body;Body;Body				TRUE				ANO6	ENST00000426898.2	5'UTR	ANO6;ANO6	ENST00000550630.1;ENST00000426898.2	3'UTR;5'UTR	chr12:45678240-45678630	3
cg07315622	6.77057	8.52e-06	0.00688326	0.0889767	HYPER	chr6	693488	-		EXOC2;EXOC2	II			rs13205146	0.259563	NA	NA	NA	NA	chr6:692464-693348	S_Shore	NM_018303;NR_073064	TSS1500;TSS1500						6:692239-693880	Promoter_Associated	EXOC2;EXOC2	ENST00000230449.4;ENST00000448181.3	TSS1500;TSS1500	EXOC2;EXOC2	ENST00000230449.4;ENST00000448181.3	TSS1500;TSS1500	chr6:693265-693795	3
cg04508575	-6.76761	8.56e-06	0.00690927	-0.291993	HYPO	chr5	31323107	-	CDH6	CDH6	II			NA	NA	NA	NA	NA	NA		OpenSea	NM_004932	Body					5:31358864-31359073																TRUE
cg15210526	-6.76594	8.58e-06	0.00692097	-0.352346	HYPO	chr1	167733310	-	MPZL1	MPZL1;MPZL1;MPZL1	II			NA	NA	NA	NA	NA	NA		OpenSea	NM_001146191;NM_003953;NM_024569	Body;Body;Body				TRUE							MPZL1;MPZL1;MPZL1;MPZL1	ENST00000474729.1;ENST00000367853.3;ENST00000464954.1;ENST00000465787.1	TSS1500;TSS1500;5'UTR;5'UTR	chr1:167733040-167733370	3						TRUE
cg01761595	6.7632	8.62e-06	0.00694473	0.17903	HYPER	chr8	9821723	-			II			rs563621	0.330682	NA	NA	NA	NA		OpenSea						TRUE										chr8:9821425-9821730	3						TRUE
cg24407833	6.762	8.64e-06	0.0069512	0.181663	HYPER	chr13	24040091	-			II			NA	NA	NA	NA	NA	NA	chr13:24040467-24041020	N_Shore								13:24040056-24041862	Promoter_Associated	LINC00327	ENST00000575689.1	TSS1500	LINC00327	ENST00000575689.1	TSS1500					chr13:24039608-24042081	6
cg20840783	6.76056	8.66e-06	0.00695255	0.418883	HYPER	chr6	138655440	+	KIAA1244	KIAA1244	II			NA	NA	NA	NA	NA	NA		OpenSea	NM_020340	Body					6:138697076-138697873	6:138655355-138655469	Unclassified_Cell_type_specific	KIAA1244	ENST00000367706.2	TSS200	KIAA1244	ENST00000367706.2	TSS200								TRUE
cg02761419	6.76007	8.66e-06	0.00695255	0.404593	HYPER	chr11	113237068	+	TTC12	TTC12	II			NA	NA	NA	NA	NA	NA		OpenSea	NM_017868	3'UTR								TTC12;TTC12	ENST00000483239.2;ENST00000529221.1	3'UTR;3'UTR	TTC12;TTC12;TTC12;TTC12;TTC12	ENST00000480233.1;ENST00000496311.1;ENST00000483239.2;ENST00000529221.1;ENST00000464224.1	5'UTR;5'UTR;3'UTR;3'UTR;3'UTR								TRUE
cg05272373	6.75998	8.66e-06	0.00695255	0.194646	HYPER	chr16	30194064	+		CORO1A;CORO1A	II			NA	NA	NA	NA	NA	NA	chr16:30194747-30195357	N_Shore	NM_007074;NM_001193333	TSS1500;TSS1500						16:30193973-30194112	Promoter_Associated	CORO1A;CORO1A;CORO1A	ENST00000219150.5;ENST00000566619.1;ENST00000565497.1	TSS1500;TSS1500;TSS1500	CORO1A;CORO1A;CORO1A;CORO1A;CORO1A;CORO1A;CORO1A;CORO1A;CORO1A;CORO1A;CORO1A	ENST00000561815.1;ENST00000219150.5;ENST00000564446.1;ENST00000568763.1;ENST00000566619.1;ENST00000569469.1;ENST00000565497.1;ENST00000570244.1;ENST00000569203.1;ENST00000563778.1;ENST00000561849.1	TSS1500;TSS1500;TSS1500;TSS1500;TSS1500;TSS1500;TSS1500;TSS1500;TSS1500;TSS200;TSS1500	chr16:30193940-30194475	3
cg02360676	6.75854	8.68e-06	0.00695997	0.0491639	HYPER	chr19	418205	-	SHC2	SHC2	II			rs10426188	0.074898	NA	NA	NA	NA	chr19:418898-419191	N_Shore	NM_012435	3'UTR				TRUE				SHC2	ENST00000264554.4	3'UTR	SHC2	ENST00000264554.4	3'UTR	chr19:417765-418215	3						TRUE
cg03700302	6.7565	8.71e-06	0.00695997	0.107703	HYPER	chr12	1948578	+	CACNA2D4	CACNA2D4	II			NA	NA	NA	NA	NA	NA		OpenSea	NM_172364	Body					12:1818615-1818955			CACNA2D4	ENST00000537784.1	5'UTR	CACNA2D4;CACNA2D4	ENST00000537784.1;ENST00000444595.2	5'UTR;3'UTR			chr12:1942758-1949221	6	chr12:1946734-1949586	6		TRUE
cg08399382	6.75619	8.72e-06	0.00695997	0.123712	HYPER	chr3	16215383	-		GALNT15	II			NA	NA	NA	NA	NA	NA		OpenSea	NM_054110	TSS1500								GALNTL2;GALNTL2	ENST00000339732.5;ENST00000437509.1	TSS1500;TSS1500	GALNTL2;GALNTL2	ENST00000339732.5;ENST00000437509.1	TSS1500;TSS1500	chr3:16215145-16215435	3
cg04495313	6.75619	8.72e-06	0.00695997	0.230546	HYPER	chr4	42348136	+	RP11-63A11.1		II			NA	NA	NA	NA	NA	NA		OpenSea							4:42042748-42043040			RP11-63A11.1;RP11-63A11.1	ENST00000503321.1;ENST00000508911.1	3'UTR;3'UTR	RP11-63A11.1;RP11-63A11.1	ENST00000503321.1;ENST00000508911.1	3'UTR;3'UTR								TRUE
cg18018385	-6.75618	8.72e-06	0.00695997	-0.121532	HYPO	chr10	101964284	-	CHUK	CHUK	II			NA	NA	NA	NA	NA	NA		OpenSea	NM_001278	Body														chr10:101964160-101964370	3
cg12078092	6.75442	8.74e-06	0.00697282	0.176431	HYPER	chr4	8378947	-	ACOX3	ACOX3;ACOX3	II			NA	NA	NA	NA	NA	NA	chr4:8376706-8376983	S_Shore	NM_001101667;NM_003501	Body;Body					4:8429798-8430197						ACOX3	ENST00000510365.1	3'UTR			chr4:8378016-8379745	6				TRUE
cg12201616	6.7532	8.76e-06	0.00697966	0.222207	HYPER	chr2	111920341	-	BCL2L11	BCL2L11;BCL2L11;BCL2L11;BCL2L11;BCL2L11;BCL2L11;BCL2L11;BCL2L11;BCL2L11;BCL2L11;BCL2L11;BCL2L11;BCL2L11;BCL2L11;BCL2L11;BCL2L11	II			NA	NA	NA	NA	NA	NA		OpenSea	NM_138627;NM_138626;NM_001204111;NM_006538;NM_001204106;NM_138621;NM_138625;NM_138624;NM_001204107;NM_207003;NM_138622;NM_138623;NM_001204109;NM_001204112;NM_001204108;NM_001204110	Body;Body;Body;Body;Body;Body;3'UTR;3'UTR;3'UTR;3'UTR;3'UTR;3'UTR;3'UTR;3'UTR;3'UTR;3'UTR											BCL2L11;BCL2L11;BCL2L11;BCL2L11;BCL2L11;BCL2L11	ENST00000361493.6;ENST00000431217.1;ENST00000439718.1;ENST00000433098.1;ENST00000415458.1;ENST00000452231.1	3'UTR;3'UTR;3'UTR;3'UTR;3'UTR;3'UTR	chr2:111920140-111920935	3
cg22452230	6.75183	8.78e-06	0.00698555	0.302829	HYPER	chr15	69754698	+			I	C	Grn	NA	NA	NA	NA	NA	NA		OpenSea							15:67541622-67541824	15:69754476-69755919	Promoter_Associated	RP11-279F6.1;RP11-279F6.1;RP11-253M7.4	ENST00000558633.1;ENST00000559025.1;ENST00000558702.1	TSS1500;TSS1500;TSS1500	RP11-279F6.1;RP11-279F6.1;RP11-253M7.4	ENST00000558633.1;ENST00000559025.1;ENST00000558702.1	TSS1500;TSS1500;TSS1500	chr15:69754440-69754795	3						TRUE
cg01229973	6.75143	8.79e-06	0.00698555	0.269998	HYPER	chr12	104136042	-	STAB2	STAB2	II			NA	NA	NA	NA	NA	NA		OpenSea	NM_017564	Body														chr12:104135945-104136255	3
cg22992161	-6.7499	8.81e-06	0.00698751	-0.37893	HYPO	chr2	58872456	+	LINC01122	LINC01122	II			NA	NA	NA	NA	NA	NA		OpenSea	NR_033873	Body								AC007092.1;AC007092.1;AC007092.1;AC007092.1;AC007092.1;AC007092.1	ENST00000427421.1;ENST00000422723.1;ENST00000455219.2;ENST00000429095.1;ENST00000452840.1;ENST00000449448.2	5'UTR;5'UTR;5'UTR;5'UTR;5'UTR;5'UTR	AC007092.1;AC007092.1;AC007092.1;AC007092.1;AC007092.1;AC007092.1	ENST00000427421.1;ENST00000422723.1;ENST00000455219.2;ENST00000429095.1;ENST00000452840.1;ENST00000449448.2	5'UTR;5'UTR;5'UTR;5'UTR;5'UTR;5'UTR			chr2:58871917-58872477	3	chr2:58871628-58872541	3
cg22549041	6.74976	8.81e-06	0.00698751	0.33858	HYPER	chr15	75019251	+		CYP1A1	I	C	Grn	rs3809585	0.016977	NA	NA	NA	NA	chr15:75018186-75019336	Island	NM_000499	TSS1500		chr15:75018665-75018665			15:72805240-72806509			CYP1A1;CYP1A1;CYP1A1;CYP1A1	ENST00000564596.1;ENST00000395049.4;ENST00000395048.2;ENST00000379727.3	TSS1500;TSS1500;TSS1500;TSS1500	CYP1A1;CYP1A1;CYP1A1;CYP1A1	ENST00000566503.1;ENST00000395049.4;ENST00000395048.2;ENST00000379727.3	TSS1500;TSS1500;TSS1500;TSS1500	chr15:75018705-75019735	3						TRUE
cg27462740	-6.74939	8.82e-06	0.00698751	-0.235867	HYPO	chr10	46077752	-	MARCH8	MARCH8	II			NA	NA	NA	NA	NA	NA		OpenSea	NM_145021	5'UTR								MARCH8	ENST00000395771.3	5'UTR	MARCH8	ENST00000395771.3	5'UTR			chr10:46077549-46078021	6	chr10:46075712-46078224	6
cg26230303	6.74643	8.86e-06	0.0070015	0.211195	HYPER	chr14	70279511	+			II			NA	NA	NA	NA	NA	NA		OpenSea																		chr14:70279468-70279827	6	chr14:70279484-70279941	6
cg22492099	6.74629	8.86e-06	0.0070015	0.116856	HYPER	chr15	43414974	+	EPB42		II			NA	NA	NA	NA	NA	NA		OpenSea					CDMR	TRUE		15:43414963-43415708	Unclassified				TMEM62;EPB42	ENST00000564698.1;ENST00000570199.1	TSS1500;3'UTR	chr15:43414805-43415195	3						TRUE
cg13301716	6.74617	8.86e-06	0.0070015	0.19047	HYPER	chr4	7965357	-			II			rs114000454	0.015204	NA	NA	NA	NA		OpenSea																chr4:7964905-7965395	3
cg06469542	6.74539	8.87e-06	0.0070015	0.115565	HYPER	chr14	77965869	-		ISM2;ISM2	II			NA	NA	NA	NA	NA	NA	chr14:77964571-77965670	S_Shore	NM_182509;NM_199296	TSS1500;TSS1500						14:77965693-77965917	Unclassified_Cell_type_specific	ISM2;ISM2;ISM2	ENST00000393684.3;ENST00000342219.4;ENST00000412904.1	TSS1500;TSS1500;TSS1500	ISM2;ISM2;ISM2;ISM2;ISM2;ISM2	ENST00000471734.1;ENST00000480979.1;ENST00000472744.1;ENST00000393684.3;ENST00000342219.4;ENST00000412904.1	TSS1500;TSS1500;TSS1500;TSS1500;TSS1500;TSS1500			chr14:77964148-77967002	6	chr14:77964247-77967781	6	TRUE	TRUE
cg05260915	6.74506	8.88e-06	0.0070015	0.110397	HYPER	chr1	235134117	-			II			NA	NA	NA	NA	NA	NA		OpenSea				chr1:235134086-235134086		TRUE										chr1:235133940-235134535	3
cg13962111	6.74403	8.89e-06	0.00700245	0.244171	HYPER	chr17	25574608	-			II			NA	NA	NA	NA	NA	NA		OpenSea																chr17:25574180-25575035	3
cg16842654	6.74363	8.9e-06	0.00700245	0.271169	HYPER	chr22	28643353	+	TTC28	TTC28	II			rs5762537	0.022319	NA	NA	NA	NA		OpenSea	NM_001145418	Body														chr22:28643140-28643430	3
cg01346767	6.74312	8.91e-06	0.00700245	0.0832437	HYPER	chr22	20779006	-	SCARF2	SCARF2;SCARF2	II			NA	NA	NA	NA	NA	NA	chr22:20779386-20780560	N_Shore	NM_153334;NM_182895	3'UTR;3'UTR					22:19108343-19109216	22:20778430-20779043	Unclassified_Cell_type_specific	SCARF2;SCARF2	ENST00000405555.3;ENST00000341328.4	3'UTR;3'UTR	SCARF2;SCARF2	ENST00000405555.3;ENST00000341328.4	3'UTR;3'UTR			chr22:20776444-20781019	6				TRUE
cg01379735	6.74208	8.92e-06	0.00700729	0.12136	HYPER	chr9	98734361	-	ERCC6L2	ERCC6L2	II			NA	NA	NA	NA	NA	NA		OpenSea	NM_020207	Body								C9orf102	ENST00000407474.3	TSS1500	C9orf102;C9orf102;C9orf102	ENST00000407474.3;ENST00000320486.5;ENST00000479391.1	TSS1500;TSS1500;5'UTR			chr9:98733198-98734630	3
cg16976478	6.74115	8.93e-06	0.00700767	0.231868	HYPER	chr2	237596473	+			II			NA	NA	NA	NA	NA	NA		OpenSea																chr2:237596300-237596655	3
cg11409923	6.74082	8.94e-06	0.00700767	0.129481	HYPER	chr17	1920299	-	RTN4RL1	RTN4RL1	II			NA	NA	NA	NA	NA	NA		OpenSea	NM_178568	Body								AC099684.1;AC099684.1	ENST00000572287.1;ENST00000425277.1	TSS1500;TSS1500	AC099684.1;AC099684.1	ENST00000572287.1;ENST00000425277.1	TSS1500;TSS1500			chr17:1919823-1924799	6
cg01998089	6.73926	8.96e-06	0.0070184	0.125719	HYPER	chr14	91205834	-	TTC7B	TTC7B	II			rs75263033	0.034309	NA	NA	NA	NA		OpenSea	NM_001010854	Body				TRUE				TTC7B	ENST00000540938.1	5'UTR	TTC7B	ENST00000540938.1	5'UTR	chr14:91205720-91205955	3						TRUE
cg11369748	-6.73507	9.02e-06	0.00705596	-0.234132	HYPO	chr7	70034947	+	AUTS2	AUTS2;AUTS2	II			NA	NA	NA	NA	NA	NA		OpenSea	NM_015570;NM_001127231	Body;Body																chr7:70034435-70035053	4	chr7:70033511-70035433	6
cg14562076	6.73476	9.03e-06	0.00705596	0.149227	HYPER	chr21	44869785	-	LINC00319	C21orf125	II			NA	NA	NA	NA	NA	NA		OpenSea	NR_026960	TSS200					21:43693938-43694886			LINC00319;LINC00319	ENST00000448049.1;ENST00000342757.2	5'UTR;TSS200	LINC00319;LINC00319	ENST00000448049.1;ENST00000342757.2	5'UTR;TSS200			chr21:44858893-44882405	6				TRUE
cg02245488	-6.73255	9.06e-06	0.00707438	-0.268666	HYPO	chr3	175449439	+	NAALADL2	NAALADL2	II			NA	NA	NA	NA	NA	NA		OpenSea	NM_207015	Body														chr3:175449405-175449610	3
cg17422445	-6.73148	9.08e-06	0.00707969	-0.207542	HYPO	chr20	15875775	-	MACROD2	LOC613266;LOC613266;MACROD2;MACROD2	II			NA	NA	NA	NA	NA	NA		OpenSea	NR_130925;NR_130924;NM_001033087;NM_080676	Body;Body;Body;Body																		chr20:15875676-15876858	6
cg06087623	6.72991	9.1e-06	0.00708702	0.208936	HYPER	chr1	2203012	+	SKI	SKI	I	A	Red	NA	NA	NA	NA	NA	NA		OpenSea	NM_003036	Body				TRUE	1:2192786-2192922			SKI	ENST00000478223.2	5'UTR	SKI;SKI	ENST00000508416.1;ENST00000478223.2	5'UTR;5'UTR	chr1:2202585-2203715	3						TRUE
cg26930078	6.72911	9.11e-06	0.00708702	0.109342	HYPER	chr17	42218924	-		C17orf53;C17orf53	II			NA	NA	NA	NA	NA	NA	chr17:42219153-42219616	N_Shore	NM_024032;NM_001171251	TSS1500;TSS1500						17:42218768-42219640	Promoter_Associated	C17orf53	ENST00000253405.8	TSS1500	C17orf53	ENST00000253405.8	TSS1500	chr17:42218760-42218930	3						TRUE
cg12826247	-6.72902	9.11e-06	0.00708702	-0.236152	HYPO	chr5	82262468	+			II			NA	NA	NA	NA	NA	NA		OpenSea						TRUE														chr5:82259681-82268416	6		TRUE
cg20705392	-6.72753	9.14e-06	0.00709412	-0.0596198	HYPO	chr17	9066278	+	NTN1	NTN1	II			NA	NA	NA	NA	NA	NA	chr17:9066152-9066388	Island	NM_004822	Body				TRUE	17:9006790-9007113						NTN1	ENST00000436734.1	1stExon			chr17:9065182-9066864	6	chr17:9065705-9066645	6		TRUE
cg09301254	6.72719	9.14e-06	0.00709412	0.0850082	HYPER	chr19	42348327	+	LYPD4	LYPD4;LYPD4;DMRTC2	I	C	Grn	rs183626723	0.0101	NA	NA	NA	NA	chr19:42348675-42348920	N_Shore	NM_173506;NM_173506;NM_001040283	1stExon;5'UTR;TSS1500					19:47040165-47041165			LYPD4;DMRTC2;LYPD4	ENST00000330743.3;ENST00000269945.2;ENST00000330743.3	5'UTR;TSS1500;1stExon	LYPD4;DMRTC2;LYPD4	ENST00000330743.3;ENST00000269945.2;ENST00000330743.3	5'UTR;TSS1500;1stExon								TRUE
cg02764883	6.72653	9.15e-06	0.00709465	0.0664106	HYPER	chr17	79195644	+	AZI1	CEP131;CEP131	II			NA	NA	NA	NA	NA	NA	chr17:79196345-79197419	N_Shore	NM_014984;NM_001009811	5'UTR;5'UTR								AZI1;AZI1;AZI1	ENST00000450824.2;ENST00000374782.3;ENST00000269392.4	5'UTR;5'UTR;5'UTR	AZI1;AZI1;AZI1	ENST00000450824.2;ENST00000374782.3;ENST00000269392.4	5'UTR;5'UTR;5'UTR	chr17:79195200-79196655	3
cg22390040	6.72482	9.18e-06	0.00710475	0.15926	HYPER	chr8	17220621	-	MTMR7	MTMR7	II			NA	NA	NA	NA	NA	NA		OpenSea	NM_004686	Body				TRUE										chr8:17220560-17220875	3						TRUE
cg19088141	6.72372	9.19e-06	0.00710475	0.178382	HYPER	chr1	113056151	-	WNT2B	WNT2B;WNT2B	II			NA	NA	NA	NA	NA	NA	chr1:113050813-113052301	S_Shelf	NM_024494;NM_004185	Body;Body								WNT2B;WNT2B	ENST00000478360.1;ENST00000256640.5	TSS1500;5'UTR	WNT2B;WNT2B	ENST00000478360.1;ENST00000256640.5	TSS1500;5'UTR	chr1:113055545-113056175	3						TRUE
cg18960629	6.72329	9.2e-06	0.00710475	0.136433	HYPER	chr17	36585452	+	ARHGAP23		II			NA	NA	NA	NA	NA	NA	chr17:36584420-36585453	Island				chr17:36585417-36585417												chr17:36584340-36586490	3						TRUE
cg15366536	6.72292	9.2e-06	0.00710475	0.0433098	HYPER	chr17	15170168	+		PMP22;PMP22;PMP22;PMP22	II			NA	NA	NA	NA	NA	NA	chr17:15165796-15166506	S_Shelf	NM_000304;NM_001281456;NR_104017;NR_104018	TSS1500;TSS1500;TSS1500;TSS1500														chr17:15170145-15170835	3
cg25069388	-6.72263	9.21e-06	0.00710475	-0.195895	HYPO	chr20	498006	-	CSNK2A1	CSNK2A1;CSNK2A1;CSNK2A1	II			NA	NA	NA	NA	NA	NA		OpenSea	NM_177560;NM_177559;NM_001895	5'UTR;5'UTR;5'UTR								CSNK2A1;CSNK2A1;CSNK2A1;CSNK2A1;CSNK2A1	ENST00000460062.1;ENST00000400217.1;ENST00000400227.3;ENST00000381973.4;ENST00000217244.3	3'UTR;5'UTR;5'UTR;5'UTR;5'UTR	CSNK2A1;CSNK2A1;CSNK2A1;CSNK2A1;CSNK2A1	ENST00000460062.1;ENST00000400217.1;ENST00000400227.3;ENST00000381973.4;ENST00000217244.3	3'UTR;5'UTR;5'UTR;5'UTR;5'UTR	chr20:497940-498230	3
cg00525373	6.72028	9.24e-06	0.00712083	0.173948	HYPER	chr11	113307871	-	DRD2	DRD2;DRD2	II			NA	NA	NA	NA	NA	NA		OpenSea	NM_000795;NM_016574	5'UTR;5'UTR								DRD2;DRD2;DRD2	ENST00000346454.3;ENST00000355319.2;ENST00000362072.3	5'UTR;5'UTR;5'UTR	DRD2;DRD2;DRD2;DRD2;DRD2	ENST00000540600.1;ENST00000543292.1;ENST00000346454.3;ENST00000355319.2;ENST00000362072.3	3'UTR;5'UTR;5'UTR;5'UTR;5'UTR	chr11:113307600-113308055	3
cg05726166	6.72004	9.25e-06	0.00712083	0.0721621	HYPER	chr15	70347634	-	TLE3	TLE3;TLE3;TLE3;TLE3;TLE3;TLE3;TLE3;TLE3;TLE3;TLE3;TLE3;TLE3;TLE3;TLE3	II			NA	NA	NA	NA	NA	NA		OpenSea	NM_005078;NM_001282982;NM_001282981;NM_001105192;NM_001282980;NM_001282979;NM_020908;NM_001282982;NM_001282981;NM_005078;NM_001105192;NM_001282980;NM_001282979;NM_020908	ExonBnd;ExonBnd;ExonBnd;ExonBnd;ExonBnd;ExonBnd;ExonBnd;Body;Body;Body;Body;Body;Body;Body								TLE3	ENST00000558939.1	ExonBnd	TLE3;TLE3;TLE3;TLE3	ENST00000557815.1;ENST00000542329.2;ENST00000557919.1;ENST00000558939.1	3'UTR;TSS200;ExonBnd;ExonBnd	chr15:70347245-70347635	3
cg20613872	6.7168	9.3e-06	0.00715162	0.0891541	HYPER	chr17	20205653	+	SPECC1,AC004702.2	SPECC1;SPECC1;SPECC1	II			NA	NA	NA	NA	NA	NA		OpenSea	NM_001033553;NM_001243439;NM_001033555	Body;Body;Body														chr17:20205405-20205890	3
cg15224638	-6.71566	9.31e-06	0.00715789	-0.139067	HYPO	chr2	120022563	+	STEAP3	STEAP3;STEAP3;STEAP3	II			NA	NA	NA	NA	NA	NA	chr2:120020675-120020970	S_Shore	NM_182915;NM_018234;NM_001008410	3'UTR;3'UTR;3'UTR						2:120022023-120023940	Unclassified	STEAP3;STEAP3;STEAP3	ENST00000354888.5;ENST00000393108.2;ENST00000546236.1	3'UTR;3'UTR;3'UTR	STEAP3;STEAP3;STEAP3	ENST00000354888.5;ENST00000393108.2;ENST00000546236.1	3'UTR;3'UTR;3'UTR	chr2:120022460-120022610	3
cg26384903	6.7137	9.34e-06	0.00717287	0.0705637	HYPER	chr19	8620744	-	MYO1F	MYO1F	I	C	Grn	rs73501543	0.073279	NA	NA	NA	NA	chr19:8620541-8620745	Island	NM_012335	Body														chr19:8620685-8620895	3						TRUE
cg11907477	6.71295	9.36e-06	0.00717287	0.355972	HYPER	chr6	156828989	+			II			NA	NA	NA	NA	NA	NA		OpenSea							6:156870681-156870842																TRUE
cg01909364	6.71258	9.36e-06	0.00717287	0.196779	HYPER	chr17	41739926	-		MEOX1;MEOX1;MEOX1	II			NA	NA	NA	NA	NA	NA		OpenSea	NM_013999;NM_001040002;NM_004527	TSS1500;TSS1500;TSS1500				TRUE		17:41739179-41740126	Unclassified_Cell_type_specific	MEOX1;MEOX1;MEOX1	ENST00000329168.3;ENST00000393661.2;ENST00000318579.4	TSS1500;TSS1500;TSS1500	MEOX1;MEOX1;MEOX1	ENST00000329168.3;ENST00000393661.2;ENST00000318579.4	TSS1500;TSS1500;TSS1500	chr17:41739800-41740115	3						TRUE
cg04065086	-6.70712	9.45e-06	0.00720263	-0.116036	HYPO	chr1	151104186	-	SEMA6C	SEMA6C	II			NA	NA	NA	NA	NA	NA	chr1:151103685-151106100	Island	NM_030913	3'UTR			RDMR			1:151103243-151104239	Unclassified_Cell_type_specific	RP11-68I18.10;SEMA6C;SEMA6C	ENST00000563624.1;ENST00000368913.3;ENST00000341697.3	TSS200;3'UTR;3'UTR	RP11-68I18.10;SEMA6C;SEMA6C	ENST00000563624.1;ENST00000368913.3;ENST00000341697.3	TSS200;3'UTR;3'UTR	chr1:151104020-151104375	3						TRUE
cg21169397	-6.70653	9.45e-06	0.00720263	-0.199504	HYPO	chr21	36626538	-	RUNX1		II			NA	NA	NA	NA	NA	NA		OpenSea						TRUE							RUNX1	ENST00000475045.1	3'UTR	chr21:36626385-36626970	3
cg07520443	6.70573	9.47e-06	0.00720263	0.220509	HYPER	chr9	79157535	-			II			rs61612745	0.070873	NA	NA	NA	NA		OpenSea																chr9:79157320-79157555	3
cg06224893	6.70551	9.47e-06	0.00720263	0.474342	HYPER	chr2	25526639	-	DNMT3A	DNMT3A;DNMT3A;DNMT3A	I	A	Red	rs34635462	0.302273	NA	NA	NA	NA		OpenSea	NM_022552;NM_175630;NM_175629	Body;Body;Body					2:25380136-25380257									chr2:25526620-25527095	3						TRUE
cg02703728	6.70534	9.47e-06	0.00720263	0.151656	HYPER	chr7	48127997	-		UPP1;UPP1	II			NA	NA	NA	NA	NA	NA	chr7:48128046-48128499	N_Shore	NM_181597;NM_003364	TSS1500;TSS1500								UPP1;UPP1;UPP1;UPP1;UPP1	ENST00000331803.4;ENST00000341253.4;ENST00000395564.4;ENST00000482015.1;ENST00000429491.2	TSS1500;TSS1500;TSS1500;TSS1500;TSS1500	UPP1;UPP1;UPP1;UPP1;UPP1;UPP1;UPP1;UPP1;UPP1;UPP1;UPP1	ENST00000416681.1;ENST00000331803.4;ENST00000432131.1;ENST00000457596.1;ENST00000341253.4;ENST00000421046.1;ENST00000395564.4;ENST00000436673.1;ENST00000444999.1;ENST00000482015.1;ENST00000429491.2	TSS1500;TSS1500;TSS1500;TSS1500;TSS1500;TSS1500;TSS1500;TSS1500;TSS1500;TSS1500;TSS1500	chr7:48127960-48128990	3						TRUE
cg08792976	6.70521	9.47e-06	0.00720263	0.141852	HYPER	chr16	760528	-			I	C	Grn	NA	NA	NA	NA	NA	NA	chr16:755037-756696	S_Shelf								16:760522-760917	Unclassified_Cell_type_specific	MSLN	ENST00000446427.2	5'UTR	MSLN	ENST00000446427.2	5'UTR			chr16:757804-762269	6				TRUE
cg27653740	-6.7051	9.48e-06	0.00720263	-0.363328	HYPO	chr12	93419005	-	RP11-511B23.2	LOC643339	II			NA	NA	NA	NA	NA	NA		OpenSea	NR_040096	Body						12:93418766-93419981	Unclassified	RP11-511B23.2;RP11-511B23.2	ENST00000550324.1;ENST00000549930.1	3'UTR;3'UTR	RP11-511B23.2;RP11-511B23.2	ENST00000550324.1;ENST00000549930.1	3'UTR;3'UTR					chr12:93418886-93419908	6
cg22681255	6.70489	9.48e-06	0.00720263	0.0784696	HYPER	chr12	52257417	-			II			NA	NA	NA	NA	NA	NA	chr12:52257744-52258128	N_Shore						TRUE										chr12:52257105-52260375	3						TRUE
cg08877322	6.70468	9.48e-06	0.00720263	0.156314	HYPER	chr3	156825813	+	LINC00880		II			NA	NA	NA	NA	NA	NA		OpenSea						TRUE				RP11-6F2.4	ENST00000471357.1	3'UTR	RP11-6F2.4	ENST00000471357.1	3'UTR	chr3:156825385-156825910	3						TRUE
cg04079260	6.70283	9.51e-06	0.00721608	0.10935	HYPER	chr18	42297128	-	SETBP1	SETBP1;SETBP1	II			NA	NA	NA	NA	NA	NA		OpenSea	NM_001130110;NM_015559	Body;Body																		chr18:42296660-42297143	3
cg26929272	6.70235	9.52e-06	0.00721608	0.251722	HYPER	chr10	88295210	-			I	T	Red	NA	NA	NA	NA	NA	NA	chr10:88295205-88295592	Island						TRUE	10:88285160-88285676									chr10:88294925-88295735	3						TRUE
cg22775831	6.69964	9.56e-06	0.00724114	0.0980741	HYPER	chr4	114730643	-			II			rs149342391	0.0261	NA	NA	NA	NA		OpenSea				chr4:114730352-114730352												chr4:114730505-114730735	3
cg22509138	6.69825	9.58e-06	0.00725062	0.384629	HYPER	chr20	44809026	-	CDH22	CDH22	II			NA	NA	NA	NA	NA	NA	chr20:44806599-44806875	S_Shelf	NM_021248	Body														chr20:44808325-44809035	3						TRUE
cg07311566	6.69744	9.6e-06	0.00725324	0.208568	HYPER	chr3	58632000	-	FAM3D	FAM3D	II			NA	NA	NA	NA	NA	NA		OpenSea	NM_138805	Body				TRUE																	TRUE
cg13491139	-6.696	9.62e-06	0.00726324	-0.312246	HYPO	chr9	139627019	+			I	A	Red	NA	NA	NA	NA	NA	NA	chr9:139622242-139623428	S_Shelf																		chr9:139626980-139627850	6				TRUE
cg12034869	6.69478	9.64e-06	0.00727084	0.237664	HYPER	chr15	92555243	-	SLCO3A1	SLCO3A1;SLCO3A1	II			NA	NA	NA	NA	NA	NA		OpenSea	NM_001145044;NM_013272	Body;Body				TRUE		15:92555104-92555435	Unclassified_Cell_type_specific	SLCO3A1	ENST00000555769.1	5'UTR	SLCO3A1;SLCO3A1	ENST00000553653.1;ENST00000555769.1	5'UTR;5'UTR	chr15:92554860-92555430	3						TRUE
cg07704716	6.69297	9.67e-06	0.00728528	0.25305	HYPER	chr6	2876762	+	RP11-420G6.4	SERPINB9P1	II			NA	NA	NA	NA	NA	NA	chr6:2875601-2875811	S_Shore	NR_033851	TSS200				TRUE		6:2875335-2877234	Promoter_Associated_Cell_type_specific	RP11-420G6.4	ENST00000420981.1	TSS200	RP11-420G6.4	ENST00000420981.1	TSS200	chr6:2876405-2877155	3
cg05340269	6.69153	9.69e-06	0.00729078	0.330559	HYPER	chr11	79032619	+	TENM4	ODZ4	II			NA	NA	NA	NA	NA	NA		OpenSea	NM_001098816	5'UTR				TRUE				ODZ4	ENST00000278550.7	5'UTR	ODZ4;ODZ4;ODZ4	ENST00000278550.7;ENST00000528688.1;ENST00000531583.1	5'UTR;3'UTR;3'UTR	chr11:79032345-79032675	3						TRUE
cg04880091	6.69094	9.7e-06	0.00729078	0.200135	HYPER	chr8	43132451	+			I	A	Red	NA	NA	NA	NA	NA	NA	chr8:43132045-43132478	Island							8:43250768-43251681									chr8:43132205-43132575	3						TRUE
cg16854606	6.69071	9.7e-06	0.00729078	0.182605	HYPER	chr19	13080743	-	DAND5	DAND5	II			NA	NA	NA	NA	NA	NA		OpenSea	NM_152654	1stExon								DAND5	ENST00000317060.1	1stExon	DAND5	ENST00000317060.1	1stExon	chr19:13080185-13080835	3					TRUE	TRUE
cg17339064	6.69016	9.71e-06	0.00729078	0.318178	HYPER	chr22	45960215	-	FBLN1	FBLN1;FBLN1	II			NA	NA	NA	NA	NA	NA		OpenSea	NM_006485;NM_006486	Body;Body														chr22:45960045-45960275	3
cg06906324	-6.68503	9.79e-06	0.00733906	-0.211591	HYPO	chr14	60033605	+	CCDC175	CCDC175	II			NA	NA	NA	NA	NA	NA		OpenSea	NM_001164399	Body														chr14:60033525-60033735	3
cg13204462	-6.68496	9.79e-06	0.00733906	-0.114181	HYPO	chr1	154716855	+	KCNN3	KCNN3;KCNN3	II			rs78651737	0.02699	NA	NA	NA	NA		OpenSea	NM_002249;NM_170782	Body;Body				TRUE																	TRUE
cg16974036	6.68166	9.85e-06	0.00736381	0.40242	HYPER	chr6	166992213	-	RPS6KA2	RPS6KA2;RPS6KA2	II			NA	NA	NA	NA	NA	NA		OpenSea	NM_021135;NM_001006932	Body;Body								RPS6KA2	ENST00000366863.2	5'UTR	RPS6KA2;RPS6KA2;RPS6KA2;RPS6KA2	ENST00000366863.2;ENST00000507350.1;ENST00000511034.1;ENST00000512860.1	5'UTR;5'UTR;5'UTR;5'UTR
cg22320179	6.68149	9.85e-06	0.00736381	0.0637757	HYPER	chr12	131732904	+			II			NA	NA	NA	NA	NA	NA		OpenSea																		chr12:131731994-131732912	6
cg24073975	6.68116	9.86e-06	0.00736381	0.127828	HYPER	chr19	1822214	-	REXO1,CTB-31O20.4	LOC100288123;REXO1	II			NA	NA	NA	NA	NA	NA	chr19:1822339-1822638	N_Shore	NR_034114;NM_020695	Body;Body					19:1772430-1773572			REXO1;REXO1	ENST00000543452.1;ENST00000413153.2	TSS200;3'UTR	REXO1;REXO1	ENST00000543452.1;ENST00000413153.2	TSS200;3'UTR	chr19:1821945-1822355	3
cg03488177	6.68012	9.87e-06	0.00736928	0.179726	HYPER	chr10	75648526	-			II			NA	NA	NA	NA	NA	NA		OpenSea																chr10:75648285-75648615	3
cg05947761	6.67796	9.91e-06	0.00738209	0.12591	HYPER	chr7	1734325	+	ELFN1		II			NA	NA	NA	NA	NA	NA		OpenSea						TRUE				AC074389.6;ELFN1	ENST00000382528.1;ENST00000424383.2	TSS1500;5'UTR	AC074389.6;ELFN1	ENST00000382528.1;ENST00000424383.2	TSS1500;5'UTR			chr7:1733664-1735052	6				TRUE
cg02479939	6.6779	9.91e-06	0.00738209	0.05531	HYPER	chr18	23805759	-		TAF4B;TAF4B;TAF4B	II			NA	NA	NA	NA	NA	NA	chr18:23806283-23807093	N_Shore	NM_001293725;NM_005640;NR_121653	TSS1500;TSS1500;TSS1500								TAF4B	ENST00000400466.2	TSS1500	TAF4B	ENST00000400466.2	TSS1500			chr18:23805491-23807329	6	chr18:23805391-23808772	6
cg06323153	-6.67595	9.94e-06	0.00739865	-0.192483	HYPO	chr7	12192371	-			II			rs1369492	0.321729	NA	NA	NA	NA		OpenSea																chr7:12192220-12192490	3
cg18091848	6.67463	9.96e-06	0.00740625	0.138511	HYPER	chr3	10236585	-	IRAK2	IRAK2	II			NA	NA	NA	NA	NA	NA		OpenSea	NM_001570	Body						3:10236028-10236942	Unclassified							chr3:10236060-10236750	3
cg03224396	-6.67404	9.97e-06	0.00740625	-0.142577	HYPO	chr1	221017300	+	HLA-AS1		II			rs75670844	0.020833	NA	NA	NA	NA		OpenSea						TRUE				HLA-AS1	ENST00000552026.1	3'UTR	HLA-AS1	ENST00000552026.1	3'UTR	chr1:221016760-221017355	3						TRUE
cg07591354	-6.6733	9.98e-06	0.00740625	-0.225323	HYPO	chr3	182923817	-	MCF2L2	MCF2L2	II			NA	NA	NA	NA	NA	NA		OpenSea	NM_015078	Body								MCF2L2	ENST00000468976.1	3'UTR	MCF2L2;MCF2L2	ENST00000468976.1;ENST00000488149.1	3'UTR;3'UTR
cg17818061	6.67287	9.99e-06	0.00740625	0.272158	HYPER	chr17	70293552	+			II			NA	NA	NA	NA	NA	NA		OpenSea						TRUE										chr17:70293540-70293810	3						TRUE
cg08239161	6.67243	1e-05	0.00740625	0.328457	HYPER	chr15	100017285	-			II			NA	NA	NA	NA	NA	NA		OpenSea						TRUE		15:100017203-100017857	Unclassified_Cell_type_specific	MEF2A	ENST00000453228.2	TSS200	MEF2A	ENST00000453228.2	TSS200	chr15:100016685-100017415	3
cg03689324	6.67133	1e-05	0.00740724	0.140525	HYPER	chr15	74426925	-	ISLR2	ISLR2;ISLR2;ISLR2;ISLR2	II			NA	NA	NA	NA	NA	NA	chr15:74425091-74428821	Island	NM_001130138;NM_020851;NM_001130136;NM_001130137	Body;Body;Body;Body					15:72211659-72214800	15:74426768-74427617	Unclassified	ISLR2	ENST00000561975.1	5'UTR	ISLR2	ENST00000561975.1	5'UTR	chr15:74426785-74427215	3						TRUE
cg20962532	-6.67119	1e-05	0.00740724	-0.153018	HYPO	chr11	128712462	+	KCNJ1	KCNJ1;KCNJ1;KCNJ1;KCNJ1;KCNJ1	II			rs148983839	0.011	NA	NA	NA	NA		OpenSea	NM_153765;NM_153766;NM_153764;NM_000220;NM_153767	5'UTR;5'UTR;5'UTR;TSS200;5'UTR								KCNJ1;KCNJ1;KCNJ1;KCNJ1	ENST00000392664.2;ENST00000392665.2;ENST00000440599.2;ENST00000392666.1	TSS200;5'UTR;5'UTR;5'UTR	KCNJ1;KCNJ1;KCNJ1;KCNJ1;KCNJ1;KCNJ1	ENST00000392664.2;ENST00000531562.1;ENST00000324003.3;ENST00000392665.2;ENST00000440599.2;ENST00000392666.1	TSS200;3'UTR;5'UTR;5'UTR;5'UTR;5'UTR	chr11:128712400-128712735	3						TRUE
cg15413523	6.67018	1e-05	0.00741248	0.0569956	HYPER	chr5	133451625	-	TCF7	TCF7;TCF7;TCF7;TCF7;TCF7;TCF7;TCF7;TCF7;TCF7;TCF7	II			NA	NA	NA	NA	NA	NA	chr5:133449320-133451260	S_Shore	NM_213648;NM_001134852;NM_201632;NM_201633;NM_001134851;NM_201634;NM_001134851;NM_003202;NM_213648;NM_001134852	5'UTR;1stExon;5'UTR;5'UTR;1stExon;5'UTR;5'UTR;Body;1stExon;5'UTR								TCF7;TCF7;TCF7;TCF7	ENST00000432532.2;ENST00000520958.1;ENST00000520958.1;ENST00000518915.1	5'UTR;5'UTR;1stExon;5'UTR	TCF7;TCF7;TCF7;TCF7;TCF7;TCF7;TCF7;TCF7;TCF7;TCF7;TCF7;TCF7;TCF7	ENST00000518887.1;ENST00000517851.1;ENST00000522375.1;ENST00000520958.1;ENST00000520958.1;ENST00000518915.1;ENST00000519447.1;ENST00000517741.1;ENST00000517741.1;ENST00000520652.1;ENST00000519165.1;ENST00000522653.1;ENST00000519165.1	5'UTR;5'UTR;5'UTR;5'UTR;1stExon;5'UTR;5'UTR;5'UTR;1stExon;TSS200;1stExon;5'UTR;5'UTR	chr5:133450545-133452855	3						TRUE
cg16698623	6.66812	1.01e-05	0.00742047	0.196175	HYPER	chr10	131412968	+	MGMT	MGMT	II			NA	NA	NA	NA	NA	NA		OpenSea	NM_002412	Body																				TRUE	TRUE
cg11377336	-6.66782	1.01e-05	0.00742047	-0.282026	HYPO	chr2	236721826	+	AGAP1	AGAP1;AGAP1	II			NA	NA	NA	NA	NA	NA		OpenSea	NM_014914;NM_001037131	Body;Body					2:236386508-236386566																TRUE
cg07973415	-6.6678	1.01e-05	0.00742047	-0.136388	HYPO	chr12	4385526	-	CCND2	CCND2-AS1;CCND2	II			NA	NA	NA	NA	NA	NA	chr12:4383193-4384405	S_Shore	NR_125790;NM_001759	TSS200;Body								RP11-264F23.4;RP11-264F23.3	ENST00000537370.1;ENST00000539135.1	TSS1500;TSS200	RP11-264F23.4;RP11-264F23.3	ENST00000537370.1;ENST00000539135.1	TSS1500;TSS200	chr12:4385200-4385595	3
cg04578677	6.66686	1.01e-05	0.00742488	0.144443	HYPER	chr11	67270800	-	PITPNM1	PITPNM1;PITPNM1	II			NA	NA	NA	NA	NA	NA	chr11:67271659-67272942	N_Shore	NM_001130848;NM_004910	Body;Body						11:67270610-67270953	Gene_Associated_Cell_type_specific				PITPNM1;PITPNM1	ENST00000529203.1;ENST00000527527.1	TSS1500;3'UTR			chr11:67270558-67274535	6				TRUE
cg14973995	6.66391	1.01e-05	0.00743929	0.0883386	HYPER	chr4	2935692	-	MFSD10	MFSD10;MFSD10;MFSD10	II			NA	NA	NA	NA	NA	NA	chr4:2935461-2936974	Island	NM_001146069;NM_001120;NM_001120	5'UTR;1stExon;5'UTR					4:2905307-2907099			MFSD10;MFSD10;MFSD10;MFSD10;MFSD10;MFSD10	ENST00000329687.4;ENST00000329687.4;ENST00000508221.1;ENST00000507555.1;ENST00000355443.4;ENST00000514800.1	1stExon;5'UTR;5'UTR;5'UTR;5'UTR;TSS200	MFSD10;MFSD10;NOP14-AS1;NOP14-AS1;MFSD10;MFSD10;MFSD10;MFSD10;MFSD10;MFSD10;MFSD10;MFSD10;MFSD10	ENST00000509676.1;ENST00000512781.1;ENST00000505731.1;ENST00000507999.1;ENST00000507272.1;ENST00000329687.4;ENST00000507272.1;ENST00000329687.4;ENST00000508221.1;ENST00000503596.1;ENST00000507555.1;ENST00000355443.4;ENST00000514800.1	3'UTR;TSS1500;TSS1500;TSS1500;1stExon;1stExon;5'UTR;5'UTR;5'UTR;5'UTR;5'UTR;5'UTR;TSS200			chr4:2930213-2939891	6	chr4:2930102-2950043	6	TRUE	TRUE
cg23411838	-6.66311	1.02e-05	0.00743929	-0.259475	HYPO	chr6	158252194	-	SNX9	SNX9	II			NA	NA	NA	NA	NA	NA		OpenSea	NM_016224	Body				TRUE				RP11-52J3.3	ENST00000411838.1	TSS1500	RP11-52J3.3	ENST00000411838.1	TSS1500	chr6:158252040-158252450	3
cg13083679	6.66263	1.02e-05	0.00743929	0.179205	HYPER	chr18	29262121	-	B4GALT6	B4GALT6	II			NA	NA	NA	NA	NA	NA	chr18:29264703-29265504	N_Shelf	NM_004775	Body																					TRUE
cg10901323	-6.6622	1.02e-05	0.00743929	-0.145163	HYPO	chr4	77519000	+	SHROOM3	SHROOM3	II			NA	NA	NA	NA	NA	NA		OpenSea	NM_020859	Body											SHROOM3;SHROOM3;SHROOM3;SHROOM3;SHROOM3	ENST00000490690.1;ENST00000485780.1;ENST00000497440.1;ENST00000469923.1;ENST00000481002.1	5'UTR;5'UTR;5'UTR;5'UTR;5'UTR	chr4:77518800-77519070	3
cg22483539	6.66208	1.02e-05	0.00743929	0.257623	HYPER	chr10	11667413	+			II			rs116435397	0.012598	NA	NA	NA	NA		OpenSea																		chr10:11667035-11667569	5	chr10:11666746-11667759	6
cg19746874	6.66131	1.02e-05	0.00743929	0.382741	HYPER	chr1	33841170	-	PHC2	PHC2;PHC2	I	A	Red	NA	NA	NA	NA	NA	NA		OpenSea	NM_198040;NM_198040	5'UTR;1stExon								PHC2;PHC2;PHC2;PHC2	ENST00000431992.1;ENST00000431992.1;ENST00000419414.2;ENST00000373416.1	1stExon;5'UTR;5'UTR;5'UTR	PHC2;PHC2;PHC2;PHC2;PHC2;PHC2	ENST00000431992.1;ENST00000431992.1;ENST00000468406.1;ENST00000484692.1;ENST00000419414.2;ENST00000373416.1	1stExon;5'UTR;3'UTR;3'UTR;5'UTR;5'UTR								TRUE
cg07570394	6.66129	1.02e-05	0.00743929	0.153609	HYPER	chr6	10310401	-			II			NA	NA	NA	NA	NA	NA		OpenSea						TRUE												chr6:10310176-10310481	4	chr6:10309282-10312015	6		TRUE
cg06585893	6.66011	1.02e-05	0.00743929	0.216888	HYPER	chr1	230883552	+	RP11-99J16__A.2,CAPN9	CAPN9;CAPN9	II			rs28359584	0.125826	NA	NA	NA	NA		OpenSea	NM_016452;NM_006615	Body;Body											RP11-99J16__A.2	ENST00000412344.1	3'UTR	chr1:230883225-230883570	3					TRUE	TRUE
cg02176858	-6.65918	1.02e-05	0.00743929	-0.306398	HYPO	chr2	122286796	-	CLASP1	CLASP1;CLASP1;CLASP1	II			rs8179877	0.061538	NA	NA	NA	NA	chr2:122287620-122288332	N_Shore	NM_001142273;NM_015282;NM_001142274	Body;Body;Body											CLASP1	ENST00000485112.1	3'UTR								TRUE
cg16978691	-6.65901	1.02e-05	0.00743929	-0.134741	HYPO	chr3	49950746	-	CTD-2330K9.3,MON1A	MON1A;MON1A	II			NA	NA	NA	NA	NA	NA	chr3:49947621-49948430	S_Shelf	NM_001142501;NM_032355	Body;Body								MON1A	ENST00000483022.1	3'UTR	MON1A;MON1A;MON1A;MON1A;MON1A	ENST00000486107.1;ENST00000484985.1;ENST00000483022.1;ENST00000493206.1;ENST00000473451.1	3'UTR;3'UTR;3'UTR;3'UTR;3'UTR	chr3:49950465-49950835	3
cg17057000	-6.65869	1.02e-05	0.00743929	-0.370039	HYPO	chr12	92763098	+			II			NA	NA	NA	NA	NA	NA		OpenSea																		chr12:92762648-92763270	4	chr12:92762828-92763857	6
cg15298486	6.65831	1.02e-05	0.00743929	0.116016	HYPER	chr10	102046690	+		BLOC1S2;BLOC1S2	II			NA	NA	NA	NA	NA	NA	chr10:102046142-102046632	S_Shore	NM_173809;NM_001001342	TSS1500;TSS1500						10:102045499-102047347	Promoter_Associated	BLOC1S2;BLOC1S2;BLOC1S2	ENST00000361832.1;ENST00000370372.1;ENST00000358848.1	TSS1500;TSS1500;TSS1500	BLOC1S2;BLOC1S2;BLOC1S2	ENST00000361832.1;ENST00000370372.1;ENST00000358848.1	TSS1500;TSS1500;TSS1500	chr10:102046360-102046895	3						TRUE
cg22871707	6.65814	1.02e-05	0.00743929	0.159002	HYPER	chr11	126297193	+	ST3GAL4,KIRREL3	KIRREL3;KIRREL3	II			NA	NA	NA	NA	NA	NA		OpenSea	NM_032531;NM_001301097	Body;Body											ST3GAL4	ENST00000524834.1	5'UTR	chr11:126296900-126297255	3
cg03793951	6.65771	1.02e-05	0.00743929	0.168118	HYPER	chr10	134856499	-			II			NA	NA	NA	NA	NA	NA	chr10:134853083-134853304	S_Shelf							10:134706468-134706527											chr10:134855572-134865213	6				TRUE
cg07269906	6.65712	1.03e-05	0.00743948	0.156116	HYPER	chr19	38480549	-	SIPA1L3	SIPA1L3	II			NA	NA	NA	NA	NA	NA		OpenSea	NM_015073	5'UTR				TRUE				SIPA1L3;SIPA1L3	ENST00000222345.5;ENST00000476317.1	5'UTR;5'UTR	SIPA1L3;SIPA1L3	ENST00000222345.5;ENST00000476317.1	5'UTR;5'UTR	chr19:38480545-38480895	3
cg26017408	6.65553	1.03e-05	0.00744161	0.17337	HYPER	chr10	116161327	-	AFAP1L2	AFAP1L2;AFAP1L2	II			NA	NA	NA	NA	NA	NA	chr10:116163391-116164599	N_Shelf	NM_032550;NM_001001936	Body;Body											AFAP1L2	ENST00000483496.1	3'UTR	chr10:116160925-116161495	3						TRUE
cg23463310	6.65479	1.03e-05	0.00744161	0.166459	HYPER	chr11	65188784	+		NEAT1	II			NA	NA	NA	NA	NA	NA	chr11:65189463-65190295	N_Shore	NR_028272	TSS1500			RDMR	TRUE		11:65188622-65191947	Promoter_Associated	NEAT1;NEAT1	ENST00000499732.1;ENST00000501122.2	TSS1500;TSS1500	NEAT1;NEAT1	ENST00000499732.1;ENST00000501122.2	TSS1500;TSS1500	chr11:65188480-65190015	3						TRUE
cg07541300	6.6545	1.03e-05	0.00744161	0.0983815	HYPER	chr12	131443383	+	GPR133	GPR133	II			NA	NA	NA	NA	NA	NA		OpenSea	NM_198827	Body					12:130009319-130009440						GPR133	ENST00000541143.1	5'UTR	chr12:131443280-131443675	3						TRUE
cg04192412	-6.65414	1.03e-05	0.00744161	-0.208601	HYPO	chr13	75980679	-	TBC1D4	TBC1D4	II			NA	NA	NA	NA	NA	NA		OpenSea	NM_014832	Body				TRUE				TBC1D4	ENST00000425511.1	5'UTR	TBC1D4	ENST00000425511.1	5'UTR								TRUE
cg06643156	-6.6537	1.03e-05	0.00744161	-0.231626	HYPO	chr3	58380774	+	PXK	PXK	II			NA	NA	NA	NA	NA	NA		OpenSea	NM_017771	Body				TRUE							PXK;PXK;PXK	ENST00000479134.1;ENST00000468776.1;ENST00000477308.1	TSS1500;3'UTR;3'UTR								TRUE
cg04221500	6.65343	1.03e-05	0.00744161	0.111146	HYPER	chr16	67562299	+	FAM65A	LOC100505942;FAM65A;FAM65A;FAM65A	II			NA	NA	NA	NA	NA	NA	chr16:67564058-67564332	N_Shore	NR_104656;NM_024519;NM_001193522;NM_001193523	Body;TSS1500;TSS1500;TSS1500								CTD-2012K14.1;CTD-2012K14.1;FAM65A;FAM65A;FAM65A;FAM65A;CTD-2012K14.1	ENST00000568833.1;ENST00000561577.1;ENST00000379312.3;ENST00000562597.1;ENST00000042381.4;ENST00000422602.2;ENST00000568833.1	3'UTR;3'UTR;TSS1500;TSS1500;TSS1500;TSS1500;1stExon	CTD-2012K14.1;CTD-2012K14.1;FAM65A;FAM65A;FAM65A;FAM65A;FAM65A;FAM65A;FAM65A;FAM65A;FAM65A;CTD-2012K14.1;FAM65A;FAM65A	ENST00000568833.1;ENST00000561577.1;ENST00000379312.3;ENST00000562597.1;ENST00000566522.1;ENST00000042381.4;ENST00000567050.1;ENST00000566907.1;ENST00000422602.2;ENST00000562755.1;ENST00000566920.1;ENST00000568833.1;ENST00000562116.1;ENST00000562755.1	3'UTR;3'UTR;TSS1500;TSS1500;TSS1500;TSS1500;TSS1500;TSS1500;TSS1500;1stExon;TSS1500;1stExon;5'UTR;5'UTR	chr16:67562240-67562875	3
cg13844402	6.65301	1.03e-05	0.00744161	0.138272	HYPER	chr13	112716025	+			II			NA	NA	NA	NA	NA	NA	chr13:112715359-112716234	Island							13:111763239-111764301									chr13:112715345-112718295	3						TRUE
cg12665192	6.65059	1.04e-05	0.00745765	0.116293	HYPER	chr2	239670571	-			II			NA	NA	NA	NA	NA	NA		OpenSea																chr2:239670480-239670815	3
cg05378690	-6.65057	1.04e-05	0.00745765	-0.13961	HYPO	chr3	48731511	+	IP6K2	IP6K2;IP6K2;IP6K2;IP6K2;IP6K2;IP6K2;IP6K2;IP6K2	II			NA	NA	NA	NA	NA	NA		OpenSea	NM_001005909;NM_016291;NM_001005911;NR_027437;NR_027438;NM_001146179;NM_001146178;NM_001005910	Body;Body;3'UTR;Body;Body;3'UTR;3'UTR;3'UTR								IP6K2;IP6K2;IP6K2;IP6K2;IP6K2;IP6K2;IP6K2	ENST00000340879.4;ENST00000432678.2;ENST00000431721.2;ENST00000449610.1;ENST00000413298.1;ENST00000450045.1;ENST00000446860.1	3'UTR;3'UTR;3'UTR;3'UTR;3'UTR;3'UTR;3'UTR	IP6K2;IP6K2;IP6K2;IP6K2;IP6K2;IP6K2;IP6K2;IP6K2;IP6K2;IP6K2;IP6K2	ENST00000479914.1;ENST00000340879.4;ENST00000432678.2;ENST00000433104.2;ENST00000416707.1;ENST00000431721.2;ENST00000491686.1;ENST00000449610.1;ENST00000413298.1;ENST00000450045.1;ENST00000446860.1	3'UTR;3'UTR;3'UTR;3'UTR;3'UTR;3'UTR;TSS1500;3'UTR;3'UTR;3'UTR;3'UTR					chr3:48731056-48733227	6		TRUE
cg12456778	-6.64965	1.04e-05	0.00746215	-0.155736	HYPO	chr5	143588059	+	KCTD16	KCTD16	II			NA	NA	NA	NA	NA	NA	chr5:143584743-143585064	S_Shelf	NM_020768	Body																					TRUE
cg08959204	6.64662	1.04e-05	0.00748483	0.189545	HYPER	chr16	68934075	+	TANGO6	TANGO6	II			NA	NA	NA	NA	NA	NA		OpenSea	NM_024562	Body											TMCO7;TMCO7	ENST00000562491.1;ENST00000565852.1	TSS200;5'UTR	chr16:68933765-68934150	3
cg13008631	6.64613	1.04e-05	0.00748483	0.107139	HYPER	chr2	227663034	+	IRS1	IRS1	I	A	Red	NA	NA	NA	NA	NA	NA	chr2:227662082-227664912	Island	NM_005544	1stExon			RDMR		2:227370118-227373198			IRS1	ENST00000305123.4	1stExon	IRS1	ENST00000305123.4	1stExon	chr2:227662645-227663855	3						TRUE
cg00846270	6.64612	1.04e-05	0.00748483	0.171103	HYPER	chr5	149688853	-	ARSI		II			NA	NA	NA	NA	NA	NA		OpenSea						TRUE							ARSI;ARSI	ENST00000509146.1;ENST00000515301.2	5'UTR;5'UTR	chr5:149688845-149689195	3
cg05714673	6.64517	1.05e-05	0.00748967	0.182426	HYPER	chr7	4167882	-	SDK1	SDK1;SDK1	II			NA	NA	NA	NA	NA	NA	chr7:4169481-4169753	N_Shore	NM_152744;NR_027816	Body;TSS1500								SDK1	ENST00000446104.1	5'UTR	SDK1;SDK1	ENST00000476701.1;ENST00000446104.1	TSS1500;5'UTR								TRUE
cg19287917	6.64129	1.05e-05	0.00752134	0.146141	HYPER	chr6	36269736	-	PNPLA1	PNPLA1;PNPLA1;PNPLA1	II			rs34598813	0.077032	NA	NA	NA	NA		OpenSea	NM_173676;NM_001145717;NM_001145716	Body;Body;Body				TRUE		6:36269505-36270663	Unclassified							chr6:36269545-36269830	3						TRUE
cg15579567	-6.64122	1.05e-05	0.00752134	-0.106099	HYPO	chr3	138952482	-	MRPS22	PISRT1	II			NA	NA	NA	NA	NA	NA		OpenSea	NR_027070	TSS200								MRPS22	ENST00000495075.1	5'UTR	MRPS22	ENST00000495075.1	5'UTR								TRUE
cg18423456	-6.64094	1.05e-05	0.00752134	-0.223431	HYPO	chr4	159817224	-	FNIP2,C4orf45	FNIP2;C4orf45	II			NA	NA	NA	NA	NA	NA		OpenSea	NM_020840;NM_152543	Body;Body								C4orf45	ENST00000508011.1	3'UTR	C4orf45	ENST00000508011.1	3'UTR			chr4:159817202-159817529	6	chr4:159816948-159817637	6
cg17082795	-6.64007	1.05e-05	0.00752523	-0.197934	HYPO	chr16	4039320	-	ADCY9	ADCY9	II			NA	NA	NA	NA	NA	NA		OpenSea	NM_001116	Body								ADCY9	ENST00000571889.1	3'UTR	ADCY9;ADCY9;ADCY9;ADCY9	ENST00000571467.1;ENST00000576936.1;ENST00000575550.1;ENST00000571889.1	3'UTR;TSS1500;3'UTR;3'UTR			chr16:4036908-4039397	6
cg13263397	6.63683	1.06e-05	0.00755675	0.0662961	HYPER	chr1	169078711	+	ATP1B1	ATP1B1	II			NA	NA	NA	NA	NA	NA	chr1:169074766-169076411	S_Shelf	NM_001677	Body				TRUE		1:169078062-169078841	Unclassified	ATP1B1;ATP1B1;ATP1B1	ENST00000499679.3;ENST00000367813.3;ENST00000494797.1	5'UTR;TSS1500;5'UTR	ATP1B1;ATP1B1;ATP1B1	ENST00000499679.3;ENST00000367813.3;ENST00000494797.1	5'UTR;TSS1500;5'UTR	chr1:169078520-169078830	3
cg04761094	6.63628	1.06e-05	0.00755675	0.123799	HYPER	chr19	42913736	+	LIPE-AS1,LIPE	LIPE	II			NA	NA	NA	NA	NA	NA	chr19:42914500-42914889	N_Shore	NM_005357	Body						19:42913615-42913762	Unclassified_Cell_type_specific							chr19:42913525-42914095	3						TRUE
cg04793813	6.63586	1.06e-05	0.00755675	0.116093	HYPER	chr16	56659964	+	MT1E	MT1E	II			NA	NA	NA	NA	NA	NA	chr16:56659107-56659660	S_Shore	NM_175617	Body				TRUE		16:56658962-56660177	Unclassified_Cell_type_specific							chr16:56659445-56660195	3						TRUE
cg00831909	6.63466	1.06e-05	0.0075603	0.146364	HYPER	chr1	13909623	-		PDPN;PDPN	I	C	Grn	NA	NA	NA	NA	NA	NA	chr1:13909606-13909842	Island	NM_006474;NM_198389	TSS1500;TSS1500					1:13782210-13782429			PDPN;PDPN;PDPN;PDPN;PDPN	ENST00000294489.6;ENST00000376057.4;ENST00000509009.1;ENST00000376061.4;ENST00000513143.1	TSS1500;TSS1500;TSS1500;TSS1500;TSS1500	PDPN;PDPN;PDPN;PDPN;PDPN;PDPN;PDPN	ENST00000294489.6;ENST00000376057.4;ENST00000506205.1;ENST00000510906.1;ENST00000509009.1;ENST00000376061.4;ENST00000513143.1	TSS1500;TSS1500;TSS1500;TSS1500;TSS1500;TSS1500;TSS1500	chr1:13909280-13909955	3						TRUE
cg10393540	6.63343	1.07e-05	0.0075603	0.220524	HYPER	chr17	60734594	+	MRC2	MRC2	II			NA	NA	NA	NA	NA	NA		OpenSea	NM_006039	Body																chr17:60734459-60735551	6
cg14073716	6.63311	1.07e-05	0.0075603	0.0869922	HYPER	chr11	62342730	-	MIR3654,TUT1	EEF1G;TUT1	II			NA	NA	NA	NA	NA	NA	chr11:62341228-62341695	S_Shore	NM_001404;NM_022830	TSS1500;Body			RDMR	TRUE		11:62340429-62342878	Promoter_Associated	EEF1G;EEF1G;EEF1G;EEF1G	ENST00000424909.2;ENST00000329251.4;ENST00000532986.1;ENST00000378019.3	TSS1500;TSS1500;TSS1500;TSS1500	MIR3654;EEF1G;EEF1G;EEF1G;EEF1G;TUT1;EEF1G;MIR3654	ENST00000534745.1;ENST00000525340.1;ENST00000424909.2;ENST00000329251.4;ENST00000532986.1;ENST00000469480.1;ENST00000378019.3;ENST00000526409.1	3'UTR;TSS1500;TSS1500;TSS1500;TSS1500;3'UTR;TSS1500;3'UTR	chr11:62341785-62342935	3						TRUE
cg08117110	6.63247	1.07e-05	0.0075603	0.213484	HYPER	chr15	81605232	+	STARD5	STARD5	II			NA	NA	NA	NA	NA	NA		OpenSea	NM_181900	3'UTR				TRUE				STARD5	ENST00000302824.6	3'UTR	STARD5;STARD5;STARD5	ENST00000302824.6;ENST00000560723.1;ENST00000325346.6	3'UTR;3'UTR;3'UTR			chr15:81605185-81606110	6	chr15:81582281-81606931	6		TRUE
cg19388739	6.63225	1.07e-05	0.0075603	0.0740575	HYPER	chr19	3581993	-			II			NA	NA	NA	NA	NA	NA	chr19:3585357-3585947	N_Shelf																							TRUE
cg06190555	-6.63179	1.07e-05	0.0075603	-0.183897	HYPO	chr9	134777001	-	MED27	MED27;MED27	II			NA	NA	NA	NA	NA	NA		OpenSea	NM_004269;NM_001253881	Body;Body														chr9:134776805-134777095	3
cg26394380	6.63172	1.07e-05	0.0075603	0.125857	HYPER	chr2	85896001	+		SFTPB;SFTPB	II			NA	NA	NA	NA	NA	NA		OpenSea	NM_000542;NM_198843	TSS1500;TSS1500				TRUE				SFTPB;SFTPB	ENST00000441838.2;ENST00000393822.3	TSS1500;TSS200	SFTPB;SFTPB;SFTPB;SFTPB	ENST00000428225.1;ENST00000519937.1;ENST00000441838.2;ENST00000393822.3	TSS1500;TSS1500;TSS1500;TSS200	chr2:85895365-85896235	3					TRUE	TRUE
cg11205173	-6.63097	1.07e-05	0.00756277	-0.394851	HYPO	chr4	1775077	-			I	A	Red	NA	NA	NA	NA	NA	NA	chr4:1772006-1772265	S_Shelf								4:1774570-1775219	Unclassified_Cell_type_specific							chr4:1774865-1775255	3						TRUE
cg25402408	6.62858	1.07e-05	0.00757584	0.169874	HYPER	chr1	18028182	+			II			rs115275745	0.045139	NA	NA	NA	NA		OpenSea																chr1:18027945-18028515	3
cg08359336	6.6283	1.07e-05	0.00757584	0.156687	HYPER	chr3	15374586	+	SH3BP5	SH3BP5;SH3BP5	II			NA	NA	NA	NA	NA	NA	chr3:15373314-15374209	S_Shore	NM_004844;NM_001018009	TSS1500;5'UTR						3:15372866-15374668	Promoter_Associated_Cell_type_specific	SH3BP5;SH3BP5;SH3BP5;SH3BP5;SH3BP5	ENST00000253688.5;ENST00000383791.3;ENST00000426925.1;ENST00000408919.3;ENST00000465894.2	TSS1500;TSS1500;5'UTR;5'UTR;3'UTR	SH3BP5;SH3BP5;SH3BP5;SH3BP5;SH3BP5;SH3BP5;SH3BP5;SH3BP5	ENST00000459627.1;ENST00000450625.1;ENST00000412806.1;ENST00000253688.5;ENST00000383791.3;ENST00000426925.1;ENST00000408919.3;ENST00000465894.2	TSS1500;TSS1500;TSS1500;TSS1500;TSS1500;5'UTR;5'UTR;3'UTR	chr3:15374000-15374670	3						TRUE
cg12279294	6.62827	1.07e-05	0.00757584	0.24121	HYPER	chr15	96877300	-	NR2F2	NR2F2;NR2F2;NR2F2;NR2F2	II			NA	NA	NA	NA	NA	NA	chr15:96873408-96877721	Island	NM_001145155;NM_021005;NM_001145156;NM_001145157	Body;Body;5'UTR;5'UTR			RDMR	TRUE	15:94677397-94678725			NR2F2;NR2F2;NR2F2	ENST00000394171.2;ENST00000453270.2;ENST00000421109.2	5'UTR;5'UTR;ExonBnd	NR2F2;NR2F2;NR2F2;NR2F2	ENST00000559679.1;ENST00000394171.2;ENST00000453270.2;ENST00000421109.2	5'UTR;5'UTR;5'UTR;ExonBnd	chr15:96876385-96877955	3						TRUE
cg11574055	6.62743	1.08e-05	0.0075795	0.263902	HYPER	chr1	117077116	-	CD58	CD58;CD58;CD58	I	C	Grn	NA	NA	NA	NA	NA	NA	chr1:117077042-117077299	Island	NM_001779;NR_026665;NM_001144822	Body;Body;Body					1:116878528-116878801			RP4-655J12.5	ENST00000439755.1	3'UTR	RP4-655J12.5	ENST00000439755.1	3'UTR	chr1:117076965-117077355	3						TRUE
cg06847188	6.62623	1.08e-05	0.00758771	0.08675	HYPER	chr3	129303314	+	PLXND1	PLXND1	II			NA	NA	NA	NA	NA	NA		OpenSea	NM_015103	Body	low-CpG:130785738-130786037															chr3:129300590-129309536	6				TRUE
cg15999590	6.62468	1.08e-05	0.00760021	0.0830784	HYPER	chr17	40718810	+		MLX;MLX;MLX	II			NA	NA	NA	NA	NA	NA	chr17:40718686-40719633	Island	NM_170607;NM_198204;NM_198205	TSS1500;TSS1500;TSS1500					17:37972242-37973136	17:40718443-40720042	Promoter_Associated	MLX	ENST00000246912.3	TSS1500	MLX	ENST00000246912.3	TSS1500			chr17:40718405-40720130	6	chr17:40716787-40720145	6		TRUE
cg07247998	6.62257	1.09e-05	0.007606	0.143784	HYPER	chr10	123778998	+	TACC2	TACC2;TACC2	II			NA	NA	NA	NA	NA	NA		OpenSea	NM_206862;NM_206861	5'UTR;5'UTR				TRUE	10:123768943-123769383			TACC2;TACC2	ENST00000369005.1;ENST00000515273.1	5'UTR;5'UTR	TACC2;TACC2;TACC2;TACC2;TACC2;TACC2	ENST00000489754.1;ENST00000492689.1;ENST00000369005.1;ENST00000515273.1;ENST00000498721.1;ENST00000474014.1	TSS1500;5'UTR;5'UTR;5'UTR;5'UTR;5'UTR	chr10:123778525-123779555	3						TRUE
cg15082473	6.62211	1.09e-05	0.007606	0.357769	HYPER	chr13	114801587	-	RASA3	RASA3	II			NA	NA	NA	NA	NA	NA	chr13:114803616-114803852	N_Shelf	NM_007368	Body					13:113819168-113819775											chr13:114800536-114802063	6	chr13:114801005-114801942	6		TRUE
cg11222127	6.62192	1.09e-05	0.007606	0.0603831	HYPER	chr12	113905210	+	LHX5	LHX5	II			NA	NA	NA	NA	NA	NA	chr12:113900750-113906442	Island	NM_022363	Body			DMR		12:112388998-112390782			LHX5	ENST00000261731.2	ExonBnd	LHX5	ENST00000261731.2	ExonBnd	chr12:113904785-113905655	3						TRUE
cg21234134	6.62114	1.09e-05	0.007606	0.0520142	HYPER	chr11	63997324	-	NUDT22,RP11-783K16.14	DNAJC4;DNAJC4;DNAJC4;NUDT22;NUDT22;NUDT22;NUDT22	II			NA	NA	NA	NA	NA	NA	chr11:63997662-63998412	N_Shore	NM_005528;NM_001307981;NM_001307980;NM_001271831;NM_001128613;NM_001128612;NM_032344	TSS1500;TSS1500;TSS1500;Body;Body;Body;Body								DNAJC4;DNAJC4;RP11-783K16.14;DNAJC4	ENST00000321685.3;ENST00000355040.4;ENST00000534988.1;ENST00000321460.5	TSS1500;TSS1500;3'UTR;TSS1500	DNAJC4;DNAJC4;NUDT22;DNAJC4;RP11-783K16.14;DNAJC4;NUDT22;NUDT22;NUDT22;NUDT22;NUDT22	ENST00000321685.3;ENST00000355040.4;ENST00000537094.1;ENST00000536006.1;ENST00000534988.1;ENST00000321460.5;ENST00000543501.1;ENST00000545184.1;ENST00000535000.1;ENST00000543358.1;ENST00000534929.1	TSS1500;TSS1500;5'UTR;TSS1500;3'UTR;TSS1500;5'UTR;5'UTR;3'UTR;3'UTR;ExonBnd			chr11:63997042-63998815	6	chr11:63996400-63998871	6
cg02974976	6.62083	1.09e-05	0.007606	0.224294	HYPER	chr1	117077219	-	CD58	CD58;CD58;CD58	II			NA	NA	NA	NA	NA	NA	chr1:117077042-117077299	Island	NM_001779;NR_026665;NM_001144822	Body;Body;Body					1:116878528-116878801			RP4-655J12.5	ENST00000439755.1	3'UTR	RP4-655J12.5	ENST00000439755.1	3'UTR	chr1:117076965-117077355	3						TRUE
cg23125970	6.62	1.09e-05	0.007606	0.22979	HYPER	chr13	110918441	+	COL4A1	COL4A1	II			NA	NA	NA	NA	NA	NA	chr13:110918324-110918725	Island	NM_001845	Body					13:109716165-109716768									chr13:110917740-110918455	3						TRUE
cg11436462	6.61927	1.09e-05	0.007606	0.104501	HYPER	chr6	5851031	-			II			NA	NA	NA	NA	NA	NA	chr6:5851610-5851841	N_Shore						TRUE				RP3-380B8.4	ENST00000454882.1	TSS1500	RP3-380B8.4	ENST00000454882.1	TSS1500	chr6:5850905-5851755	3						TRUE
cg21084508	6.61894	1.09e-05	0.007606	0.0706154	HYPER	chr2	219905564	-	CCDC108	CCDC108;CCDC108	II			NA	NA	NA	NA	NA	NA	chr2:219906107-219906328	N_Shore	NM_152389;NM_194302	5'UTR;5'UTR								CCDC108;CCDC108;CCDC108;CCDC108;CCDC108	ENST00000545086.1;ENST00000441164.2;ENST00000410037.1;ENST00000295729.2;ENST00000341552.5	5'UTR;5'UTR;5'UTR;5'UTR;5'UTR	CCDC108;CCDC108;CCDC108;CCDC108;CCDC108;CCDC108;CCDC108	ENST00000462848.1;ENST00000545086.1;ENST00000441164.2;ENST00000458526.1;ENST00000410037.1;ENST00000295729.2;ENST00000341552.5	3'UTR;5'UTR;5'UTR;5'UTR;5'UTR;5'UTR;5'UTR								TRUE
cg26369047	6.6188	1.09e-05	0.007606	0.25061	HYPER	chr3	38995199	+		SCN11A	II			rs61732226	0.012367	NA	NA	NA	NA		OpenSea	NM_001287223	TSS200
cg19416832	-6.61879	1.09e-05	0.007606	-0.170544	HYPO	chr11	12271422	-	MICAL2	MICAL2;MICAL2;MICAL2;MICAL2;MICAL2;MICAL2	II			NA	NA	NA	NA	NA	NA		OpenSea	NM_014632;NM_001282664;NM_001282665;NM_001282663;NM_001282666;NM_001282667	Body;Body;Body;Body;Body;Body											MICAL2;MICAL2;MICAL2;MICAL2;MICAL2;MICAL2	ENST00000526672.1;ENST00000530691.1;ENST00000525075.1;ENST00000534563.1;ENST00000525979.1;ENST00000528931.1	TSS200;5'UTR;5'UTR;5'UTR;5'UTR;5'UTR	chr11:12271185-12271495	3
cg13492139	6.61593	1.1e-05	0.0076313	0.10008	HYPER	chr9	111063281	+			II			NA	NA	NA	NA	NA	NA		OpenSea				chr9:111063260-111063260												chr9:111063260-111063475	3
cg05644462	6.61569	1.1e-05	0.0076313	0.0923015	HYPER	chr16	85261785	+			II			NA	NA	NA	NA	NA	NA		OpenSea						TRUE		16:85260344-85262498	Unclassified							chr16:85261680-85262155	3						TRUE
cg05525297	-6.61269	1.1e-05	0.0076529	-0.261944	HYPO	chr16	1533807	+			II			rs11863043	0.361073	NA	NA	NA	NA	chr16:1535925-1536576	N_Shelf							16:1473764-1473954									chr16:1533520-1534070	3						TRUE
cg10399005	6.61239	1.1e-05	0.0076529	0.171711	HYPER	chr14	70316898	+			I	A	Red	rs72725797	0.053016	NA	NA	NA	NA	chr14:70316847-70317240	Island							14:69386576-69386926									chr14:70316885-70317670	3						TRUE
cg16607933	6.61236	1.1e-05	0.0076529	0.04087	HYPER	chr15	28265885	+	OCA2	OCA2;OCA2	II			NA	NA	NA	NA	NA	NA		OpenSea	NM_001300984;NM_000275	Body;Body														chr15:28265765-28266095	3
cg03856157	-6.61102	1.11e-05	0.00765907	-0.21342	HYPO	chr10	119998411	-			II			rs55803428	0.303294	NA	NA	NA	NA		OpenSea																chr10:119998345-119998670	3
cg10503705	6.61079	1.11e-05	0.00765907	0.252551	HYPER	chr1	45009401	+	RNF220	RNF220	II			rs60853517	0.064899	NA	NA	NA	NA		OpenSea	NM_018150	Body								RNF220;RNF220	ENST00000416840.2;ENST00000443020.2	5'UTR;5'UTR	RNF220;RNF220	ENST00000416840.2;ENST00000443020.2	5'UTR;5'UTR			chr1:45007830-45009898	6	chr1:45008180-45009920	6
cg02100997	6.60847	1.11e-05	0.00767804	0.0928903	HYPER	chr1	29585853	-	PTPRU	PTPRU;PTPRU;PTPRU	II			NA	NA	NA	NA	NA	NA	chr1:29585897-29586598	N_Shore	NM_133178;NM_133177;NM_005704	Body;Body;Body								PTPRU	ENST00000345512.3	ExonBnd	PTPRU;PTPRU	ENST00000527027.1;ENST00000345512.3	TSS1500;ExonBnd	chr1:29585705-29587095	3						TRUE
cg05845403	6.60822	1.11e-05	0.00767804	0.088833	HYPER	chr13	96293882	-	DZIP1	DZIP1;DZIP1	II			NA	NA	NA	NA	NA	NA	chr13:96293606-96294603	Island	NM_198968;NM_014934	Body;Body			CDMR	TRUE	13:95091608-95092545			DZIP1	ENST00000466027.1	3'UTR	DZIP1;DZIP1	ENST00000466027.1;ENST00000466569.1	3'UTR;1stExon	chr13:96293520-96293910	3						TRUE
cg12366998	6.60749	1.11e-05	0.00768051	0.101778	HYPER	chr7	2501378	-			II			NA	NA	NA	NA	NA	NA	chr7:2499905-2500127	S_Shore																chr7:2501040-2501455	3
cg08081424	6.60606	1.12e-05	0.00768424	0.131688	HYPER	chr2	159749591	-			II			NA	NA	NA	NA	NA	NA		OpenSea				chr2:159749466-159749466		TRUE														chr2:159748913-159750996	5		TRUE
cg02681389	6.60505	1.12e-05	0.00768424	0.158246	HYPER	chr6	29570781	+	GABBR1	GABBR1;GABBR1;GABBR1	II			NA	NA	NA	NA	NA	NA		OpenSea	NM_021904;NM_021903;NM_001470	3'UTR;3'UTR;3'UTR						6:29570625-29571174	Unclassified_Cell_type_specific	GABBR1;GABBR1;GABBR1;GABBR1;GABBR1	ENST00000377016.4;ENST00000377012.4;ENST00000377034.4;ENST00000355973.3;ENST00000376977.3	3'UTR;3'UTR;3'UTR;3'UTR;3'UTR	GABBR1;GABBR1;GABBR1;GABBR1;GABBR1;GABBR1;GABBR1	ENST00000377016.4;ENST00000377012.4;ENST00000377034.4;ENST00000355973.3;ENST00000472823.1;ENST00000376977.3;ENST00000491829.1	3'UTR;3'UTR;3'UTR;3'UTR;3'UTR;3'UTR;3'UTR			chr6:29570587-29571362	6	chr6:29559465-29571397	6		TRUE
cg00272561	6.60461	1.12e-05	0.00768424	0.167276	HYPER	chr1	15527244	-	TMEM51	TMEM51;TMEM51;TMEM51;TMEM51	II			NA	NA	NA	NA	NA	NA		OpenSea	NM_001136217;NM_001136216;NM_001136218;NM_018022	5'UTR;5'UTR;5'UTR;5'UTR				TRUE				TMEM51;TMEM51;TMEM51;TMEM51	ENST00000428417.1;ENST00000376014.3;ENST00000434578.1;ENST00000303840.4	5'UTR;5'UTR;5'UTR;5'UTR	TMEM51;TMEM51;TMEM51;TMEM51;TMEM51	ENST00000428417.1;ENST00000376014.3;ENST00000451326.1;ENST00000434578.1;ENST00000303840.4	5'UTR;5'UTR;5'UTR;5'UTR;5'UTR	chr1:15526925-15527595	3
cg02896266	6.60445	1.12e-05	0.00768424	0.0563337	HYPER	chr1	864879	-	SAMD11,AL645608.1	SAMD11	II			NA	NA	NA	NA	NA	NA	chr1:858970-861632	S_Shelf	NM_152486	Body					1:854414-855564						SAMD11	ENST00000341065.4	TSS1500			chr1:863744-869489	6				TRUE
cg16929760	-6.60427	1.12e-05	0.00768424	-0.187001	HYPO	chr1	196397341	-	KCNT2	KCNT2;KCNT2;KCNT2	II			NA	NA	NA	NA	NA	NA		OpenSea	NM_001287820;NM_001287819;NM_198503	Body;Body;Body								KCNT2	ENST00000498426.1	3'UTR	KCNT2;KCNT2	ENST00000466914.1;ENST00000498426.1	TSS200;3'UTR
cg13782035	6.60399	1.12e-05	0.00768424	0.363961	HYPER	chr5	90610422	+		LUCAT1;LUCAT1	II			NA	NA	NA	NA	NA	NA		OpenSea	NR_103548;NR_103549	TSS1500;TSS1500						5:90610016-90610481	Unclassified_Cell_type_specific	RP11-213H15.3	ENST00000513626.1	TSS1500	RP11-213H15.3;RP11-213H15.3	ENST00000511918.1;ENST00000513626.1	TSS1500;TSS1500	chr5:90610025-90610455	3
cg11199862	-6.60266	1.12e-05	0.00769429	-0.115731	HYPO	chr13	46108984	+	COG3,FAM194B	COG3	II			rs1061694	0.156308	NA	NA	NA	NA		OpenSea	NM_031431	3'UTR								COG3;FAM194B	ENST00000349995.5;ENST00000504261.1	3'UTR;3'UTR	COG3;FAM194B	ENST00000349995.5;ENST00000504261.1	3'UTR;3'UTR								TRUE
cg26984309	-6.59951	1.13e-05	0.00772151	-0.234827	HYPO	chr1	96071090	-	RP11-286B14.1		II			NA	NA	NA	NA	NA	NA		OpenSea										RP11-286B14.1;RP11-286B14.1	ENST00000456933.1;ENST00000432146.1	5'UTR;5'UTR	RP11-286B14.1;RP11-286B14.1	ENST00000456933.1;ENST00000432146.1	5'UTR;5'UTR					chr1:96069872-96071197	5
cg21302622	6.59946	1.13e-05	0.00772151	0.0567983	HYPER	chr2	209271234	+	PTH2R	PTH2R	II			NA	NA	NA	NA	NA	NA	chr2:209271337-209271987	N_Shore	NM_005048	TSS1500				TRUE	2:208979450-208980367			PTH2R;PTH2R	ENST00000272847.2;ENST00000413482.1	TSS1500;5'UTR	PTH2R;PTH2R	ENST00000272847.2;ENST00000413482.1	TSS1500;5'UTR			chr2:209271146-209272179	5	chr2:209271146-209272861	6		TRUE
cg05781893	-6.59643	1.13e-05	0.00774873	-0.315187	HYPO	chr2	179312799	+	PRKRA	PRKRA;MIR548N;PRKRA;PRKRA	II			NA	NA	rs73036307	0.03065	NA	NA	chr2:179315214-179316573	N_Shelf	NM_003690;NR_031666;NM_001139517;NM_001139518	Body;Body;Body;Body								PRKRA;PRKRA	ENST00000438687.3;ENST00000470200.1	5'UTR;3'UTR	PRKRA;PRKRA;PRKRA;PRKRA	ENST00000438687.3;ENST00000470200.1;ENST00000460433.1;ENST00000466165.1	5'UTR;3'UTR;3'UTR;3'UTR					chr2:179312692-179318309	6		TRUE
cg10637955	6.59627	1.13e-05	0.00774873	0.0361385	HYPER	chr2	201675829	+	AC007163.6,BZW1	BZW1	II			rs78244989	0.02436	NA	NA	NA	NA	chr2:201675989-201677306	N_Shore	NM_014670	TSS1500								BZW1;BZW1;BZW1;BZW1;AC007163.6	ENST00000409600.1;ENST00000431249.3;ENST00000409226.1;ENST00000452790.2;ENST00000447972.3	TSS1500;TSS1500;TSS1500;TSS1500;3'UTR	BZW1;BZW1;BZW1;BZW1;BZW1;BZW1;BZW1;AC007163.6	ENST00000452206.1;ENST00000464483.1;ENST00000460660.1;ENST00000431249.3;ENST00000450637.1;ENST00000409226.1;ENST00000452790.2;ENST00000447972.3	TSS1500;TSS1500;TSS1500;TSS1500;5'UTR;TSS1500;TSS1500;3'UTR			chr2:201674935-201677932	6	chr2:201674555-201686997	6	TRUE	TRUE
cg16980686	-6.5955	1.13e-05	0.00775072	-0.318547	HYPO	chr1	75888911	-	SLC44A5	SLC44A5;SLC44A5	II			NA	NA	NA	NA	NA	NA		OpenSea	NM_001130058;NM_152697	Body;Body								SLC44A5	ENST00000469525.1	3'UTR	SLC44A5	ENST00000469525.1	3'UTR	chr1:75888880-75889070	3
cg07660029	6.59505	1.14e-05	0.00775072	0.0793549	HYPER	chr1	87169387	-	RP4-612B15.3	SH3GLB1;SH3GLB1;SH3GLB1;SH3GLB1	II			NA	NA	NA	NA	NA	NA	chr1:87169875-87171015	N_Shore	NM_016009;NM_001206652;NM_001206651;NM_001206653	TSS1500;TSS1500;TSS1500;TSS1500						1:87169355-87170697	Promoter_Associated	SH3GLB1;SH3GLB1;SH3GLB1;RP4-612B15.3	ENST00000212369.5;ENST00000535010.1;ENST00000482504.1;ENST00000565575.1	TSS1500;TSS1500;TSS1500;1stExon	SH3GLB1;SH3GLB1;SH3GLB1;RP4-612B15.3	ENST00000212369.5;ENST00000535010.1;ENST00000482504.1;ENST00000565575.1	TSS1500;TSS1500;TSS1500;1stExon	chr1:87169385-87170090	3
cg11078128	6.59385	1.14e-05	0.00775532	0.137271	HYPER	chr1	6336743	+	ACOT7	ACOT7;ACOT7;ACOT7;ACOT7	II			NA	NA	NA	NA	NA	NA	chr1:6339948-6340268	N_Shelf	NM_181866;NM_181865;NM_181864;NM_007274	Body;Body;Body;Body		chr1:6336471-6336471		TRUE							ACOT7;ACOT7	ENST00000377860.4;ENST00000418124.1	3'UTR;3'UTR	chr1:6336225-6336915	3
cg00542975	-6.59364	1.14e-05	0.00775532	-0.302674	HYPO	chr2	122392291	-	CLASP1	CLASP1;CLASP1;CLASP1	II			NA	NA	NA	NA	NA	NA		OpenSea	NM_015282;NM_001142274;NM_001142273	5'UTR;5'UTR;5'UTR				TRUE				CLASP1;CLASP1	ENST00000263710.4;ENST00000409078.2	5'UTR;5'UTR	CLASP1;CLASP1	ENST00000397587.3;ENST00000409078.2	5'UTR;5'UTR	chr2:122391920-122392475	3						TRUE
cg08129017	6.59127	1.14e-05	0.00777885	0.134312	HYPER	chr17	17728660	+	SREBF1	SREBF1;SREBF1	II			NA	NA	NA	NA	NA	NA	chr17:17726855-17727282	S_Shore	NM_004176;NM_001005291	Body;Body				TRUE		17:17728479-17728779	Promoter_Associated_Cell_type_specific							chr17:17727885-17728930	3						TRUE
cg16681439	6.58947	1.15e-05	0.0077919	0.24308	HYPER	chr1	6786391	-	RP11-242F24.1	LOC100505887;LOC100505887	II			NA	NA	NA	NA	NA	NA		OpenSea	NR_104620;NR_104621	Body;TSS1500								RP11-242F24.1;RP11-242F24.1;RP11-242F24.1	ENST00000432429.1;ENST00000414210.1;ENST00000421469.1	5'UTR;5'UTR;TSS1500	RP11-242F24.1;RP11-242F24.1;RP11-242F24.1	ENST00000432429.1;ENST00000414210.1;ENST00000421469.1	5'UTR;5'UTR;TSS1500
cg05624564	6.589	1.15e-05	0.0077919	0.0393504	HYPER	chr8	143509535	+			II			NA	NA	NA	NA	NA	NA	chr8:143509372-143509630	Island							8:143505936-143506632									chr8:143509360-143509855	3						TRUE
cg25541956	-6.58868	1.15e-05	0.0077919	-0.0935427	HYPO	chr14	69021030	+	RAD51B	RAD51B	II			NA	NA	NA	NA	NA	NA		OpenSea	NM_133509	Body				TRUE							RAD51B;RAD51B;RAD51B	ENST00000553595.1;ENST00000554244.1;ENST00000478014.1	5'UTR;5'UTR;5'UTR	chr14:69020945-69021415	3
cg00483944	6.58788	1.15e-05	0.00779336	0.26453	HYPER	chr17	59422406	-	BCAS3	BCAS3;BCAS3	II			NA	NA	NA	NA	NA	NA		OpenSea	NM_001099432;NM_017679	Body;Body														chr17:59422340-59422735	3
cg21627412	6.58711	1.15e-05	0.00779336	0.0961592	HYPER	chr13	96297281	+		DZIP1;DZIP1	II			NA	NA	NA	NA	NA	NA	chr13:96296143-96297059	S_Shore	NM_198968;NM_014934	TSS1500;TSS1500					13:95095198-95095350			DZIP1;DZIP1;DZIP1	ENST00000466027.1;ENST00000361396.2;ENST00000376829.2	TSS1500;TSS1500;TSS1500	DZIP1;DZIP1;DZIP1	ENST00000466027.1;ENST00000361396.2;ENST00000376829.2	TSS1500;TSS1500;TSS1500			chr13:96295606-96297569	6	chr13:96295429-96297717	6		TRUE
cg12579743	6.58672	1.15e-05	0.00779336	0.0758487	HYPER	chr19	7744943	+	CTD-3214H19.16	TRAPPC5;TRAPPC5;TRAPPC5	II			NA	NA	NA	NA	NA	NA	chr19:7745490-7747714	N_Shore	NM_174894;NM_001042462;NM_001042461	TSS1500;TSS1500;TSS1500								TRAPPC5;TRAPPC5	ENST00000317378.4;ENST00000426877.1	TSS1500;TSS1500	TRAPPC5;TRAPPC5	ENST00000317378.4;ENST00000426877.1	TSS1500;TSS1500			chr19:7743844-7745130	6	chr19:7743983-7748083	6
cg24102931	6.58647	1.15e-05	0.00779336	0.0822963	HYPER	chr12	6485373	-	SCNN1A,LTBR	SCNN1A;SCNN1A;SCNN1A;LTBR	II			NA	NA	NA	NA	NA	NA		OpenSea	NM_001159576;NM_001038;NM_001159575;NM_001270987	TSS1500;TSS1500;Body;Body				TRUE				SCNN1A;SCNN1A;SCNN1A;SCNN1A;LTBR	ENST00000396966.2;ENST00000360168.3;ENST00000538979.1;ENST00000228916.2;ENST00000546296.1	TSS1500;TSS1500;TSS1500;TSS1500;5'UTR	SCNN1A;SCNN1A;SCNN1A;SCNN1A;SCNN1A;SCNN1A;SCNN1A;SCNN1A;SCNN1A;SCNN1A;SCNN1A;LTBR;LTBR	ENST00000538957.1;ENST00000545605.1;ENST00000396966.2;ENST00000542436.1;ENST00000543585.1;ENST00000360168.3;ENST00000536176.1;ENST00000538979.1;ENST00000228916.2;ENST00000544882.1;ENST00000536411.1;ENST00000546296.1;ENST00000542830.1	3'UTR;3'UTR;TSS1500;TSS1500;TSS1500;TSS1500;TSS1500;TSS1500;TSS1500;TSS1500;TSS200;5'UTR;5'UTR	chr12:6485140-6486175	3
cg10943932	6.58443	1.16e-05	0.00781258	0.110572	HYPER	chr11	2922833	-	SLC22A18AS,SLC22A18	SLC22A18AS;SLC22A18;SLC22A18	II			rs116582087	0.014335	NA	NA	NA	NA	chr11:2923301-2923817	N_Shore	NM_007105;NM_183233;NM_002555	5'UTR;5'UTR;TSS1500						11:2922742-2924390	Promoter_Associated	SLC22A18AS;SLC22A18;SLC22A18;SLC22A18;SLC22A18;SLC22A18AS	ENST00000533594.1;ENST00000347936.2;ENST00000312221.5;ENST00000449793.2;ENST00000380574.1;ENST00000455942.2	5'UTR;5'UTR;TSS1500;TSS1500;TSS1500;5'UTR	SLC22A18AS;SLC22A18;SLC22A18;SLC22A18;SLC22A18;SLC22A18AS	ENST00000533594.1;ENST00000347936.2;ENST00000312221.5;ENST00000449793.2;ENST00000380574.1;ENST00000455942.2	5'UTR;5'UTR;TSS1500;TSS1500;TSS1500;5'UTR			chr11:2922357-2926306	6	chr11:2922427-2926310	6		TRUE
cg08881610	-6.58393	1.16e-05	0.00781258	-0.208461	HYPO	chr6	100581833	+			II			NA	NA	NA	NA	NA	NA	chr6:100583880-100584154	N_Shelf								6:100581797-100582000	Unclassified_Cell_type_specific														TRUE
cg16170116	6.58309	1.16e-05	0.0078167	0.169252	HYPER	chr2	235772222	+	AC010148.1		II			NA	NA	NA	NA	NA	NA		OpenSea										AC010148.1;AC010148.1	ENST00000435896.1;ENST00000427619.1	3'UTR;3'UTR	AC010148.1;AC010148.1	ENST00000435896.1;ENST00000427619.1	3'UTR;3'UTR	chr2:235771980-235772335	3
cg11852646	6.5823	1.16e-05	0.00781752	0.30898	HYPER	chr7	1956546	+	MAD1L1	MAD1L1;MAD1L1;MAD1L1	I	T	Red	NA	NA	NA	NA	NA	NA		OpenSea	NM_003550;NM_001013837;NM_001013836	Body;Body;Body					7:1922210-1923137											chr7:1954535-1960945	6				TRUE
cg26440479	6.58163	1.16e-05	0.00781752	0.305271	HYPER	chr1	37507526	+			II			rs116466313	0.013467	NA	NA	NA	NA		OpenSea						TRUE										chr1:37507345-37507995	3
cg08250738	6.58127	1.16e-05	0.00781752	0.299538	HYPER	chr5	73772012	-	CTC-419K13.1		II			NA	NA	NA	NA	NA	NA		OpenSea						TRUE				CTC-419K13.1	ENST00000507781.1	3'UTR	CTC-419K13.1	ENST00000507781.1	3'UTR								TRUE
cg08032665	6.58094	1.16e-05	0.00781752	0.0905697	HYPER	chr1	156642838	+	NES	NES	II			NA	NA	NA	NA	NA	NA	chr1:156646292-156647260	N_Shelf	NM_006617	Body																		chr1:156642390-156648419	6		TRUE
cg22581536	6.57942	1.17e-05	0.00783041	0.402801	HYPER	chr5	92944795	-		MIR548AO	II			NA	NA	NA	NA	NA	NA		OpenSea	NR_049801	Body																		chr5:92942856-92948845	6
cg15947854	6.57788	1.17e-05	0.00783101	0.132404	HYPER	chr7	105447254	+	ATXN7L1	ATXN7L1;ATXN7L1	II			NA	NA	NA	NA	NA	NA		OpenSea	NM_020725;NM_152749	Body;Body						7:105447159-105447382	Unclassified_Cell_type_specific				ATXN7L1	ENST00000481880.1	3'UTR	chr7:105447060-105447415	3
cg16203213	6.57708	1.17e-05	0.00783101	0.18672	HYPER	chr10	45398814	+	TMEM72-AS1,RP11-285G1.2	TMEM72-AS1	II			NA	NA	NA	NA	NA	NA		OpenSea	NR_033842	Body								RP11-285G1.2;TMEM72-AS1	ENST00000436877.1;ENST00000450287.1	3'UTR;3'UTR	RP11-285G1.2;TMEM72-AS1	ENST00000436877.1;ENST00000450287.1	3'UTR;3'UTR	chr10:45398600-45399335	3
cg09012602	6.57686	1.17e-05	0.00783101	0.122311	HYPER	chr20	61667737	+	RP11-305P22.9,LINC00029	LINC00029;LOC63930	II			NA	NA	NA	NA	NA	NA	chr20:61665780-61666555	S_Shore	NR_028295;NR_033370	Body;Body					20:61137683-61138402			LINC00029;LINC00029;LINC00029;LINC00029;LINC00029	ENST00000414668.1;ENST00000370341.3;ENST00000414668.1;ENST00000370341.3;ENST00000456634.1	3'UTR;3'UTR;1stExon;1stExon;TSS200	LINC00029;LINC00029;LINC00029;LINC00029;LINC00029	ENST00000414668.1;ENST00000370341.3;ENST00000414668.1;ENST00000370341.3;ENST00000456634.1	3'UTR;3'UTR;1stExon;1stExon;TSS200	chr20:61667645-61668035	3
cg17223789	6.57674	1.17e-05	0.00783101	0.227504	HYPER	chr17	27482084	+	MYO18A,RP11-321A17.4	MYO18A;MYO18A	II			NA	NA	NA	NA	NA	NA		OpenSea	NM_203318;NM_078471	Body;Body														chr17:27481485-27482355	3
cg00448659	6.57657	1.17e-05	0.00783101	0.0671544	HYPER	chr7	150709877	+	NOS3,ATG9B	ATG9B;NOS3	II			NA	NA	NA	NA	NA	NA	chr7:150710349-150711333	N_Shore	NM_173681;NM_000603	3'UTR;Body						7:150709433-150711700	Promoter_Associated	NOS3;ATG9B	ENST00000477227.1;ENST00000494791.1	5'UTR;3'UTR	NOS3;NOS3;NOS3;NOS3;NOS3;NOS3;ATG9B;ATG9B;ATG9B	ENST00000468293.1;ENST00000477227.1;ENST00000486784.1;ENST00000475454.1;ENST00000468870.1;ENST00000468870.1;ENST00000472699.1;ENST00000494791.1;ENST00000377974.2	5'UTR;5'UTR;TSS1500;5'UTR;1stExon;5'UTR;TSS1500;3'UTR;3'UTR			chr7:150708876-150711725	6	chr7:150709148-150711678	6		TRUE
cg17345450	6.57626	1.17e-05	0.00783101	0.109104	HYPER	chr6	166259938	-	PDE10A		II			NA	NA	NA	NA	NA	NA		OpenSea						TRUE	6:166179903-166180003			RP11-252P19.3	ENST00000535229.1	3'UTR	RP11-252P19.3	ENST00000535229.1	3'UTR	chr6:166259605-166260195	3						TRUE
cg10120841	-6.57545	1.17e-05	0.00783478	-0.134509	HYPO	chr11	35606942	+			II			NA	NA	NA	NA	NA	NA		OpenSea										RP5-945I17.2	ENST00000527684.1	TSS200	RP5-945I17.2	ENST00000527684.1	TSS200
cg22710968	6.57312	1.18e-05	0.00785031	0.235574	HYPER	chr3	140182440	+	CLSTN2	CLSTN2	II			rs16850323	0.282639	NA	NA	NA	NA		OpenSea	NM_022131	Body								RP11-68L1.1	ENST00000483759.2	TSS1500	RP11-68L1.1;CLSTN2	ENST00000483759.2;ENST00000511524.1	TSS1500;5'UTR
cg18643262	-6.57269	1.18e-05	0.00785031	-0.107121	HYPO	chr20	30426542	+			II			NA	NA	NA	NA	NA	NA		OpenSea																chr20:30426420-30426650	3
cg16660580	-6.57238	1.18e-05	0.00785031	-0.1765	HYPO	chr6	41043776	+	OARD1,NFYA	NFYA;NFYA	II			NA	NA	NA	NA	NA	NA	chr6:41039981-41041679	S_Shelf	NM_021705;NM_002505	5'UTR;5'UTR								C6orf130;NFYA;NFYA	ENST00000480585.1;ENST00000341376.6;ENST00000353205.5	5'UTR;5'UTR;5'UTR	C6orf130;C6orf130;NFYA;NFYA	ENST00000480585.1;ENST00000488238.1;ENST00000341376.6;ENST00000353205.5	5'UTR;5'UTR;5'UTR;5'UTR								TRUE
cg01157496	6.57183	1.18e-05	0.00785031	0.0858336	HYPER	chr15	70551157	+			II			rs140210293	0.0147	NA	NA	NA	NA		OpenSea				chr15:70551051-70551051				15:70550912-70552770	Unclassified							chr15:70551000-70551315	3
cg20904475	6.57168	1.18e-05	0.00785031	0.106806	HYPER	chr8	61823027	+	AC022182.1		II			NA	NA	NA	NA	NA	NA	chr8:61822358-61823028	Island							8:61984882-61985582	8:61821511-61823439	Promoter_Associated	AC022182.1;AC022182.1	ENST00000529234.1;ENST00000526936.1	TSS200;5'UTR	AC022182.1;AC022182.1	ENST00000529234.1;ENST00000526936.1	TSS200;5'UTR	chr8:61822805-61823410	3						TRUE
cg11632675	6.57105	1.18e-05	0.00785181	0.0710802	HYPER	chr3	111392677	-		PLCXD2;PLCXD2	II			NA	NA	NA	NA	NA	NA	chr3:111393190-111393544	N_Shore	NM_001185106;NM_153268	TSS1500;TSS1500								PLCXD2;PLCXD2	ENST00000393934.3;ENST00000477665.1	TSS1500;TSS1500	PLCXD2;PLCXD2	ENST00000393934.3;ENST00000477665.1	TSS1500;TSS1500					chr3:111392601-111394536	6
cg04702872	6.56909	1.19e-05	0.00786895	0.128698	HYPER	chr2	45876958	-			II			NA	NA	NA	NA	NA	NA	chr2:45877178-45879685	N_Shore																chr2:45876620-45877995	3						TRUE
cg03971023	6.56862	1.19e-05	0.00786895	0.25817	HYPER	chr19	4045025	-	ZBTB7A		II			NA	NA	NA	NA	NA	NA	chr19:4044917-4045154	Island						TRUE	19:3995950-3996190									chr19:4045025-4045515	3						TRUE
cg23012937	6.56797	1.19e-05	0.00786895	0.102221	HYPER	chr19	41304072	+	RAB4B-EGLN2	EGLN2;EGLN2;RAB4B-EGLN2	II			NA	NA	NA	NA	NA	NA	chr19:41304467-41305050	N_Shore	NM_080732;NM_053046;NR_037791	TSS1500;TSS1500;Body		chr19:41304071-41304071				19:41303968-41305822	Promoter_Associated	EGLN2	ENST00000303961.3	TSS1500	EGLN2	ENST00000303961.3	TSS1500	chr19:41304040-41304295	3
cg12717591	6.56723	1.19e-05	0.00786895	0.0462164	HYPER	chr10	7205138	-	SFMBT2	SFMBT2	II			NA	NA	NA	NA	NA	NA		OpenSea	NM_001029880	3'UTR								SFMBT2;SFMBT2	ENST00000361972.4;ENST00000397167.1	3'UTR;3'UTR	SFMBT2;SFMBT2	ENST00000361972.4;ENST00000397167.1	3'UTR;3'UTR								TRUE
cg13776039	-6.56716	1.19e-05	0.00786895	-0.30511	HYPO	chr13	99118960	+	STK24	STK24;STK24;STK24	II			rs9584855	0.235336	NA	NA	NA	NA		OpenSea	NM_003576;NM_001032296;NM_001286649	Body;Body;Body						13:99118649-99119931	Unclassified				STK24	ENST00000376554.4	TSS200	chr13:99118940-99119235	3
cg09530868	-6.56546	1.19e-05	0.00787581	-0.324363	HYPO	chr18	8603879	+			II			NA	NA	NA	NA	NA	NA		OpenSea																		chr18:8603743-8604556	6	chr18:8600246-8604703	6
cg18397517	6.56531	1.19e-05	0.00787581	0.0789966	HYPER	chr14	95048035	+	SERPINA5	SERPINA5	II			NA	NA	NA	NA	NA	NA		OpenSea	NM_000624	5'UTR				TRUE				SERPINA5;SERPINA5;SERPINA5;SERPINA5;SERPINA5;SERPINA5;SERPINA5	ENST00000554866.1;ENST00000537685.1;ENST00000438291.2;ENST00000554276.1;ENST00000554276.1;ENST00000329597.7;ENST00000553780.1	5'UTR;5'UTR;5'UTR;1stExon;5'UTR;ExonBnd;5'UTR	SERPINA5;SERPINA5;SERPINA5;SERPINA5;SERPINA5;SERPINA5;SERPINA5;SERPINA5;SERPINA5;SERPINA5;SERPINA5;SERPINA5;SERPINA5;SERPINA5;SERPINA5;SERPINA5	ENST00000556064.1;ENST00000556730.1;ENST00000554760.1;ENST00000556775.1;ENST00000553511.1;ENST00000553511.1;ENST00000554506.1;ENST00000537685.1;ENST00000554633.1;ENST00000555681.1;ENST00000438291.2;ENST00000554276.1;ENST00000554276.1;ENST00000557598.1;ENST00000554760.1;ENST00000554220.1	TSS1500;5'UTR;5'UTR;5'UTR;1stExon;5'UTR;5'UTR;5'UTR;5'UTR;5'UTR;5'UTR;1stExon;5'UTR;TSS200;ExonBnd;5'UTR	chr14:95047965-95048250	3						TRUE
cg16388229	6.56469	1.19e-05	0.00787581	0.211502	HYPER	chr18	46269007	-	CTIF	CTIF;CTIF	II			NA	NA	NA	NA	NA	NA		OpenSea	NM_014772;NM_001142397	Body;Body				TRUE
cg06677142	6.56445	1.19e-05	0.00787581	0.186227	HYPER	chr17	17675077	-	RAI1	RAI1	II			NA	NA	NA	NA	NA	NA		OpenSea	NM_030665	5'UTR				TRUE				RAI1-AS1;RAI1	ENST00000443696.1;ENST00000353383.1	TSS1500;5'UTR	RAI1-AS1;RAI1	ENST00000443696.1;ENST00000353383.1	TSS1500;5'UTR
[truncated: 81,438 more rows]

## Sheet: DMR analysis_SC<0.05
Chr	start position (hg19)	end position (hg19)	width	strand	no.cpgs	min_smoothed_fdr	Stouffer	HMFDR	Fisher	maxdiff	meandiff	Gene_Name_1	Gene_Name_2	Gene_Name_3	Gene_Name_4	Gene_Name_5	Gene_Name_6	Gene_Name_7	Gene_Name_8	Position (hg19)	Direction		108
[truncated: 2,091 more rows]

[truncated: 4 more sheets: DEG analysis_FDR<0.05, DMR(SC<0.05)_DEG (P<0.05), eQTM_P<0.05, REPLICATION_MENDIOROZ_(S9)]
